# Supplementary material for: An Integrated High Throughput Experimentation/Predictive QSAR Modeling Approach to ansa-Zirconocene Catalysts for Isotactic Polypropylene
Source: MDPI journal article supplement (doi:10.3390/polym12051005), 2020-04-27
Supplement: s1 [file s1]

# SUPPORTING INFORMATION

## **An Integrated High Throughput Experimentation / Predictive QSAR Modeling Approach to *ansa*-Zirconocene Catalysts for i-PP**

*Christian Ehm,<sup>a,\*</sup> Antonio Vittoria,<sup>a</sup> Georgy P. Goryunov,<sup>b</sup> Vyatcheslav V. Izmer,<sup>b</sup> Dmitry S. Kononovich,<sup>b</sup> Oleg V. Samsonov,<sup>b</sup> Rocco Di Girolamo,<sup>a</sup> Peter H. M. Budzelaar,<sup>a</sup> Alexander Z. Voskoboynikov,<sup>b</sup> Vincenzo Busico,<sup>a</sup> Dmitry V. Uborsky<sup>b,\*</sup> and Roberta Cipullo<sup>a,\*</sup>*

<sup>a</sup> Dipartimento di Scienze Chimiche, Università di Napoli Federico II, Via Cintia, 80126 Napoli (Italy); DPI, P.O. Box 902, 5600 AX Eindhoven, the Netherlands.

<sup>b</sup> Department of Chemistry, Lomonosov Moscow State University, 1/3 Leninskie Gory, 119991 Moscow (Russia); DPI, P.O. Box 902, 5600 AX Eindhoven, the Netherlands.

## Contents

|                                                                                                     |    |
|-----------------------------------------------------------------------------------------------------|----|
| 1. Synthesis of the Pre-catalysts .....                                                             | 3  |
| General Comments .....                                                                              | 3  |
| M20 .....                                                                                           | 3  |
| M21 .....                                                                                           | 5  |
| M22 .....                                                                                           | 8  |
| M23 .....                                                                                           | 10 |
| M24 .....                                                                                           | 13 |
| M25 .....                                                                                           | 16 |
| M27 .....                                                                                           | 20 |
| M28 .....                                                                                           | 24 |
| M31 .....                                                                                           | 26 |
| M32 .....                                                                                           | 28 |
| M33 .....                                                                                           | 30 |
| M34 .....                                                                                           | 33 |
| M35 .....                                                                                           | 36 |
| M36 .....                                                                                           | 38 |
| M39 .....                                                                                           | 40 |
| M40 .....                                                                                           | 42 |
| M41 .....                                                                                           | 47 |
| M42 .....                                                                                           | 50 |
| M43 .....                                                                                           | 52 |
| References .....                                                                                    | 55 |
| 2. Polymerization Details .....                                                                     | 56 |
| Table S1. Propene Polymerization Experiments. ....                                                  | 57 |
| Table S1, ctd. Propene Polymerization Experiments. ....                                             | 58 |
| Table S2. Full Polymer Characterization. ....                                                       | 59 |
| Table S2, ctd. Full Polymer Characterization. ....                                                  | 60 |
| Table S3. Performance of selected catalysts when activated with MAO. ....                           | 61 |
| Experimental Trends -Deleterious Effect of 3-Position Substituents on Molar Mass Capability .....   | 61 |
| 3. QSAR Modeling .....                                                                              | 62 |
| QSAR Modeling – General Comments .....                                                              | 62 |
| QSAR Modeling – Descriptor Pool.....                                                                | 63 |
| QSAR Modeling – Determination of Gibbs Free Energy Differences .....                                | 66 |
| QSAR Modeling – %V <sub>Bur,Zr</sub> determination.....                                             | 69 |
| QSAR Modeling – Equations for Stereo-, Regioselectivity and Molecular Weight Capability Models..... | 71 |
| QSAR Modeling – Stereoselectivity Model .....                                                       | 72 |
| QSAR Modeling – Stereoselectivity Model, Analysis of Variance .....                                 | 75 |
| QSAR Modeling – Stereoselectivity Model, Leave-One-Out Analysis.....                                | 76 |
| QSAR Modeling – Molar Mass Capability Model, Single Descriptor Model.....                           | 77 |
| QSAR Modeling – Molar Mass Capability Model, Final Model .....                                      | 78 |
| QSAR Modeling – Molar Mass Capability Model, Analysis of Variance .....                             | 80 |
| QSAR Modeling – Molar Mass Capability Model, Leave-One-Out Analysis.....                            | 81 |
| QSAR Modeling – Regioselectivity, Final Model .....                                                 | 82 |
| QSAR Modeling – Regioselectivity Model, Analysis of Variance.....                                   | 84 |
| QSAR Modeling – Regioselectivity Model, Leave-One-Out Analysis.....                                 | 85 |
| QSAR Modeling – Screened Catalyst Candidates and Predicted Performance.....                         | 86 |
| 4. Full Gaussian Citation.....                                                                      | 88 |

# 1. Synthesis of the Pre-catalysts

## General Comments

All manipulations with compounds which are sensitive to moisture and air were performed either in an atmosphere of purified argon using a standard Schlenk technique or in a controlled atmosphere glove box (MBraun). Bis(2,5-dimethyl-4-phenyl-1*H*-inden-1-yl)dimethylsilane [1], 4-bromo-2,6-dimethyl-1-methoxyindane [2], 4-bromo-1-methoxy-6-isopropyl-2-methylindane and 2,6-dimethyl-4-(3,5-di-*tert*-butylphenyl)-1*H*-indene [3], 4-bromo-1-methoxy-6-*tert*-butyl-2-methylindane and 5-*tert*-butyl-7-(3,5-di-*tert*-butylphenyl)-2-methyl-1*H*-indene [4], 7-bromo-5-*tert*-butyl-2-methyl-1*H*-indene [5], 2-methyl-4-bromo-6-chloro-1*H*-indene [6]; metallocenes M26 [7], M29 [8], M30 [9], M37 [10], M38 [11]; NiCl<sub>2</sub>(PPh<sub>3</sub>)IPr [12], [PhN(CH<sub>2</sub>)<sub>3</sub>NPh]ZrCl<sub>2</sub>(THF)<sub>2</sub> [13], (5-bromo-1,3-phenylene)bis(trimethylsilane) [14], 6-methoxy-2-methyl-2,3-dihydro-1*H*-inden-1-one [15] were synthesized according to the published procedures. Tetrahydrofuran and diethyl ether were distilled from sodium benzophenone ketyl. Hydrocarbon solvents were degassed by bubbling with argon and dried over molecular sieves 4A. Dichloromethane-*d*<sub>2</sub>, chloroform-*d* and benzene-*d*<sub>6</sub> were freeze-pump-thaw degassed on a vacuum line and dried over molecular sieves 3Å. <sup>1</sup>H and <sup>13</sup>C{<sup>1</sup>H} spectra were recorded with Bruker Avance-400 spectrometers for 1–10% solutions in deuterated solvents. Chemical shifts for <sup>1</sup>H and <sup>13</sup>C were measured relatively to TMS or deuterated solvent residual signals. C, H microanalyses were done using Vario Micro Cube analyzer. HRMS spectra were measured using Orbitrap Elite instrument.

## M20

### *rac*-dimethylsilanediyl-bis(η<sup>5</sup>-2,5-dimethyl-4-phenyl-inden-1-yl)dimethylzirconium (M20)

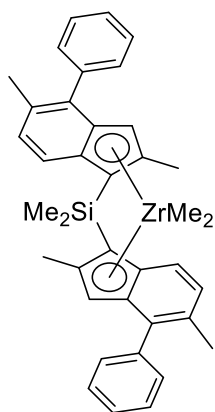

To a cooled to –40 °C solution of 4.80 g (9.66 mmol) of bis(2,5-dimethyl-4-phenyl-1*H*-inden-1-yl)dimethylsilane in 200 ml of ether 7.70 ml (19.3 mmol) of 2.5 M <sup>*n*</sup>BuLi in hexanes was added in one portion. This mixture was stirred overnight at room temperature. The resulting light-yellow solution was cooled to –80 °C, and 3.64 g (9.66 mmol) of ZrCl<sub>4</sub>(THF)<sub>2</sub> was added. The reaction mixture was stirred for 24 h, then evaporated to dryness. The residue was heated with 250 ml of toluene, and the formed hot suspension was filtered through glass frit (G4). The filtrate was evaporated to dryness giving 2.90 g of a 1:1 mixture of *rac*- and *meso*-complexes. Further on, 1.20 g (1.83 mmol) of this crude mixture was dissolved in 100 ml of toluene, and 2.03 ml (5.5 mmol, 2.7 M) of MeMgBr in diethyl ether was added. The reaction mixture was stirred at 90 °C

overnight and then evaporated to dryness. The crude product was extracted with 2 x 50 ml of hot toluene, the combined extract was filtered through a thin pad of Celite 503, then the filtrate was evaporated to dryness yielding 870 mg of a 20:1 mixture of *meso*- and *rac*-dimethylsilanediylbis[η<sup>5</sup>-2,5-dimethyl-4-phenyl-inden-1-yl]dimethylzirconium. This product was dissolved in 50 ml of THF, and 10 mg of LiCl was added. The reaction mixture was stirred overnight at 50 °C, then evaporated to dryness. The resulting sticky solids were extracted with 2 x 50 ml of hot methylcyclohexane. The combined extract was filtered through a thin pad of Celite 503, and the filtrate was evaporated to dryness. Thus obtained solid was recrystallized three times from hexane yielding 90 mg (1.5%) of analytically pure racemic ZrMe<sub>2</sub>-complex as a light-yellow powder. *Rac*-zirconocene. Anal. calc. for C<sub>38</sub>H<sub>40</sub>SiZr: C, 74.09; H, 6.54. Found: C, 74.28; H, 6.70. <sup>1</sup>H NMR (CDCl<sub>3</sub>): δ 7.47–7.30 (m, 10H), 7.39 (d, *J* = 8.9 Hz, 2H), 6.89 (d, *J* = 8.9 Hz, 2H), 6.44 (br.s, 2H), 2.26 (s, 6H), 2.05

(s, 6H), 1.07 (s, 6H), -1.19 (s, 6H).  $^{13}\text{C}\{^1\text{H}\}$  NMR ( $\text{C}_6\text{D}_6$ ):  $\delta$  140.1, 136.0, 134.4, 131.62, 131.61, 127.4, 126.0, 124.7, 116.3, 78.5, 35.5, 19.9, 18.2, 2.4.

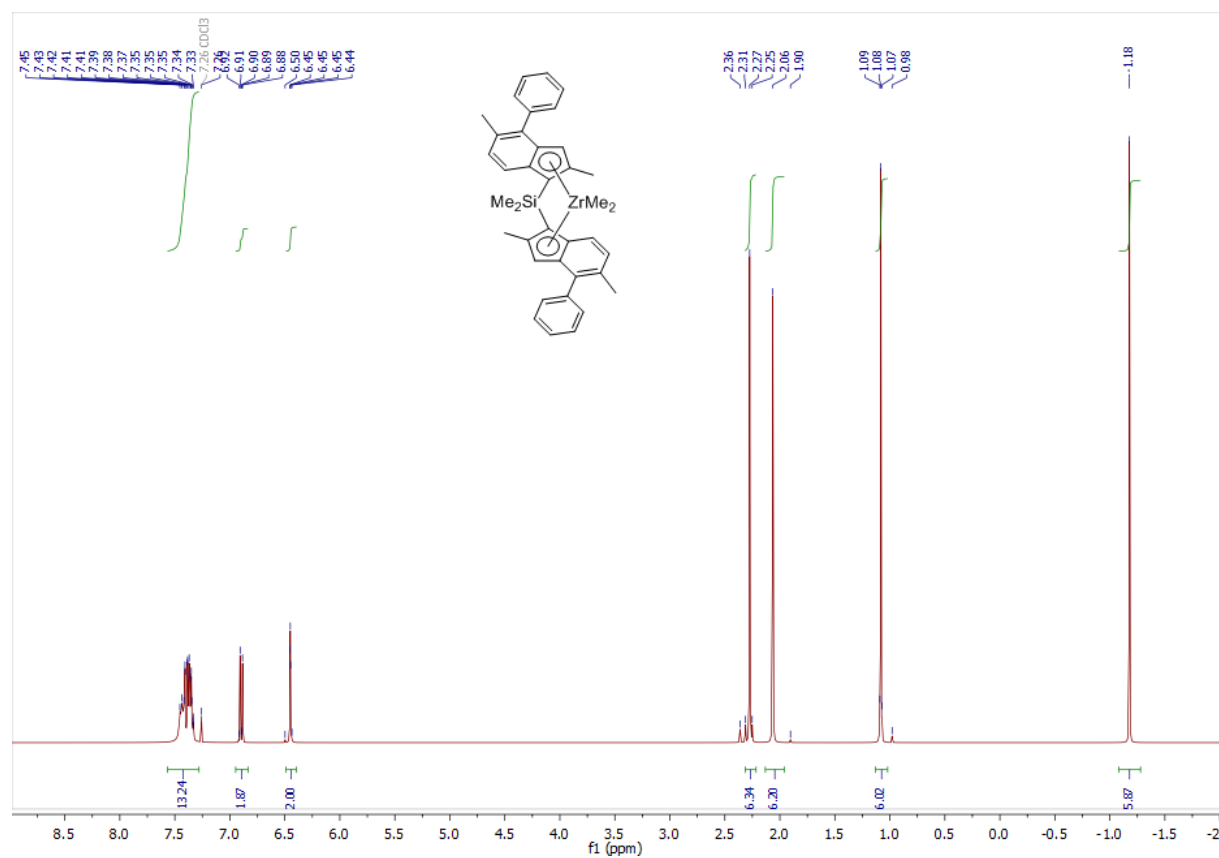

**Figure S1.**  $^1\text{H}$  NMR spectrum of **M20** in  $\text{CDCl}_3$ .



gave 93.0 g (56%) of the product as a yellowish oil. According to  $^1\text{H}$  NMR, the product was a mixture of two diastereomers, A and B, in ~2:1 molar ratio.  $^1\text{H}$  NMR ( $\text{CDCl}_3$ ):  $\delta$  7.75 (d,  $J$  = 7.6 Hz, 1H in A), 7.72 (d,  $J$  = 7.7 Hz, 1H in B), 7.69–7.66 (m, 2H in A and B), 7.25 (m, 1H in A), 7.24 (m, 1H in B), 3.56 (m, 1H in B), 3.04 (qd,  $J$  = 7.0 Hz,  $J$  = 2.1 Hz, 1H in A), 2.83 (m, 1H in B), 2.36 (qd,  $J$  = 7.4 Hz,  $J$  = 2.1 Hz, 1H in A), 1.46 (d,  $J$  = 7.0 Hz, 3H in A), 1.27 (d,  $J$  = 7.4 Hz, 3H in A), 1.26 (d,  $J$  = 7.2 Hz, 3H in B), 1.19 (d,  $J$  = 7.0 Hz, 3H in B).

#### 4-bromo-2,3-dimethyl-1H-indene

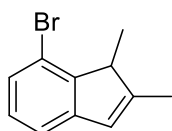

To a suspension of 4.10 g (105 mmol) of  $\text{NaBH}_4$  in 60 ml of methanol 17.2 g (72 mmol) of 4-bromo-2,3-dimethyl-2,3-dihydro-1H-inden-1-one was added at room temperature. The resulting mixture was stirred overnight at room temperature, then poured into 200 ml of water. Crude product was extracted with 3 x 50 ml of ethyl acetate, the combined extract was dried over  $\text{Na}_2\text{SO}_4$  and then evaporated to dryness. The residue was dissolved in 100 ml of toluene, the obtained solution was added in one portion to a hot solution of 0.1 g of TsOH in 400 ml of toluene. The reaction mixture was refluxed for one minute and then poured into 300 ml of aqueous  $\text{Na}_2\text{CO}_3$ . The organic layer was separated, dried over  $\text{Na}_2\text{SO}_4$ , and evaporated to dryness. The product was isolated by flash chromatography on silica gel 60 (40–63  $\mu\text{m}$ , eluent: hexane). This procedure gave 14.7 g (92%) of the product as a colorless oil.  $^1\text{H}$  NMR ( $\text{CDCl}_3$ ):  $\delta$  7.21 (d,  $J$  = 7.8 Hz, 1H), 7.15 (d,  $J$  = 7.3 Hz, 1H), 7.06 (m, 1H), 6.36 (m, 1H), 3.32 (q,  $J$  = 7.4 Hz, 1H), 2.06 (d,  $J$  = 0.9 Hz, 3H), 1.41 (d,  $J$  = 7.4 Hz, 3H).

#### 2,3-dimethyl-4-phenyl-1H-indene

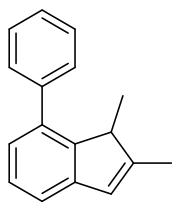

To a solution of 3.90 g (17.5 mmol) of 4-bromo-2,3-dimethyl-1H-indene in 100 ml of 1,4-dioxane 3.20 g (26.2 mmol) of phenylboronic acid, 14.3 g (43.7 mmol) of caesium carbonate, and 50 ml of water were subsequently added. The mixture obtained was purged with argon for 10 min followed by addition of 605 mg (0.523 mmol) of  $\text{Pd}(\text{PPh}_3)_4$ . This mixture was stirred for 12 h at  $90^\circ\text{C}$ , then cooled to room temperature, and diluted with 50 ml of water. The obtained mixture was extracted with dichloromethane (3 x 100 ml). The combined organic extract was dried over  $\text{Na}_2\text{SO}_4$  and then evaporated to dryness. The residue was purified by flash chromatography on silica gel 60 (40–63  $\mu\text{m}$ , eluent: hexane). Yield 3.60 g (94%) of the product as a colorless oil.  $^1\text{H}$  NMR ( $\text{CDCl}_3$ ):  $\delta$  7.39–7.30 (m, 6H), 7.14–7.04 (m, 2H), 3.30 (br.s, 2H), 2.01 (m, 3H), 1.50–1.45 (m, 3H).

#### bis(2,3-dimethyl-4-phenyl-1H-inden-1-yl)dimethylsilane

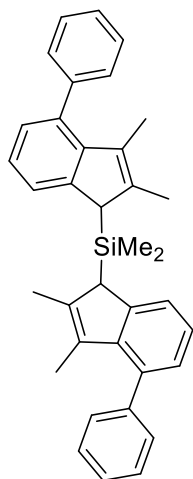

To a solution of 3.50 g (16.0 mmol) of 2,3-dimethyl-4-phenyl-1H-indene in 100 ml of ether 6.40 ml (16.0 mmol) of 2.5 M  $n\text{-BuLi}$  in hexanes was added in one portion at  $-40^\circ\text{C}$ . This mixture was stirred overnight at room temperature, then the resulting light-yellow solution was cooled to  $-80^\circ\text{C}$ , and 50 mg of *N*-methylimidazole was added. The resulting mixture was stirred for 5 min at  $-80^\circ\text{C}$ , then 1.03 g (8.00 mmol) of dichlorodimethylsilane was added in one portion. Further on, this mixture was stirred overnight at ambient temperature, then filtered through a short pad of silica gel 60 (40–63  $\mu\text{m}$ ) which was additionally washed by 2 x 30 ml of dichloromethane. The combined filtrate was evaporated under reduced pressure, and the residue was purified by flash chromatography on silica gel 60 (40–63  $\mu\text{m}$ , eluent: hexane:dichloromethane; 10:1, vol.). Yield 2.30 g (58%) of the product as an orange glassy solid. According to  $^1\text{H}$  NMR spectrum, the product was a mixture of *rac*- and *meso*-isomers in ca. 1:1 molar ratio. Anal. calc. for  $\text{C}_{36}\text{H}_{36}\text{Si}$ : C, 87.04; H, 7.30. Found: C, 86.63; H, 7.36.  $^1\text{H}$  NMR

(CDCl<sub>3</sub>):  $\delta$  7.47–7.24 (m, 24H in *rac* and *meso*), 7.14–7.09 (m, 8H in *rac* and *meso*), 3.71 (s, 2H in *rac* or *meso*), 3.68 (s, 2H in *meso* or *rac*), 2.11 (br.s, 6H in *rac* or *meso*), 2.06 (br.s, 12H in *rac* and *meso*), 1.56 (m, 12H in *rac* and *meso*), –0.21 (s, 3H in *meso*), –0.29 (s, 6H in *rac*), –0.33 (s, 3H in *meso*).

***rac*-dimethylsilanediy[bis( $\eta^5$ -2,3-dimethyl-4-phenyl-inden-1-yl)]zirconium dichloride (M21)**

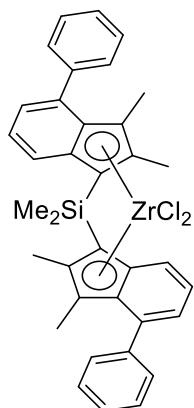

To a cooled to –40 °C solution of 2.30 g (4.63 mmol) of bis(4-phenyl-2,3-dimethyl-1*H*-inden-1-yl)dimethylsilane in 150 ml of ether 3.70 ml (9.26 mmol) of 2.5 M <sup>n</sup>BuLi in hexanes was added in one portion. This mixture was stirred overnight at room temperature, then cooled to –80 °C, and 1.75 g (4.63 mmol) of ZrCl<sub>4</sub>(THF)<sub>2</sub> was added. The reaction mixture was stirred for 24 h, and then evaporated to dryness. The residue was heated with 150 ml of toluene, and the formed hot suspension was filtered through glass frit (G4). The filtrate was evaporated to dryness. This procedure gave 1.57 g of a 2:1 mixture of *rac*- and *meso*-complexes. This crude product was recrystallized for three times from methylcyclohexane/toluene mixture (1:1, vol.) yielding 65 mg (2.1%) of *rac*-complex as an orange powder. *Rac*-zirconocene. Anal. calc. for C<sub>36</sub>H<sub>34</sub>Cl<sub>2</sub>SiZr: C, 65.83;

H, 5.22. Found: C, 65.97; H, 5.45. <sup>1</sup>H NMR (CDCl<sub>3</sub>):  $\delta$  7.62 (dd, *J* = 8.8 Hz, *J* = 0.9 Hz, 2H), 7.62–7.57 (m, 2H), 7.42–7.31 (m, 8H), 7.11 (dd, *J* = 6.8, *J* = 0.9 Hz, 2H), 6.97 (dd, *J* = 8.8, *J* = 6.8 Hz, 2H), 2.02 (s, 6H), 1.69 (s, 6H), 1.36 (s, 6H). <sup>13</sup>C{<sup>1</sup>H} NMR (C<sub>6</sub>D<sub>6</sub>):  $\delta$  141.1, 139.9, 133.7, 131.5, 129.7, 128.6, 127.7, 127.6, 124.8, 124.6, 79.6, 15.8, 14.4, 3.8.

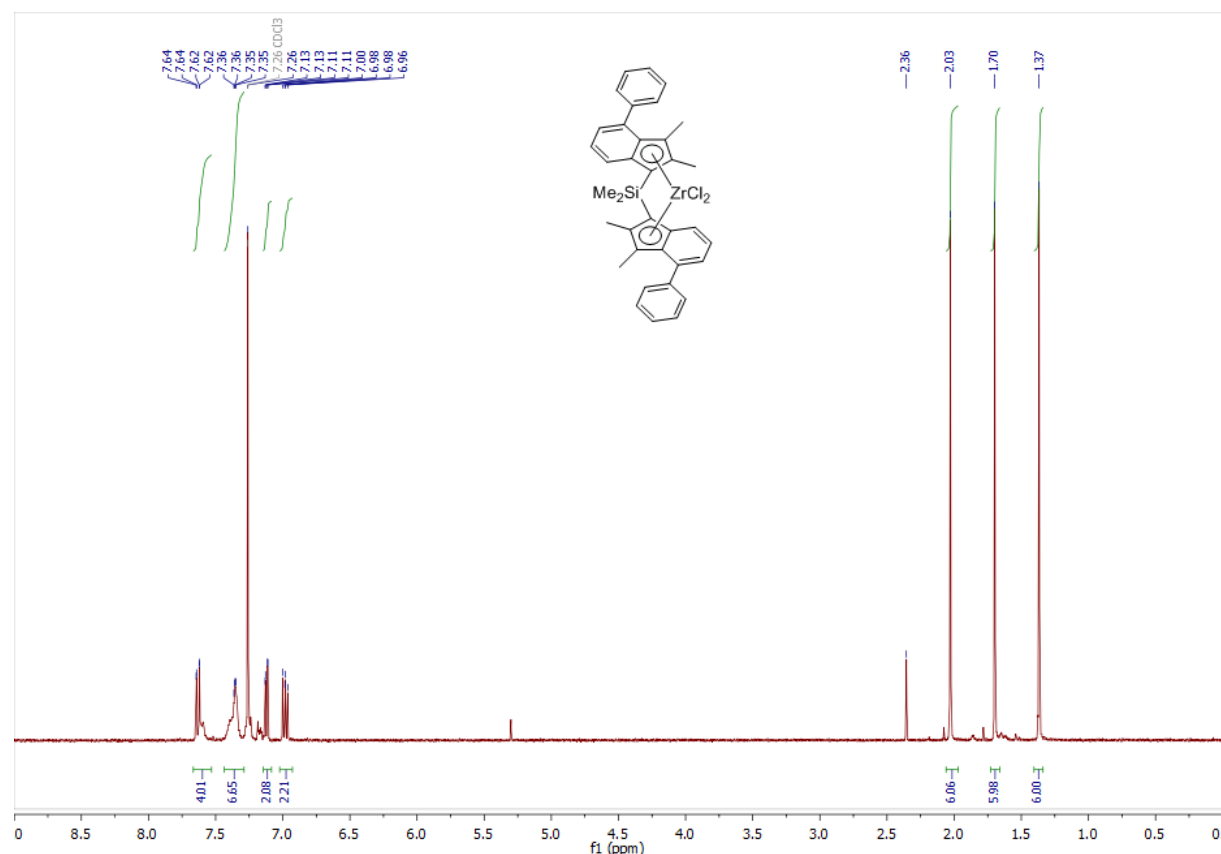

**Figure S3.** <sup>1</sup>H NMR spectrum of **M21** in CDCl<sub>3</sub>. Traces of toluene are visible at 2.36 and 7.13–7.26 ppm.

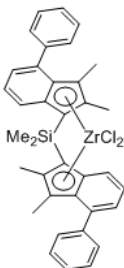

M22

S8



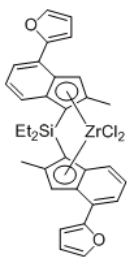

Chemical structure of the catalyst complex is shown above the spectrum. The structure is a ZrCl<sub>2</sub> complex coordinated by two indenyl ligands. One indenyl ligand is substituted with a furan ring and a methyl group. The other indenyl ligand is substituted with a furan ring and an Et<sub>2</sub>SiMe<sub>2</sub> group.

Peak list (ppm):

| Peak (ppm) |
|------------|
| 140.82     |
| 140.23     |
| 139.73     |
| 137.90     |
| 135.10     |
| 133.10     |
| 129.20     |
| 129.07     |
| 128.89     |
| 128.59     |
| 128.57     |
| 128.55     |
| 128.46     |
| 128.41     |
| 128.36     |
| 128.32     |
| 128.30     |
| 128.29     |
| 128.19     |
| 128.14     |
| 128.14     |
| 128.08     |
| 128.06     |
| 128.04     |
| 127.94     |
| 127.90     |
| 127.88     |
| 127.82     |
| 127.80     |
| 127.40     |
| 127.10     |
| 126.30     |
| 125.70     |
| 124.67     |
| 120.58     |
| 120.55     |
| 26.26      |
| 21.42      |
| 16.74      |
| 2.62       |

S9

## M23

**4-phenyl-2,6-dimethyl-1-methoxyindane**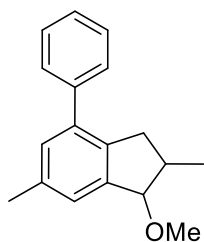

To a mixture of 1.20 g (1.0 mol.%) of  $\text{NiCl}_2(\text{PPh}_3)_2$  and 40.0 g (157 mmol) of 4-bromo-2,6-dimethyl-1-methoxyindane 220 ml (220 mmol) of 1.0 M phenylmagnesium bromide in THF was added at a such rate to maintain a gentle reflux. The resulting solution was refluxed for 40 min, and then cooled to room temperature. Water (500 ml) and dichloromethane (400 ml) were added to the reaction mixture, followed by 500 ml of 2 M HCl. The organic layer was separated, and the aqueous layer was extracted with 2 x 100 ml of dichloromethane. The combined organic extract was evaporated to dryness to give slightly greenish oil. The product was isolated by flash chromatography on silica gel 60 (40–63  $\mu\text{m}$ ; eluent: hexanes-dichloromethane = 5:1, vol., then 1:2, vol.). This procedure gave 38.2 g (97%) of the title product as a colorless thick oil which was a mixture of two diastereomers A and B in 1.5:1 molar ratio.  $^1\text{H}$  NMR ( $\text{CDCl}_3$ ):  $\delta$  7.49–7.41 (m, 4H in A and 4H in B), 7.39–7.32 (m, 1H in A and 1H in B), 7.23 (br.s, 1H in A), 7.22 (br.s, 1H in B), 7.18 (br.s, 1H in B), 7.17 (br.s, 1H in A), 4.56 (d,  $J = 5.7$  Hz, 1H in B), 4.44 (d,  $J = 4.0$  Hz, 1H in A), 3.54 (s, 3H in A), 3.50 (s, 3H in B), 3.33–3.23 (m, 1H in A), 2.93 (dd,  $J = 15.5$  Hz,  $J = 7.1$  Hz, 1H in B), 2.80 (dd,  $J = 15.5$  Hz,  $J = 6.5$  Hz, 1H in B), 2.65–2.45 (m, 2H in A and 1H in B), 2.44 (br.s, 3H in A and 3H in B), 1.16 (d,  $J = 6.9$  Hz, 3H in A) 1.10 (d,  $J = 7.0$  Hz, 3H in B).  $^{13}\text{C}\{^1\text{H}\}$  NMR ( $\text{CDCl}_3$ ):  $\delta$  143.58, 143.10, 140.90, 140.86, 138.43, 138.34, 138.12, 137.66, 136.52, 136.16, 129.50, 129.15, 128.47, 128.17, 126.82, 124.83, 124.80, 91.34, 86.15, 56.84, 56.68, 40.11, 39.04, 37.94, 37.80, 21.24, 19.16, 13.50.

**2,5-dimethyl-7-phenyl-1H-indene**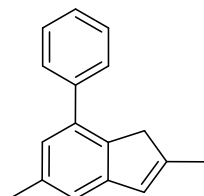

To a solution of 38.2 g (151 mmol) of 4-phenyl-2,6-dimethyl-1-methoxyindane in 350 ml of toluene 400 mg of TsOH was added. The resulting solution was refluxed using Dean-Stark head for 10 min, then cooled to room temperature, and finally washed by 100 ml of 10%  $\text{K}_2\text{CO}_3$ . The organic layer was separated, and the aqueous layer was extracted with 2 x 100 ml of dichloromethane. The combined organic extract was evaporated to dryness, and the resulting greenish solid was heated with 400 ml of n-hexane. This hot mixture was filtered through a short pad of silica gel 60 (40–63  $\mu\text{m}$ ), and the filtrate was kept for 5 h at room temperature, then 1 h at 0  $^\circ\text{C}$ , and finally 2 h at -30  $^\circ\text{C}$ . Precipitated large crystals were filtered off, washed with 200 of cold (0  $^\circ\text{C}$ ) n-hexane and dried in vacuum to give 27.9 g (84%) of 2,5-dimethyl-7-phenyl-1H-indene.  $^1\text{H}$  NMR ( $\text{CDCl}_3$ ):  $\delta$  7.55–7.49 (m, 2H), 7.46–7.38 (m, 2H), 7.37–7.29 (m, 1H), 7.07 (s, 1H), 6.96 (s, 1H), 6.48 (m, 1H), 3.33 (s, 2H), 2.41 (s, 3H), 2.12 (s, 3H).  $^{13}\text{C}\{^1\text{H}\}$  NMR ( $\text{CDCl}_3$ ):  $\delta$  146.74, 146.59, 141.44, 137.89, 136.99, 136.56, 128.38, 128.31, 127.01, 126.90, 125.02, 119.74, 42.37, 21.42, 16.76.

### bis(2,6-dimethyl-4-phenyl-1H-inden-1-yl)(dimethyl)silane

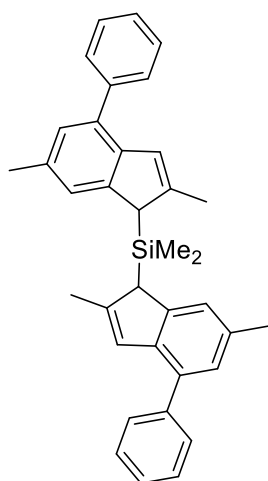

To a solution of 10.5 g (47.7 mmol) of 2,5-dimethyl-7-phenyl-1*H*-indene in 250 ml of ether and 7.5 ml of THF 19.6 ml (47.6 mmol) of 2.43 M *n*BuLi in hexanes was added in one portion at -50 °C. This mixture was stirred for 4 h at room temperature, then the resulting heterogeneous mixture was cooled to -40°C, and 250 mg of CuCN was added. The obtained mixture was stirred for 30 min at -25 °C followed by addition of 3.08 g (23.9 mmol) of dichlorodimethylsilane. Further on, this mixture was stirred overnight at ambient temperature. The resulting mixture was filtered through a short pad of silica gel 60 (40-63 μm) which was additionally washed by 2 x 50 ml of dichloromethane. The combined filtrate was evaporated in vacuum, and thus obtained residue was dried in vacuum. This procedure gave 12.0 g (ca. 100%) of the title product (ca. 80% purity by NMR) as yellowish glassy solid, which was used further without additional purification. According to <sup>1</sup>H NMR, the product

was a 1.5:1 mixture of *meso*- and *rac*-isomers. HRMS: [M]<sup>+</sup> calc. for C<sub>36</sub>H<sub>36</sub>Si: 496.2586; found: 496.2571. <sup>1</sup>H NMR (CDCl<sub>3</sub>): δ 7.55–7.52 (m, 4H in *rac* and 4H in *meso*), 7.47–7.42 (m, 4H in *rac* and 4H in *meso*), 7.37–7.31 (m, 2H in *rac* and 2H in *meso*), 7.22 (br.s, 2H in *meso*), 7.18 (br.s, 2H in *rac*), 7.11 (br.s, 2H in *meso*), 7.09 (br.s, 2H in *rac*), 6.76 (br.s, 2H in *rac* and 2H in *meso*), 3.76 (s, 2H in *rac*), 3.73 (s, 2H in *meso*), 2.412 (s, 6H in *meso*), 2.407 (s, 6H in *rac*), 2.24 (s, 6H in *rac*), 2.17 (s, 6H in *meso*), -0.16 (s, 3H in *meso*), -0.18 (s, 6H in *rac*), -0.20 (s, 3H in *meso*). <sup>13</sup>C{<sup>1</sup>H} NMR (CDCl<sub>3</sub>): δ 146.56, 146.48, 145.97, 145.89, 141.43, 140.45, 133.74, 133.7, 132.56, 132.45, 128.86, 128.3, 126.64, 126.5, 125.74, 125.7, 123.11, 47.27, 47.23, 21.6, 17.99, 17.92, -5.50, -5.55, -5.8.

### *rac*-dimethylsilanediyl-bis(η<sup>5</sup>-2,6-dimethyl-4-phenylinden-1-yl)zirconium dichloride (M23)

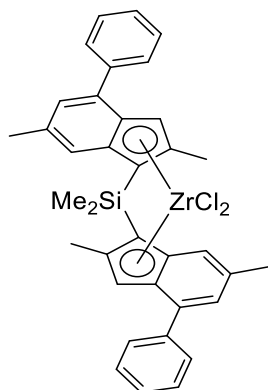

To a solution of 12.0 g (23.8 mmol) of bis(2,6-dimethyl-4-phenyl-1*H*-inden-1-yl)(dimethyl)silane in 250 ml of ether 19.6 ml (47.6 mmol) of 2.43 M *n*BuLi in hexanes was added in one portion at -50 °C. This mixture was stirred overnight at room temperature, then it was cooled to -60 °C, and 5.56 g (23.9 mmol) of ZrCl<sub>4</sub> was added. The reaction mixture was stirred for 24 h and then evaporated to dryness in vacuum. The residue was taken up in 250 ml of toluene, and thus obtained suspension was filtered while hot through glass frit (G4). On the evidence of NMR spectroscopy, the filtrate consisted of a mixture of *rac*- and *meso*-zirconocenes (~1:1.1 molar ratio). The filtrate was evaporated to ca. 200 ml.

The orange crystalline solid precipitated overnight at room temperature was filtered off (G3) and then dried in vacuum. This procedure gave 2.85 g (18.2%) of *meso*-dimethylsilanediyl-bis(η<sup>5</sup>-2,6-dimethyl-4-phenylinden-1-yl)zirconium dichloride, containing ~5% of *rac*-isomer. The mother liquor was evaporated to ca. 90 ml and allowed to stand for 45 min at room temperature. The precipitated yellow solid was filtered off (G3) and dried in vacuum. This procedure gave 1.00 g (6.4%) of *rac*-complex contaminated with 1% of *meso*-isomer. The mother liquor was allowed to stand overnight at room temperature. The precipitated orange solid was filtered off (G3) and then dried in vacuum. This procedure gave 2.30 g (14.7%) of a mixture of *rac*- and *meso*-zirconocenes in ratio ca. 56/44. The mother liquor was evaporated again to ca. 50 ml and allowed to stand overnight at room temperature. The precipitated yellow solid was filtered off (G3) and dried in vacuum. This procedure gave 0.85 g (5.4%) of *rac*-complex contaminated with 5% of *meso*-isomer. Finally, the mother liquor was evaporated to ca. 15 ml, and 50 ml of *n*-pentane was added. The precipitated orange solid was

filtered off (G3) and dried in vacuum to give 5.70 g (36.4%) of a slightly dirty mixture of *rac*- and *meso*-zirconocenes in ratio ca. 60/40. Thus, the total yield of *rac*- and *meso*-zirconocenes isolated in this synthesis was 12.7 g (81%). *Rac*-complex. Anal. calc. for  $C_{36}H_{34}Cl_2SiZr$ : C, 65.83; H, 5.22. Found: C, 65.95; H, 5.40.  $^1H$  NMR ( $CDCl_3$ ):  $\delta$  7.62 (d,  $J = 7.3$  Hz, 2H), 7.41 (dd,  $J = 7.3$  Hz, 2H), 7.32 (t,  $J = 7.3$  Hz, 1H), 7.22 (s, 1H), 6.90 (s, 1H), 2.37 (s, 3H), 2.23 (s, 3H), 1.32 (s, 3H).  $^{13}C\{^1H\}$  NMR ( $CDCl_3$ ):  $\delta$  139.50, 138.23, 135.74, 134.80, 130.51, 129.17, 128.56 (two resonances), 128.15, 127.61, 122.76, 121.92, 82.41, 22.14, 18.35, 2.79.

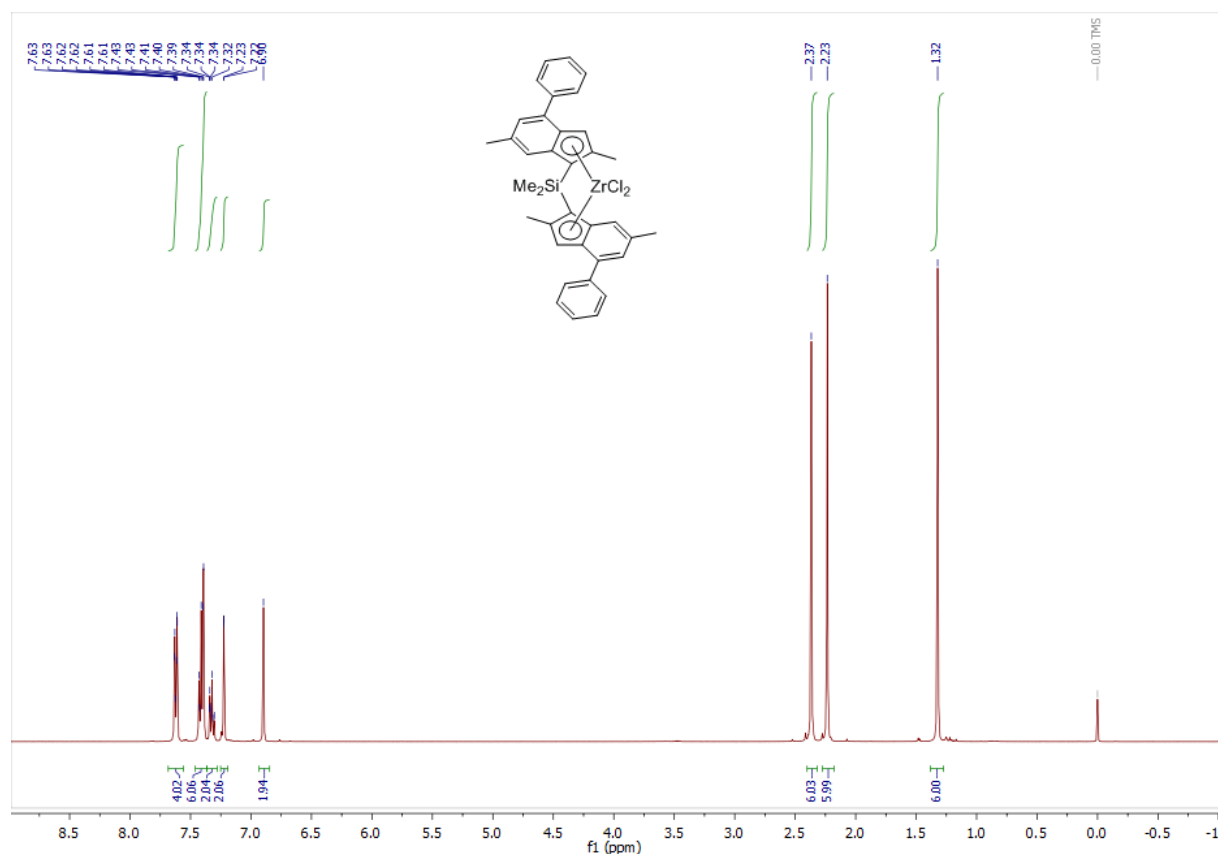

**Figure S7.**  $^1H$  NMR spectrum of **M23** in  $CDCl_3$ .

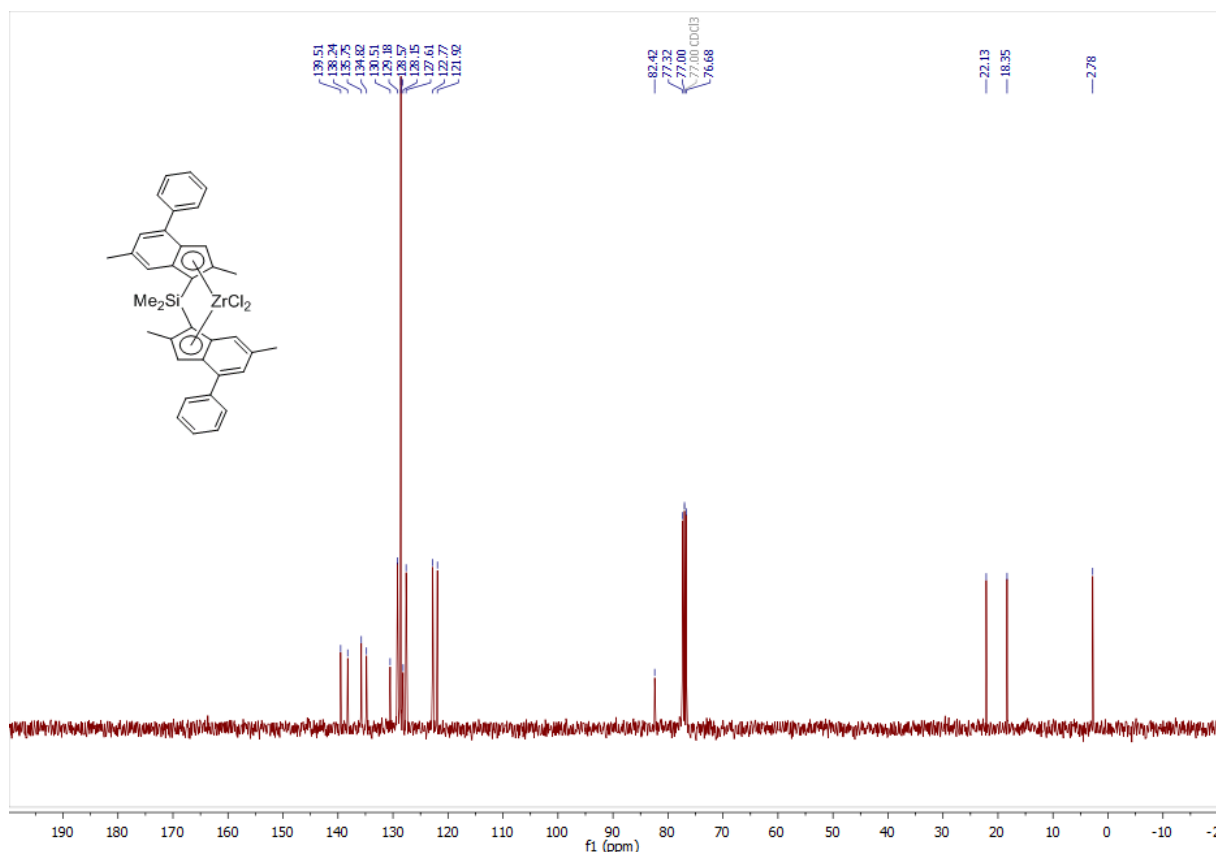

**Figure S8.**  $^{13}\text{C}\{^1\text{H}\}$  NMR spectrum of **M23** in  $\text{CDCl}_3$ .

## M24

### 6-isopropyl-4-phenyl-2-methyl-1-methoxyindane

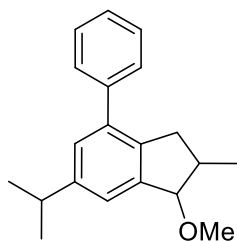

To a mixture of 1.10 g (1.0 mol.%) of  $\text{NiCl}_2(\text{PPh}_3)_2$  and 38.8 g (137.1 mmol) of 4-bromo-1-methoxy-6-isopropyl-2-methylindane 200 ml (200 mmol) of 1.0 M phenylmagnesium bromide in THF was added at a such rate to maintain a gentle reflux. The resulting solution was refluxed for 1h, then cooled to room temperature. 500 ml of water and 500 ml of dichloromethane were added to the reaction mixture, followed by 500 ml of 1 M HCl. The organic layer was separated, and the aqueous layer was extracted with 250 ml of dichloromethane. The

combined organic extract was evaporated to dryness to give a slightly greenish oil. The product was isolated by flash-chromatography on silica gel 60 (40-63  $\mu\text{m}$ ; eluent: hexanes-dichloromethane = 1:2, vol.). This procedure gave 37.9 g (99%) of the title product as a colorless thick oil which is a mixture of two diastereomers A and B in 1.2:1 molar ratio.  $^1\text{H}$  NMR ( $\text{CDCl}_3$ ):  $\delta$  7.47–3.38 (m, 4H in A and 4H in B), 7.35–7.29 (m, 1H in A and 1H in B), 7.24 (m, 1H in A and 1H in B), 7.18 (m, 1H in A and 1H in B), 4.54 (d,  $J$  = 5.7 Hz, 1H in B), d, ( $J$  = 4.2 Hz, 1H in A), 3.52 (s, 3H in A), 3.47 (s, 3H in B), 3.29–3.19 (m, 1H in A), 2.97 (sept, 1H in A and 1H in B), 2.91 (dd,  $J$  = 15.5 Hz,  $J$  = 7.1 Hz, 1H in B), 2.77 (dd,  $J$  = 15.5 Hz,  $J$  = 6.5 Hz, 1H in B), 2.58 (m, 1H in B), 2.53–2.43 (m, 2H in A), 1.29 (d,  $J$  = 6.9 Hz, 6H in A and 6H in B), 1.14 (d,  $J$  = 6.7 Hz, 3H in A), (d,  $J$  = 6.9 Hz, 3H in B).  $^{13}\text{C}\{^1\text{H}\}$  NMR ( $\text{CDCl}_3$ ):  $\delta$  147.79, 147.49, 143.50, 143.07, 141.10 (two resonances), 138.53, 138.36, 138.35, 137.98, 128.55, 128.49, 128.19, 128.16, 127.03, 126.81, 126.79, 126.74, 122.12, 122.07, 91.41, 86.28, 56.88, 56.64, 40.17, 38.98, 37.98, 37.84, 34.03, 34.07, 24.08, 24.30, 24.28, 24.14, 19.22, 13.58.

### 5-isopropyl-2-methyl-7-phenyl-1H-indene

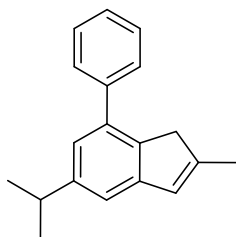

To a solution of 37.9 g (135.2 mmol) of 6-isopropyl-4-phenyl-2-methyl-1-methoxyindane in 350 ml of toluene 250 mg of TsOH was added. The resulting solution was refluxed using Dean-Stark head for 10 min, then, additional 100 mg of TsOH was added, and the reaction mixture was refluxed using Dean-Stark head for another 10 min. Then, it was cooled to room temperature and washed by 100 ml of 10% K<sub>2</sub>CO<sub>3</sub>. The organic layer was separated, and the aqueous layer was extracted with 2 x 100 ml of dichloromethane. The combined organic extract was

evaporated to dryness. The resulting oil was dissolved in 150 ml of n-hexane. This solution was filtered through a short pad of silica gel 60 (40-63  $\mu$ m), which was washed additionally with 2 x 50 ml of n-hexane. The filtrate was evaporated, and the residue was dried in vacuum to give 30.3 g (90%) of the title product. <sup>1</sup>H NMR (CDCl<sub>3</sub>):  $\delta$  7.53 (dm,  $J$  = 7.3 Hz, 2H), 7.42 (dd,  $J$  = 7.3 Hz, 2H), 7.32 (tm,  $J$  = 7.3 Hz, 1H), 7.13 (s, 1H), 7.01 (s, 1H), 6.49 (s, 1H), 3.33 (s, 2H), 2.96 (sept,  $J$  = 6.9 Hz, 1H), 2.11 (s, 3H), 1.30 (d,  $J$  = 6.9 Hz, 1H). <sup>13</sup>C{<sup>1</sup>H} NMR (CDCl<sub>3</sub>):  $\delta$  147.97, 146.69, 146.50, 141.63, 138.35, 137.05, 128.42, 128.32, 127.16, 126.89, 122.63, 117.04, 42.41, 34.24, 24.33, 16.74.

### bis(6-isopropyl-2-methyl-4-phenyl-1H-inden-1-yl)(dimethyl)silane

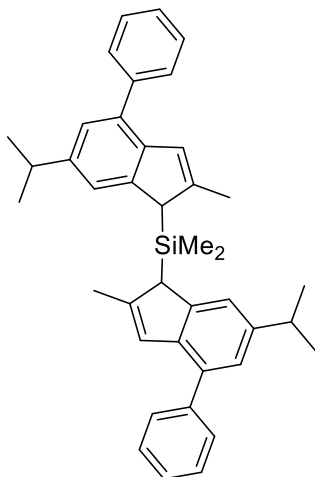

To a solution of 12.9 g (51.9 mmol) of 5-isopropyl-2-methyl-7-phenyl-1H-indene in 250 ml of ether and 11 ml of THF 21.4 ml (52.0 mmol) of 2.43 M <sup>n</sup>BuLi in hexanes was added in one portion at -50 °C. This mixture was stirred for 5 h at room temperature, then the resulting heterogeneous light-orange solution with a lot of white precipitate was cooled to -60°C, and 3.35 g (26.0 mmol) of dichlorodimethylsilane was added in one portion.

Further on, this mixture was stirred overnight at ambient temperature. The resulting mixture was filtered through a short pad of silica gel 60 (40-63  $\mu$ m) which was additionally washed by 2 x 50 ml of dichloromethane. The combined filtrate was evaporated under reduced pressure. The product was isolated by flash-chromatography on silica gel 60 (40-63  $\mu$ m; eluent: hexanes-dichloromethane = 10:1, vol., then 3:1, vol.).

This procedure gave 12.34 g (86%) of the title product (ca. 90% purity by NMR, ~1.3:1 mixture of *meso*- and *rac*- isomers) as yellowish glass, which was used further without additional purification. HRMS: [M]<sup>+</sup> calc. for C<sub>40</sub>H<sub>44</sub>Si: 552.3212; found: 552.3224. <sup>1</sup>H NMR (CDCl<sub>3</sub>):  $\delta$  7.59–7.51 (m, 4H in *meso* and *rac*), 7.50–7.43 (m, 4H in *meso* and *rac*), 7.39–7.33 and 7.26 (m and br.s, respectively, sum 4H in *meso* and *rac*), 7.15 (m, 2H in *meso* and *rac*), 7.13 (2s), 6.78 (s, 2H in *meso*), 6.74 (s, 2H in *rac*), 3.74 (s, 2H in *meso*), 3.71 (s, 2H in *rac*), 2.97 (sept,  $J$  = 6.9 Hz, 2H in *meso* and 2H in *rac*), 2.23 (br.s, 6H in *meso*), 2.15 (br.s, 6H in *rac*), 1.30 (d,  $J$  = 6.9 Hz, 12H in *meso*), 1.28 (d,  $J$  = 6.9 Hz, 12H in *rac*), -0.13 (s, 3H in *meso*), -0.14 (s, 6H in *rac*), -0.20 (s, 3H in *meso*). <sup>13</sup>C{<sup>1</sup>H} NMR (CDCl<sub>3</sub>):  $\delta$  147.02, 146.76, 145.92, 145.87, 143.95, 141.70, 141.66, 140.88, 140.79, 133.73, 128.95, 128.36, 126.67, 125.74, 125.67, 124.15, 124.07, 120.45, 47.53, 47.40, 34.21, 24.61, 24.52, 24.38, 24.27, 17.98, 17.92, -5.13, -5.24.

***rac*-dimethylsilanediylbis[ $\eta^5$ -6-isopropyl-2-methyl-4-phenylinden-1-yl]zirconium dichloride (M24)**

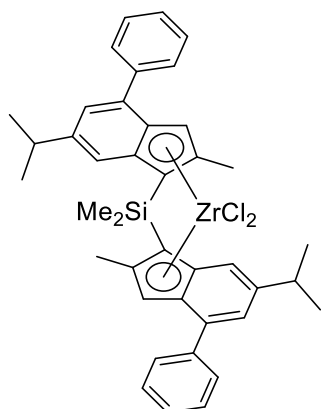

To a cooled to -50 °C solution of 12.3 g (22.3 mmol) of bis(6-isopropyl-2-methyl-4-phenyl-1*H*-inden-1-yl)(dimethyl)silane in 250 ml of ether 18.4 ml (44.7 mmol) of 2.43 M <sup>n</sup>BuLi in hexanes was added in one portion. This mixture was stirred overnight at room temperature. The resulting dark-red solution was cooled to -60 °C, and 5.21 g (22.4 mmol) of ZrCl<sub>4</sub> was added. The reaction mixture was stirred for 24 h resulting in dark-red solution with little sediment. This mixture was evaporated to dryness, and the residue was heated with 100 ml of toluene. The obtained hot suspension was filtered through glass frit (G4). The filtrate was evaporated to ca. 20 ml, heated to ca. 60 °C, and 25 ml of n-hexane was added. Yellow solid precipitated from this solution overnight at room temperature was filtered off (G3) and then dried in vacuum. This

procedure gave 3.30 g (21%) of *rac*-complex. The mother liquor was evaporated to dryness, and the residue was recrystallized from a mixture of 10 ml of toluene and 25 ml of n-hexane to give 2.50 g (16%) of *meso*-complex. *Rac*-complex. Anal. calc. for C<sub>40</sub>H<sub>42</sub>Cl<sub>2</sub>SiZr: C, 67.38; H, 5.94. Found: C, 67.51; H, 6.02. <sup>1</sup>H NMR (CDCl<sub>3</sub>): δ 7.63 (dm, *J* = 7.3 Hz, 2H), 7.44 (s, 1H), 7.41 (dd, *J* = 7.3 Hz, 2H), 7.32 (tt, *J* = 7.3 Hz, 1H), 7.28 (d, *J* = 1.0 Hz, 1H), 6.90 (s, 1H), 2.92 (sept, *J* = 6.9 Hz, 1H), 2.26 (s, 3H), 1.33 (s, 3H), 1.25 (d, *J* = 6.9 Hz, 6H). <sup>13</sup>C{<sup>1</sup>H} NMR (CDCl<sub>3</sub>): δ 146.40, 139.73, 138.36, 134.91, 130.94, 128.57 (two resonances), 127.94, 127.59, 127.43, 121.84, 120.03, 82.43, 34.55, 23.49, 23.36, 18.51, 2.79.

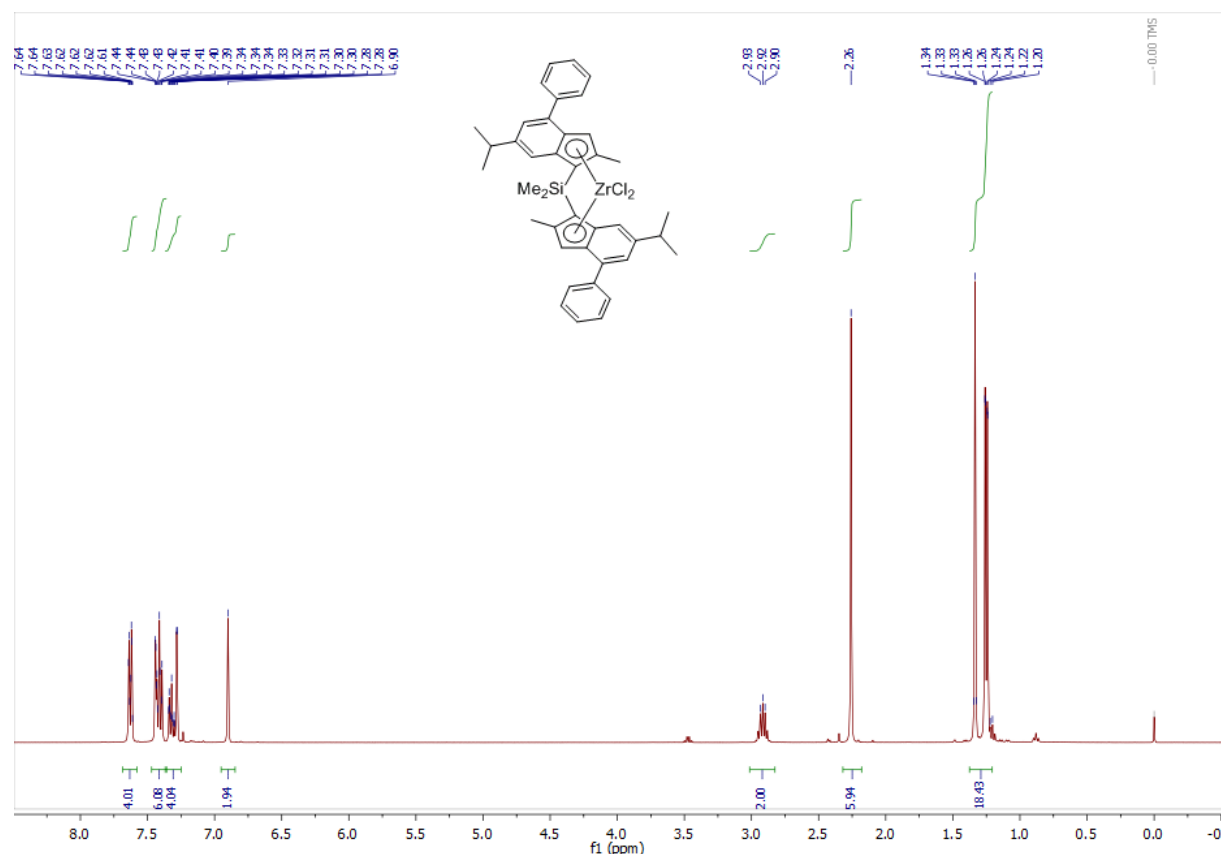

**Figure S9.** <sup>1</sup>H NMR spectrum of **M24** in CDCl<sub>3</sub>.

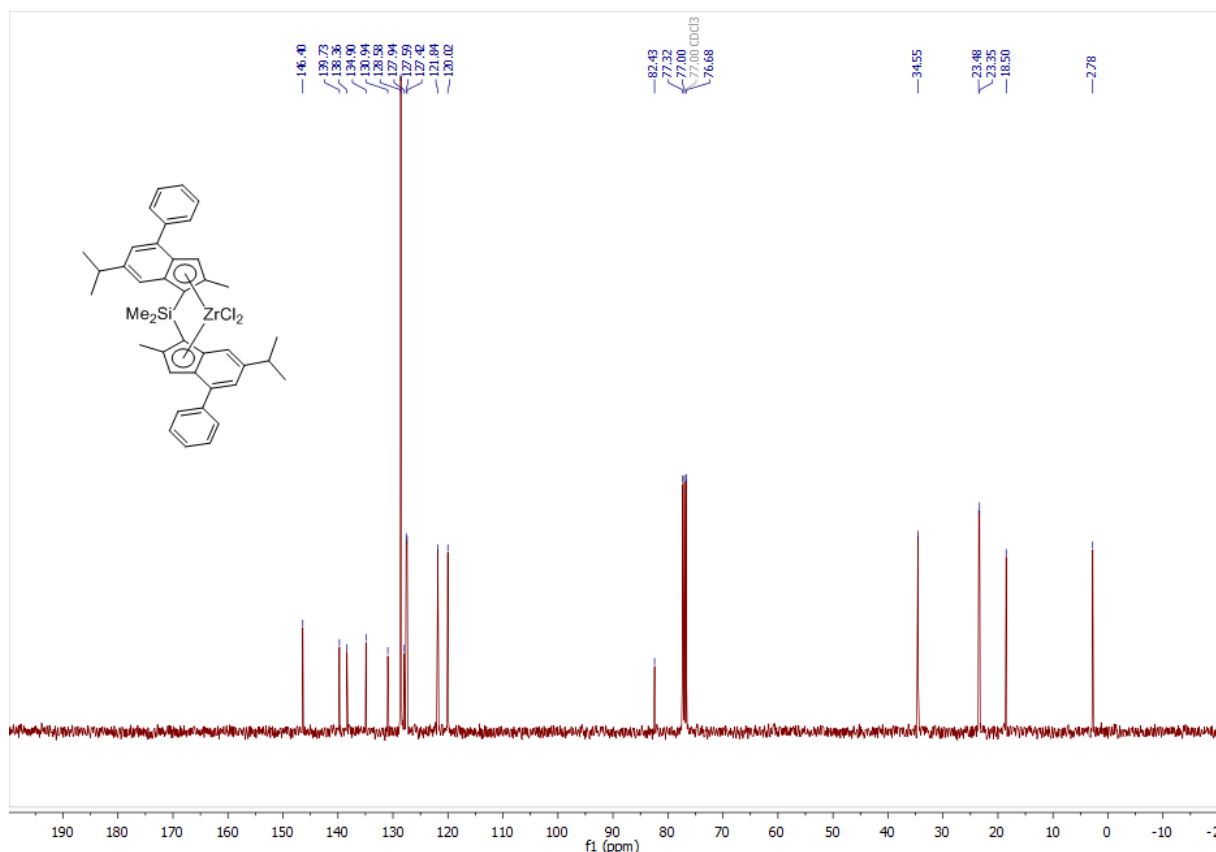

**Figure S10.**  $^{13}\text{C}\{^1\text{H}\}$  NMR spectrum of **M24** in  $\text{CDCl}_3$ .

## M25

### 6-*tert*-butyl-4-phenyl-2-methyl-1-methoxyindane

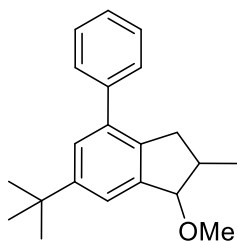

To a mixture of 1.2 g (1.0 mol.%) of  $\text{NiCl}_2(\text{PPh}_3)_2$  and 45.2 g (152 mmol) of 4-bromo-1-methoxy-6-*tert*-butyl-2-methylindane 220 ml (220 mmol) of 1.0 M phenylmagnesium bromide in THF was added at a such rate to maintain a gentle reflux. The resulting solution was refluxed for 40 min, then cooled to room temperature. 500 ml of water and 500 ml of dichloromethane were added to the reaction mixture followed by 500 ml of 1 M HCl. The organic layer was separated, and the aqueous layer was extracted with 250 ml of dichloromethane. The

combined organic extract was evaporated to dryness to give a slightly greenish oil. The product was isolated by flash-chromatography on silica gel 60 (40–63  $\mu\text{m}$ ; eluent: hexanes-dichloromethane = 5:1, vol., then 1:2, vol.). This procedure gave 44.0 g (98%) of the title product as a colorless thick oil which was a mixture of two diastereomers A and B in 1.3:1 molar ratio.  $^1\text{H}$  NMR ( $\text{CDCl}_3$ ):  $\delta$  7.46–7.29 (m, 7H in A and B), 4.55 (d,  $J$  = 5.7 Hz, 1H in B), 4.44 (d,  $J$  = 4.3 Hz, 1H in A), 3.51 (s, 3H in A), 3.47 (s, 3H in B), 3.30–3.19 (1H in A), 2.90 (dd,  $J$  = 15.5 Hz,  $J$  = 7.1 Hz, 1H in B), 2.76 (dd,  $J$  = 15.5 Hz,  $J$  = 6.5 Hz, 1H in B), 2.64–2.42 (m, 2H in A and 1H in B), 1.37 (s, 9H in A or B), 1.36 (s, 9H in B or A), 1.14 (d,  $J$  = 6.9 Hz, 3H in A), 1.07 (d,  $J$  = 6.9 Hz, 3H in B).  $^{13}\text{C}\{^1\text{H}\}$  NMR ( $\text{CDCl}_3$ ):  $\delta$  150.13, 149.78, 143.22, 142.78, 141.36, 141.32, 138.16, 138.03, 137.65, 128.57, 128.20, 126.80, 126.03, 125.69, 121.05, 121.01, 91.54, 86.40, 56.87, 56.58, 40.13, 38.97, 37.94, 37.77, 34.66, 31.57, 19.30, 13.60.



### 5-*tert*-butyl-2-methyl-7-phenyl-1H-indene

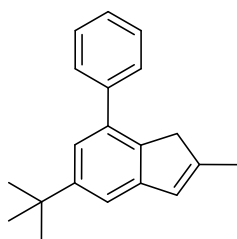

To a solution of 44.0 g (149 mmol) of 6-*tert*-butyl-4-phenyl-2-methyl-1-methoxyindane in 300 ml of toluene 300 mg of TsOH was added. The resulting solution was refluxed using Dean-Stark head for 10 min, then additional 300 mg of TsOH was added, and the formed mixture was refluxed using Dean-Stark head for another 10 min. Then, it was cooled to room temperature and finally washed by 100 ml of 10% K<sub>2</sub>CO<sub>3</sub>. The organic layer was separated, and the aqueous layer was extracted with 150 ml of dichloromethane. The combined organic extract was

evaporated to dryness. The obtained oil was dissolved in 200 ml of n-hexane. This solution was filtered through a short pad of silica gel 60 (40-63  $\mu$ m), which was washed additionally with 2 x 50 ml of n-hexane. The filtrate was evaporated to dryness, and the residue was dried in vacuum to give 38.0 g (97%) of the title product as yellowish oily liquid. <sup>1</sup>H NMR (CDCl<sub>3</sub>):  $\delta$  7.54 (d, *J* = 7.3 Hz, 2H), 7.43 (dd, *J* = 7.3 Hz, 2H), 7.36–7.29 (m, 2H), 7.17 (d, *J* = 1.3 Hz, 1H), 6.51 (s, 1H), 3.33 (s, 2H), 2.11 (s, 3H), 1.37 (s, 9H). <sup>13</sup>C{<sup>1</sup>H} NMR (CDCl<sub>3</sub>):  $\delta$  150.24, 146.48, 146.41, 141.85, 138.01, 136.72, 128.46, 128.34, 127.31, 126.90, 121.50, 116.15, 42.36, 34.74, 31.68, 16.76.

### bis(6-*tert*-butyl-2-methyl-4-phenyl-1H-inden-1-yl)(dimethyl)silane

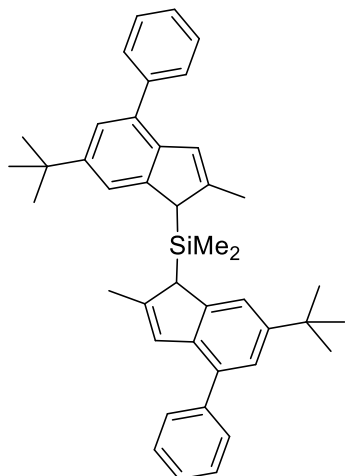

To a solution of 13.8 g (52.7 mmol) of 5-*tert*-butyl-2-methyl-7-phenyl-1H-indene in 250 ml of ether and 7.5 ml of THF 21.7 ml (52.7 mmol) of 2.43 M <sup>n</sup>BuLi in hexanes was added in one portion at -60 °C. This mixture was stirred for 4 h at room temperature, then the obtained suspension was cooled to -40 °C, and 250 mg of CuCN was added. This mixture was stirred for 30 min at -25 °C followed by addition of 3.41 g (26.4 mmol) of dichlorodimethylsilane. Further on, this mixture was stirred overnight at ambient temperature. The resulting mixture was filtered through a short pad of silica gel 60 (40-63  $\mu$ m) which was additionally washed by 2 x 50 ml of dichloromethane. The combined filtrate was evaporated under reduced pressure, and the residue was dried in vacuum at elevated temperature. This procedure gave 15.3 g (~100%) of the

title product (ca. 90% purity by NMR, ~2:1 mixture of *rac* and *meso* isomers) as yellowish glassy solid, which was used further without additional purification. HRMS: [M]<sup>+</sup> calc. for C<sub>42</sub>H<sub>48</sub>Si: 580.3525; found: 580.3538. <sup>1</sup>H NMR (CDCl<sub>3</sub>):  $\delta$  7.61–7.28 (m, 14H in *rac* and *meso*), 6.77 (br.s, 2H in *meso*), 6.72 (br.s, 2H in *rac*), 3.73 (br.s, 2H in *meso*), 3.72 (br.s, 2H in *rac*), 2.21 (br.s, 3H in *meso*), 2.11 (br.s, 3H in *rac*), 1.37 (s, 9H in *rac*), 1.36 (s, 9H in *meso*), -0.13 (s, 3H in *meso*), -0.14 (s, 6H in *rac*) and -0.19 (s, 3H in *meso*). <sup>13</sup>C{<sup>1</sup>H} NMR (CDCl<sub>3</sub>):  $\delta$  147.25, 146.94, 146.12, 145.62, 145.51, 141.88, 141.83, 140.46, 140.30, 133.31, 133.26, 128.93, 128.33, 126.62, 125.61, 125.54, 122.74, 119.64, 119.48, 47.60, 47.43, 34.65, 31.74, 17.93, 17.87, -5.12, -5.34.

***rac*-dimethylsilanediylbis( $\eta^5$ -6-*tert*-butyl-2-methyl-4-phenylinden-1-yl)zirconium dichloride (M25)**

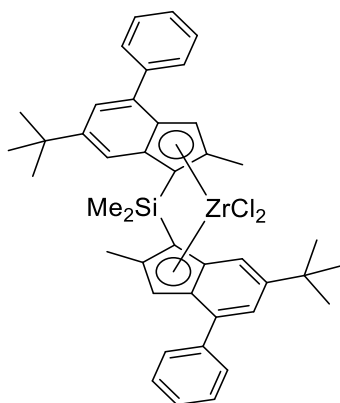

To a cooled to  $-60\text{ }^{\circ}\text{C}$  solution of 15.3 g (26.4 mmol) of bis(6-*tert*-butyl-2-methyl-4-phenyl-1*H*-inden-1-yl)(dimethyl)silane in 250 ml of ether 21.7 ml (52.7 mmol) of 2.43 M  $n\text{-BuLi}$  in hexanes was added in one portion. This mixture was stirred overnight at room temperature. The resulting red solution was cooled to  $-60\text{ }^{\circ}\text{C}$ , and 6.15 g (26.39 mmol) of  $\text{ZrCl}_4$  was added. Thus obtained mixture was stirred for 24 h giving red suspension. On the evidence of NMR spectroscopy, the precipitate is almost pure *rac*-zirconocene (in a mixture with  $\text{LiCl}$ ), while the solution includes ca. 35 to 65 mixture of *rac*- and *meso*-zirconocenes. The precipitate was filtered off (G4), then poured into 100 ml of hot toluene, and thus obtained hot suspension was filtered through glass

frit (G4). The filtrate was evaporated to ca. 60 ml. Orange crystals precipitated overnight at room temperature were filtered off and dried in vacuum. This procedure gave 4.00 g (21%) of *rac*-dimethylsilanediyl-bis( $\eta^5$ -6-*tert*-butyl-2-methyl-4-phenylinden-1-yl)zirconium dichloride. The mother liquor was recrystallized from ca. 20 ml of toluene to give 2.80 g (14%) of *rac*-complex as orange crystalline solid. The filtrate originated from filtration of the original reaction mixture was evaporated to ca. 30 ml, and 100 ml of *n*-hexane was added. Yellow solid precipitated from this mixture at room temperature was filtered off (G3) and dried in vacuum to give 5.20 g (27%) of a ca. 3:7 mixture of *rac*- and *meso*-zirconocenes. Thus, the total yield of *rac*- and *meso*-zirconocenes isolated in this synthesis was 12.0 g (61%). *Rac*-zirconocene. Anal. calc. for  $\text{C}_{42}\text{H}_{46}\text{Cl}_2\text{SiZr}$ : C, 68.07; H, 6.26. Found: C, 68.18; H, 6.34.  $^1\text{H}$  NMR ( $\text{CDCl}_3$ ):  $\delta$  7.63 (dm,  $J = 7.3$  Hz, 2H), 7.58 (s, 1H), 7.47 (d,  $J = 1.1$  Hz, 1H), 7.42 (dd,  $J = 7.3$  Hz, 2H), 7.33 (tm,  $J = 7.3$  Hz, 1H), 6.89 (s, 1H), 2.27 (s, 3H), 1.34 (s, 3H), 1.33 (s, 9H).  $^{13}\text{C}\{^1\text{H}\}$  NMR ( $\text{CDCl}_3$ ):  $\delta$  148.45, 139.94, 137.95, 134.92, 130.55, 128.58 (two resonances), 127.57, 126.44, 121.61, 118.78, 82.74, 35.10, 30.75, 18.53, 2.71.

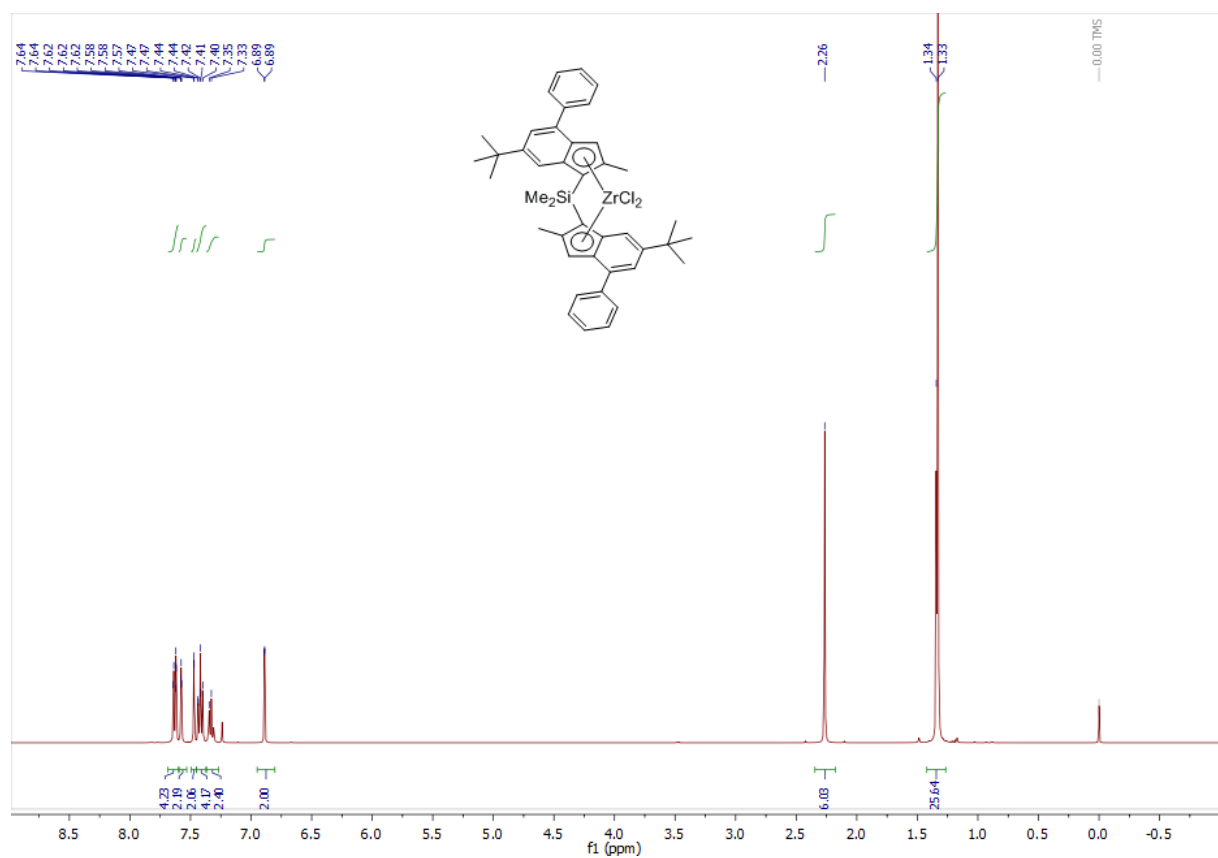

Figure S11. <sup>1</sup>H NMR spectrum of **M25** in CDCl<sub>3</sub>.

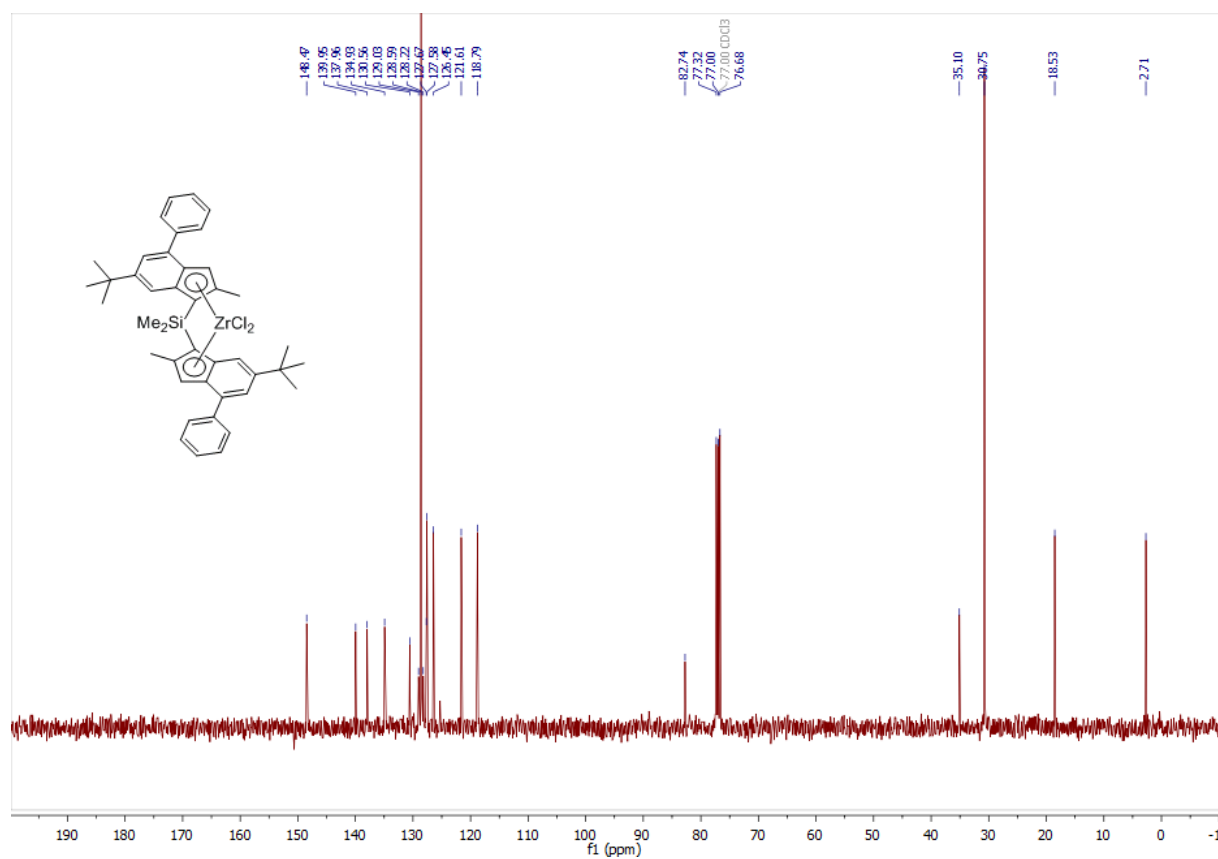

Figure S12. <sup>13</sup>C{<sup>1</sup>H} NMR spectrum of **M25** in CDCl<sub>3</sub>.

## M27

**6-chloro-1-methoxy-2-methyl-4-phenylindane**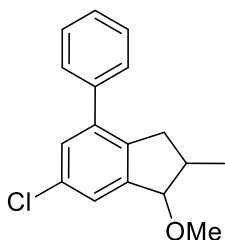

To a mixture of 27.8 g (101 mmol) of 4-bromo-6-chloro-1-methoxy-2-methylindane, 15.4 g (126.3 mmol, 1.25 equiv.) of  $\text{PhB(OH)}_2$ , 28.9 g (273 mmol) of  $\text{Na}_2\text{CO}_3$ , 320 ml of DME and 130 ml of  $\text{H}_2\text{O}$ , 1.20 g (5.35 mmol, 5.3 mol. %) of  $\text{Pd(OAc)}_2$  and 2.79 g (10.6 mmol, 10.5 mol.%) of triphenylphosphine were added. This mixture was refluxed for 6 h, then cooled to room temperature, evaporated to dryness, and 1.5 liter of cold water was added. The crude product

was extracted with 3 x 250 ml of dichloromethane. The combined organic extract was dried over  $\text{K}_2\text{CO}_3$  and then evaporated to dryness to give black oily liquid. The product was isolated by flash chromatography of the residue on silica gel 60 (40–63  $\mu\text{m}$ ; eluent: hexanes-dichloromethane = 3:1, vol., then hexanes-dichloromethane = 1:1, vol.). This procedure gave 23.9 g (87%) of the title product as yellowish oil. According to  $^1\text{H}$  NMR ( $\text{CDCl}_3$ ):  $\delta$  7.44–7.26 (m, 7H in A and B), 4.50 (d,  $J$  = 5.7 Hz, 1H in B), 4.38 (d,  $J$  = 4.4 Hz, 1H in A), 3.49 (s, 3H in A), 3.44 (s, 3H in B), 3.25–3.14 (m, 1H in A), 2.87 (dd,  $J$  = 15.8 Hz,  $J$  = 7.0 Hz, 1H in B), 2.73 (dd,  $J$  = 15.8 Hz,  $J$  = 6.4 Hz, 1H in B), 2.61–2.39 (m, 2H in A and 1H in B), 1.11 (d,  $J$  = 6.8 Hz, 3H in A), 1.04 (d,  $J$  = 6.9 Hz, 3H in B).  $^{13}\text{C}\{^1\text{H}\}$  NMR ( $\text{CDCl}_3$ ):  $\delta$  145.28, 144.95, 140.04, 139.96, 139.47, 139.43, 139.01, 132.37, 132.04, 128.35, 128.13, 127.45, 124.12, 124.07, 90.82, 85.74, 56.94, 56.88, 40.45, 39.07, 37.79, 37.65, 18.86, 13.32.

**6-mesityl-1-methoxy-2-methyl-4-phenylindane**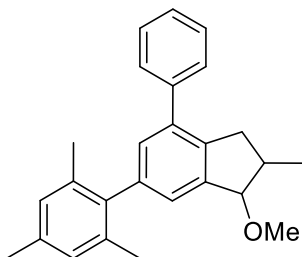

To a mixture of 2.00 g (2.90 mol.%) of  $\text{NiCl}_2(\text{PPh}_3)\text{IPr}$  and 23.9 g (87.6 mmol) of 6-chloro-1-methoxy-2-methyl-4-phenylindane 150 ml (150 mmol) of 1.0 M 2-mesitylmagnesium bromide in THF was added in one portion. The resulting solution was refluxed for 2 h, then cooled to room temperature, 300 ml of water and 400 ml of dichloromethane were added followed by 200 ml of 1 M HCl. The organic layer was separated, and the aqueous layer was extracted with 150 ml of dichloromethane. The combined organic extract was

evaporated to dryness to give red oil. The product was isolated by flash-chromatography on silica gel 60 (40–63  $\mu\text{m}$ ; eluent: hexanes-dichloromethane = 3:1, vol., then 1:1, vol.). This procedure gave 27.8 g (89%) of the title product as lightly yellowish thick oil which is a mixture of two diastereomers A and B in 1.5:1 molar ratio.  $^1\text{H}$  NMR ( $\text{CDCl}_3$ ):  $\delta$  7.49–7.30 (m, 5H in A and 5H in B), 7.15–7.11 (m, 2H in A and 2H in B), 6.95 (br.s, 2H in A and 2H in B), 4.52 (d,  $J$  = 5.5 Hz, 1H in B), 4.48 (d,  $J$  = 4.2 Hz, 1H in A), 3.48 (s, 3H in A), 3.42 (s, 3H in B), 3.38–3.30 (m, 1H in A), 3.04–2.85 (m, 2H in B), 2.65–2.48 (m, 2H in A and 1H in B), 2.33 (br.s, 3H in A and 3H in B), 2.08 (s) and 2.07 (s) and 2.06 (s) sum 6H in A and B, 1.17 (d,  $J$  = 6.7 Hz, 3H in A and 3H in B).  $^{13}\text{C}\{^1\text{H}\}$  NMR ( $\text{CDCl}_3$ ):  $\delta$  143.62, 143.13, 140.74, 139.86, 139.63, 139.24, 138.95, 138.81, 138.47, 138.38, 136.45, 136.30, 136.20, 135.96, 135.90, 129.55, 129.40, 128.56, 128.39, 128.23, 128.06, 128.00, 126.91, 125.24, 125.13, 91.29, 86.11, 56.53, 56.46, 40.44, 39.52, 38.29, 38.20, 20.99, 20.95, 20.90, 19.02, 13.65.

### 5-mesityl-2-methyl-7-phenyl-1H-indene

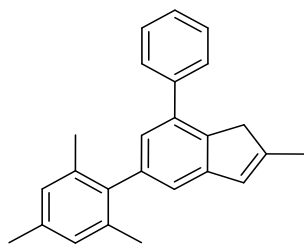

To a solution of 27.8 g (78.0 mmol) of 6-mesityl-1-methoxy-2-methyl-4-phenylindane in 250 ml of toluene 250 mg of TsOH was added. The resulting solution was refluxed using Dean-Stark head for 10 min, then additional 100 mg of TsOH was added, and the reaction mixture was refluxed using Dean-Stark head for another 10 min. Further on, it was cooled to room temperature and washed by 100 ml of 10% K<sub>2</sub>CO<sub>3</sub>. The organic layer was separated, and the aqueous layer was extracted with 150 ml of dichloromethane. The

combined organic extract was evaporated under reduced pressure, and the product was isolated by flash-chromatography on silica gel 60 (40-63  $\mu$ m; eluent: hexanes, then hexanes-dichloromethane = 10:1, vol.). This procedure gave 23.5 g (93%) of the title product as a slightly yellowish thick oil. <sup>1</sup>H NMR (CDCl<sub>3</sub>):  $\delta$  7.56 (d,  $J$  = 7.3 Hz, 2H), 7.42 (dd,  $J$  = 7.3 Hz, 2H), 7.32 (t,  $J$  = 7.3 Hz, 1H), 7.02 (s, 1H), 6.94 (s, 3H), 6.54 (m, 1H), 3.45 (s, 2H), 2.32 (s, 3H), 2.15 (s, 3H), 2.08 (s, 6H). <sup>13</sup>C{<sup>1</sup>H} NMR (CDCl<sub>3</sub>):  $\delta$  146.65, 146.57, 141.28, 139.90, 139.45, 138.82, 137.10, 136.28, 136.11, 128.41, 128.34, 127.97, 127.27, 126.96, 125.26, 119.93, 42.67, 21.00, 20.89, 16.72.

### bis(6-mesityl-2-methyl-4-phenyl-1H-inden-1-yl)(dimethyl)silane

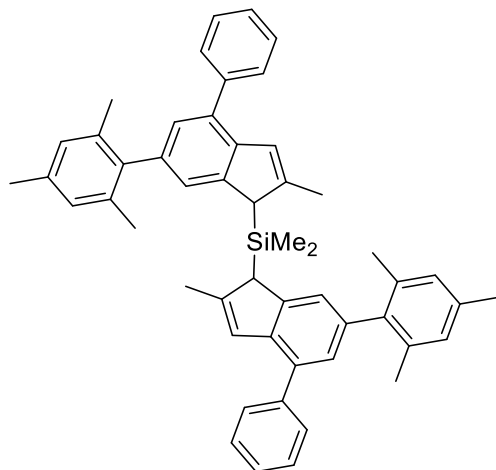

To a solution of 22.7 g (70.0 mmol) of 5-mesityl-2-methyl-7-phenyl-1H-indene in 300 ml of ether 28.8 ml (70.0 mmol) of 2.43 M <sup>n</sup>BuLi in hexanes was added in one portion at -40 °C. This mixture was stirred for 3.5 h at room temperature, then the resulting bright red solution was cooled to -40 °C (a lot of yellow precipitate fell out that does not dissolve when the temperature reached -20 °C), and 280 mg of CuCN was added. The resulting mixture was stirred for 30 min at -25 °C, then 4.52 g (35.0 mmol) of dichlorodimethylsilane was added in one portion. Further on, this mixture was stirred overnight at ambient temperature, then filtered through a short pad of silica gel 60 (40-63  $\mu$ m) which was

additionally washed by 2 x 50 ml of dichloromethane. The combined filtrate was evaporated under reduced pressure, and the residue was dried in vacuum at elevated temperature. This procedure gave 24.6 g (ca. 100%) of the title product (ca. 85% purity by NMR, mixture of *meso* and *rac* isomers in 1.5:1 molar ratio) as yellowish glass which was used further without additional purification. HRMS: [M]<sup>+</sup> calc. for C<sub>52</sub>H<sub>52</sub>Si: 704.3838; found: 704.3856. <sup>1</sup>H NMR (CDCl<sub>3</sub>):  $\delta$  7.60–7.52 (m, 4H in *rac* and *meso*), 7.47–7.29 (m, 8H in *rac* and *meso*), 7.13 (br.s, 2H in *meso*), 7.08 (d,  $J$  = 1.1 Hz, 2H in *rac*), 7.06 (d,  $J$  = 1.1 Hz, 2H in *meso*), 6.97–6.91 (m, 2H in *meso* and 4H in *rac*), 6.85 (br.s, 2H in *rac* and *meso*), 3.90 (s, 2H in *rac*), 3.85 (s, 2H in *meso*), 2.32 (s) and 2.22 (br.s) and 2.13 (br.s) and 2.10 (s) and 2.07 (s) and 2.06 (br.s) sum 24H in *rac* and *meso*, -0.15 (s, 3H in *meso*), -0.21 (s, 3H in *rac*), -0.23 (s, 6H in *meso*).

***rac*-dimethylsilanediybis[ $\eta^5$ -6-mesityl-2-methyl-4-phenylinden-1-yl]zirconium dichloride (M27)**

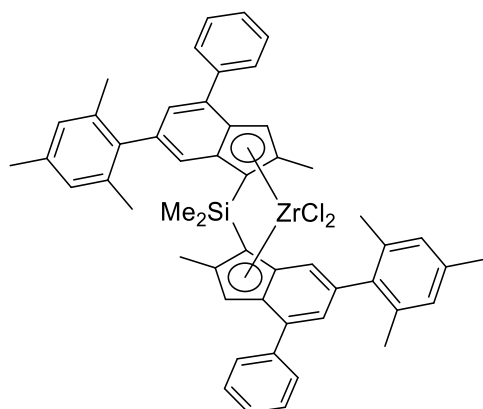

To a cooled to  $-60\text{ }^{\circ}\text{C}$  solution of 14.8 g (20.99 mmol) of bis(6-mesityl-2-methyl-4-phenyl-1*H*-inden-1-yl)(dimethyl)silane in 170 ml of ether 17.3 ml (42.0 mmol) of 2.43 M  $n\text{-BuLi}$  in hexanes was added in one portion. This mixture was stirred overnight at room temperature. The resulting red solution was cooled to  $-60\text{ }^{\circ}\text{C}$ , and 4.9 g (21.03 mmol) of  $\text{ZrCl}_4$  was added. The reaction mixture was stirred for 24 h, then evaporated to dryness, the residue was heated with 200 ml of toluene, and thus obtained hot suspension was filtered through glass frit (G4). The filtrate was evaporated to ca. 70 ml. Yellow solid precipitated overnight at room

temperature was filtered off and dried in vacuum to give 5.20 g (27%) of *rac*-complex (2:1 solvate with toluene). The mother liquor was evaporated to ca. 50 ml. Yellow solid precipitated overnight at room temperature was filtered off and then dried in vacuum to give 3.60 g (19%) of *rac*-complex (2:1 solvate with toluene). Finally, the mother liquor was evaporated to ca. 20 ml, and 40 ml of *n*-hexane was added. Yellow solid precipitated from this solution at ambient temperature was filtered off (G3) and dried in vacuum to give 1.15 g (6%) of *rac*-complex (2:1 solvate with toluene). Thus, the total yield of *rac*-complex (as 2:1 solvate with toluene) isolated in this synthesis was 9.95 g (52%). Anal. calc. for  $\text{C}_{52}\text{H}_{50}\text{Cl}_2\text{SiZr} \cdot 0.5\text{PhMe}$ : C, 73.15; H, 5.97. Found: C, 73.24; H, 6.08.  $^1\text{H}$  NMR ( $\text{CDCl}_3$ ):  $\delta$  7.72–7.65 (m, 2H), 7.46–7.38 (m, 3H), 7.37–7.30 (m, 1H), 7.28–7.22 (m, PhMe), 7.20 (d,  $J = 1.0\text{ Hz}$ , 1H), 7.19–7.12 (m, PhMe), 7.06 (s, 1H), 6.96 (s, 2H), 2.35 (s, PhMe), 2.34 (s, 3H), 2.24 (s, 3H), 2.12 (s, 3H), 2.05 (s, 3H), 1.23 (s, 3H).  $^{13}\text{C}\{^1\text{H}\}$  NMR ( $\text{CDCl}_3$ , resonances of the cocrystallized toluene were omitted):  $\delta$  139.53, 139.27, 138.81, 138.52, 136.96, 136.87, 136.13, 135.22, 131.24, 129.02, 128.75, 128.67, 128.64, 128.32, 127.98, 127.80, 123.82, 122.23, 84.24, 21.19, 21.04 (two resonances), 18.89, 2.51.



## M28

**2,7-dimethyl-5-*tert*-butyl-indan-1-one**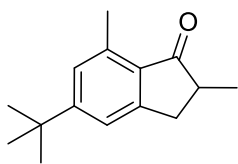

To a solution of diisopropylamine (6.92 ml, 49.4 mmol) in THF (200 ml) *n*BuLi (19.8 ml 2.5M in hexanes, 49.4 mmol) was added at  $-80^{\circ}\text{C}$ . The reaction mixture was stirred for 10 min at room temperature, and a solution of 7-methyl-5-*tert*-butyl-indan-1-one (10.0 g, 49.4 mmol) in THF (200 ml) was added dropwise for 30 min. To the resulting solution HMPA (42.6 ml, 247 mmol) and iodomethane (15.4 ml, 247 mmol) were subsequently added. The reaction mixture was stirred overnight at room temperature. Water (700 ml) and dichloromethane (300 ml) were then added to the reaction mixture. The organic layer was separated, and the aqueous layer was extracted with 400 ml of dichloromethane. The combined organic phase was evaporated to dryness. The product was isolated by flash-chromatography on silica gel 60 (40–63  $\mu\text{m}$ ; eluent: hexanes-ethyl acetate; 15:1, vol.). This procedure gave 8.10 g (76%) of the title product as a colorless oil.  $^1\text{H}$  NMR ( $\text{CDCl}_3$ ):  $\delta$  7.24 (br.s, 1H), 7.12 (br.s, 1H), 3.31 (dd,  $J = 17.9$ ,  $J = 8.8$  Hz, 1H), 2.69–2.59 (m, 2H), 2.62 (s, 3H), 1.33 (s, 9H), 1.29 (d,  $J = 7.2$  Hz, 3H).

**6-*tert*-butyl-2,3,4-trimethyl-1H-indene**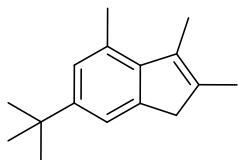

To a solution of 2,7-dimethyl-5-*tert*-butyl-indan-1-one (8.10 g, 37.4 mmol) in diethyl ether (200 ml) methylmagnesium bromide (25.8 ml of 2.9M in ether, 74.9 mmol) was added dropwise at room temperature. The resulting mixture was stirred overnight at room temperature, then it was accurately poured into 400 ml of saturated aqueous  $\text{NH}_4\text{Cl}$  solution. The organic layer was separated, and the aqueous layer was extracted with 100 ml of diethyl ether. The combined organic phase was evaporated to dryness. To the resulting oil 200 ml of toluene and 500 mg of *p*-toluenesulfonic acid were added. Further on, this mixture was stirred for 30 min at  $60^{\circ}\text{C}$ , then filtered through a short pad of silica gel 60 (40–63  $\mu\text{m}$ ) which was additionally washed by 2x20 ml of toluene. The combined filtrate was evaporated to dryness, and the residue was purified by flash chromatography on silica gel 60 (40–63  $\mu\text{m}$ , eluent: hexanes). Yield 7.27 g (91%) of the product as a colorless solid.  $^1\text{H}$  NMR ( $\text{CDCl}_3$ ):  $\delta$  7.25 (br.s, 1H), 7.01 (br.s, 1H), 3.21 (br.s, 2H), 2.59 (s, 3H), 2.21 (m, 3H), 2.02 (br.s, 3H), 1.33 (s, 9H).

**bis(6-*tert*-butyl-2,3,4-trimethyl-1H-inden-1-yl)dimethylsilane**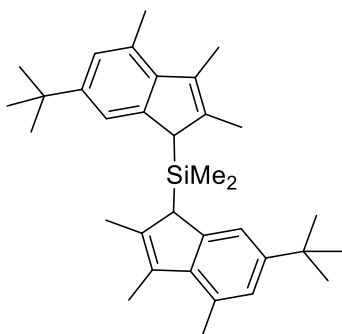

To a solution of 7.27 g (33.9 mmol) of 6-*tert*-butyl-2,3,4-trimethyl-1H-indene in 130 ml of ether 13.6 ml (33.9 mmol) of 2.5 M  $n\text{BuLi}$  in hexanes was added in one portion at  $-40^{\circ}\text{C}$ . This mixture was stirred overnight at room temperature, then the resulting light-orange solution was cooled to  $-80^{\circ}\text{C}$ , and 50 mg of N-methylimidazole was added. The resulting mixture was stirred for 5 min at  $-80^{\circ}\text{C}$ , then 2.19 g (17.0 mmol) of dichlorodimethylsilane was added in one portion. Further on, this mixture was stirred overnight at ambient temperature, then filtered through a short pad of silica gel 60 (40–63  $\mu\text{m}$ ) which was additionally washed by 2 x 30 ml of dichloromethane. The combined filtrate was evaporated under reduced pressure, and the residue was purified by flash chromatography on silica gel 60 (40–63  $\mu\text{m}$ , eluent: hexane:dichloromethane; 10:1, vol.). Yield 4.75 g (58%) of the product as a yellowish foam. According to  $^1\text{H}$  NMR, the product was a mixture of *rac*- and *meso*-isomers in ca. 1:6 molar ratio. Anal. calc. for  $\text{C}_{34}\text{H}_{48}\text{Si}$ : C, 84.23; H, 9.98. Found: C, 84.15; H, 10.14.  $^1\text{H}$  NMR ( $\text{CDCl}_3$ ):  $\delta$  7.39 (m, 2H in *rac*), 7.20 (m, 2H in *meso*), 6.99 (m, 2H in *rac*), 6.98 (m,



2H, *meso*), 3.46 (br.s, 2H, in *rac* and *meso*), 2.63 (s, 3H in *rac*), 2.61 (s, 3H in *meso*), 2.27 (m, 3H in *meso*), 2.20 (m, 3H in *rac*), 2.07 (br.s, 3H in *meso*), 1.88 (br.s, 3H in *rac*), 1.31 (s, 18H in *rac*), 1.30 (s, 18H in *meso*), -0.24 (s, 3H in *meso* and 6H in *rac*), -0.45 (s, 3H in *meso*).

***rac*-dimethylsilanediylbis[ $\eta^5$ -2,3,4-trimethyl-6-*tert*-butyl-inden-1-yl]zirconium dichloride (M28)**

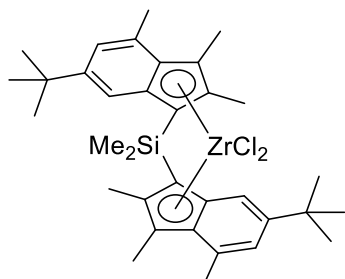

To a cooled to -40 °C solution of 2.00 g (4.12 mmol) of bis(2,3,4-trimethyl-6-*tert*-butyl-1*H*-inden-1-yl)dimethylsilane in 150 ml of ether 3.30 ml (8.25 mmol) of 2.5 M *n*BuLi in hexanes was added in one portion. This mixture was stirred overnight at room temperature. The resulting light-yellow solution was cooled to -80 °C, and 960 mg (4.12 mmol) of ZrCl<sub>4</sub> was added. The reaction mixture was stirred for 24 h, and then evaporated to dryness. The residue was heated with 150 ml of toluene, and the

formed hot suspension was filtered through glass frit (G4). The filtrate was evaporated to dryness giving 2.10 g of a 1:1 mixture of *rac*- and *meso*-complexes. This crude product was recrystallized from methylcyclohexane/hexane mixture (1:1, vol.) yielding 770 mg (29%) of *rac*-complex as an yellow powder. *Rac*-zirconocene. Anal. calc. for C<sub>34</sub>H<sub>46</sub>Cl<sub>2</sub>SiZr: C, 63.32; H, 7.19. Found: C, 63.42; H, 7.28. <sup>1</sup>H NMR (CDCl<sub>3</sub>):  $\delta$  7.32 (br.s, 2H), 7.04 (br.s, 2H), 2.51 (s, 6H), 2.34 (s, 6H), 1.95 (s, 6H), 1.29 (s, 6H), 1.24 (s, 18H). <sup>13</sup>C{<sup>1</sup>H} NMR (CD<sub>2</sub>Cl<sub>2</sub>):  $\delta$  148.8, 136.9, 134.0, 131.9, 129.4, 128.8, 128.3, 119.0, 80.5, 36.1, 31.9, 23.1, 17.2, 15.7, 5.1.

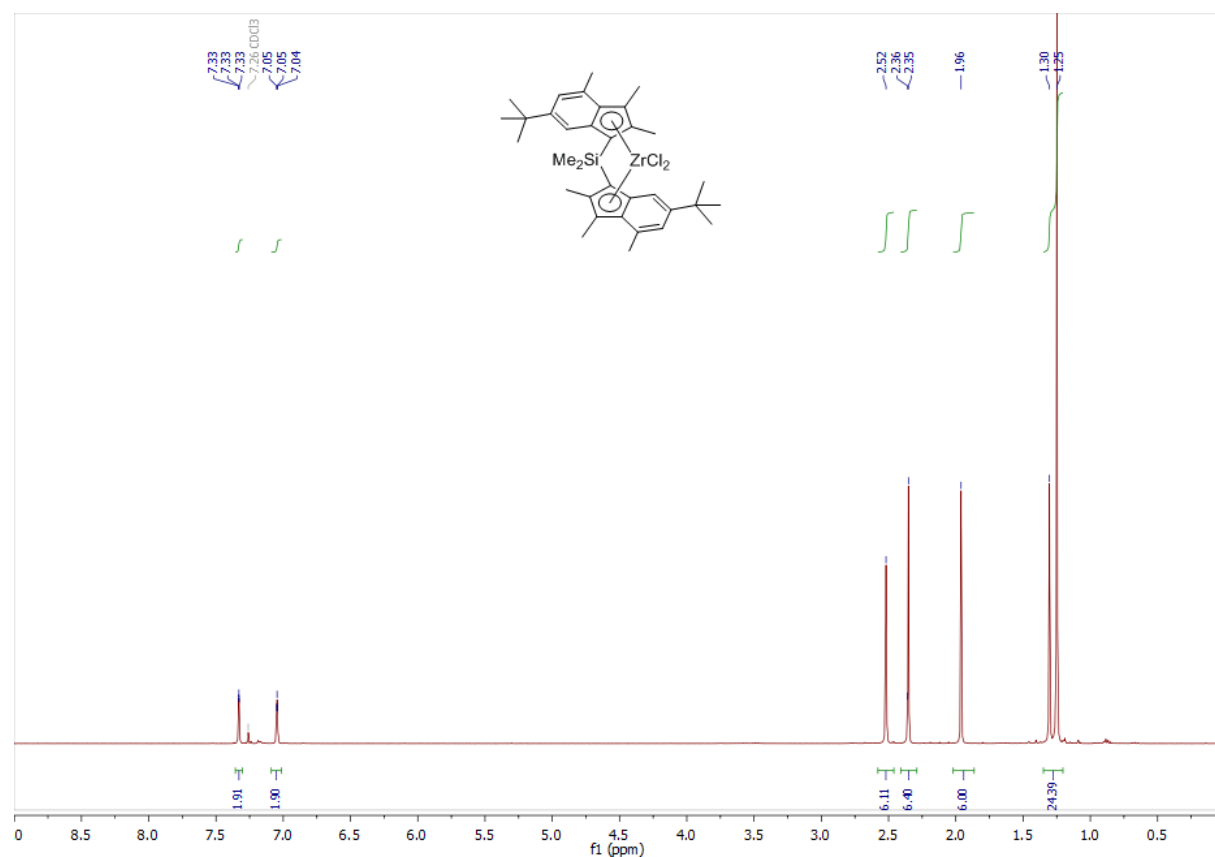

**Figure S15.** <sup>1</sup>H NMR spectrum of **M28** in CDCl<sub>3</sub>.

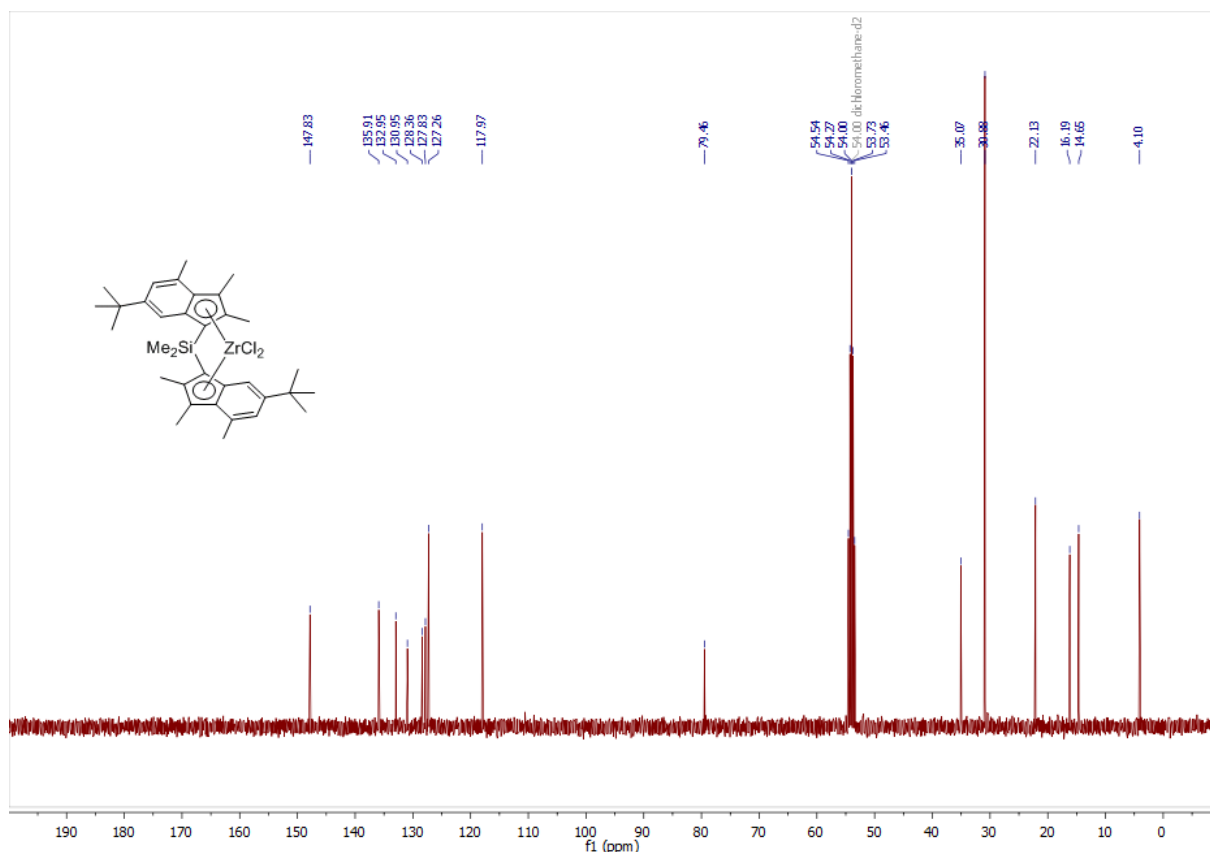

Figure S16.  $^{13}\text{C}\{^1\text{H}\}$  NMR spectrum of **M28** in  $\text{CD}_2\text{Cl}_2$ .

## M31

### bis(6-tert-butyl-2-methyl-4-bromo-1H-inden-1-yl)dimethylsilane

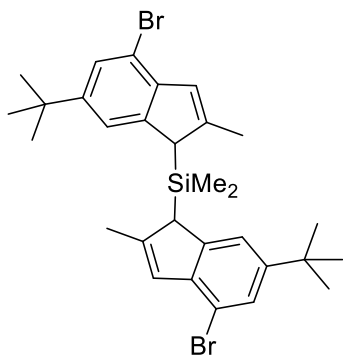

To a solution of 5.00 g (18.8 mmol) of 7-bromo-5-*tert*-butyl-2-methyl-1*H*-indene in 130 ml of ether 7.55 ml (18.8 mmol) of 2.5 M *n*BuLi in hexanes was added in one portion at  $-40^\circ\text{C}$ . This mixture was stirred overnight at room temperature, then cooled to  $-80^\circ\text{C}$ , and 30 mg of N-methylimidazole was added. The resulting mixture was stirred for 5 min at  $-80^\circ\text{C}$ , and then 1.21 g (9.40 mmol) of dichlorodimethylsilane was added in one portion. Further on, this mixture was stirred overnight at ambient temperature, then filtered through a short pad of silica gel 60 (40-63  $\mu\text{m}$ ) which was additionally washed by 2 x 30 ml of dichloromethane. The combined filtrate was

evaporated under reduced pressure, and the residue was purified by flash chromatography on silica gel 60 (40-63  $\mu\text{m}$ , eluent: hexane:dichloromethane; 10:1, vol.). Yield 4.85 g (88%) of the product as yellowish foam. According to  $^1\text{H}$  NMR, the product was a mixture of *rac*- and *meso*-isomers in ca. 1:2.5 molar ratio. Anal. calc. for  $\text{C}_{30}\text{H}_{38}\text{Br}_2\text{Si}$ : C, 61.43; H, 6.53. Found: C, 61.80; H, 6.71.  $^1\text{H}$  NMR ( $\text{CDCl}_3$ ):  $\delta$  7.40 (m, 2H in *rac*), 7.37 (d,  $J = 1.3$  Hz, 2H in *rac*), 7.36 (d,  $J = 1.3$  Hz, 2H in *meso*), 7.26 (m, 2H in *meso*), 6.65 (br.s, 2H in *meso*), 6.61 (br.s, 2H in *rac*), 3.68 (br.s, 2H in *rac*), 3.64 (br.s, 2H in *meso*), 2.18 (d,  $J = 0.9$  Hz, 3H in *meso*), 2.14 (d,  $J = 0.9$  Hz, 3H in *rac*), 1.29 (br.s, 18H in *rac* and *meso*),  $-0.17$  (s, 3H in *meso*),  $-0.24$  (s, 6H in *rac*),  $-0.30$  (s, 3H in *meso*).

***rac*-dimethylsilanediylbis( $\eta^5$ -2-methyl-4-bromo-6-*tert*-butyl-inden-1-yl)dimethylzirconium (M31)**

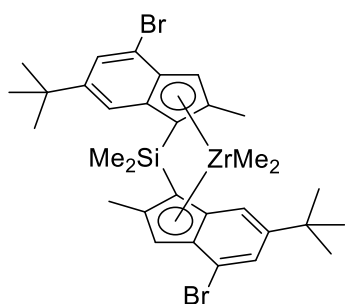

To a cooled to  $-40\text{ }^{\circ}\text{C}$  solution of 4.85 g (8.27 mmol) of bis(2-methyl-4-bromo-6-*tert*-butyl-1*H*-inden-1-yl)dimethylsilane in 150 ml of ether 6.61 ml (16.5 mmol) of 2.5 M  $n\text{BuLi}$  in hexanes was added in one portion. This mixture was stirred overnight at room temperature, then cooled to  $-80\text{ }^{\circ}\text{C}$ , and 4.39 g (8.27 mmol) of  $[\text{PhN}(\text{CH}_2)_3\text{NPh}]\text{ZrCl}_2(\text{THF})_2$  was added. The reaction mixture was stirred for 24 h, and then evaporated to dryness. The residue was heated with 150 ml of toluene, and the formed hot suspension was filtered through glass frit (G4). The filtrate was

evaporated to dryness, the residue was dissolved in 140 ml of diethyl ether/dichloromethane (1:1, vol.). This solution was cooled to  $-110\text{ }^{\circ}\text{C}$ , and 9.58 ml (14.8 mmol, 1.54 M) of HCl in diethyl ether was carefully added. The resulting yellow suspension was stirred overnight at room temperature and then evaporated to dryness. The residue was recrystallized from toluene yielding 970 mg (18%) of a 10:1 mixture of *rac*- and *meso*-zirconocene dichlorides. This solid was dissolved in a 40 ml of toluene, and 1.00 ml (2.7 mmol, 2.7 M) of MeMgBr in diethyl ether was added. The reaction mixture was stirred at  $90\text{ }^{\circ}\text{C}$  overnight and then evaporated to dryness. The residue was extracted with 2 x 20 ml of hot toluene, the combined extract was filtered through a thin pad of Celite 503, and the filtrate was evaporated to dryness. The crude product was recrystallized from hexane yielding 150 mg of pure dimethylated *rac*-complex as a light-yellow powder. Anal. calc. for  $\text{C}_{32}\text{H}_{42}\text{Br}_2\text{SiZr}$ : C, 54.46; H, 6.00. Found: C, 55.12; H, 6.11.  $^1\text{H}$  NMR ( $\text{CDCl}_3$ ):  $\delta$  7.52 (d,  $J = 1.3\text{ Hz}$ , 2H), 7.38 (m, 2H), 6.77 (s, 2H), 2.06 (s, 6H), 1.25 (s, 18H), 1.08 (s, 6H),  $-1.16$  (s, 6H).  $^{13}\text{C}\{^1\text{H}\}$  NMR ( $\text{CDCl}_3$ ):  $\delta$  150.9, 136.5, 133.1, 131.1, 129.4, 122.9, 120.9, 120.5, 86.6, 36.6, 31.9, 20.0, 3.7.

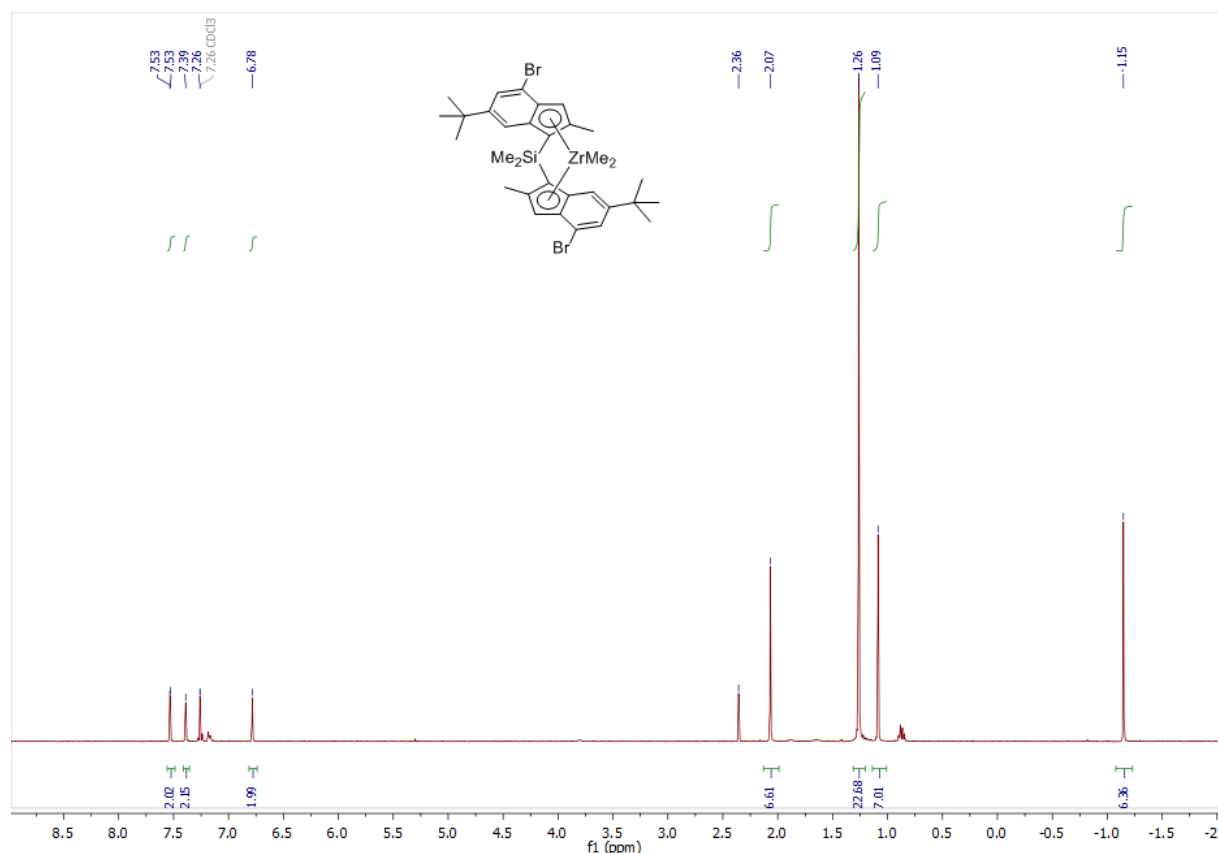

**Figure S17.**  $^1\text{H}$  NMR spectrum of M31 in  $\text{CDCl}_3$ . Traces of toluene are visible at 2.36 and 7.13–7.26 ppm.

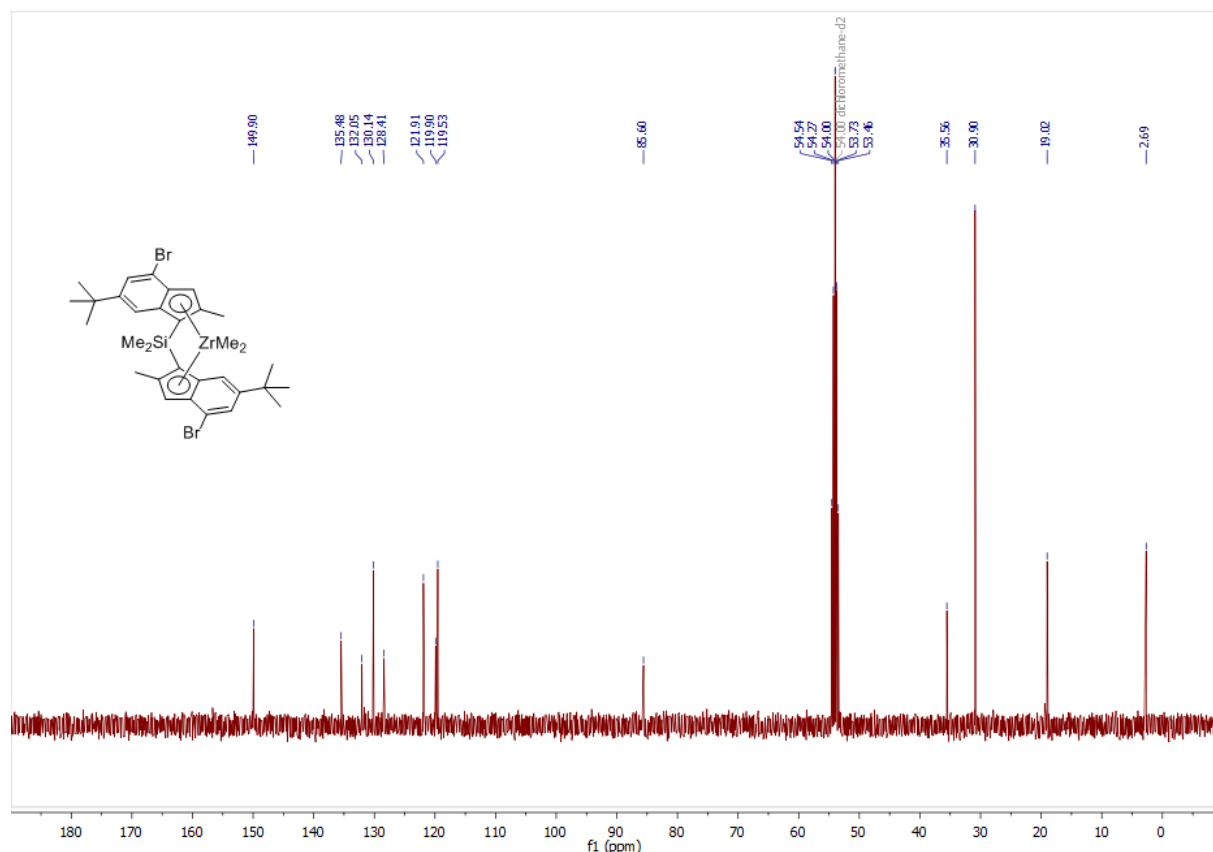

**Figure S18.**  $^{13}\text{C}\{^1\text{H}\}$  NMR spectrum of **M31** in  $\text{CD}_2\text{Cl}_2$ .

## M32

### 5/6-*tert*-butyl-2-methyl-7/4-(2-thienyl)-1H-indene

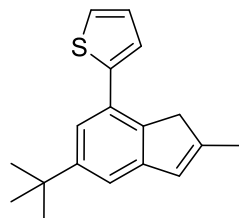

To a mixture of 4.00 g (2.1 mol.%) of  $\text{NiCl}_2(\text{PPh}_3)_2$  and 65.0 g (245.1 mmol) of 7-bromo-5-*tert*-butyl-2-methyl-1H-indene a solution of 2-thienylmagnesium bromide in THF obtained from 71.4 g (438 mmol) of 2-bromothiophene, 11.7 g (482 mmol) of magnesium turnings, and 300 ml of THF was added in one portion. The resulting solution was refluxed for 40 min, then cooled to room temperature, 1200 ml of water and 1000 ml of ether were added followed by

500 ml of 1 M HCl. The organic layer was separated, and the aqueous layer was extracted with 500 ml of ether. The combined organic extract was evaporated to dryness to give a red oil. The product was isolated by flash-chromatography on silica gel 60 (40-63  $\mu\text{m}$ ; eluent: hexanes-dichloromethane = 10:1, vol.) followed by distillation in vacuo, b.p. 188  $^\circ\text{C}$ /7 mm Hg. This procedure gave 12.7 g (19%) of a ca. 65:35 mixture of 5-*tert*-butyl-2-methyl-7-(2-thienyl)-1H-indene and 6-*tert*-butyl-2-methyl-4-(2-thienyl)-1H-indene as yellowish thick oil.  $^1\text{H}$  NMR ( $\text{CDCl}_3$ ):  $\delta$  7.40 (d,  $J$  = 1.7 Hz), 7.38 (s), 7.55 (dd,  $J$  = 3.7 Hz,  $J$  = 1.1 Hz), 7.32–7.28 (2dd), 7.27 (d,  $J$  = 1.7 Hz), 7.22 (dd,  $J$  = 3.6 Hz,  $J$  = 1.1 Hz, sum 4H), 7.13–7.08 (2dd, 1H), 6.85 and 6.50 (2m, sum 1H), 3.46 and 3.33 (2m, sum 2H), 2.16 and 2.15 (2m, sum 3H), 1.37 and 1.36 (2s, sum 9H).  $^{13}\text{C}\{^1\text{H}\}$  NMR ( $\text{CDCl}_3$ ):  $\delta$  150.27, 147.04, 146.89, 146.43, 146.32, 144.26, 144.02, 143.93, 140.71, 136.87, 129.08, 127.39, 127.32, 127.23, 126.05, 124.95, 124.51, 124.44, 124.38, 123.58, 120.30, 120.08, 116.57, 43.41, 42.98, 34.68, 34.56, 31.58, 16.95, 16.77.

***rac*-dimethylsilanediylbis[ $\eta^5$ -6-*tert*-butyl-2-methyl-4-(2-thienyl)-1H-inden-1-yl]zirconium dichloride (M32)**

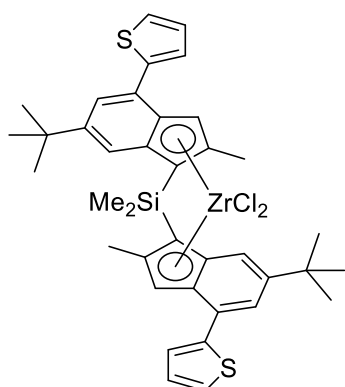

To a solution of 11.9 g (44.3 mmol) of 5-*tert*-butyl-2-methyl-7-(2-thienyl)-1H-indene in 200 ml of ether 18.2 ml (44.2 mmol) of 2.43 M  $n$ BuLi in hexanes was added in one portion at  $-60^\circ\text{C}$ . This mixture was stirred overnight at room temperature, then the obtained suspension was cooled to  $-40^\circ\text{C}$ , and 2.86 g (22.16 mmol) of dichlorodimethylsilane was added in one portion. Further on, this mixture was stirred overnight at ambient temperature, then cooled to  $-40^\circ\text{C}$ , and 18.2 ml (44.2 mmol) of 2.43 M  $n$ BuLi in hexanes was added in one portion. This mixture was stirred for 5.5 h at room temperature, then cooled to  $-60^\circ\text{C}$ , and 5.16 g (22.1 mmol) of  $\text{ZrCl}_4$  was added. The obtained mixture was stirred overnight at room temperature, then

evaporated to dryness, and the residue was heated with 200 ml of toluene, and thus obtained hot suspension was filtered through glass frit (G4). The obtained filtrate was evaporated to dryness, and the residue was crystallized from a mixture of toluene and *n*-hexane giving 5.70 g (34%) of pure *rac*-material. Anal. calc. for  $\text{C}_{38}\text{H}_{42}\text{Cl}_2\text{S}_2\text{SiZr}$ : C, 60.60; H, 5.62. Found: C, 61.03; H, 5.70.  $^1\text{H}$  NMR ( $\text{CDCl}_3$ ):  $\delta$  7.58–7.54 (m, 2H), 7.40 (dd,  $J = 3.6$  Hz,  $J = 1.0$  Hz, 1H), 7.28 (dd,  $J = 5.1$  Hz,  $J = 1.0$  Hz, 1H), 7.09–7.05 (m, 2H), 2.26 (s, 3H), 1.34 (s, 3H), 1.33 (s, 9H).  $^{13}\text{C}\{^1\text{H}\}$  NMR ( $\text{CDCl}_3$ ):  $\delta$  148.31, 141.87, 134.96, 131.29, 129.46, 127.98, 127.92, 126.09, 126.01, 125.03, 121.76, 118.97, 83.40, 35.01, 30.74, 18.58, 2.66.

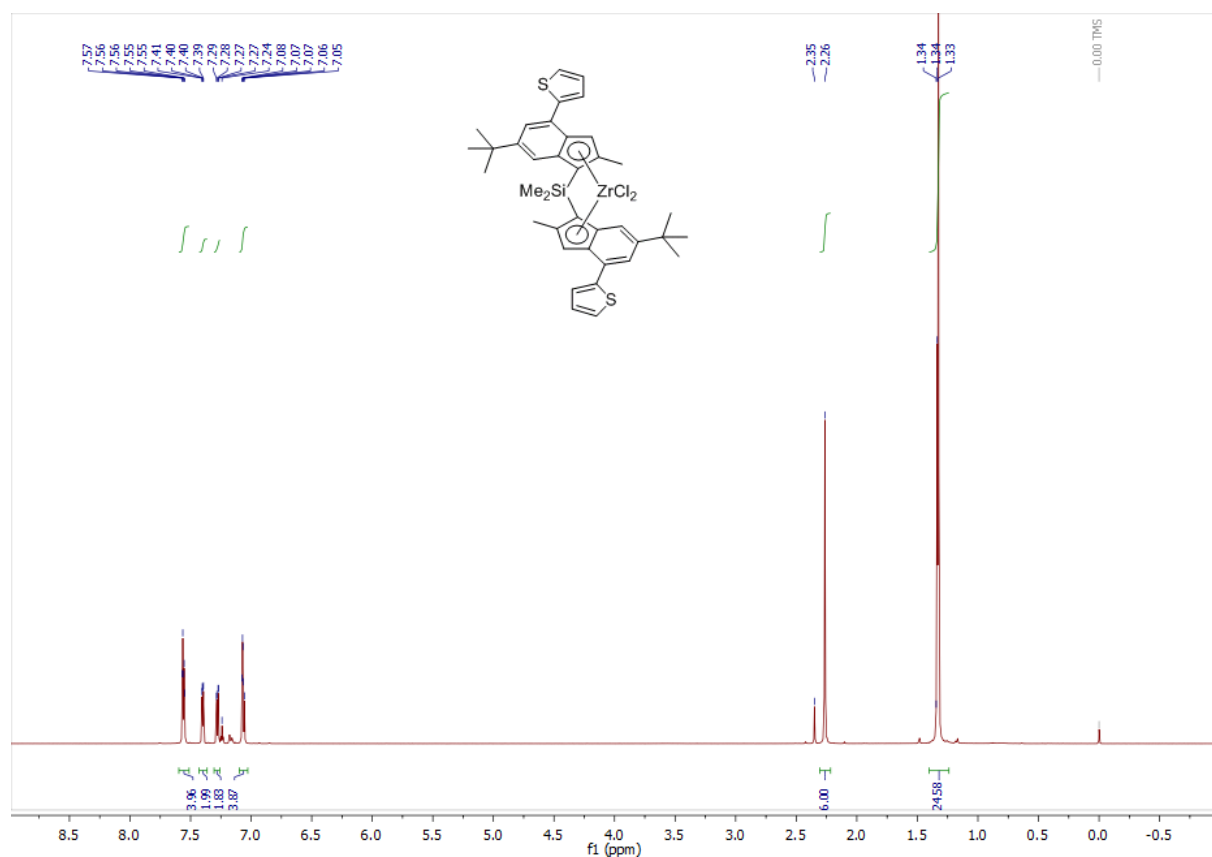

**Figure S19.**  $^1\text{H}$  NMR spectrum of **M32** in  $\text{CDCl}_3$ . Traces of toluene are visible at 2.36 and 7.13–7.26 ppm.



150.5, 146.9, 146.0, 145.5, 141.0, 140.5, 134.4, 125.8, 123.4, 122.9, 120.6, 119.5, 47.4, 35.0, 31.6 (two resonances), 18.1, -5.26, -5.29.

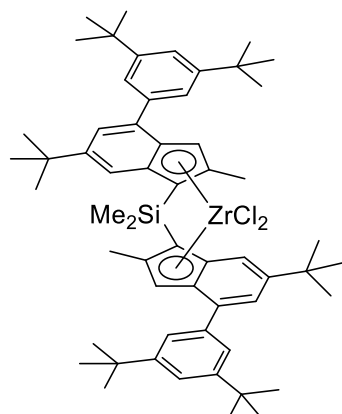

***rac*-dimethylsilanediyl-bis[ $\eta^5$ -6-*tert*-butyl-4-(3,5-di-*tert*-butylphenyl)-2-methylinden-1-yl]zirconium dichloride (M33)**

To a cooled to  $-60\text{ }^{\circ}\text{C}$  solution of 20.0 g (24.8 mmol) of bis[6-*tert*-butyl-4-(3,5-di-*tert*-butylphenyl)-2-methyl-1*H*-inden-1-yl](dimethyl)silane in 250 ml of ether 20.5 ml (49.8 mmol) of 2.43 M  $n\text{BuLi}$  in hexanes was added in one portion. This mixture was stirred overnight at room temperature. The resulting light-orange slightly turbid solution was cooled to  $-60\text{ }^{\circ}\text{C}$ , and 5.79 g (24.9 mmol) of  $\text{ZrCl}_4$  was added. The reaction mixture was stirred for 24 h, then evaporated to dryness, the residue was heated with 250 ml of toluene, and thus obtained hot suspension was filtered through glass frit (G4). The filtrate was evaporated to ca. 70 ml. Yellow solid precipitated overnight at room

temperature was filtered off (G3) and dried in vacuum. This procedure gave 4.00 g (17%) of a ca. 1:2 mixture of *rac*- and *meso*-zirconocenes. The mother liquor was evaporated to ca. 50 ml. Yellow solid precipitated at room temperature was filtered off (G3) and dried in vacuum to give 4.30 g (18%) of pure *rac*-complex. Further on, the mother liquor was evaporated to ca. 40 ml. Yellow solid precipitated overnight at room temperature was filtered off (G3) and dried in vacuum. This procedure gave 3.80 g (16%) of a ca. 85/15 mixture of *rac*- and *meso*-zirconocenes. Finally, the mother liquor was evaporated to the state of viscous oil, and the residue was triturated with 30 ml of *n*-hexane. The precipitate was filtered off and dried in vacuum. This procedure gave 1.40 g (6%) of *rac*-complex contaminated with a few percent of an unknown impurity. Thus, the total yield of *rac*- and *meso*-zirconocenes isolated in this synthesis was 13.5 g (56%). *Rac*-zirconocene. Anal. calc. for  $\text{C}_{58}\text{H}_{78}\text{Cl}_2\text{SiZr}$ : C, 72.15; H, 8.14. Found: C, 72.32; H, 8.22.  $^1\text{H}$  NMR ( $\text{CDCl}_3$ ):  $\delta$  7.59 (s, 1H), 7.62 (d,  $J = 1.7\text{ Hz}$ , 2H), 7.50 (d,  $J = 1.3\text{ Hz}$ , 1H), 7.40 (t,  $J = 1.7\text{ Hz}$ , 1H), 6.87 (s, 1H), 2.25 (s, 3H), 1.35 (2s, 12H), 1.32 (s, 18H).  $^{13}\text{C}\{^1\text{H}\}$  NMR ( $\text{CDCl}_3$ ):  $\delta$  150.89, 148.41, 139.01, 134.76, 130.57, 128.03, 126.05, 123.25, 122.36, 121.46, 118.58, 82.55, 35.09, 35.04, 31.53, 30.90, 18.55, 2.79.

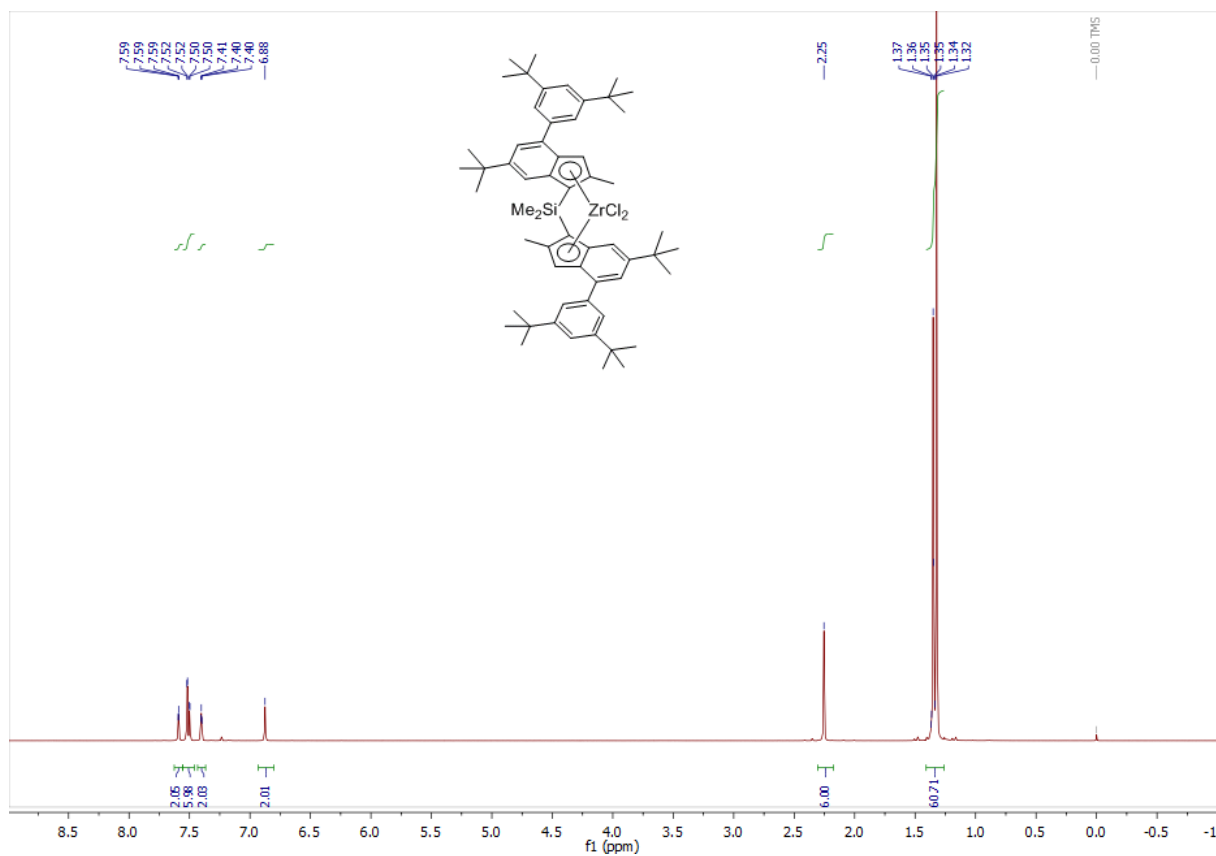

**Figure S21.**  $^1\text{H}$  NMR spectrum of **M33** in  $\text{CDCl}_3$ .

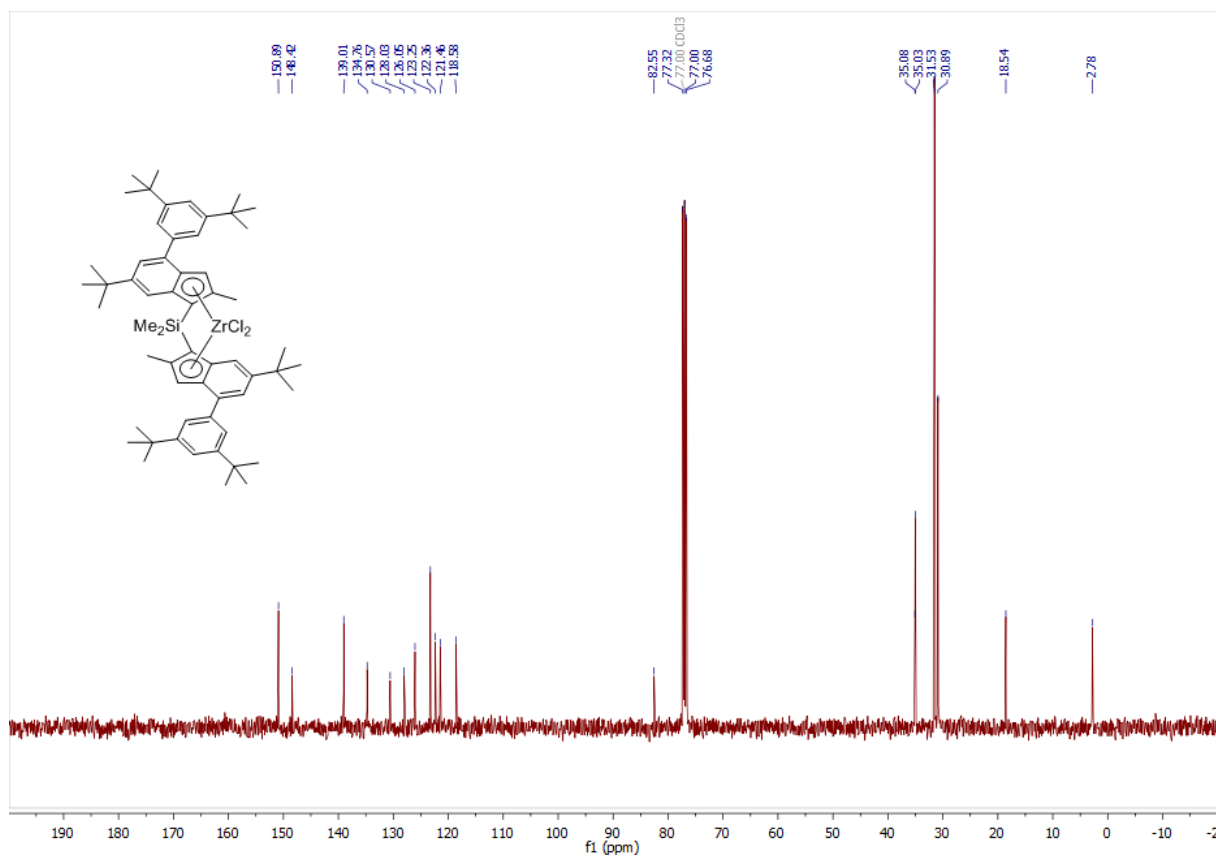

**Figure S22.**  $^{13}\text{C}\{^1\text{H}\}$  NMR spectrum of **M33** in  $\text{CDCl}_3$ .



**6-tert-butyl-4-(2-methylphenyl)-2-methyl-1-methoxyindane**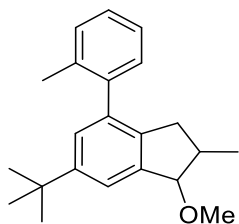

To a mixture of 1.80 g (2.0 mol. %) of  $\text{NiCl}_2(\text{PPh}_3)_2$  and 34.8 g (117 mmol) of 4-bromo-1-methoxy-6-*tert*-butyl-2-methylindane 150 ml (150 mmol) of 1.0 M *o*-tolylmagnesium bromide in THF was added at a such rate to maintain a gentle reflux. The resulting solution was refluxed for 30 min, then cooled to room temperature followed by addition of 300 ml of water and 400 ml of dichloromethane, then 200 ml of 1 M HCl. The organic layer was separated, and the aqueous layer was extracted with 150 ml of dichloromethane. The combined organic extract was evaporated to dryness to give a slightly greenish oil. The product was isolated by flash-chromatography on silica gel 60 (40-63  $\mu\text{m}$ ; eluent: hexanes-dichloromethane = 3:1, vol., then 1:1, vol.). This procedure gave 33.1 g (92%) of the title product as a lightly yellowish oily liquid which was a mixture of diastereomers A and b in ~1:1 molar ratio.  $^1\text{H}$  NMR ( $\text{CDCl}_3$ ):  $\delta$  7.38 (m, sum 2H in A and B), 7.28–7.12 (m, 10H in A and B), 4.59 (m) and 4.45 (d,  $J = 4.2$  Hz) sum 6H in A and B, 3.53 (br.s) and 3.48 (s) sum 6H in A and B, 3.00–2.32 (m, sum 3H in A and B), 2.12 (s) and 2.11 (s) = sum 6H in A and B, 1.341 (s) and 1.1336 (s) sum 18 H in A and B, 1.14 (br.d,  $J = 6.7$  Hz) and 1.03 (br.d) sum 6H in A and B.

**5-tert-butyl-2-methyl-7-(2-methylphenyl)-1H-indene**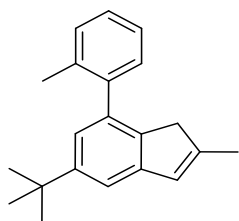

To a solution of 33.1 g (107.3 mmol) of 6-*tert*-butyl-4-(2-methylphenyl)-2-methyl-1-methoxyindane in 300 ml of toluene 250 mg of TsOH was added. The resulting solution was refluxed using Dean-Stark head for 10 min, then additional 200 mg of TsOH was added, and the reaction mixture was refluxed using Dean-Stark head for another 5 min. Then, it was cooled to room temperature, and finally washed by 100 ml of 10%  $\text{K}_2\text{CO}_3$ . The organic layer was separated, and the aqueous layer was extracted with 150 ml of dichloromethane. The combined organic extract was filtered through a short pad of silica gel 60 (40-63  $\mu\text{m}$ ) which was additionally washed by 2 x 50 ml of dichloromethane. The combined filtrate was evaporated under reduced pressure, and the residue was distilled in vacuum to give 24.9 g (84%) of the title product, b.p. 160  $^\circ\text{C}$ /5 mm Hg, as a slightly yellowish oil.  $^1\text{H}$  NMR ( $\text{CDCl}_3$ ):  $\delta$  7.39–7.26 (m, 5H), 7.06 (d,  $J = 1.7$  Hz, 1H), 6.59 (m, 1H), 3.11 (s, 2H), 2.23 (s, 3H), 2.16 (s, 3H), 1.42 (s, 9H).  $^{13}\text{C}\{^1\text{H}\}$  NMR ( $\text{CDCl}_3$ ):  $\delta$  149.54, 146.38, 145.80, 141.35, 138.74, 136.56, 135.71, 130.05, 129.23, 127.34, 127.10, 125.44, 122.07, 115.69, 41.85, 34.69, 31.68, 20.01, 16.75.

**bis[6-tert-butyl-2-methyl-4-(2-methylphenyl)-1H-inden-1-yl](dimethyl)-silane**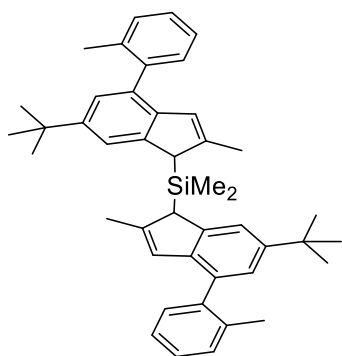

To a solution of 18.4 g (66.7 mmol) of 5-*tert*-butyl-2-methyl-7-(2-methylphenyl)-1H-indene in 250 ml of ether 27.5 ml (66.8 mmol) of 2.43 M  $n\text{BuLi}$  in hexanes was added in one portion at  $-78$   $^\circ\text{C}$ . This mixture was stirred overnight at room temperature, then the resulting suspension was cooled to  $-40$   $^\circ\text{C}$ , and 250 mg of  $\text{CuCN}$  was added. This mixture was stirred for 30 min at  $-25$   $^\circ\text{C}$ , then 4.30 g (33.3 mmol) of dichlorodimethylsilane was added in one portion. Thus obtained mixture was stirred overnight at ambient temperature, then filtered through a short pad of silica gel 60 (40-63  $\mu\text{m}$ ) which was additionally washed by 2 x 50 ml of dichloromethane. The combined filtrate was evaporated under reduced pressure, and the residue was dried in vacuum at elevated temperature. This procedure gave 20.3 g (ca. 100%) of the title product (ca. 95% purity by NMR, ~2:1 mixture of

diastereomers A and B) as a yellowish glassy solid, which was used further without additional purification. HRMS:  $[M]^+$  calc. for  $C_{44}H_{52}Si$ : 608.3838; found: 608.3822.  $^1H$  NMR ( $CDCl_3$ ):  $\delta$  7.64 (br.s) and 7.44 (br.s) sum 2H in A and B, 7.28 (8H in A and B), 7.15 (s, 2H in A and 2H in B), 6.31 (br.s, 2H in A and 2H in B), 3.83 (br.s) and 3.75 (br.s) sum 4H in A and B, 2.21 (br.s) and 2.17 (br.s) sum 12H in A and B, 1.36 (s) and 1.35 (s) sum 18H in A and B, -0.21 (br.s) and -0.27 (br.s) sum 6H in A and B.  $^{13}C\{^1H\}$  NMR ( $CDCl_3$ ):  $\delta$  146.9, 145.9, 145.5, 144.8, 141.4, 141.1, 141.0, 136.1, 133.1, 130.3, 129.9, 127.0, 125.8, 125.6, 123.4, 119.13, 119.08, 47.6, 47.5 (broad), 34.7, 31.8, 20.4, 18.0, 5.7 (broad).

***rac*-dimethylsilanediy[bis( $\eta^5$ -6-*tert*-butyl-4-(2-methylphenyl)-2-methylinden-1-yl)]zirconium dichloride (M34)**

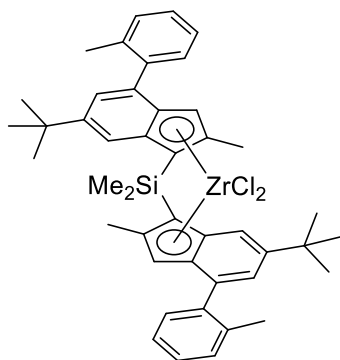

To a cooled to -60 °C solution of 20.3 g (33.4 mmol) of bis[6-*tert*-butyl-4-(2-methylphenyl)-2-methyl-1*H*-inden-1-yl](dimethyl)silane in 250 ml of ether 27.5 ml (66.8 mmol) of 2.43 M  $n$ BuLi in hexanes was added in one portion. This mixture was stirred overnight at room temperature. The resulting light-red solution was cooled to -78 °C, and 7.77 g (33.34 mmol) of  $ZrCl_4$  was added. This mixture was stirred for 24 h, then evaporated to dryness, the residue was heated with 200 ml of toluene. Thus obtained hot suspension was filtered through glass frit (G4). The filtrate was evaporated to 50 ml, and 50 ml of *n*-hexane was added. Yellow solid precipitated

overnight at room temperature was filtered off and then dried in vacuum to give 2.20 g (9%) of *meso*-complex. The mother liquor was evaporated to ca. 40 ml and heated to dissolve the precipitated solid. Yellow solid precipitated overnight at room temperature was filtered off and dried in vacuum. This procedure gave a ca. 5:1 mixture of *rac*- and *meso*-zirconocenes which was dissolved in 30 ml of hot toluene. Yellow crystals precipitated from this solution overnight at room temperature were filtered off and dried in vacuum to give 2.70 g (11%) of *rac*-complex. Further on, yellow crystals precipitated from the mother liquor for one week at room temperature were collected and dried in vacuum to give 5.00 g (20%) of a ca. 1:2 mixture of *rac*- and *meso*-zirconocenes. All remaining mother liquors were combined, evaporated to ca. 10 ml, and triturated with 40 ml of *n*-hexane. Yellow precipitate formed was filtered off (G3) and dried in vacuum to give 6.10 g (24%) of a ca. 3:2 mixture of *rac*- and *meso*-zirconocenes. Thus, the total yield of *rac*- and *meso*-zirconocenes isolated in this synthesis was 16.0 g (62%). *Rac*-zirconocene. Anal. calc. for  $C_{44}H_{50}Cl_2SiZr$ : C, 68.71; H, 6.55. Found: C, 69.23; H, 6.63.  $^1H$  NMR ( $CDCl_3$ ):  $\delta$  7.60 (br.s, 2H), 7.55 (s, 2H), 7.34 (d,  $J = 0.9$  Hz, 2H), 7.29–7.22 (m, 6H), 6.51 (br.s, 2H), 2.26 (s, 6H), 2.13 (br.s, 6H), 1.33 (s, 6H), 1.29 (s, 18H).  $^{13}C\{^1H\}$  NMR ( $CDCl_3$ ):  $\delta$  147.99, 139.13, 136.44, 135.42, 134.56, 132.15, 130.04, 129.71, 127.90, 127.43, 126.81, 125.95, 121.66, 118.51, 82.28, 35.06, 30.66, 20.18, 18.54, 2.65.

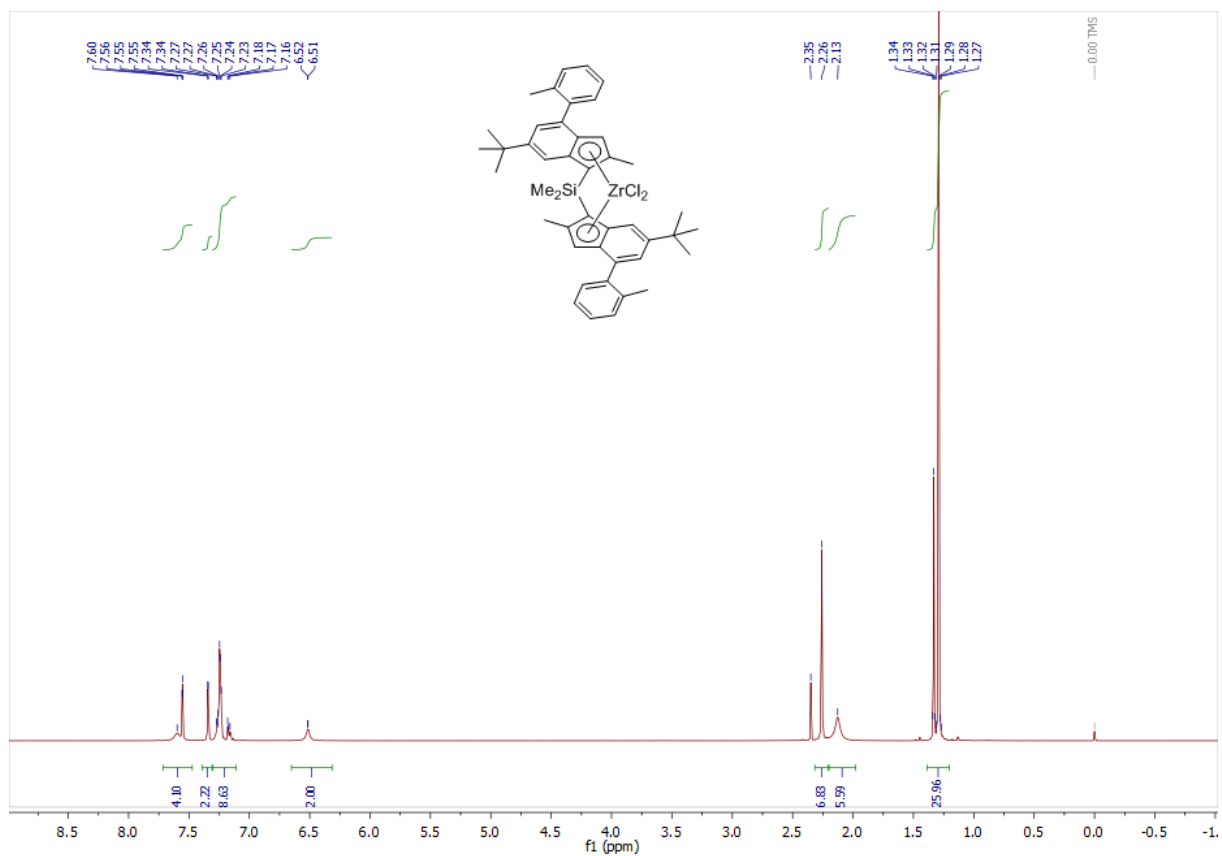

**Figure S23.** <sup>1</sup>H NMR spectrum of **M34** in CDCl<sub>3</sub>. Traces of toluene are visible at 2.36 and 7.13–7.26 ppm.

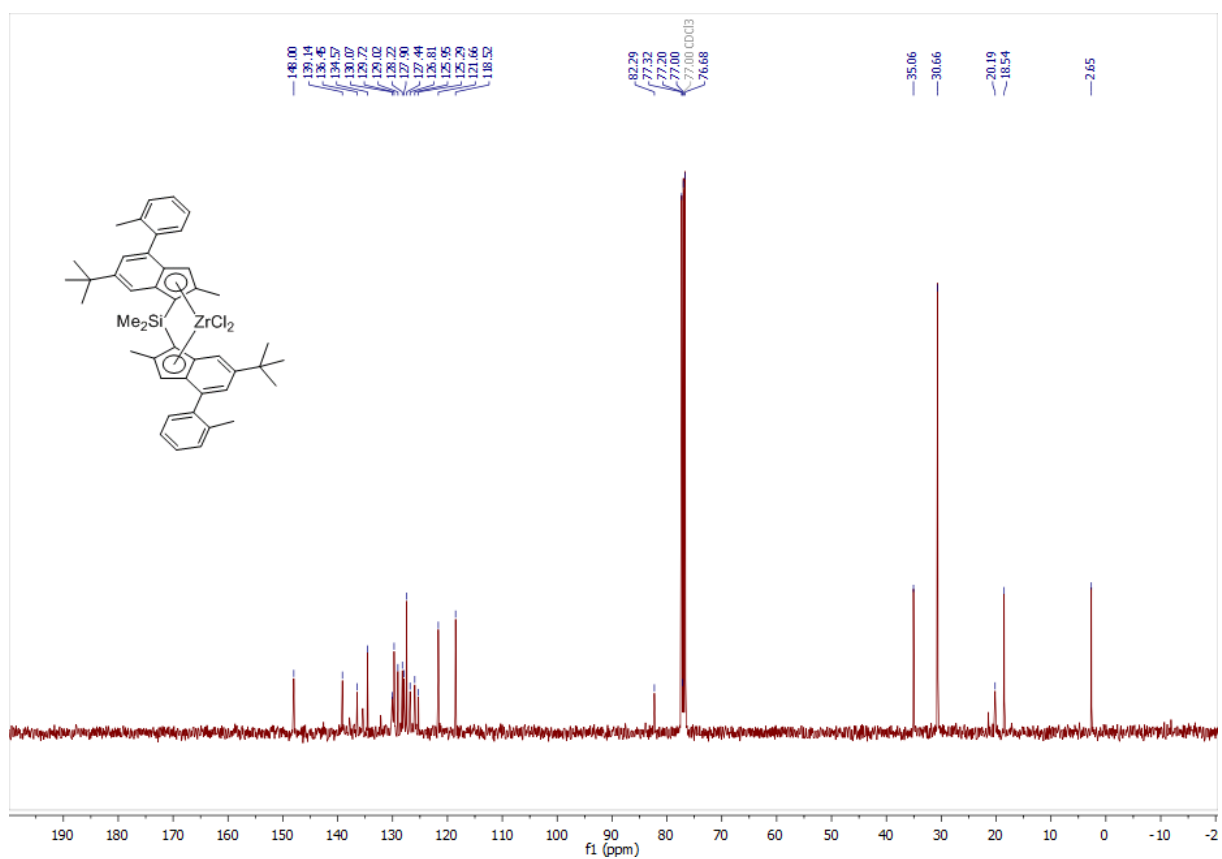

**Figure S24.** <sup>13</sup>C{<sup>1</sup>H} NMR spectrum of **M34** in CDCl<sub>3</sub>.

## M35

**6-chloro-4-(*o*-tolyl)-2-methyl-1H-indene**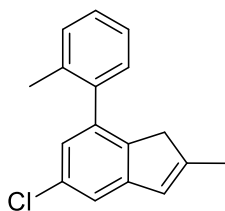

To a solution of zinc chloride (7.76 g, 56.9 mmol) in THF (200 ml) *o*-tolylmagnesium bromide (45.5 ml, 1.0M in THF, 45.5 mmol) and Pd[P(<sup>*t*</sup>Bu<sub>3</sub>)<sub>2</sub>] (770 mg, 1.5 mmol) were added. To the resulting solution 2-methyl-4-bromo-6-chloro-1*H*-indene (9.24 g, 37.9 mmol) was added. The mixture was refluxed for 6 h, then cooled to room temperature. Water (200 ml) and dichloromethane (300 ml) were added to the reaction mixture followed by 1 M HCl (100 ml).

The organic layer was separated, and the aqueous layer was extracted with 250 ml of dichloromethane. The combined organic phase was evaporated to dryness to give a slightly yellowish oil. The product was isolated by flash-chromatography on silica gel 60 (40-63 μm; eluent: hexanes). This procedure gave 9.0 g (93%) of the title product as a colorless solid. <sup>1</sup>H NMR (CDCl<sub>3</sub>): δ 7.31 (m, 2H), 7.29–7.26 (m, 1H), 7.25 (d, *J* = 1.9 Hz, 1H), 7.22–7.19 (m, 1H), 6.99 (d, *J* = 1.9 Hz, 1H), 6.51 (m, 1H), 3.05 (br.s, 2 H), 2.18 (s, 3 H), 2.13 (br.s, 3 H).

**bis[6-chloro-2-methyl-4-(2-methylphenyl)-1H-inden-1-yl]dimethylsilane**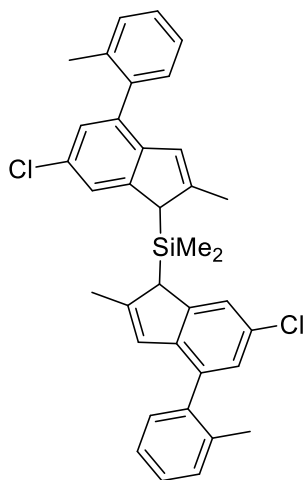

To a solution of 9.00 g (35.3 mmol) of 6-chloro-2-methyl-4-(2-methylphenyl)-1*H*-indene in 300 ml of ether 14.1 ml (35.3 mmol) of 2.5 M <sup>*n*</sup>BuLi in hexanes was added in one portion at -40 °C. This mixture was stirred overnight at room temperature, then cooled to -80 °C, and 50 mg of *N*-methylimidazole was added. The resulting mixture was stirred for 5 min at -80 °C, then 2.28 g (17.7 mmol) of dichlorodimethylsilane was added in one portion. Further on, this mixture was stirred overnight at ambient temperature. The resulting mixture was filtered through a short pad of silica gel 60 (40-63 μm) which was additionally washed by 2 x 30 ml of dichloromethane. The combined filtrate was evaporated under reduced pressure, and the residue was purified by flash chromatography on silica gel 60 (40-63 μm, eluent: hexane:dichloromethane; 10:1, vol.). Yield 3.00 g (30%) of the product as yellowish foam. According to <sup>1</sup>H NMR, the product

was a mixture of two diastereomers A and B in ~2:1 molar ratio. <sup>1</sup>H NMR (CDCl<sub>3</sub>): δ 7.37–7.16 (m, 10H in A and 10 H in B), 7.12 (br.s, 2H in A and 2H in B), 6.29 (br.s, 2H in A and 2H in B), 3.79 (br.s, 2H in A), 3.74 (br.s, 2H in B), 2.23 and 2.17 and 2.15 (3 br.s, sum 12H in A and B), -0.19 and -0.22 (2 br.s, sum 6H in A and B).

***rac*-dimethylsilanediylbis[η<sup>5</sup>-2-methyl-6-chloro-4-(2-methylphenyl)-inden-1-yl]zirconium dichloride (M35)**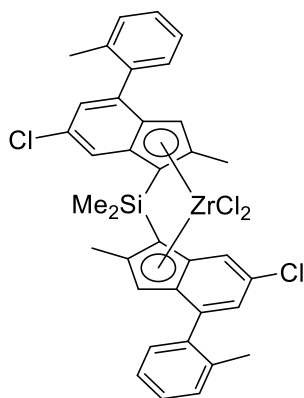

To a cooled to -40 °C solution of 3.00 g (5.30 mmol) of bis(2-methyl-6-chloro-4-(2-methylphenyl)-1*H*-inden-1-yl)dimethylsilane in 250 ml of ether 4.24 ml (10.6 mmol) of 2.5 M <sup>*n*</sup>BuLi in hexanes was added in one portion. This mixture was stirred overnight at room temperature, then cooled to -80 °C, and 2.00 g (5.30 mmol) of ZrCl<sub>4</sub>(THF)<sub>2</sub> was added. The reaction mixture was stirred for 24 h, then evaporated to dryness. The residue was heated with 250 ml of toluene, and the formed hot suspension was filtered through glass frit (G4). The filtrate was evaporated to dryness. The resulting solid was recrystallized from toluene yielding 460 mg (12%) of *rac*-complex as a yellow powder.

Anal. calc. for C<sub>36</sub>H<sub>32</sub>Cl<sub>4</sub>SiZr: C, 59.58; H, 4.44. Found: C, 59.78; H, 4.57. <sup>1</sup>H NMR (CDCl<sub>3</sub>): δ 7.58 (s, 2H), 7.55–7.40 (m, 2H), 7.33–7.13 (m, 8H), 6.71–6.41 (m, 2H), 2.26 (s, 6H), 2.19–1.96 (m, 6H), 1.31 (s,

6H).  $^{13}\text{C}\{^1\text{H}\}$  NMR ( $\text{C}_6\text{D}_6$ ):  $\delta$  139.7, 137.9, 135.9, 135.4, 132.3, 132.2, 130.4, 129.8, 129.1, 128.5, 127.1, 126.5, 122.8, 122.6, 83.8, 19.9, 18.3, 1.7.

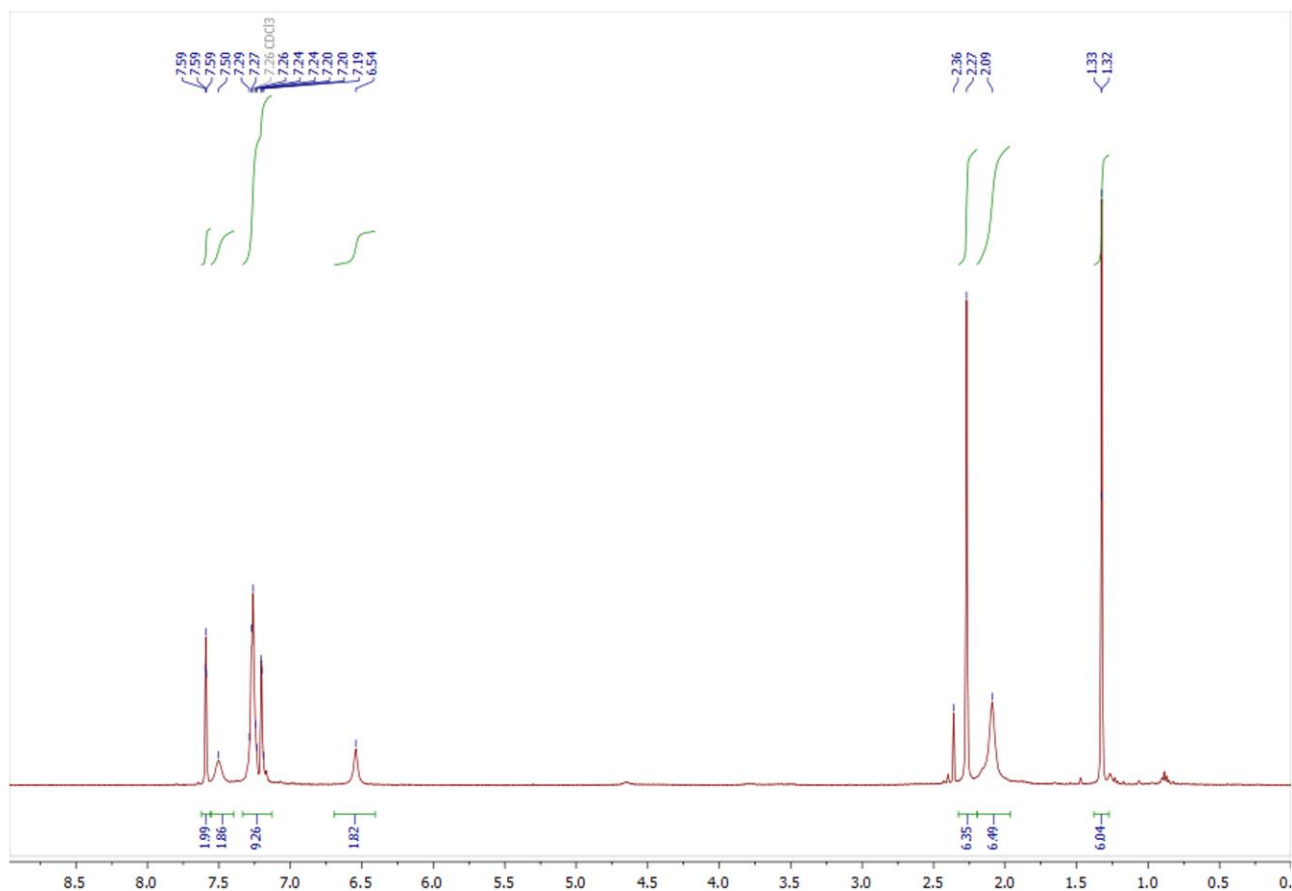

**Figure S25.**  $^1\text{H}$  NMR spectrum of **M35** in  $\text{CDCl}_3$ . Traces of toluene are visible at 2.36 and 7.13–7.26 ppm.



***rac*-dimethylsilanediy[bis( $\eta^5$ -2-isopropyl-4-phenyl-inden-1-yl)]zirconium dichloride (M36)**

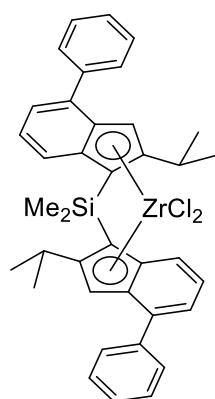

To a solution of 7.70 g (14.7 mmol) of bis(2-isopropyl-4-phenyl-1H-inden-1-yl)dimethylsilane in 250 ml of Et<sub>2</sub>O, cooled to -40 °C, 11.7 ml (29.3 mmol) of 2.5 M *n*BuLi in hexanes was added in one portion. This mixture was stirred overnight at room temperature. The resulting light-yellow solution was cooled to -80 °C and 5.54 g (14.7 mmol) of ZrCl<sub>4</sub>(THF)<sub>2</sub> was added. The reaction mixture was stirred for 24 h resulting in orange solution with light-orange precipitate. The resulting light-orange slightly turbid solution was evaporated to dryness, the residue was heated with 250 ml of toluene and this mixture was filtered while hot through glass frit (G4). The filtrate was evaporated to dryness. The resulting solid was recrystallized from toluene yielding 185 mg (1.8%) of a *rac*-dimethylsilanediy[bis( $\eta^5$ -2-isopropyl-4-phenyl-inden-1-yl)]zirconium dichloride as

orange crystals. Anal. calc. for C<sub>38</sub>H<sub>38</sub>Cl<sub>2</sub>SiZr: C, 66.64; H, 5.59. Found: C, 66.72; H, 5.53. <sup>1</sup>H NMR (C<sub>6</sub>D<sub>6</sub>):  $\delta$  7.91 (m, 4H), 7.41 (d, *J* = 8.7 Hz, 2H), 7.31 (d, *J* = 7.0 Hz, 2H), 7.22 (m, 4H), 7.08 (m, 2H), 6.87 (dd, *J* = 8.7 Hz, *J* = 7.0 Hz, 2H), 3.08 (m, 2H), 1.11 (d, *J* = 6.6 Hz, 6H), 0.95 (d, *J* = 6.8 Hz, 6H), 0.93 (s, 6H). <sup>13</sup>C{<sup>1</sup>H} NMR (C<sub>6</sub>D<sub>6</sub>):  $\delta$  149.6, 140.3, 140.2, 132.3, 129.2, 129.1, 128.12, 128.06, 126.8, 126.4, 123.9, 115.6, 82.3, 30.6, 29.2, 19.8, 3.6.

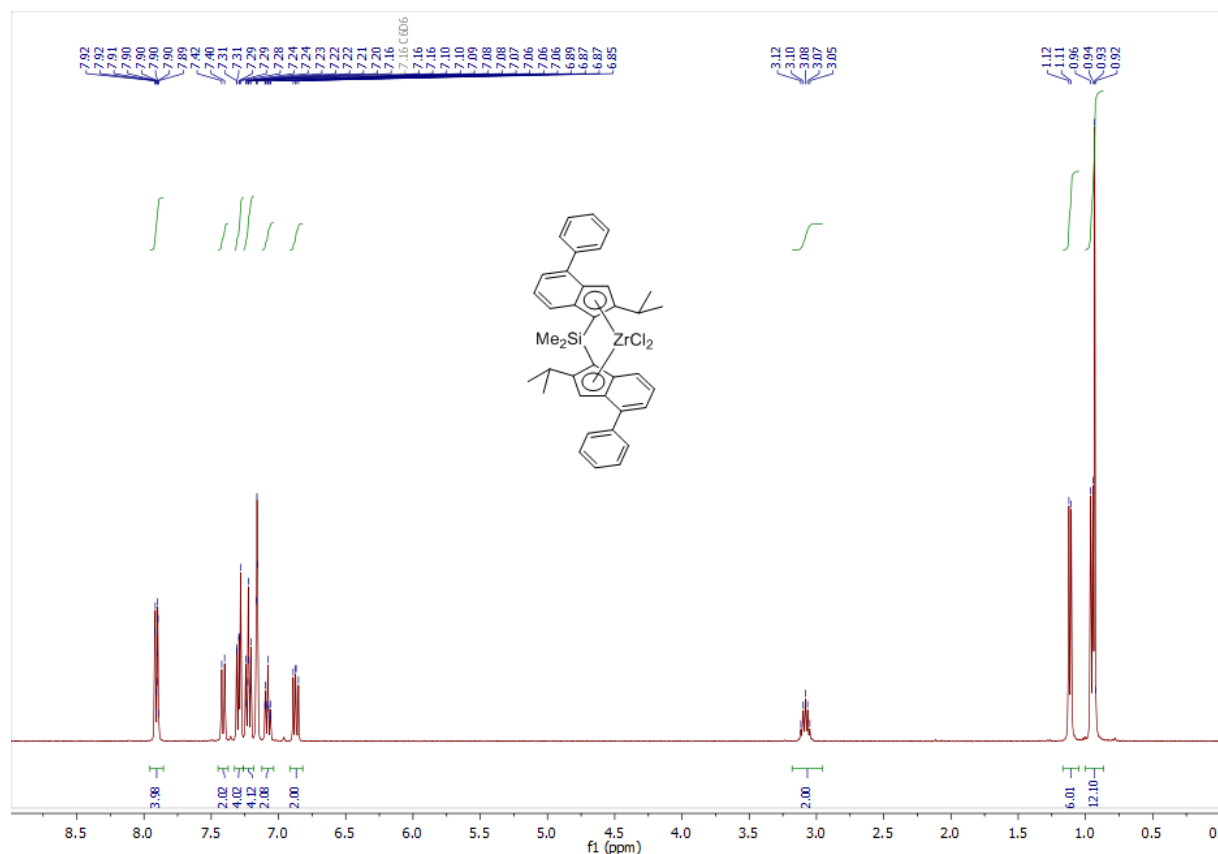

**Figure S27.** <sup>1</sup>H NMR spectrum of M36 in C<sub>6</sub>D<sub>6</sub>.

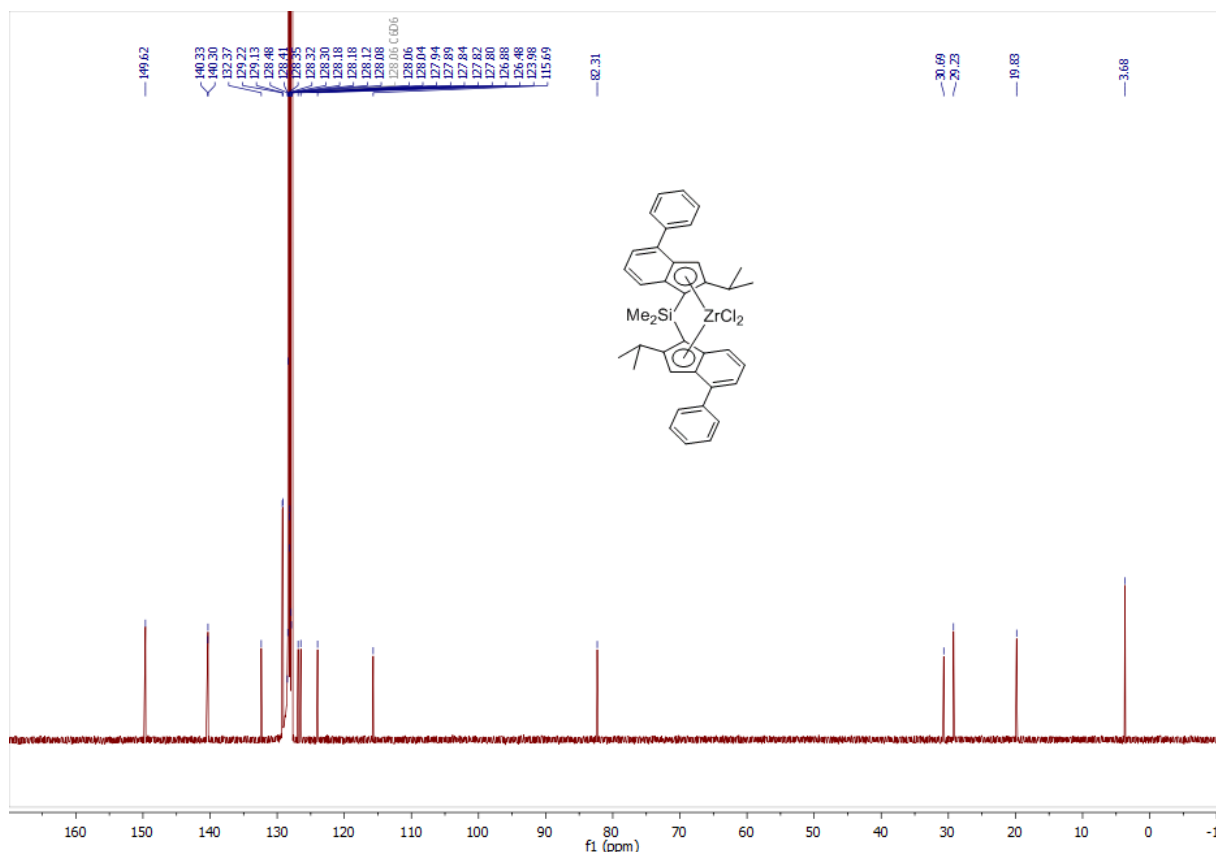

**Figure S28.**  $^{13}\text{C}\{^1\text{H}\}$  NMR spectrum of **M36** in  $\text{C}_6\text{D}_6$ .

### M39

#### bis(2,6-dimethyl-4-(3,5-di-*tert*-butylphenyl)-1*H*-inden-1-yl)diethylsilane

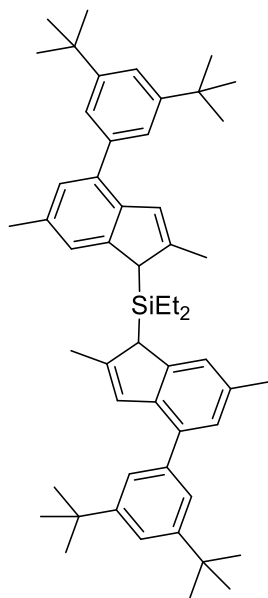

To a solution of 8.70 g (26.2 mmol) of 2,6-dimethyl-4-(3,5-di-*tert*-butylphenyl)-1*H*-indene in 200 ml of ether 10.5 ml (26.2 mmol) of 2.5 M  $n\text{BuLi}$  in hexanes was added in one portion at  $-40^\circ\text{C}$ . This mixture was stirred overnight at room temperature, then the resulting light-orange solution was cooled to  $-40^\circ\text{C}$ , and 1.17 g (13.1 mmol) of  $\text{CuCN}$  was added. The resulting mixture was stirred for 30 min at  $-25^\circ\text{C}$ , then 2.06 g (13.1 mmol) of dichlorodiethylsilane was added in one portion. Further on, this mixture was stirred overnight at ambient temperature. The resulting mixture was filtered through a short pad of silica gel 60 (40-63  $\mu\text{m}$ ) which was additionally washed by 2 x 30 ml of dichloromethane. The combined filtrate was evaporated under reduced pressure, and the residue was purified by flash chromatography on silica gel 60 (40-63  $\mu\text{m}$ , eluent: hexane:dichloromethane, 10:1 vol). Yield 4.64 g (47%) of the product as a white foam. According to  $^1\text{H}$  NMR, the product was a mixture of *rac*- and *meso*-isomers in ca. 1:1 molar ratio. Anal. calc. for  $\text{C}_{54}\text{H}_{72}\text{Si}$ : C, 86.57; H, 9.69. Found: C, 86.51; H, 9.80.  $^1\text{H}$  NMR ( $\text{CDCl}_3$ ):  $\delta$  7.45–7.35 (m, 6H), 7.21 (s, 1H), 7.12 (s, 1H), 7.15 (s, 1H), 7.02 (s, 1H), 6.76 (s, 1H), 6.80 (s, 1H), 3.65 (s, 1H), 3.60 (s, 1H), 2.44 (s, 3H), 2.46 (s, 3H), 2.26 (s, 3H), 2.15 (s, 3H), 1.41 and 1.40 (s and s, sum 36H), 0.89–0.61 (m, 10H).



***rac*-diethylsilanediylbis[ $\eta^5$ -2,6-dimethyl-4-(3,5-di-*tert*-butylphenyl)-inden-1-yl]zirconium dichloride (M39)**

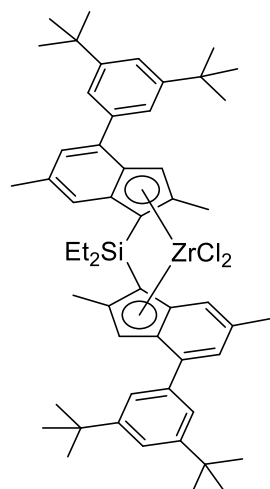

To a cooled to  $-40\text{ }^{\circ}\text{C}$  solution of 4.64 g (6.19 mmol) of bis(4-(3,5-di-*tert*-butylphenyl)-2,6-dimethyl-1*H*-inden-1-yl)diethylsilane in 150 ml of ether 4.95 ml (12.4 mmol) of 2.5 M  $n\text{BuLi}$  in hexanes was added in one portion. This mixture was stirred overnight at room temperature. The resulting light-yellow solution was cooled to  $-80\text{ }^{\circ}\text{C}$ , and 2.33 g (6.19 mmol) of  $\text{ZrCl}_4(\text{THF})_2$  was added. The reaction mixture was stirred for 24 h and then evaporated to dryness. The residue was heated with 100 ml of toluene, and the formed hot suspension was filtered through glass frit (G4). The filtrate was evaporated to dryness giving 3.23 g of a ca. 1:1 mixture of *rac*- and *meso*-complexes. This crude product was recrystallized twice from 100 ml of methylcyclohexane/hexane mixture (1:1 vol.) yielding 310 mg (5.5%) of *rac*-complex as a yellow powder. Anal. calc. for  $\text{C}_{54}\text{H}_{70}\text{Cl}_2\text{SiZr}$ : C, 71.32; H, 7.76. Found: C, 71.15; H, 7.92.  $^1\text{H}$  NMR ( $\text{CDCl}_3$ ):  $\delta$  7.50 (d,  $J = 1.7\text{ Hz}$ , 4H), 7.41–7.34 (m, 4H), 7.23 (br.s, 2H), 6.91 (s, 2H), 2.38 (s, 6H), 2.23 (s, 6H), 1.98–1.77 (m, 4H), 1.46 (t,  $J = 7.8\text{ Hz}$ , 6H), 1.31 (s, 36H).  $^{13}\text{C}\{^1\text{H}\}$  NMR ( $\text{CD}_2\text{Cl}_2$ ):  $\delta$  152.8, 140.5, 140.1, 137.6, 137.0, 131.8, 130.5, 129.7, 124.8, 124.5, 124.4, 123.0, 36.5, 32.8, 23.4, 7.9, 7.1.

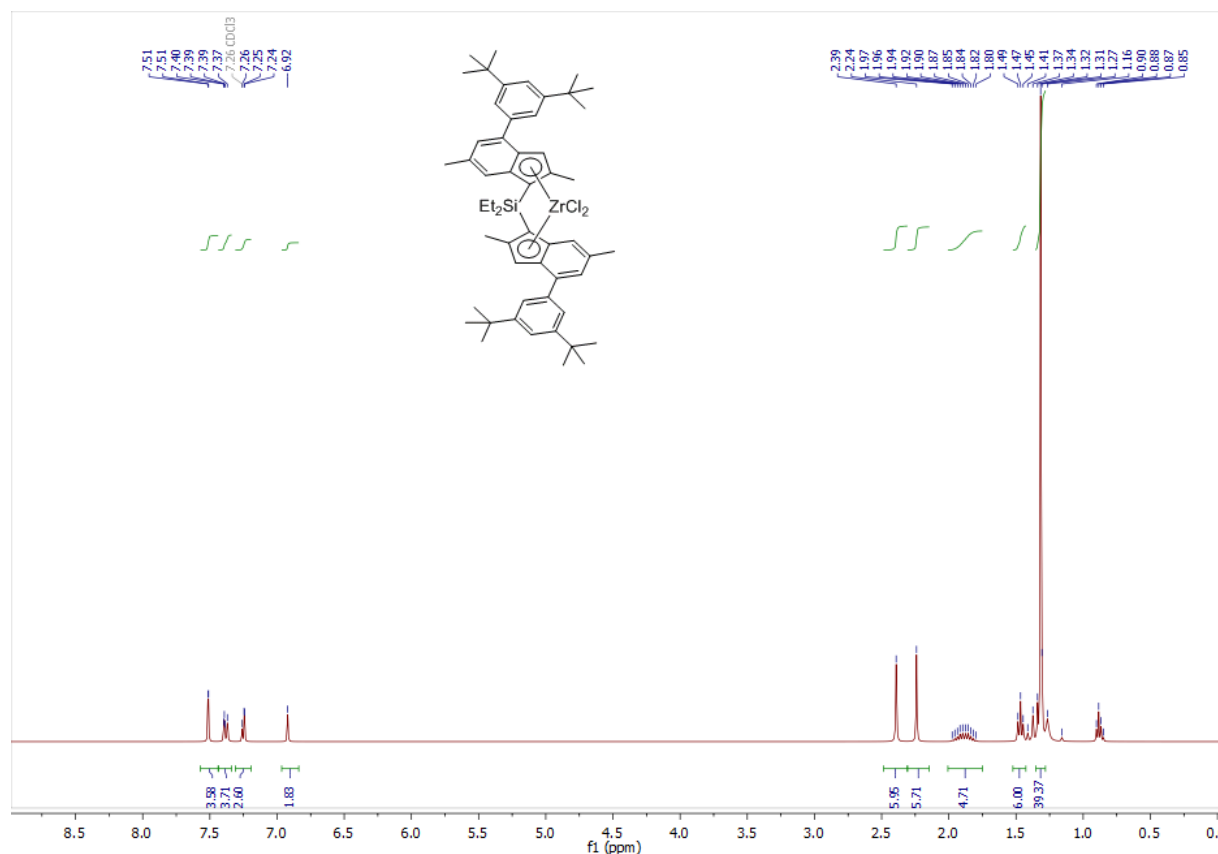

**Figure S29.**  $^1\text{H}$  NMR spectrum of M39 in  $\text{CDCl}_3$ .

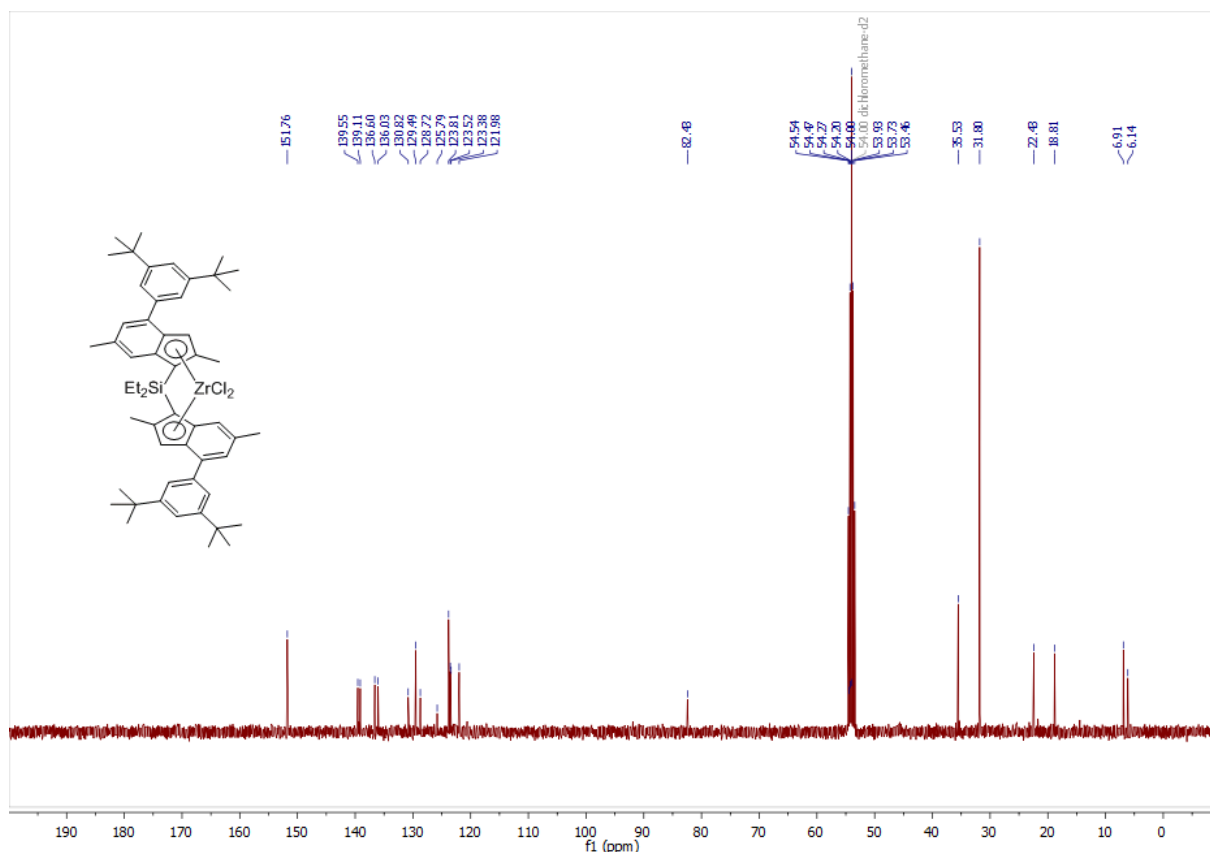

**Figure S30.**  $^{13}\text{C}\{^1\text{H}\}$  NMR spectrum of **M39** in  $\text{CDCl}_3$ .

## M40

### 2-bromo-4-methylbenzaldehyde

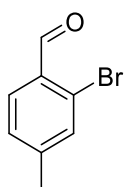

To a solution of 2-bromo-1-iodo-4-methylbenzene (50.0 g, 168 mmol) in THF (500 ml) cooled to  $-60^\circ\text{C}$   $i\text{PrMgCl}\cdot\text{LiCl}$  (195 ml of 0.95 M in THF, 185 mmol) was added for 1 h. Then  $N,N$ -dimethylformamide (18.5 g, 253 mmol) was added at the same temperature. After 30 min of stirring at room temperature the resulting mixture was poured into water (1000 ml) and extracted with diethyl ether ( $3 \times 100$  ml). The combined organic extracts were dried over  $\text{Na}_2\text{SO}_4$  and the solvents were removed in vacuum. Distillation of the residue in vacuum afforded 26.4 g (79%) of the product as a colorless oil, b.p.  $110\text{--}130^\circ\text{C}/1$  mbar.  $^1\text{H}$  NMR (600 MHz,  $\text{CDCl}_3$ ):  $\delta$  10.18 (s, 1H), 7.69 (d,  $J=7.9$  Hz, 1H), 7.35 (s, 1H), 7.12 (d,  $J=7.9$  Hz, 1H), 2.30 (s, 3H).  $^{13}\text{C}\{^1\text{H}\}$  NMR (151 MHz,  $\text{CDCl}_3$ ):  $\delta$  191.0, 146.6, 133.9, 130.9, 129.4, 128.6, 126.8, 21.2.

### 2-bromo-1-(chloromethyl)-4-methylbenzene

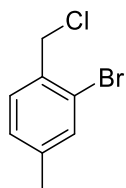

To a solution of 2-bromo-4-methylbenzaldehyde (25.5 g, 128 mmol) in THF (200 ml) cooled to  $5^\circ\text{C}$   $\text{NaBH}_4$  (7.28 g, 192 mmol) was added. Then, methanol (100 ml) was added dropwise to this mixture under vigorous stirring at  $5^\circ\text{C}$  for ca. 3 h. The solvents were then removed in vacuum, and the residue was dissolved in a mixture of dichloromethane (200 ml) and water (100 ml). The mixture was acidified with 4M HCl to pH 5. The organic phase was separated, and the aqueous layer was additionally extracted with dichloromethane ( $2 \times 100$  ml). The combined organic phase was dried over  $\text{Na}_2\text{SO}_4$  and evaporated to dryness in vacuum to give a colorless liquid which was diluted with dichloromethane (200 ml). Then thionyl chloride (18.3 g, 154

mmol) was added dropwise for 30 min. After 30 min of stirring at room temperature, the resulting mixture was poured into water (500 ml) and extracted with dichloromethane (3 × 100 ml). The extract was washed with 10% aqueous K<sub>2</sub>CO<sub>3</sub>, dried over Na<sub>2</sub>SO<sub>4</sub> and then passed through a short pad of silica gel 60 (40–63 μm). The silica gel layer was additionally washed with dichloromethane (100 ml). The combined organic filtrate was evaporated in vacuum. Distillation of the residue in vacuum afforded 24.0 g (89%) of the product as a colorless oil, b.p. 68–72 °C/1 mbar. <sup>1</sup>H NMR (400 MHz, CDCl<sub>3</sub>): δ 7.42 (d, *J*=0.9 Hz, 1H), 7.34 (d, *J*=7.8 Hz, 1H), 7.11 (dd, *J*=7.8 Hz, *J*=0.9 Hz, 1H), 4.68 (s, 2H), 2.33 (s, 3H). <sup>13</sup>C{<sup>1</sup>H} NMR (101 MHz, CDCl<sub>3</sub>): δ 140.4, 133.6, 133.5, 130.6, 128.6, 123.9, 46.0, 20.7.

#### 2-(2-bromo-4-methylbenzyl)butanoyl chloride

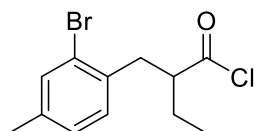

To a suspension of sodium hydride (4.75 g of 60% dispersion in mineral oil, 119 mmol), in THF (500 ml) cooled to 0 °C, diethyl ethylmalonate (24.4 g, 129 mmol) was added. After 30 min of stirring at r.t., 2-bromo-1-(chloromethyl)-4-methylbenzene (23.7 g, 108 mmol) was added for

1 h. The resulting mixture was stirred overnight at 60 °C and the solvents were removed in vacuum. To the residue 500 ml of water was added and the mixture was extracted with dichloromethane (3 × 150 ml). The combined organic extracts were stripped of solvent in vacuum and the residue was dissolved in ethanol (200 ml, 95%). Then aqueous potassium hydroxide (18.2 g, 324 mmol in 60 ml of water) was added carefully. The resulting mixture was refluxed for 6 h, then diluted with water (300 ml), and most of the ethanol was distilled off. Water (200 ml) was added followed by acidification with 4M HCl to pH 1. The crude product was extracted with dichloromethane (3 × 150 ml), the combined organic extract was dried over Na<sub>2</sub>SO<sub>4</sub> and the solvents were removed in vacuum. The residue was heated to 200 °C and kept at this temperature until evolution of gas ceased. To the residue thionyl chloride (38.6 g, 324 mmol) was added. The mixture was stirred overnight at r.t., then the excess of thionyl chloride was distilled off. Distillation of the residue in vacuum afforded 27.8 g (89%) of the product as a greenish oil, b.p. 105–118 °C/1 mbar. <sup>1</sup>H NMR (400 MHz, CDCl<sub>3</sub>): δ 7.38 (d, *J*=0.9 Hz, 1H), 7.11 (d, *J*=7.8 Hz, 1H), 7.04 (dd, *J*=7.8 Hz, *J*=0.9 Hz, 1H), 3.23–3.15 (m, 1H), 3.15–3.08 (m, 1H), 2.94 (dd, *J*=13.7 Hz, *J*=6.1 Hz, 1H), 2.30 (s, 3H), 1.90–1.75 (m, 1H), 1.80–1.65 (m, 1H), 1.02 (t, *J*=7.4 Hz, 3H). <sup>13</sup>C{<sup>1</sup>H} NMR (101 MHz, CDCl<sub>3</sub>): δ 176.1, 138.4, 133.5, 133.1, 130.7, 128.0, 123.9, 58.1, 36.9, 24.6, 20.2, 10.7.

#### 4-bromo-2-ethyl-6-methylindan-1-one

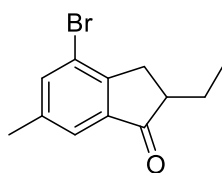

To a suspension of AlCl<sub>3</sub> (16.0 g, 120 mmol) in dichloromethane (100 ml) cooled to 0 °C a solution of 2-(2-bromo-4-methylbenzyl)butanoyl chloride (27.8 g, 96.0 mmol) in dichloromethane (50 ml) was added dropwise for 2 h. After stirring overnight the obtained mixture was poured into 200 g of crushed ice and acidified with 5 ml of concentrated HCl. The

organic phase was separated and the water phase was extracted with dichloromethane (3 × 50 ml). The combined organic phases were passed through a short layer of silica gel. Solvents were removed from the filtrate in vacuum. Distillation of the residue in vacuum afforded 21.3 g (88%) of the product as a yellowish oil, b.p. 105–115 °C/1 mbar. <sup>1</sup>H NMR (400 MHz, CDCl<sub>3</sub>): δ 7.54 (s, 1H), 7.44 (s, 1H), 3.17 (dd, *J*=17.3 Hz, *J*=7.7 Hz, 1H), 2.68–2.56 (m, 2H), 2.35 (s, 3H), 1.99–1.88 (m, 1H), 1.57–1.45 (m, 1H), 0.98 (t, *J*=7.4 Hz, 3H). <sup>13</sup>C{<sup>1</sup>H} NMR (101 MHz, CDCl<sub>3</sub>): δ 208.0, 150.6, 139.5, 138.8, 138.1, 122.8, 121.6, 49.0, 32.9, 24.3, 20.7, 11.5.

#### 4-(3,5-di-*tert*-butylphenyl)-2-ethyl-6-methylindan-1-one

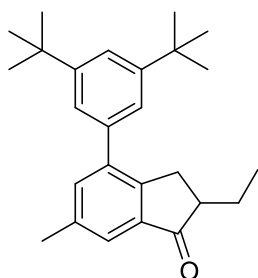

To a solution of 4-bromo-2-ethyl-6-methylindan-1-one (12.5 g, 49.4 mmol) in 1,4-dioxane (200 ml) 2-(3,5-di-*tert*-butylphenyl)-4,4,5,5-tetramethyl-1,3,2-dioxaborolane (23.4 g, 74.1 mmol), cesium carbonate (48.3 g, 148 mmol), and water (100 ml) were subsequently added. The obtained mixture was purged with argon for 10 min followed by addition of Pd(PPh<sub>3</sub>)<sub>4</sub> (2.85 g, 2.47 mmol). The mixture was stirred for 12 h at 90 °C, then cooled to room temperature, and diluted with 50 ml of water. The mixture was extracted with

dichloromethane (3 × 100 ml). The combined organic extract was dried over Na<sub>2</sub>SO<sub>4</sub> and the solvent was removed in vacuum. The residue was purified by flash chromatography on silica gel 60 (40–63 μm, eluent: hexane-ethyl acetate = 20:1, vol). Yield 14.4 g (80%) of the product as a white powder. <sup>1</sup>H NMR (400 MHz, CDCl<sub>3</sub>): δ 7.60 (br.s, 1H), 7.51 (t, *J*=1.7 Hz, 1H), 7.48 (d, *J*=1.0 Hz, 1H), 7.34 (d, *J*=1.8 Hz, 2H), 3.37 (dd, *J*=17.2 Hz, *J*=7.8 Hz, 1 H), 2.84 (dd, *J*=17.2 Hz, *J*=3.7 Hz, 1 H), 2.66 (m, *J*=8.4 Hz, *J*=4.2 Hz, 1 H), 2.50 (s, 3 H), 2.07–1.95 (m, 1H), 1.63–1.50 (m, 1H), 1.43 (s, 18H), 1.02 (t, *J*=7.4 Hz, 3 H). <sup>13</sup>C{<sup>1</sup>H} NMR (101 MHz, CDCl<sub>3</sub>): δ 209.1, 150.9, 148.7, 141.0, 138.5, 137.7, 137.6, 136.0, 122.8, 122.5, 121.4, 49.2, 34.9, 32.0, 31.5, 24.4, 21.1, 11.6.

#### 7-(3,5-di-*tert*-butylphenyl)-2-ethyl-5-methyl-1H-indene

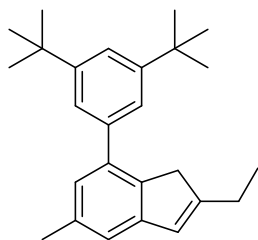

To a solution 4-(3,5-di-*tert*-butylphenyl)-2-ethyl-6-methylindan-1-one (14.4 g, 39.6 mmol) in THF (100 ml) cooled to 5 °C, NaBH<sub>4</sub> (2.25 g, 59.4 mmol) was added. Further on, methanol (50 ml) was added dropwise to this mixture under vigorous stirring at 5 °C for ca. 3 h. Then, the solvents were removed in vacuum, and to the residue dichloromethane (200 ml) and water (100 ml) were added. The mixture was acidified to pH 5 with 4M HCl. The organic layer was

separated, the aqueous layer was additionally extracted with dichloromethane (2 × 50 ml). The combined organic phase was dried over Na<sub>2</sub>SO<sub>4</sub> and evaporated to dryness in vacuum. The residue was dissolved in warm (40–50 °C) toluene (100 ml), and TsOH (0.05 g) was added. The mixture was refluxed with Dean-Stark head for 10 min, and then cooled to room temperature using external ice-water bath. The resulting solution was passed through a short layer of silica gel 60 (40–63 μm), the silica gel layer was additionally washed with 100 ml of dichloromethane. The combined organic filtrate was evaporated to dryness and the residue was additionally purified by flash chromatography on silica gel 60 (40–63 μm; eluent: hexane). Yield 13.0 g (95%) of the product as a white solid. <sup>1</sup>H NMR (400 MHz, CDCl<sub>3</sub>): δ 7.56 (t, *J*=1.8 Hz, 1H), 7.54 (d, *J*=1.8 Hz, 2H), 7.24 (s, 1H), 7.15 (s, 1H), 6.64 (br.s, 1H), 3.51 (s, 2H), 2.61 (q, *J*=7.4 Hz, 2H), 2.58 (s, 3H), 1.52 (s, 18H), 1.33 (t, *J*=7.5 Hz, 3H). <sup>13</sup>C{<sup>1</sup>H} NMR (101 MHz, CDCl<sub>3</sub>): δ 152.9, 150.5, 146.5, 140.6, 138.3, 137.7, 136.5, 125.18, 125.16, 122.8, 120.8, 119.7, 40.7, 34.9, 31.6, 24.3, 21.5, 13.3.

**bis(4-(3,5-di-*tert*-butylphenyl)-2-ethyl-6-methyl-1H-inden-1-yl)diethylsilane**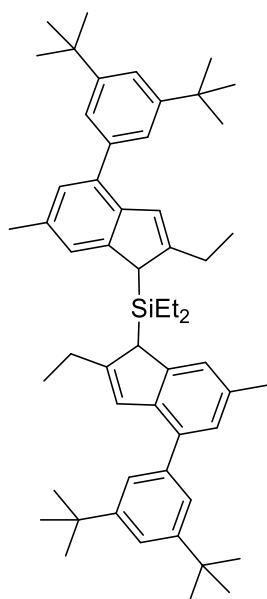

To a solution of 7-(3,5-di-*tert*-butylphenyl)-2-ethyl-5-methyl-1*H*-indene (12.9 g, 37.2 mmol) in ether (150 ml) *n*BuLi (14.9 ml of 2.5 M in hexanes, 37.2 mmol) was added in one portion at  $-40^{\circ}\text{C}$ . This mixture was stirred overnight at r.t. and THF (20 ml) was added. The mixture was cooled to  $-40^{\circ}\text{C}$ , and CuCN (1.66 g, 18.6 mmol) was added. The mixture was stirred for 30 min at  $-25^{\circ}\text{C}$ , then dichlorodiethylsilane (2.92 g, 18.6 mmol) was added in one portion, and the mixture was stirred overnight at ambient temperature. The mixture was filtered through a short pad of silica gel 60 (40–63  $\mu\text{m}$ ) which was additionally washed with dichloromethane (2  $\times$  30 ml). The combined filtrate was evaporated in vacuum, and the residue was purified by flash chromatography on silica gel 60 (40–63  $\mu\text{m}$ , eluent: hexane-dichloromethane, 10:1, vol). Yield 5.80 g (40%) of the product as a white foam-like solid.

HRMS:  $[\text{M}]^{+}$  calc for  $\text{C}_{56}\text{H}_{76}\text{Si}$ : 776.5716; found: 776.5731.  $^1\text{H}$  NMR (400 MHz,  $\text{CDCl}_3$ ):  $\delta$  7.53–7.44 (m, 12H), 7.25 (s, 2H), 7.21 (s, 2H), 7.19 (s, 2H), 7.01 (s, 2H), 6.90 (s, 2H), 6.86 (s, 2H), 3.69 (s, 2H), 3.62 (s, 6H), 2.78–2.66 (m, 4H), 2.53 (s, 6H), 2.50 (s, 6H), 2.48–2.35 (m, 4H),

1.472 (s, 36H), 1.466 (s, 36H), 0.92–0.70 (m, 10H).  $^{13}\text{C}\{^1\text{H}\}$  NMR (101 MHz,  $\text{CDCl}_3$ ):  $\delta$  153.7, 153.5, 150.87, 150.83, 150.47, 150.45, 146.3, 140.51, 140.48, 140.32, 140.27, 134.8, 132.4, 126.4, 126.3, 123.6, 123.5, 123.31, 123.28, 120.5, 44.2, 44.1, 34.4, 31.6, 25.0, 24.8, 21.7, 21.6, 13.57, 13.55, 7.42, 7.35, 4.1, 3.8.

***rac*-[1,1'-(diethylsilanediyl)bis( $\eta^5$ -4-(3,5-di-*tert*-butylphenyl)-2-ethyl-6-methyl-1*H*-inden-1-yl)]zirconium dichloride (M40)**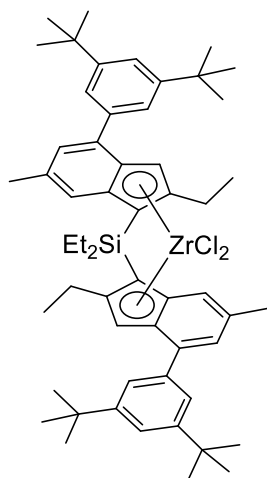

To a solution of bis(4-(3,5-di-*tert*-butylphenyl)-2-ethyl-6-methyl-1*H*-inden-1-yl)diethylsilane (5.70 g, 7.33 mmol) in ether (250 ml) cooled to  $-40^{\circ}\text{C}$  *n*BuLi (5.87 ml of 2.5 M in hexanes, 14.7 mmol) was added in one portion. The mixture was stirred overnight at room temperature, then cooled to  $-80^{\circ}\text{C}$ , and  $\text{ZrCl}_4(\text{THF})_2$  (2.77 g, 7.33 mmol) was added. The mixture was stirred for 24 h and then the solvents were removed in vacuum. The residue was taken up in toluene (100 ml), and the formed hot suspension was filtered through a glass frit (G4). The filtrate was evaporated in vacuum to dryness. Recrystallization of the solid residue from 70 ml of methylcyclohexane/hexane mixture (2:1 vol.) afforded 0.50 g (7%) of the *rac*-complex as a yellow powder. Anal. calc. for  $\text{C}_{56}\text{H}_{74}\text{Cl}_2\text{SiZr}$ : C, 71.75; H, 7.96.

Found: C, 71.84; H, 8.02.  $^1\text{H}$  NMR (400 MHz,  $\text{CDCl}_3$ ):  $\delta$  7.51 (d,  $J=1.8$  Hz, 4H), 7.38 (t,  $J=1.8$  Hz, 2H), 7.33 (br.s, 2H), 7.23 (br.s, 2H), 6.96 (s, 2H), 2.78–2.67 (m, 2H), 2.54–2.42 (m, 2H), 2.38 (s, 6H), 1.96–1.86 (m, 2H), 1.96–1.86 (m, 2H), 1.85–1.75 (m, 2H), 1.47 (t,  $J=7.8$  Hz, 6H), 1.31 (s, 36H), 1.05 (t,  $J=7.5$  Hz, 6H).  $^{13}\text{C}\{^1\text{H}\}$  NMR (101MHz,  $\text{CDCl}_3$ ):  $\delta$  150.9, 142.4, 139.5, 138.6, 135.9, 130.7, 128.73, 128.68, 123.4, 122.6, 121.3, 120.7, 80.4, 35.1, 31.5, 25.8, 22.2, 16.7, 6.7, 6.0.

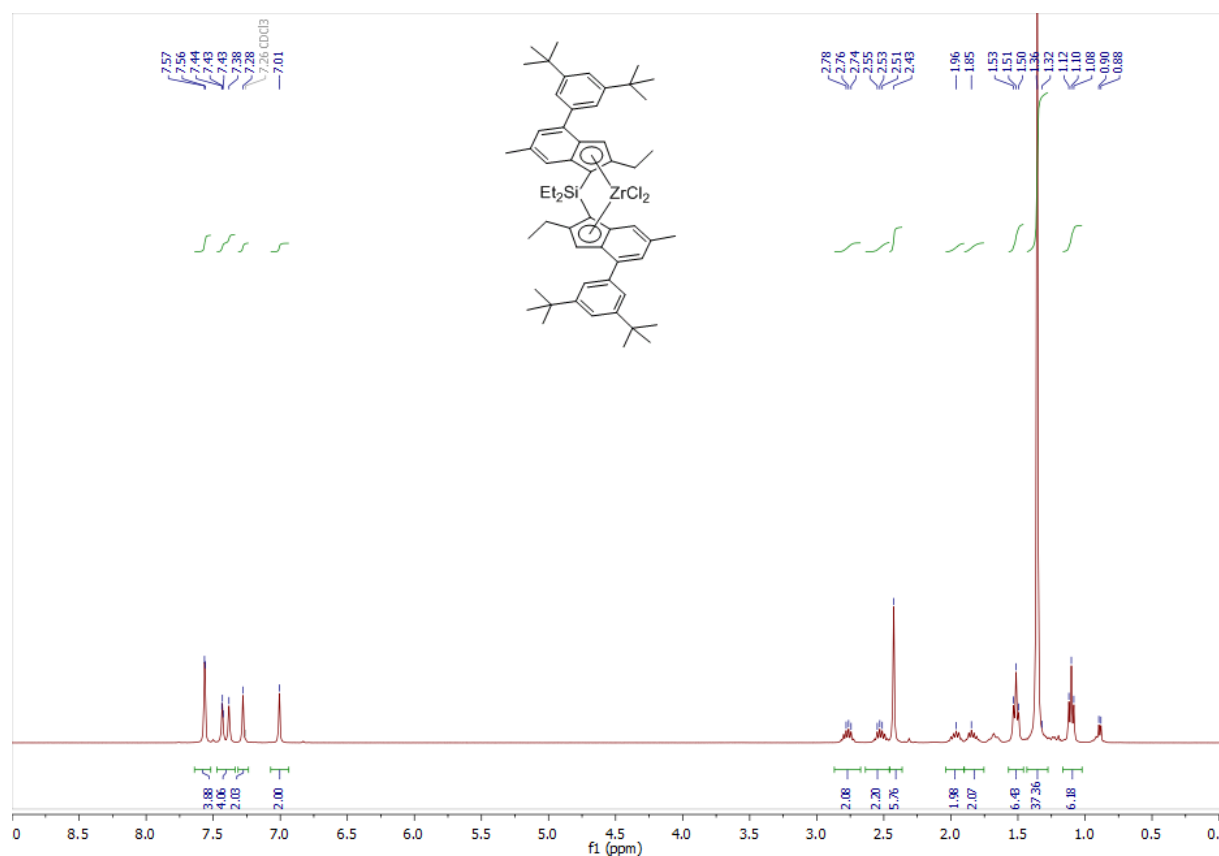

**Figure S31.** <sup>1</sup>H NMR spectrum of **M40** in CDCl<sub>3</sub>. Traces of hexane are visible at 0.88–0.90 ppm.

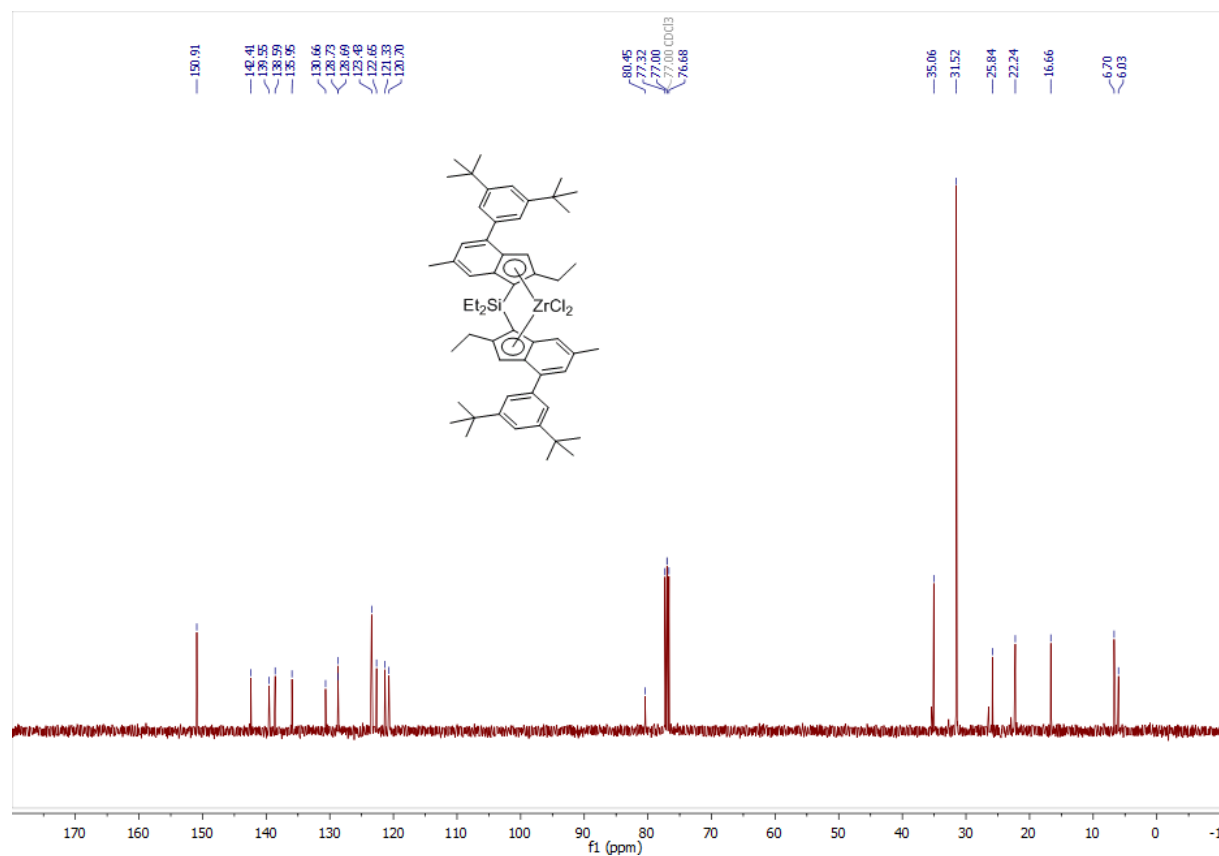

**Figure S32.** <sup>13</sup>C{<sup>1</sup>H} NMR spectrum of **M40** in CDCl<sub>3</sub>.

## M41

### 7-Bromo-6-methoxy-2-methyl-2,3-dihydro-1H-inden-1-one

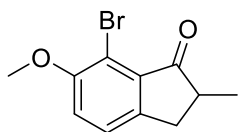

To a solution of 33.6 g (191 mmol) of 6-methoxy-2-methyl-2,3-dihydro-1H-inden-1-one in 1000 ml of DMF a solution of 33.9 g (191 mmol) of *N*-bromosuccinimide in 200 ml of DMF was added dropwise for 12 h, and the obtained mixture was stirred overnight. Then the resulting solution was poured into 2 L of water and extracted with dichloromethane (3 x 200 ml). The combined organic extracts were washed with saturated aqueous solution of Na<sub>2</sub>SO<sub>3</sub>, dried over Na<sub>2</sub>SO<sub>4</sub> and evaporated. The residue was washed on a glass frit (G3) with hexane (3 x 40 ml) and dried in vacuo. Yield: 20.9 g (43%) of the product as a white powder. <sup>1</sup>H NMR (400 MHz, CDCl<sub>3</sub>): δ 7.33 (d, *J* = 8.3 Hz, 1H), 7.14 (d, *J* = 8.3 Hz, 1H), 3.92 (s, 3H), 3.27 (dd, *J* = 16.6 Hz, *J* = 8.0 Hz, 1H), 2.79–2.68 (m, 1H), 2.59 (dd, *J* = 16.6 Hz, *J* = 4.3 Hz, 1H), 1.30 (d, *J* = 7.3 Hz, 3H). <sup>13</sup>C{<sup>1</sup>H} NMR (101 MHz, CDCl<sub>3</sub>): δ 206.7, 155.6, 147.4, 134.6, 125.7, 118.2, 108.4, 57.0, 43.5, 33.1, 16.3.

### 6-Methoxy-2-methyl-7-phenyl-2,3-dihydro-1H-inden-1-one

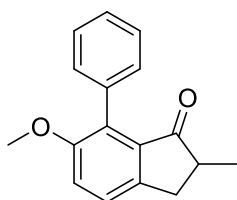

To a solution of 10.0 g (39.2 mmol) of 7-bromo-6-methoxy-2-methyl-2,3-dihydro-1H-inden-1-one in 100 ml of 1,4-dioxane 7.17 g (58.8 mmol) of phenylboronic acid, 38.3 g (118 mmol) of cesium carbonate and 50 ml of water were subsequently added. The obtained mixture was purged with argon for 10 min followed by addition of 2.26 g (1.97 mmol) of Pd(PPh<sub>3</sub>)<sub>4</sub>. This mixture was stirred for 12 h at 90 °C, then cooled to room temperature and diluted with 200 ml of water. The resulting mixture was extracted with dichloromethane (3 x 100 ml). The combined organic extracts were dried over Na<sub>2</sub>SO<sub>4</sub> and then evaporated to dryness. The residue was purified by flash chromatography on silica gel 60 (40–63 μm, eluent: hexane-ethyl acetate = 10:1, vol). Yield: 8.74 g (88%) of the product as a white solid. <sup>1</sup>H NMR (400 MHz, CDCl<sub>3</sub>): δ 7.50–7.38 (m, 4H), 7.38–7.32 (m, 2H), 7.27 (d, *J* = 8.4 Hz, 1H), 3.79 (s, 3H), 3.43–3.31 (m, 1H), 2.77–2.65 (m, 2H), 1.28 (d, *J* = 7.2 Hz, 3H). <sup>13</sup>C{<sup>1</sup>H} NMR (101 MHz, CDCl<sub>3</sub>): δ 208.0, 156.0, 145.6, 134.1, 133.6, 129.8, 128.9, 127.4, 127.3, 126.0, 117.9, 56.5, 43.2, 33.5, 16.0.

### 5-Methoxy-2-methyl-4-phenyl-1H-indene

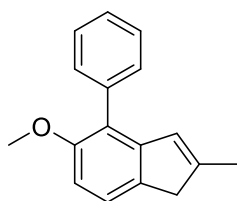

To a solution of 8.74 g (34.6 mmol) of 6-methoxy-2-methyl-7-phenyl-2,3-dihydro-1H-inden-1-one in 50 ml of THF cooled to 5 °C 1.96 g (52.0 mmol) of NaBH<sub>4</sub> was added portion wise. Further on, 25 ml of methanol was added dropwise to this mixture at 5 °C for 1 h. Then, the solvents were removed in vacuum, and to the residue dichloromethane (200 ml) and water (100 ml) were added. The mixture was acidified to pH 5 with 4M HCl. The organic layer was separated, the aqueous layer was additionally extracted with dichloromethane (2 x 50 ml). The combined organic phase was dried over Na<sub>2</sub>SO<sub>4</sub> and evaporated. The residue was dissolved in 100 ml of toluene and to the resulting solution TosOH (0.04 g) was added. The mixture was refluxed with Dean-Stark head for 10 min, and then cooled to room temperature using external ice-water bath. The resulting solution was passed through a short layer of silica gel 60 (40–63 μm), the silica gel layer was additionally washed with 100 ml of dichloromethane. The combined organic filtrate was evaporated and the residue was additionally purified by flash chromatography on silica gel 60 (40–63 μm; eluent: hexane-ethyl acetate = 5:1). Yield: 7.79 g (95%) of a white crystalline solid. <sup>1</sup>H NMR (400 MHz, CDCl<sub>3</sub>): δ 7.53 - 7.44 (m,

4H), 7.44 - 7.36 (m, 1 H), 7.33 (d,  $J = 8.1$  Hz, 1 H), 6.79 (d,  $J = 8.1$  Hz, 1 H), 6.41 (br.s., 1 H), 3.81 (s, 3 H), 3.37 (s, 2 H), 2.15 (s, 3 H).  $^{13}\text{C}\{^1\text{H}\}$  NMR (101 MHz,  $\text{CDCl}_3$ ):  $\delta$  155.4, 147.6, 146.1, 136.8, 135.6, 130.4, 127.8, 126.6, 126.4, 123.0, 122.5, 106.5, 56.0, 42.3, 16.9.

#### Bis(5-methoxy-2-methyl-4-phenyl-1*H*-inden-1-yl)dimethylsilane

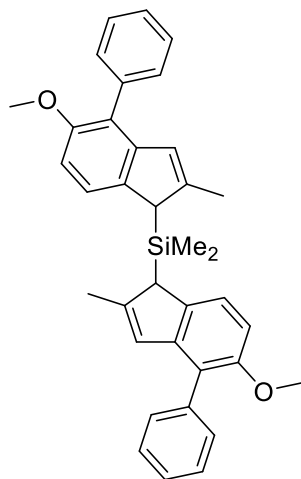

To a solution of 7.45 g (31.5 mmol) of 5-methoxy-2-methyl-4-phenyl-1*H*-indene in 200 ml of diethyl ether 12.6 ml (31.5 mmol) of 2.5 M  $n\text{BuLi}$  in hexanes was added in one portion at  $-40^\circ\text{C}$ . This mixture was stirred overnight at room temperature, then the resulting solution was cooled to  $-78^\circ\text{C}$ , and 50 mg of *N*-methylimidazole was added. The resulting mixture was stirred for 5 min at  $-78^\circ\text{C}$ , then 2.03 g (15.6 mmol) of dichlorodimethylsilane was added in one portion. Further on, this mixture was stirred overnight at ambient temperature. The resulting mixture was filtered through a short pad of silica gel 60 (40–63  $\mu\text{m}$ ) which was additionally washed by 2 x 30 ml of dichloromethane. The combined filtrate was evaporated, and the residue was purified by flash chromatography on silica gel 60 (40–63  $\mu\text{m}$ , eluent: hexane-dichloromethane = 1:1, vol.). Yield: 5.69 g (68%) of the product as a yellowish glassy solid.  $^1\text{H}$  NMR (400 MHz,  $\text{CDCl}_3$ ):  $\delta$  7.50–7.42 (m, 18H), 7.40–

7.34 (m, 4H), 7.32 (d,  $J = 8.3$  Hz, 1H), 6.80 (d,  $J = 8.2$  Hz, 2H), 6.79 (d,  $J = 8.3$  Hz, 2H), 6.52 (br.s, 4H), 3.80 (s, 6H), 3.79 (s, 6H), 3.73 (br.s, 4H), 2.22 (s, 6H), 2.15 (s, 6H),  $-0.18$  (s, 3H),  $-0.19$  (s, 6H),  $-0.19$  (s, 3H).  $^{13}\text{C}\{^1\text{H}\}$  NMR (101 MHz,  $\text{CDCl}_3$ ):  $\delta$  154.5, 154.5, 148.8, 148.6, 145.6, 145.5, 137.4, 137.3, 137.0, 130.5, 127.8, 126.6, 126.2, 126.1, 122.8, 122.7, 122.4, 122.4, 106.4, 106.3, 56.1, 56.0, 46.7, 46.6, 18.0, 18.0,  $-5.9$ ,  $-6.0$ .

#### *rac*-Dimethylsilanediyl-bis( $\eta^5$ -5-methoxy-2-methyl-4-phenyl-inden-1-yl)zirconium dichloride (M41)

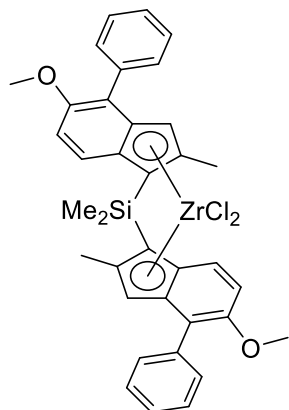

To a cooled to  $-40^\circ\text{C}$  solution of 3.97 g (7.51 mmol) of bis(5-methoxy-2-methyl-4-phenyl-1*H*-inden-1-yl)dimethylsilane in 250 ml of diethyl ether 6.0 ml (15.0 mmol) of 2.5 M  $n\text{BuLi}$  in hexanes was added in one portion. This mixture was stirred overnight at room temperature. The resulting solution was cooled to  $-78^\circ\text{C}$  and 2.83 g (7.51 mmol) of  $\text{ZrCl}_4(\text{THF})_2$  was added. The reaction mixture was stirred for 24 h and then evaporated. The residue was taken up in 100 ml of hot toluene, and the formed mixture was filtered through a short pad of Celite 503. The filtrate was evaporated to dryness, giving a ca. 1:1 mixture of *rac*- and *meso*-complexes. This crude product was recrystallized from toluene yielding 0.22 g (4%) of *rac*-complex as orange crystalline solid. Anal. calc. for

$\text{C}_{36}\text{H}_{34}\text{Cl}_2\text{O}_2\text{SiZr}$ : C, 62.77; H, 4.98. Found: C, 63.16; H, 5.05.  $^1\text{H}$  NMR (400 MHz,  $\text{CDCl}_3$ ):  $\delta$  7.62 (d,  $J = 9.4$  Hz, 2H), 7.58 (m, 4H), 7.46–7.42 (m, 4H), 7.36–7.30 (m, 2H), 6.99 (d,  $J = 9.4$  Hz, 2H), 6.62 (s, 2H), 3.77 (s, 6H), 2.21 (s, 6H), 1.30 (s, 6H).  $^{13}\text{C}\{^1\text{H}\}$  NMR (101 MHz,  $\text{CDCl}_3$ ):  $\delta$  156.6, 136.2, 135.6, 135.5, 129.9, 128.1, 127.2, 125.8, 123.4, 122.1, 120.7, 117.2, 81.9, 58.7, 18.5, 2.5.



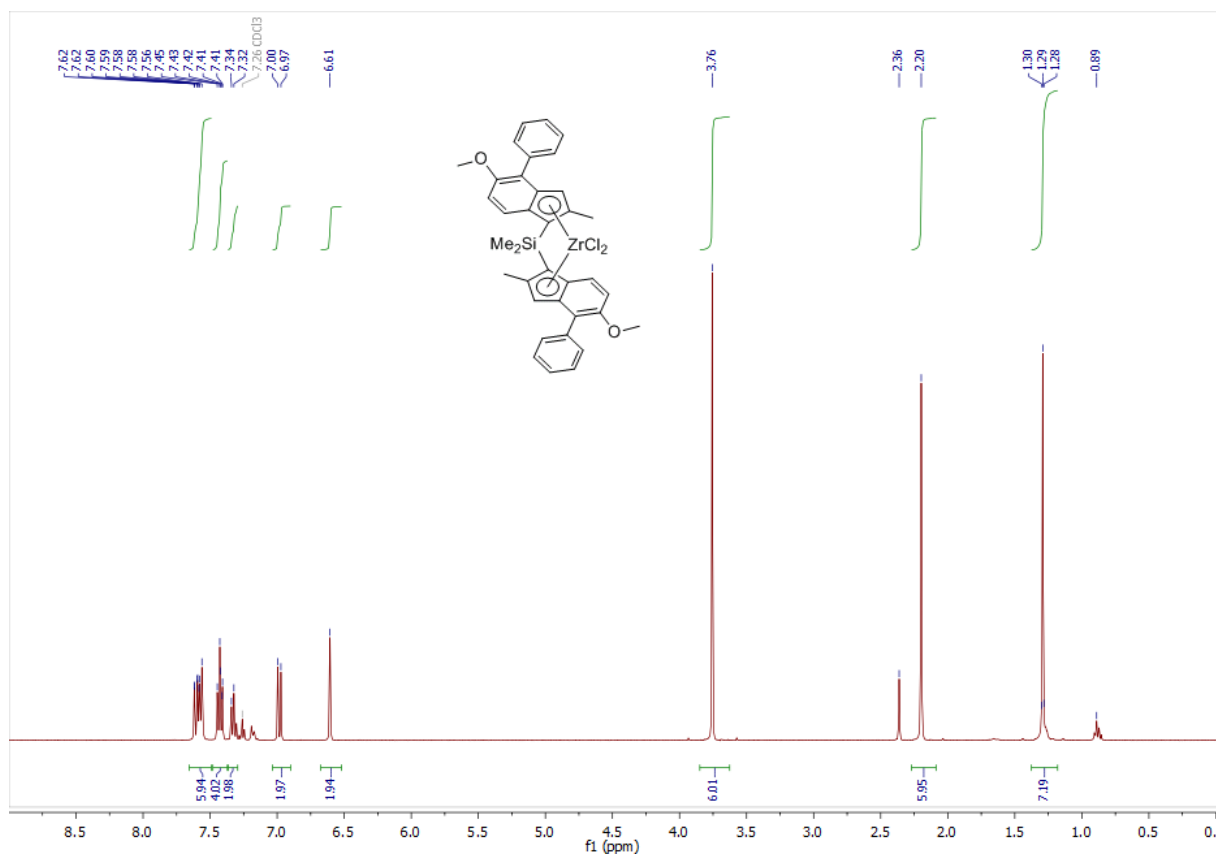

**Figure S33.**  $^1\text{H}$  NMR spectrum of **M41** in  $\text{CDCl}_3$ . Traces of toluene and hexane are visible at 2.36 and 0.89 ppm, respectively.

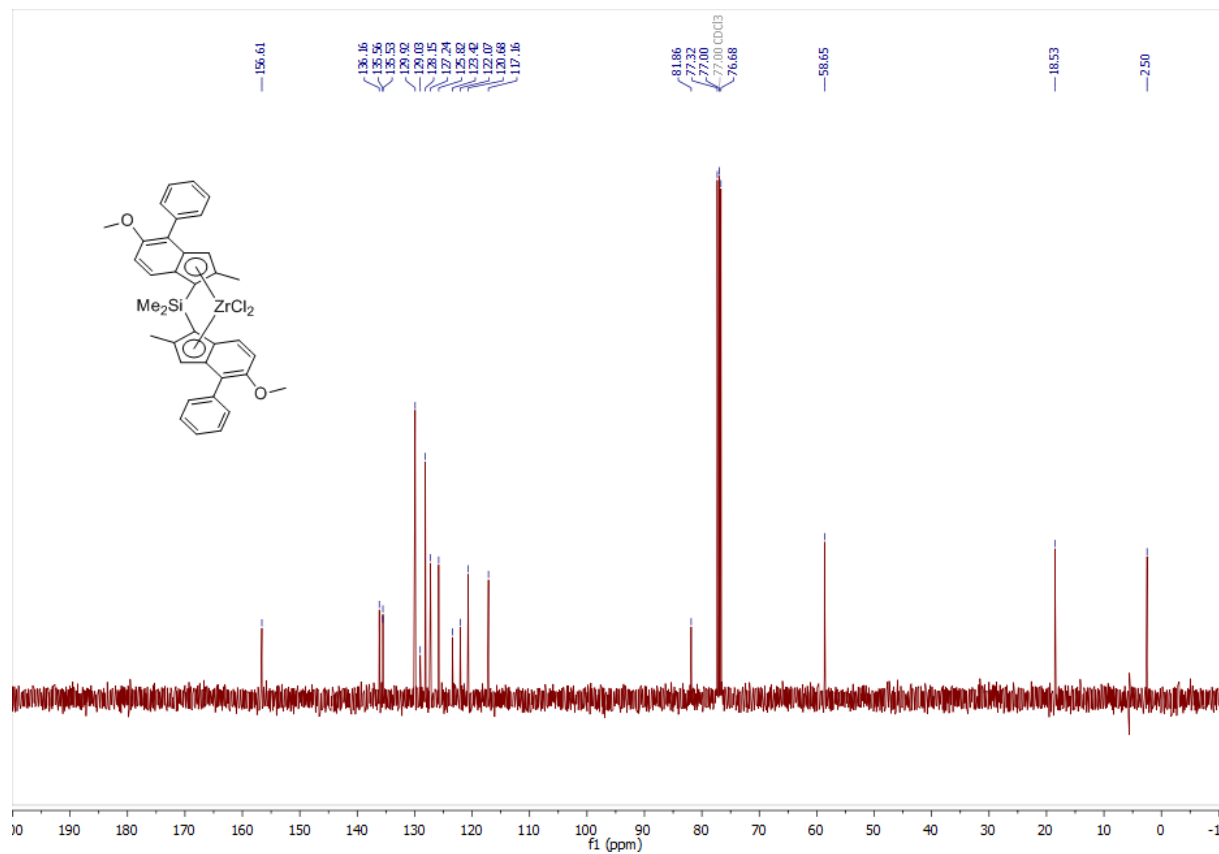

**Figure S34.**  $^{13}\text{C}\{^1\text{H}\}$  NMR spectrum of **M41** in  $\text{CDCl}_3$ .

**Bis(4-(3,5-bis(trimethylsilyl)phenyl)-2-methyl-1*H*-inden-1-yl)dimethylsilane**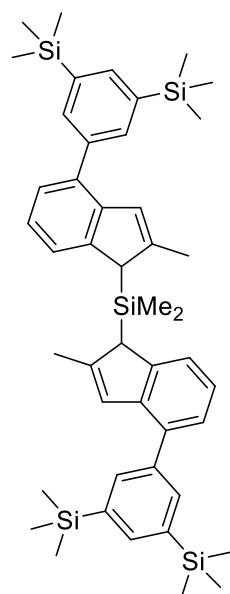

To a solution of (3,5-bis(trimethylsilyl)phenyl)lithium in 500 ml of THF, prepared from 9.80 g (32.5 mmol) of (5-bromo-1,3-phenylene)bis(trimethylsilane) and 36.1 ml (65.0 mmol) of 1.8 M *t*BuLi in pentane at  $-78^{\circ}\text{C}$ , 4.78 g (35.1 mmol) of  $\text{ZnCl}_2$  was added in one portion. The obtained mixture was allowed to warm to room temperature and then stirred overnight. To the resulting organozinc compound 6.17 g (13.0 mmol) of bis(4-bromo-2-methyl-1*H*-inden-1-yl)dimethylsilane, 0.48 g (0.52 mmol) of  $\text{Pd}_2(\text{dba})_3$  and 0.42 g (20.8 mmol) of  $\text{P}^t\text{Bu}_3$  was subsequently added. The reaction mixture was stirred overnight at  $60^{\circ}\text{C}$ , then cooled to room temperature, poured into 1000 ml of water and extracted with 3 x 200 ml of diethyl ether. The combined extracts were passed through a short pad of silica gel 60 (40–63  $\mu\text{m}$ ) and then evaporated. The product was isolated by flash-chromatography on silica gel 60 (40–63  $\mu\text{m}$ ; eluent: hexanes-dichloromethane = 20:1, vol.). Yield: 4.79 g (47%) of an yellowish glassy solid.  $^1\text{H}$  NMR (400 MHz,  $\text{CDCl}_3$ ):  $\delta$  7.83–7.76 (m, 12H), 7.62 (d,  $J = 7.6$  Hz, 2H), 7.49 (d,  $J = 7.5$  Hz, 2H), 7.40 (m, 4H), 7.33–7.25 (m, 4H), 6.92 (s, 2H), 6.90 (s, 2H), 3.95 (s, 2H), 3.93 (s, 2H), 2.36 (s, 6H), 2.35 (s, 6H), 0.43 (2s, sum 72H),  $-0.07$  (s, 3H),  $-0.10$  (s, 3H),  $-0.13$  (s, 6H).  $^{13}\text{C}\{^1\text{H}\}$  NMR (101 MHz,  $\text{CDCl}_3$ ):  $\delta$  147.8, 147.7, 145.5, 145.4, 143.1, 143.1, 139.6, 139.6, 139.4, 136.5, 134.7, 134.7, 134.5, 126.0, 126.0, 125.7, 125.7, 123.2, 123.1, 122.2, 122.1, 47.6, 47.6, 18.2, 18.1,  $-1.0$ ,  $-5.7$ ,  $-5.8$ ,  $-6.2$ .

***rac*-Dimethylsilanediyl-bis[ $\eta^5$ -4-(3,5-bis(trimethylsilyl)phenyl)-2-methylinden-1-yl]zirconium dichloride (M42)**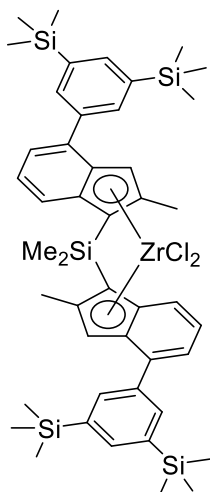

To a cooled to  $-40^{\circ}\text{C}$  solution of 4.61 g (6.09 mmol) of bis(4-(3,5-bis(trimethylsilyl)phenyl)-2-methyl-1*H*-inden-1-yl)dimethylsilane in 250 ml of ether 4.87 ml (12.2 mmol) of 2.5 M *n*BuLi in hexanes was added in one portion. This mixture was stirred overnight at room temperature. The resulting solution was cooled to  $-78^{\circ}\text{C}$  and 2.30 g (6.09 mmol) of  $\text{ZrCl}_4(\text{THF})_2$  was added. The reaction mixture was stirred for 24 h and then evaporated to dryness. The residue was taken up in 100 ml of hot toluene, and the formed mixture was filtered through a short pad of Celite 503. The filtrate was evaporated to dryness, giving a ca. 1:1 mixture of *rac*- and *meso*-complexes. This crude product was crystallized from methylcyclohexane/hexane mixture (1:1, vol.) at  $-30^{\circ}\text{C}$  yielding 0.17 g (3%) of *rac*-complex as a yellow powder. Anal. calc. for  $\text{C}_{46}\text{H}_{62}\text{Cl}_2\text{Si}_5\text{Zr}$ : C, 60.22; H, 6.81. Found: C, 60.54; H, 6.91.  $^1\text{H}$  NMR (400 MHz,  $\text{CDCl}_3$ ):  $\delta$  7.84 (s, 4 H), 7.74–7.66 (m, 4 H), 7.46 (d,  $J = 6.9$  Hz, 2 H), 7.17 (m, 2H), 6.97 (s, 2 H), 2.30 (s, 6 H), 1.37 (s, 6 H), 0.29 (s, 36 H).  $^{13}\text{C}\{^1\text{H}\}$  NMR (101 MHz,  $\text{CDCl}_3$ ):  $\delta$  139.9, 139.3, 137.9, 137.6, 135.7, 134.3, 132.5, 127.6, 126.3, 125.9, 124.2, 122.5, 83.7, 18.6, 2.6,  $-1.0$ .

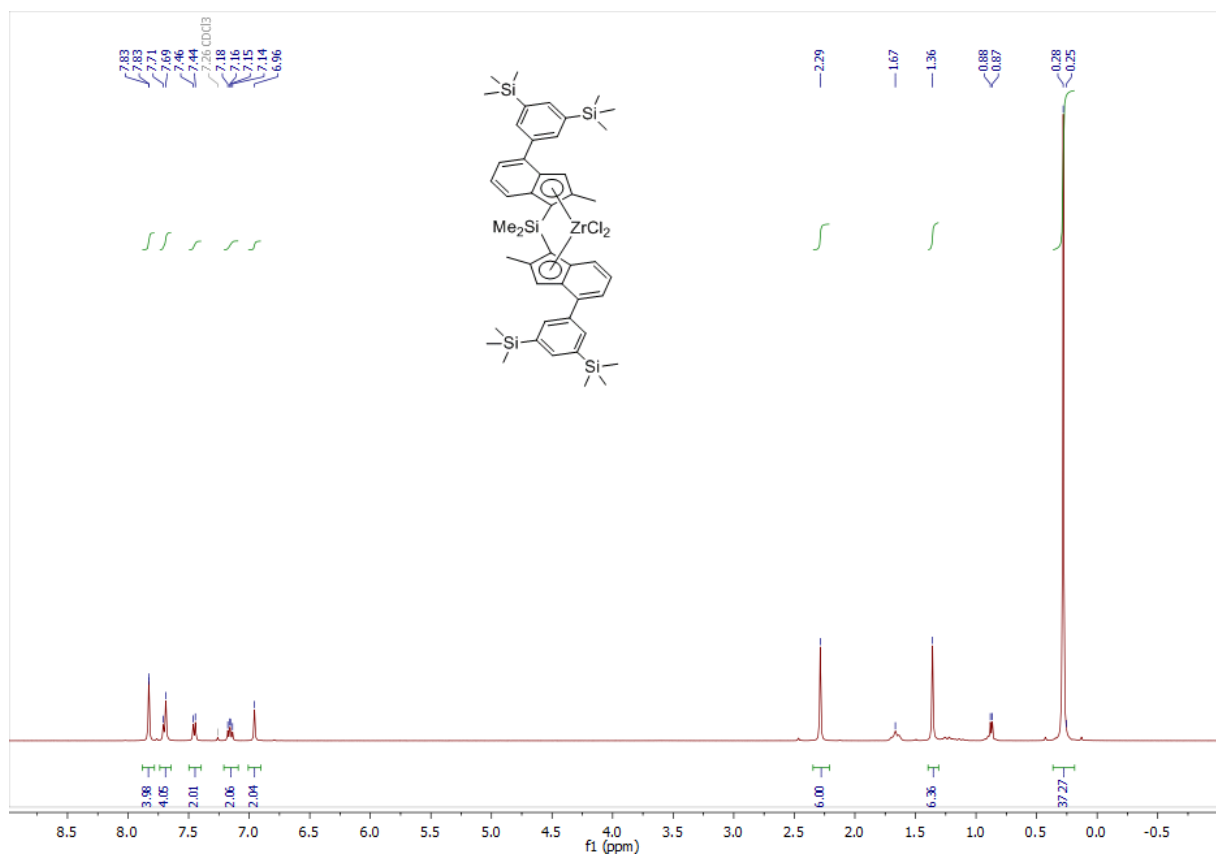

**Figure S35.** <sup>1</sup>H NMR spectrum of **M42** in CDCl<sub>3</sub>. Traces of methylcyclohexane are visible at 0.88 ppm.

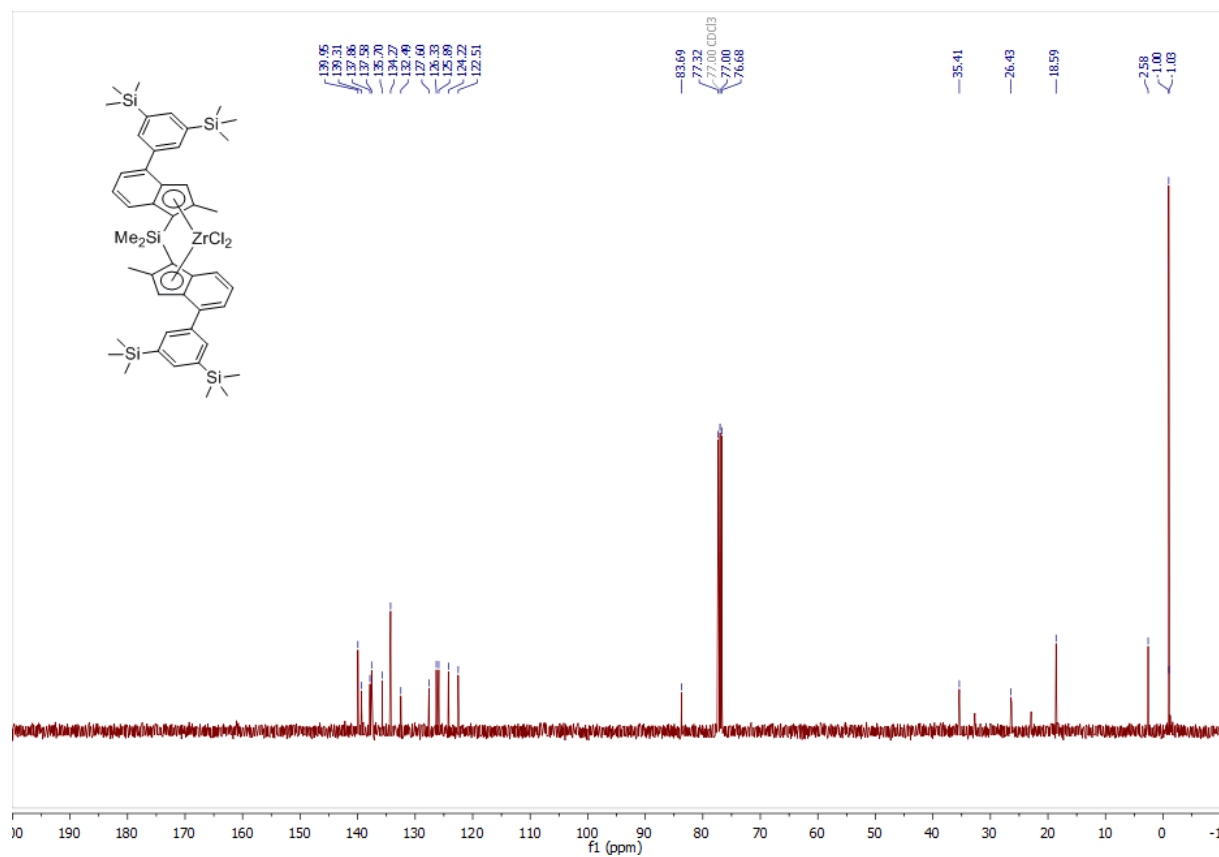

**Figure S36.** <sup>13</sup>C{<sup>1</sup>H} NMR spectrum of **M42** in CDCl<sub>3</sub>.

## M43

**2,6-Di(adamantan-1-yl)-4-bromophenol**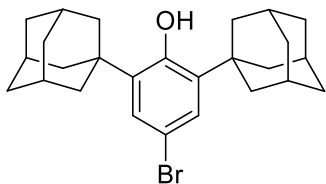

To a mixture of 17.3 g (100 mmol) of 4-bromophenol and 30.4 g (200 mmol) of adamantan-1-ol in 350 ml of dichlorobenzene 19.2 g (200 mmol) of methanesulfonic acid was added dropwise for 30 min at room temperature. Then the obtained solution was stirred for 5 days at 60 °C. The obtained mixture was poured into 1 L of 10% aqueous  $\text{NH}_3$  and then extracted with dichloromethane (3 x 200 ml). The combined organic extracts were washed with 300 ml of water, dried over  $\text{Na}_2\text{SO}_4$ , passed through a short pad of silica gel and evaporated. The remaining dichlorobenzene was removed under vacuum (1 mbar). The residue was dried using a Kugelrohr apparatus, 150 °C/0.5 mbar. The remaining solid was purified by flash chromatography on silica gel 60 (40–63  $\mu\text{m}$ , eluent: hexane). Yield: 32.9 g (75%) of a white powder.  $^1\text{H}$  NMR (600MHz,  $\text{CDCl}_3$ ):  $\delta$  7.21 (s, 2H), 5.34 (s, 1H), 2.13–2.07 (br.s, 18 H), 1.84–1.74 (m, 12H).  $^{13}\text{C}\{^1\text{H}\}$  NMR (151MHz,  $\text{CDCl}_3$ ):  $\delta$  153.6, 138.1, 127.8, 113.3, 41.0, 36.9, 36.9, 28.9.

**1,1'-(5-Bromo-2-methoxy-1,3-phenylene)bis(adamantane)**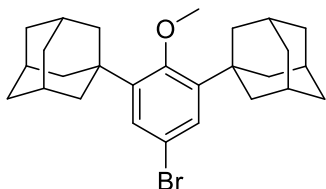

To a suspension of 3.03 g of NaH (60% in mineral oil, 1.82 g, 75.8mmol) in 200 ml of dry THF a solution of 22.3 g (50.5 mmol) of 2,6-di(adamantan-1-yl)-4-bromophenol in 100 ml of dry THF was added dropwise at 0 °C for 2 h. After complete addition, the reaction mixture was allowed to warm to room temperature and stirred for 30 min. Then 7.01 g (55.6 mmol) of  $\text{Me}_2\text{SO}_4$  was added dropwise and the obtained mixture was stirred at 65 °C for 12 h. Further on, the excess of NaH was quenched with 50 ml of water at 0 °C. Then the resulting mixture was diluted with additional 2000 ml of water and extracted with hexane (3 x 100 ml). The combined organic extracts were washed 100 ml of 30% aqueous  $\text{NH}_3$ , water (2 x 100 ml), passed through a short pad of silica gel and evaporated. The residue was purified by flash chromatography on silica gel 60 (40–63  $\mu\text{m}$ , eluent: hexane). Yield: 20.8 g (90%) of yellowish powder.  $^1\text{H}$  NMR (600MHz,  $\text{CDCl}_3$ ):  $\delta$  7.33 (s, 2H), 3.67 (s, 3H), 2.10 (br.s, 18H), 1.78 (br.s., 12H).  $^{13}\text{C}\{^1\text{H}\}$  NMR (151 MHz,  $\text{CDCl}_3$ ):  $\delta$  159.7, 146.0, 129.2, 116.8, 65.9, 42.5, 38.7, 36.8, 29.2.

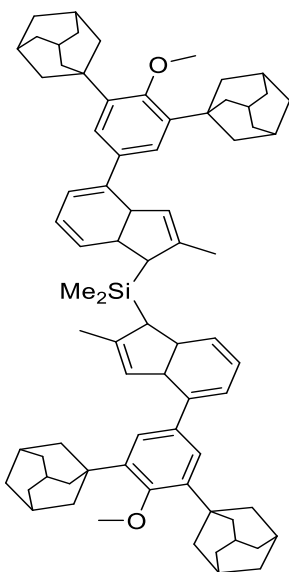**Bis(4-(3,5-di(adamantan-1-yl)-4-methoxyphenyl)-2-methyl-1H-inden-1-yl)dimethylsilane**

To a solution of (3,5-di(adamantan-1-yl)-4-methoxyphenyl)lithium in 500 ml of THF, prepared from 13.0 g (28.6mmol) of 1,1'-(5-bromo-2-methoxy-1,3-phenylene)bis(adamantane) and 31.8 ml (57.2mmol) of 1.8 M  $t\text{BuLi}$  in pentane at –78 °C, 4.43 g (32.5 mmol) of  $\text{ZnCl}_2$  was added in one portion. The resulting mixture was allowed to warm to room temperature and then stirred overnight. To the resulting organozinc compound 6.17 g (13.0 mmol) of bis(4-bromo-2-methyl-1H-inden-1-yl)dimethylsilane, 0.24 g (0.26mmol) of  $\text{Pd}_2(\text{dba})_3$  and 0.21 g (10.4mmol) of  $\text{P}^t\text{Bu}_3$  was subsequently added. The reaction mixture was stirred overnight at 60 °C, then cooled to room temperature, poured into 1000 ml of water and then extracted with 3 x 200 ml of diethyl ether. The combined extracts were passed through a short pad of silica gel 60 (40–63  $\mu\text{m}$ ) and then evaporated. The product was isolated by flash chromatography on silica gel 60 (40–63

$\mu\text{m}$ ; eluent: hexanes-dichloromethane = 5:1, vol.). Yield: 6.00 g (43%) of the product as a yellowish glassy solid.  $^1\text{H}$  NMR (400 MHz,  $\text{CDCl}_3$ ):  $\delta$  7.54 (d,  $J$  = 7.6 Hz, 2H), 7.47 (s, 4H), 7.46 (s, 4H), 7.41 (d,  $J$  = 7.3 Hz, 1H), 7.35–7.31 (m, 4H), 7.25–7.18 (m, 4H), 6.88 (s, 2H), 6.87 (s, 2H), 3.90 (s, 2H), 3.86 (s, 2H), 3.81 (s, 6H), 3.81 (s, 6H), 2.34 (s, 6H), 2.32 (s, 6H), 2.30–2.20 (br.s, 48H), 2.10–2.06 (br.s, 24H), 1.92–1.74 (m, 48H), –0.10 (s, 3H), –0.16 (s, 3H), –0.17 (s, 6H).  $^{13}\text{C}\{^1\text{H}\}$  NMR (101 MHz,  $\text{CDCl}_3$ ):  $\delta$  159.4, 147.4, 147.2, 145.4, 145.4, 143.3, 142.8, 142.8, 135.5, 135.5, 134.9, 134.9, 126.8, 126.8, 126.3, 126.2, 125.6, 125.5, 123.0, 122.9, 121.7, 121.7, 65.7, 47.5, 42.7, 38.6, 37.0, 29.3, 18.2, 18.2, –5.5, –5.7, –6.0.

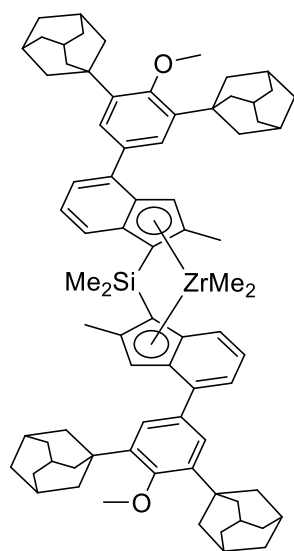

***rac*-Dimethylsilanediyl-bis[ $\eta^5$ -4-(4-methoxy-3,5-diadamantylphenyl)-2-methylinden-1-yl]dimethylzirconium (M43)**

To a solution of bis(4-(3,5-di(adamantan-1-yl)-4-methoxyphenyl)-2-methyl-1H-inden-1-yl)dimethylsilane (2.50 g, 2.35 mmol) in ether (150 ml) cooled to  $-40^\circ\text{C}$   $n\text{BuLi}$  (1.90 ml of 2.5 M in hexanes, 4.69 mmol) was added in one portion. The mixture was stirred overnight at room temperature, then evaporated to near dryness. The resulting foam was cooled to  $-100^\circ\text{C}$  and 100 ml of precooled dichloromethane was added via cannula. To the resulting solution 547 mg (2.35 mmol) of  $\text{ZrCl}_4$  was added in one portion. The resulting suspension was stirred for 12 h and then the solvents were removed in vacuum. The residue was taken up in toluene (100 ml), and the formed suspension was filtered through a glass frit (G4). The filtrate was evaporated in vacuum to dryness. To the residue 50 ml of toluene and  $\text{MeMgBr}$  (2.43 ml, 7.05 mmol, 2.9M in ether) were subsequently added. The

resulting suspension was stirred for 12 h at  $60^\circ\text{C}$  and then the solvents were removed in vacuum. The residue was taken up in hexane (100 ml), and the formed suspension was filtered through a glass frit (G4). The filtrate was evaporated in vacuum to dryness. Recrystallization of the solid residue from 5 ml of hexane at  $-30^\circ\text{C}$  afforded 117mg (4%) of the complex as a light-yellow powder (*rac/meso* = 11/1). Anal. calc. for  $\text{C}_{78}\text{H}_{96}\text{O}_2\text{SiZr}$ : C, 79.06; H, 8.17. Found: C, 79.35; H, 8.34.  $^1\text{H}$  NMR (400 MHz,  $\text{C}_6\text{D}_6$ ):  $\delta$  7.86 (s, 4H), 7.46–7.51 (m, 4H), 7.25 (s, 2H), 6.93–6.97 (m, 2H), 3.51 (s, 6H), 2.28–2.42 (m, 24H), 2.03–2.15 (m, 12H), 1.97 (s, 6H), 1.70–1.86 (m, 24H), 0.79 (s, 6H), –0.41 (s, 6H).  $^{13}\text{C}\{^1\text{H}\}$  NMR (101MHz,  $\text{C}_6\text{D}_6$ ):  $\delta$  160.9, 144.6, 140.1, 136.0, 135.1, 129.8, 129.3, 127.5, 125.0, 124.8, 124.6, 116.6, 79.6, 65.9, 43.6, 39.5, 37.6, 36.6, 30.2, 18.5, 2.9.

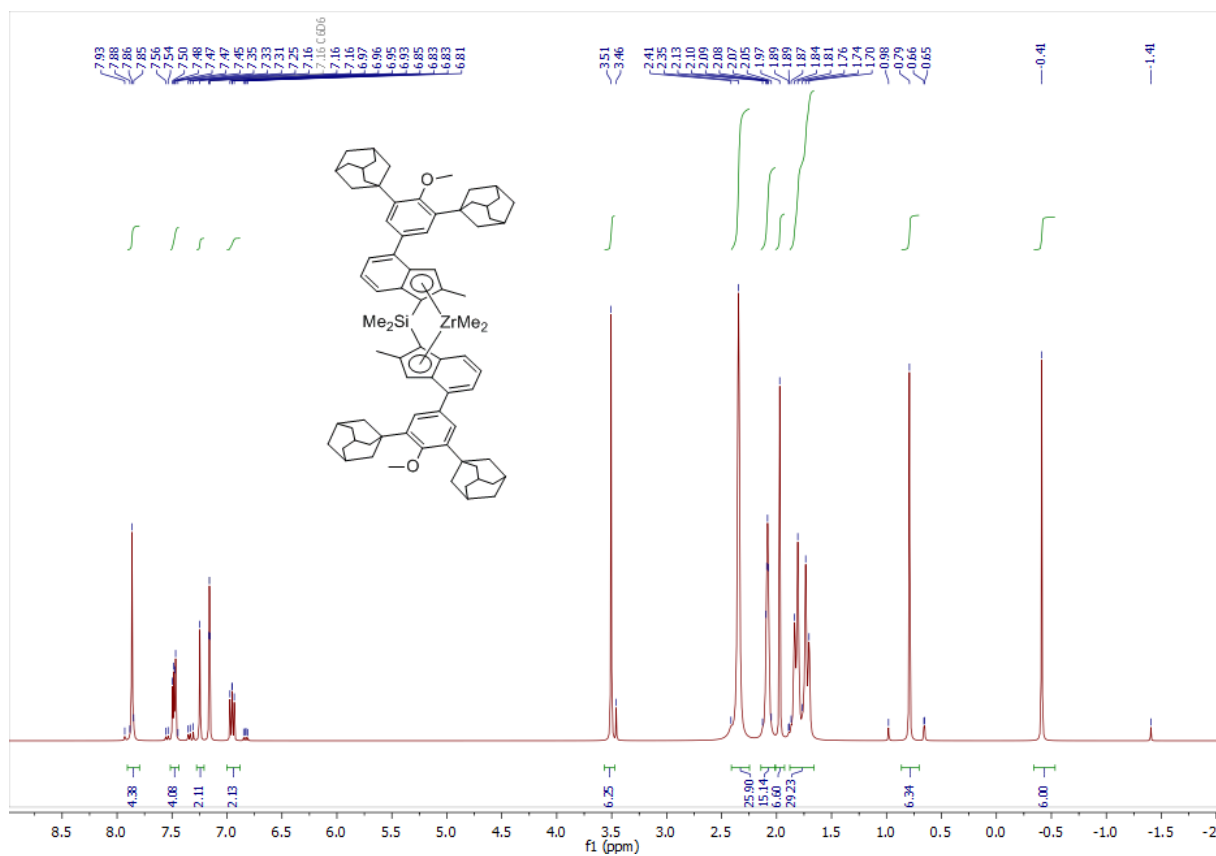

Figure S37. <sup>1</sup>H NMR spectrum of **M43** (*rac/meso* = 11/1) in C<sub>6</sub>D<sub>6</sub>.

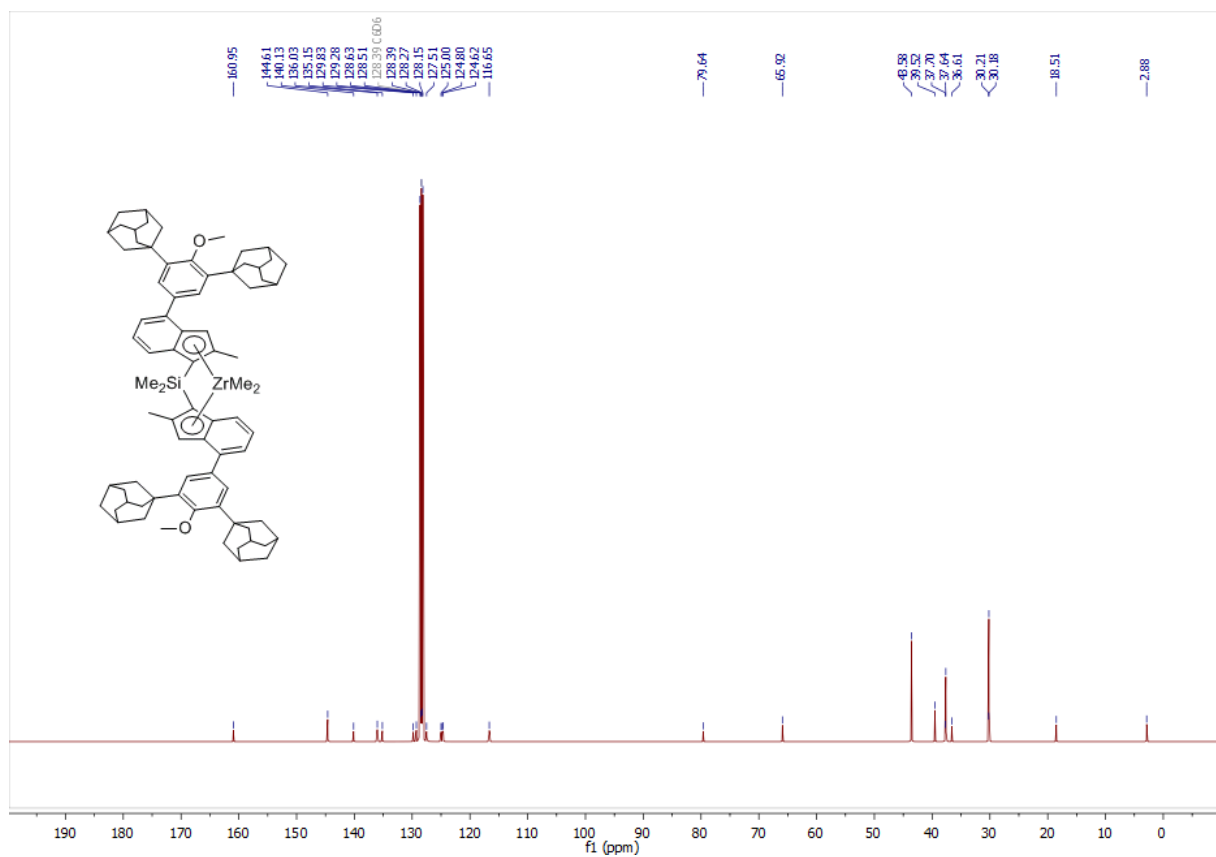

Figure S38. <sup>13</sup>C{<sup>1</sup>H} NMR spectrum of **M43** (*rac/meso* = 11/1) in C<sub>6</sub>D<sub>6</sub>.

## References

- [1] Nikulin, M. V.; Tsarev, A. A.; Lygin, A. V.; Ryabov, A. N.; Beletskaya, I. P.; Voskoboinikov, A. Z., Palladiumcatalyzed arylation of bis(4-bromo-2-methylinden-1-yl)dimethylsilane and related compounds, *Russ. Chem. Bull.* **2008**, *57*, 2298–2306.
- [2] Resconi, L.; Castro, P.; Virkkunen, V.; Izmer, V. V.; Kononovich, D. S.; Kulyabin, P. S.; Voskoboynikov, A. Z. *Int. Pat. Appl. WO 2014096164A1*.
- [3] Resconi, L.; Virkkunen, V.; Noureddine, A.; Castro, P.; Izmer, V.; Kononovich, D.; Voskoboynikov, A. *Int. Pat. Appl. WO 2014096282A1*.
- [4] Resconi, L.; Castro, P.; Virkkunen, V.; Izmer, V. V.; Kononovich, D. S.; Kulyabin, P. S.; Voskoboynikov, A. Z. *Int. Pat. Appl. WO2014096166A1*.
- [5] Voskoboynikov, A. Z.; Asachenko, A. F.; Kononovich, D. S.; Nikulin, M. V.; Tsarev, A. A.; Maaranen, J.; Vanne, T.; Kauhanen, J.; Mansner, E.; Kokko, E.; Saarinen, L. *Int. Pat. Appl. WO2009027075A1*.
- [6] Voskoboynikov, A. Z.; Ryabov, A. N.; Nikulin, M. V.; Lygin, A. V.; Coker, C. L.; Canich, J. A. M. *Int. Pat. Appl. WO 2007070041A1*.
- [7] Izmer, V. V.; Lebedev, A. Y.; Nikulin, M. V.; Ryabov, A. N.; Asachenko, A. F.; Lygin, A. V.; Sorokin, D. A.; Voskoboynikov, A. Z., Palladium-Catalyzed Pathways to Aryl-Substituted Indenes: Efficient Synthesis of Ligands and the Respective ansa-Zirconocenes. *Organometallics* **2006**, *25*, 1217–1229.
- [8] Schöbel, A.; Herdtweck, E.; Parkinson, M.; Rieger, B., Ultra-Rigid Metallocenes for Highly Iso- and Regiospecific Polymerization of Propene: The Search for the Perfect Polypropylene Helix. *Chem. Eur. J.* **2012**, *18*, 4174–4178.
- [9] Resconi, L.; Focante, F.; Balboni, D.; Nifant'ev, I. E.; Ivchenko, P. V.; Bagrov V.; *Int. Pat. Appl. WO2007116034A1*.
- [10] Fujita, T.; Fukuoka, O.; Imuda, J.; Kawai, K.; Kiso, Y.; Nitahara, M.; Saito, J.; Tashiro, K.; Ueda, T.; Yoshida, M. *Japan. Pat. Appl. JPH07286005A*, 1995.
- [11] Canich, J. A. M.; Jiang, P.; Casty, G. L.; Kiss, G.; Voskoboynikov, A. Z. U. S. Pat. US 7812104B2, 2010.
- [12] Matsubara, K.; Ueno, K.; Shibata, Y.; Synthesis and Structures of Nickel Halide Complexes Bearing Mono- and Bis-coordinated *N*-Heterocyclic Carbene Ligands, Catalyzing Grignard Cross-Coupling Reactions, *Organometallics*, **2000**, *25*, 3422–3427.
- [13] Zhang, X.; Zhu, Q.; Guzei, I. A.; Jordan, R. F.; General Synthesis of Racemic Me<sub>2</sub>Si-Bridged Bis(indenyl) Zirconocene Complexes, *J. Am. Chem. Soc.* **2000**, *122*, 8093–8094.
- [14] Sevov, C.S.; Hartwig, J.F., Iridium-Catalyzed Oxidative Olefination of Furans with Unactivated Alkenes, *J. Am. Chem. Soc.* **2014**, *136*, 10625–10631.
- [15] Sam, J.; Plamp, J.N., Hypotensive Basic Ethers in the Indan Series, *J. Am. Chem. Soc.* **1960**, *82*, 5205–5209.

## 2. Polymerization Details

Prior to the execution of a polymerization library, the PPR modules undergo 'bake-and-purge' cycles overnight (8 h at 90-140 °C with intermittent dry N<sub>2</sub> flow), to remove any contaminants and left-overs from previous experiments. After cooling to glove-box temperature, the module stir tops are taken off, and the 48 cells are fitted with disposable 10 mL glass inserts (pre-weighed in a Mettler-Toledo Bohdan Balance Automator) and polyether ether ketone (PEEK) stir paddles. The stir tops are then set back in place, and the cells are loaded with the appropriate amounts of toluene solvent and triisobutylaluminum (TIBA, 10 μmol) scavenger, thermostated at 60 °C, and brought to 95 psi of pressure with propene. At this point, the catalyst injection sequence is started; aliquots of (a) a toluene 'chaser', (b) a toluene solution of catalyst (variable amount, see Table S1), (c) a toluene solution of the proper activator (HNMe<sub>2</sub>Ph<sup>+</sup>[B(C<sub>6</sub>F<sub>5</sub>)<sub>4</sub>]<sup>-</sup> or [Ph<sub>3</sub>C<sup>+</sup>] [B(C<sub>6</sub>F<sub>5</sub>)<sub>4</sub>]<sup>-</sup>, the first one was used in 2-fold excess with respect to catalyst, the second one was used in 5-10-fold excess), (d) a toluene 'buffer', all separated by nitrogen gaps, are uploaded into the slurry needle and subsequently injected into the cell of destination, thus starting the reaction. This is left to proceed under stirring (800 rpm) at constant temperature and pressure with continuous feed of propene on demand until the desired monomer consumption has been reached (for reaction time, see Table S1), and quenched by over-pressurizing the cell with 50 psi (3.4 bar) of dry air (preferred over other possible catalyst quenchers because in case of cell or quench line leakage oxygen is promptly detected by the dedicated glove-box sensor). Once all cells have been quenched, the modules are cooled down and vented, the stir-tops are removed, and the glass inserts containing the reaction phases are taken out and transferred to a centrifugal evaporator (Genevac EZ-2 Plus or Martin Christ RVC 2-33 CDplus), where all volatiles are distilled out and the polymers are thoroughly dried overnight.

Reaction yields are double-checked against on-line monomer conversion measurements by robotically weighing the dry polymers while still in the reaction vials, subtracting the pre-recorded tare. Polymer aliquots are then sent to the characterizations.

GPC curves were recorded with a Freeslate Rapid GPC setup, equipped with a set of two mixed-bed Agilent

PLgel 10 μm columns and a Polymer Char IR4 detector. Calibration was performed with the universal method, using 10 monodisperse polystyrene samples (*M<sub>n</sub>* between 1.3 and 3700 kDa).

<sup>13</sup>C NMR spectra were recorded with a 100 MHz Bruker Avance III 400 spectrometer equipped with a 5 mm high-temperature cryoprobe. Polymer samples (~25 mg) were dissolved at 120 °C in



tetrachloroethane-1,2- $d_2$  (0.5 mL) with 0.40 mg mL<sup>-1</sup> BHT (2,6-di-*tert*-butyl-4-methylphenol) as stabilizer. DSC curves were obtained with a differential scanning calorimeter (DSC-822 by Mettler Toledo) in a flowing N<sub>2</sub> atmosphere at a scanning rate of 10 °C/min from 0 to 200 °C. Polymer melting points ( $T_m$ ) were collected from the second heating run.

**Table S1. Propene Polymerization Experiments.**

Activity ( $R_{pAV}$ ) given in kg mmol<sup>-1</sup> h<sup>-1</sup>. For experimental data for **M1-M19**: *Macromolecules* **2018**, *51*, 8073-8083. Updated data provided for **M3** in the table. Except for dimethyl precursors (**M20**, **M31** and **M43**) activity values for AB are given for completeness and are not indicative of activity trends; the reaction rate was intentionally slowed down, see main paper for more details.

| Catalyst   | Activator | $n_{cat}$<br>(nmol) | $t$<br>(s) | Yield<br>(mg) | $R_{pAV}$ |
|------------|-----------|---------------------|------------|---------------|-----------|
| <b>M20</b> | AB        | 3.75                | 1200       | 28            | 60        |
|            |           | 5                   | 496        | 67            |           |
| <b>M21</b> | AB        | 20                  | 2456       | 59            | 5         |
|            |           | 30                  | 1397       | 57            |           |
| <b>M22</b> | AB        | 25                  | 1462       | 156           | 14        |
|            |           | 25                  | 1742       | 142           |           |
| <b>M23</b> | AB        | 15                  | 894        | 34            | 15        |
|            |           | 15                  | 716        | 66            |           |
| <b>M24</b> | AB        | 20                  | 2578       | 143           | 8         |
|            |           | 20                  | 3143       | 91            |           |
| <b>M25</b> | AB        | 20                  | 3601       | 125           | 9         |
|            |           | 20                  | 2867       | 186           |           |
| <b>M26</b> | AB        | 20                  | 1089       | 107           | 11        |
|            |           | 20                  | 2302       | 62            |           |
| <b>M27</b> | AB        | 20                  | 4583       | 63            | 2         |
|            |           | 30                  | 6491       | 66            |           |
| <b>M28</b> | AB        | 30                  | 3602       | 47            | 2         |
|            |           | 20                  | 3601       | 56            |           |
| <b>M29</b> | AB        | 40                  | 3324       | 75            | 3         |
|            |           | 40                  | 3281       | 136           |           |
| <b>M30</b> | AB        | 40                  | 1847       | 264           | 12        |
|            |           | 40                  | 1270       | 145           |           |
|            | TTB       | 2                   | 724        | 118           | 292       |
| <b>M31</b> | AB        | 5                   | 2075       | 21            | 25        |
|            |           | 6                   | 730        | 53            |           |
| <b>M32</b> | AB        | 20                  | 1446       | 74            | 7         |
|            |           | 20                  | 1367       | 37            |           |

Table S1, ctd. Propene Polymerization Experiments.

| Catalyst   | Activator | $n_{\text{cat}}$<br>(nmol) | $t$<br>(s) | Yield<br>(mg) | $R_{\text{pAV}}$ |
|------------|-----------|----------------------------|------------|---------------|------------------|
| <b>M33</b> | AB        | 30                         | 2047       | 62            | 3                |
|            |           | 35                         | 3026       | 40            |                  |
|            | TTB       | 3                          | 500        | 78            | 187              |
| <b>M34</b> | AB        | 20                         | 7014       | 26            | 7                |
|            |           | 25                         | 1174       | 103           |                  |
| <b>M35</b> | AB        | 30                         | 1237       | 63            | 5                |
|            |           | 40                         | 2308       | 83            |                  |
| <b>M36</b> | AB        | 40                         | 3824       | 83            | 2                |
|            |           | 80                         | 1580       | 50            |                  |
| <b>M37</b> | AB        | 20                         | 497        | 119           | 38               |
|            |           | 15                         | 896        | 122           |                  |
| <b>M38</b> | AB        | 25                         | 1844       | 22            | 2                |
|            |           | 40                         | 2229       | 40            |                  |
| <b>M39</b> | AB        | 20                         | 3714       | 61            | 5                |
|            |           | 20                         | 2707       | 114           |                  |
| <b>M40</b> | AB        | 8                          | 1520       | 41            | 1                |
|            |           | 8                          | 1544       | 41            |                  |
| <b>M41</b> | AB        | 30                         | 2186       | 69            | 3                |
|            |           | 30                         | 1832       | 37            |                  |
| <b>M42</b> | AB        | 30                         | 1671       | 77            | 5                |
|            |           | 30                         | 1364       | 55            |                  |
| <b>M43</b> | AB        | 7.5                        | 318        | 107           | 133              |
|            |           | 2.5                        | 974        | 70            |                  |
| <b>M3</b>  | AB        | 40                         | 2009       | 65            | 5                |
|            |           | 40                         | 1428       | 119           |                  |

Table S2. Full Polymer Characterization.

| Catalyst | Activator | NMR                                      |          |               |            |           |           |                 |                    | $T_m^b$ | GPC     |         |      |
|----------|-----------|------------------------------------------|----------|---------------|------------|-----------|-----------|-----------------|--------------------|---------|---------|---------|------|
|          |           | $mmrrmm^a$                               | $\sigma$ | $\sigma_{AV}$ | $[mmmm]^d$ | $[2,1]^a$ | $[3,1]^a$ | $regio_{tot}^a$ | $regio_{tot,AV}^a$ |         | $M_n^c$ | $M_w^c$ | PDI  |
| M20      | AB        | <0.01                                    | >0.9999  | >0.9999       | >99.95     | 0.44      | 0.04      | 0.48            | 0.48               | 158.2   | 573     | 1289    | 2.2  |
|          |           | <0.01                                    | >0.9999  |               | >99.95     | 0.45      | 0.03      | 0.48            |                    |         | 642     | 1386    | 2.2  |
| M21      | TTB       | oligomers; maybe very slightly isotactic |          |               |            |           |           |                 |                    |         | 0.8     | 1       | 1.3  |
|          |           |                                          |          |               |            |           |           |                 |                    |         | 0.8     | 1       | 1.3  |
| M22      | AB        | 0.80                                     | 0.9916   | 0.9917        | 95.87      | 0.89      | n.d.      | 0.89            | 0.90               | 143.2   | 120     | 247     | 2.1  |
|          |           | 0.78                                     | 0.9918   |               | 95.97      | 0.90      | n.d.      | 0.90            |                    |         | 132     | 283     | 2.1  |
| M23      | AB        | 0.08                                     | 0.9992   | 0.9991        | 99.60      | 0.27      | n.d.      | 0.27            | 0.28               | 159.7   | 393     | 854     | 2.2  |
|          |           | 0.11                                     | 0.9989   |               | 99.45      | 0.26      | 0.02      | 0.28            |                    |         | 364     | 841     | 2.3  |
| M24      | AB        | 0.10                                     | 0.9990   | 0.9990        | 99.50      | 0.52      | 0.03      | 0.55            | 0.54               | 156.1   | 539     | 1317    | 2.4  |
|          |           | 0.10                                     | 0.9990   |               | 99.50      | 0.49      | 0.03      | 0.52            |                    |         | 724     | 1582    | 2.2  |
| M25      | AB        | 0.11                                     | 0.9989   | 0.9989        | 99.45      | 0.64      | 0.05      | 0.69            | 0.69               | 153.4   | 692     | 1661    | 2.4  |
|          |           | 0.11                                     | 0.9989   |               | 99.45      | 0.65      | 0.04      | 0.69            |                    |         | 729     | 1760    | 2.4  |
| M26      | AB        | 0.09                                     | 0.9991   | 0.9991        | 99.55      | 0.40      | 0.03      | 0.43            | 0.43               | 158.2   | 402     | 869     | 2.2  |
|          |           | 0.10                                     | 0.9990   |               | 99.50      | 0.40      | 0.03      | 0.43            |                    |         | 552     | 1080    | 2.0  |
| M27      | AB        | 0.22                                     | 0.9978   | 0.9978        | 98.90      | 0.81      | 0.15      | 0.96            | 0.98               | 148.4   | 535     | 1060    | 2.0  |
|          |           | 0.22                                     | 0.9978   |               | 98.90      | 0.84      | 0.16      | 1.00            |                    |         | 444     | 1079    | 2.4  |
| M28      | AB        | too short; sPP CE                        |          |               |            |           |           |                 |                    |         | 3.3     | 6.1     | 1.8  |
|          |           |                                          |          |               |            |           |           |                 |                    |         | 3.3     | 5.9     | 1.8  |
| M29      | AB        | 0.03                                     | 0.9997   | 0.9997        | 99.85      | 0.23      | n.d.      | 0.23            | 0.23               | 162.2   | 374     | 898     | 2.4  |
|          |           | 0.03                                     | 0.9997   |               | 99.85      | 0.23      | n.d.      | 0.23            |                    |         | 417     | 891     | 2.1  |
| M30      | AB        | <0.02                                    | >0.9998  | 0.9997        | >99.90     | 0.66      | 0.05      | 0.71            | 0.71               | 156.0   | 1392    | 3028    | 2.2  |
|          |           | <0.04                                    | >0.9996  |               | >99.90     | 0.67      | 0.03      | 0.70            |                    |         | 1478    | 3436    | 2.3  |
|          | TTB       |                                          |          |               |            |           |           |                 |                    |         |         | 1405    | 3461 |

<sup>a</sup>in mol%, <sup>b</sup>in °C, <sup>c</sup>in kDa, <sup>d</sup>calculated from  $\sigma$ .

Table S2, ctd. Full Polymer Characterization.

| Catalyst | Activator | NMR       |          |               |            |           |           |                 |                    | $T_m^b$ | GPC     |         |     |
|----------|-----------|-----------|----------|---------------|------------|-----------|-----------|-----------------|--------------------|---------|---------|---------|-----|
|          |           | $mrrmm^a$ | $\sigma$ | $\sigma_{AV}$ | $[mmmm]^d$ | $[2,1]^a$ | $[3,1]^a$ | $regio_{tot}^a$ | $regio_{tot,AV}^a$ |         | $M_n^c$ | $M_w^c$ | PDI |
| M31      | AB        | 0.32      | 0.9967   | 0.9967        | 98.36      | 1.41      | n.d.      | 1.41            | 1.41               | 143.0   | 284     | 549     | 1.9 |
|          |           | 0.32      | 0.9967   |               | 98.36      | 1.41      | n.d.      | 1.41            |                    |         | 301     | 602     | 2.0 |
| M32      | AB        | 0.31      | 0.9968   | 0.9969        | 98.41      | 0.94      | 0.11      | 1.05            | 1.06               | 148.0   | 669     | 1485    | 2.2 |
|          |           | 0.31      | 0.9968   |               | 98.41      | 0.94      | 0.11      | 1.05            |                    |         | 580     | 1327    | 2.3 |
| M33      | AB        | 0.05      | 0.9995   | 0.9995        | 99.75      | 0.33      | n.d.      | 0.33            | 0.30               | 160.6   | 1074    | 2387    | 2.2 |
|          |           | 0.06      | 0.9994   |               | 99.70      | 0.29      | n.d.      | 0.29            |                    |         | 1028    | 2459    | 2.4 |
|          | TTB       | 0.04      | 0.9996   |               | 99.80      | 0.29      | n.d.      | 0.29            |                    |         | 749     | 1795    | 2.4 |
| M34      | AB        | <0.02     | >0.9998  | >0.9998       | >99.90     | 0.64      | 0.18      | 0.82            | 0.83               | 154.3   | 991     | 2405    | 2.4 |
|          |           | <0.02     | >0.9998  |               | >99.90     | 0.64      | 0.20      | 0.84            |                    |         | 994     | 2108    | 2.1 |
| M35      | AB        | 0.04      | 0.9996   | 0.9996        | 99.80      | 0.29      | 0.07      | 0.36            | 0.36               | 159.7   | 499     | 1136    | 2.3 |
|          |           | 0.03      | 0.9997   |               | 99.85      | 0.30      | 0.05      | 0.35            |                    |         | 527     | 1251    | 2.4 |
| M36      | AB        | 2.20      | 0.974    | 0.9715        | 87.66      | n.d.      | 0.09      | 0.09            | 0.09               | 137.2   | 18      | 34      | 1.9 |
|          |           | 2.40      | 0.969    |               | 85.43      | n.d.      | 0.08      | 0.08            |                    |         | 20      | 33      | 1.7 |
| M37      | AB        | 0.11      | 0.9989   | 0.9989        | 99.45      | 0.19      | 0.02      | 0.21            | 0.20               | 160.5   | 214     | 437     | 2.0 |
|          |           | 0.12      | 0.9988   |               | 99.40      | 0.18      | 0.02      | 0.20            |                    |         | 222     | 479     | 2.2 |
| M38      | AB        | 0.04      | 0.9996   | 0.9996        | 99.80      | 0.20      | n.d.      | 0.20            | 0.20               | 161.5   | 721     | 1737    | 2.4 |
|          |           | 0.04      | 0.9996   |               | 99.80      | 0.20      | n.d.      | 0.20            |                    |         | 886     | 1927    | 2.2 |
| M39      | AB        | 0.03      | 0.9997   | 0.9996        | 99.85      | 0.18      | n.d.      | 0.18            | 0.18               | 161.7   | 608     | 1323    | 2.2 |
|          |           | 0.05      | 0.9995   |               | 99.75      | 0.18      | n.d.      | 0.18            |                    |         | 869     | 1999    | 2.3 |
| M40      | AB        | 0.05      | 0.9995   | 0.9995        | 99.75      | 0.11      | n.d.      | 0.11            | 0.11               | 163.1   | 627     | 1481    | 2.4 |
|          |           | 0.05      | 0.9995   |               | 99.75      | 0.11      | n.d.      | 0.11            |                    |         | 617     | 1485    | 2.4 |
| M41      | AB        | 0.04      | 0.9996   | 0.9996        | 99.80      | 0.34      | 0.02      | 0.36            | 0.36               | 159.7   | 781     | 1702    | 2.2 |
|          |           | 0.04      | 0.9996   |               | 99.80      | 0.33      | 0.02      | 0.35            |                    |         | 746     | 1575    | 2.1 |
| M42      | AB        | 0.05      | 0.9995   | 0.9995        | 99.75      | 0.19      | n.d.      | 0.19            | 0.20               | 161.6   | 589     | 1172    | 2.0 |
|          |           | 0.06      | 0.9994   |               | 99.70      | 0.20      | n.d.      | 0.20            |                    |         | 514     | 1086    | 2.1 |
| M43      | AB        | 0.03      | 0.9997   | 0.9997        | 99.85      | 0.17      | n.d.      | 0.17            | 0.17               | 162.6   | 511     | 1099    | 2.2 |
|          |           | 0.03      | 0.9997   |               | 99.85      | 0.17      | n.d.      | 0.17            |                    |         | 428     | 947     | 2.2 |
| M3       | AB        | 0.77      | 0.992    | 0.9920        | 96.06      | 0.91      | n.d.      | 0.91            | 0.91               | 143.3   | 134     | 314     | 2.3 |
|          |           | 0.77      | 0.992    |               | 96.06      | 0.91      | n.d.      | 0.91            |                    |         | 137     | 293     | 2.1 |

Table S3. Performance of selected catalysts when activated with MAO.

| Catalyst   | MAO ratio | $n_{cat}$ (nmol) | $t$ (s) | Yield (mg) | $R_p^a$              |
|------------|-----------|------------------|---------|------------|----------------------|
| <b>M2</b>  | 15,000    | 2                | 400     | 70         | <b>315</b>           |
| <b>M14</b> | 15,000    | 2                | 970     | 46         | <b>85</b>            |
| <b>M29</b> | 10,000    | 3                | 1110    | 49         | <b>53</b>            |
| <b>M30</b> | 7,500     | 4                | 2085    | 113        | <b>49</b>            |
| <b>M39</b> | 15,000    | 2                | 764     | 64         | <b>151</b>           |
| <b>M40</b> | 15,000    | 2                | 387     | 121        | <b>566</b>           |
| <b>M41</b> | 500       | 30               | 3600    | 21         | <b>1<sup>b</sup></b> |
| <b>M42</b> | 15,000    | 2                | 980     | 41         | <b>65</b>            |
| <b>M43</b> | 15,000    | 2                | 1410    | 35         | <b>47</b>            |

<sup>a</sup> in kg mmol<sup>-1</sup> h<sup>-1</sup>. <sup>b</sup> **M41** shows a very long activation delay.

#### Experimental Trends -Deleterious Effect of 3-Position Substituents on Molar Mass Capability

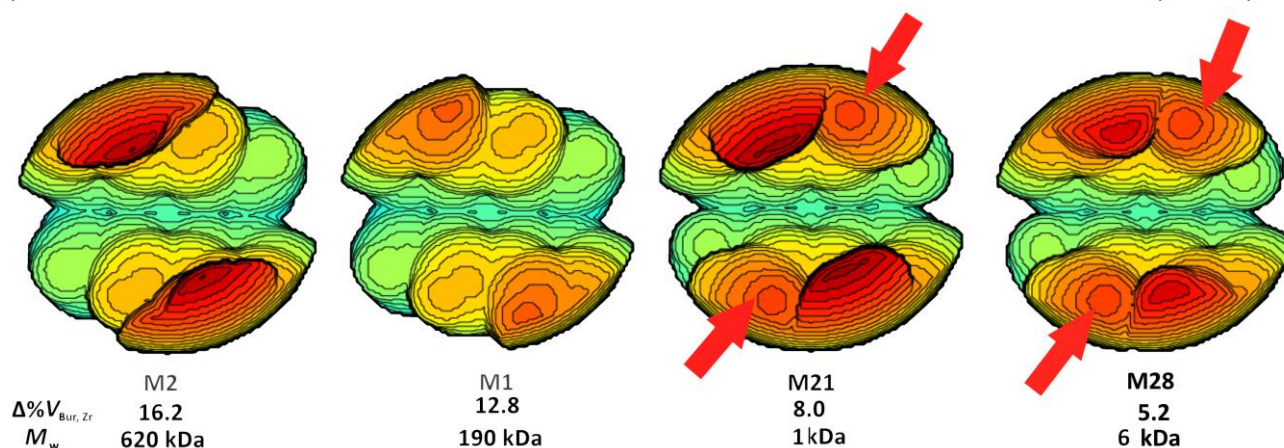

**Figure S39.** Steric heat maps of catalysts **M1**, **M2**, **M21** and **M28**. The deleterious effect of 3-position substitution – i.e. substituents in the open quadrant – on separation of steric bulk between the quadrants – and thus molecular weight capability – is clearly visible (indicated by red arrows). Heatmaps generated with SambVca 2.0, sphere size 5.0 Å.

### 3. QSAR Modeling

#### QSAR Modeling – General Comments

All metallocenes were optimized in **C<sub>2</sub>-symmetry**.

Experimental temperature: **60°C**.

The **stereoselectivity and regioselectivity model does not include** catalysts **M21** and **M28** for which no stereoselectivity/regioselectivity could be determined experimentally.

**M13 is neither included in the molecular weight model nor in the regioselectivity model.** This catalyst is the only one that brings steric bulk in the equatorial plane of the catalysts (right in front of the central metal). While a descriptor screening this bulk could have been developed, the lack of other examples would have precluded testing its validity. For a more extensive reasoning about the effects of steric bulk in the equatorial plane of the catalyst see *Macromolecules* **2018**, *51*, 8073-8083.

The **molecular weight model does not include** catalyst **M21**, as the experimentally determined  $M_w$  (1 kDa) is below the lower limit of the calibration range of the GPC measurements (3 kDa).

**Catalysts with  $\sigma > 0.9995$  ( $1-\sigma < 0.05$ ) are not included in the stereoselectivity model.** See main paper for details.

**Table S4.** Descriptor list and reasons for inclusion of the descriptor in the descriptor pool.

| #  | Descriptor                                                                                                                                                                                                                                                                         | Reason for inclusion in descriptor package                                                                                                                                                                                                                                                                                                                                                                                                                                                                                                                          |
|----|------------------------------------------------------------------------------------------------------------------------------------------------------------------------------------------------------------------------------------------------------------------------------------|---------------------------------------------------------------------------------------------------------------------------------------------------------------------------------------------------------------------------------------------------------------------------------------------------------------------------------------------------------------------------------------------------------------------------------------------------------------------------------------------------------------------------------------------------------------------|
| D1 | <p><b>%V<sub>Bur,Zr</sub></b><br/>The difference of hindered volume between open and closed quadrants of a 5.0 Å sphere centered on Zr analyzes the separation of steric bulk in the active pocket.</p>                                                                            | <p><b>Simple, yet powerful, descriptor based on possible orientations of the inserting monomer in 1,2 orientation; analyzes the space around the metal where the Me<sub>propene</sub> groups can be located.</b></p> <p>Established concept for stereoselectivity (see Dalton Trans. 2009, (41), 8885-8890 and Macromolecules 2018, 51, 8073-8083) and molecular weight capability (see ACS Catal. 2015, 6815-6822). For the connection of stereoselectivity and regioselectivity/molecular weight capability see Macromolecules 2018, 51, 8073-8083.</p>           |
| D2 | <p><b>%V<sub>Bur(C2+3)</sub></b><br/>The sum of hindered volumes in NE and SE quadrants of a 3.5 Å sphere centered on C3<br/>(Note: this descriptor accounts for the distribution of overall steric bulk at the 2- and 3-position of the indenyl fragment)</p>                     | <p><b>2-position substituents are spatially close to Me<sub>propene</sub> in 2,1-insertion TS and to the propene α-carbon in both chain transfer to monomer TS and 1,2 insertion TS. The close proximity of Me<sub>propene</sub> to 2-R substituent can lead to distortions even if the bulk of 2-R is oriented towards the back of the catalyst.</b></p> <p>2-position substituents have dramatic effects on molecular regioselectivity and molecular weight capability. However, bulkier substituents have opposite effects on both performance indicators.</p>   |
| D3 | <p><b>%V<sub>Bur(C2+C3),Front</sub></b><br/>The hindered volume in NE quadrant of a 3.5 Å sphere centered on C1<br/>(Note: this descriptor accounts for the fraction of overall steric bulk at the 2- and 3-position of the indenyl fragment oriented towards the active site)</p> |                                                                                                                                                                                                                                                                                                                                                                                                                                                                                                                                                                     |
| D4 | <p><b>%V<sub>Bur(C5+C6)</sub></b><br/>The hindered volume in SE quadrant of a 6.5 Å sphere centered on C1<br/>(Note: this descriptor accounts for the steric bulk contributions from remote 5- and 6-position of the indenyl fragment)</p>                                         | <p><b>The interference of Me<sub>propene</sub> with the indenyl backbone and/or the 2-R substituent distorts the 2,1 insertion geometry with the chain going up and the inserting monomer going down. This increases H<sub>monomer</sub>-H<sub>6-R</sub> contact distances. This region of space comes into closer contact with the bulkier chain transfer to monomer TS and with substituents in 2-position.</b></p> <p>Bulky substituents in 6-position have an evident and opposing experimental effects on regioselectivity and molecular weight capability</p> |
| D5 | <p><b>%V<sub>Bur,C4</sub></b><br/>The hindered volume in SW quadrant of a 3.5 Å sphere centered 2.0 Å away from the Cl atom on an extension of the Zr-Cl bond<br/>(Note: this descriptor accounts for remote steric bulk originating from the substituent at 4-position)</p>       | <p><b>Substituents in this region of space do not interfere with the preferred insertion pathway. However, the bulkier chain transfer to monomer TS or the spatial change of the polymeryl chain in the 2,1 insertion TS (see Figure S40 for an illustration) lead to close contacts.</b></p> <p>Both regioselectivity and molecular weight capability are positively influenced.</p>                                                                                                                                                                               |
| D6 | <p><b>%V<sub>Bur,open</sub></b><br/>The hindered volume in NW quadrant of a 3.0 Å sphere centered 1.5 Å in front of the Zr atom<br/>(Note: this descriptor measures the steric bulk in the open quadrants)</p>                                                                     | <p><b>Steric bulk in the open quadrants reduces the quadrant difference. This affects the preferred insertion pathway. Steric bulk obstructing this region has more dramatic effects than the quadrant difference alone would estimate.</b></p> <p>Molecular weight in particular is dramatically reduced upon 3-position substitution.</p>                                                                                                                                                                                                                         |
| D7 | <p><b>q<sub>ZrCl2</sub></b><br/>The NPA charge on the ZrCl<sub>2</sub> fragment</p>                                                                                                                                                                                                | <p>The electrophilicity of the metal could affect regio and/or molecular weight capability.</p>                                                                                                                                                                                                                                                                                                                                                                                                                                                                     |

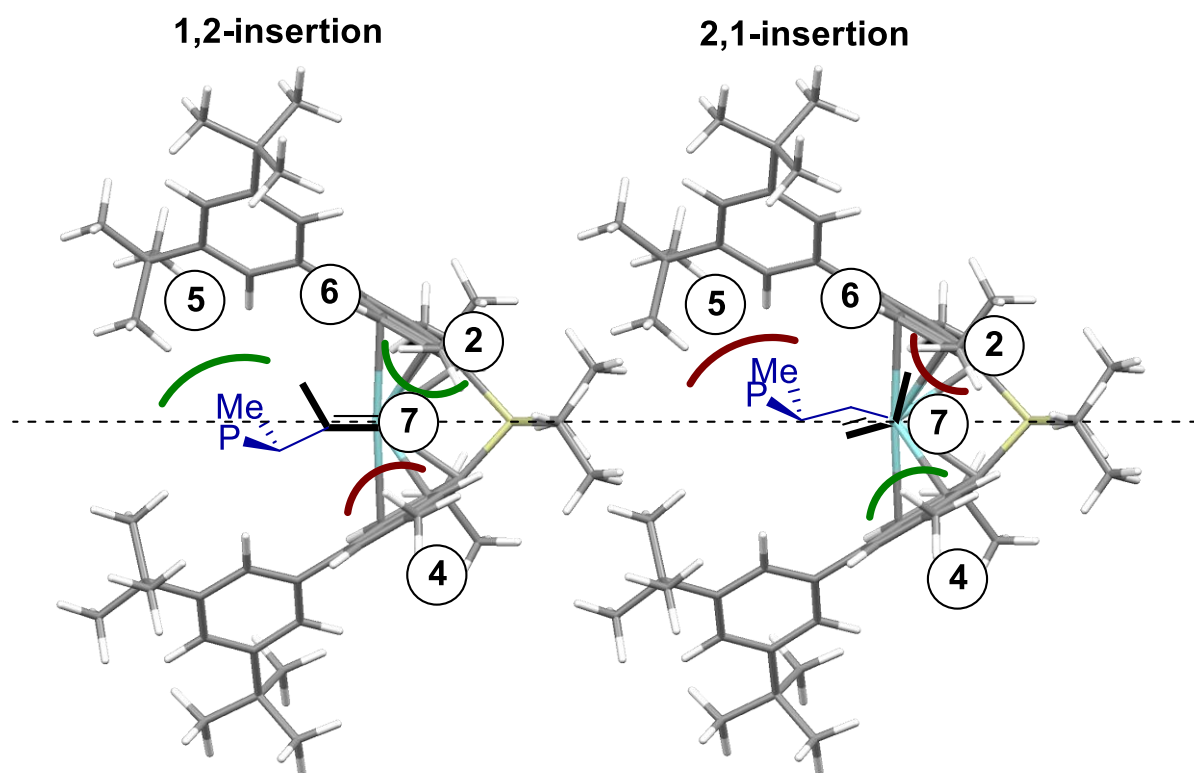

**Figure S40.** Differences between propene 1,2 and 2,1 insertion TS for **M39**. Dichloride geometry (ligand environment) overlaid with line drawing depiction of the TS geometry. Numbers reflect approximate positions of the scanning spheres used by the descriptors and are numbered as in **Figure 5** and **Table 8** (main paper). The distortion of the TS for 2,1 insertion (olefin down, chain up) with respect to 1,2 insertion (olefin and chain in one plane) brings the chain closer to remote steric bulk on 4-R substituents, but moves the C-H propene bonds further away from steric bulk in 5- and 6-position. Therefore, steric bulk in certain regions affects one of the two TS more (red curved lines) and one less (green curved lines).



**Table S5.** Procedures for Descriptor Determination.

| #  | Descriptor                      | SambVca (D1-D6) or Gaussian (D7) procedure           |                                                                                                                                                                                   |
|----|---------------------------------|------------------------------------------------------|-----------------------------------------------------------------------------------------------------------------------------------------------------------------------------------|
| D1 | $\Delta\%V_{\text{Bur,Zr}}$     | Coordinate System                                    | center of the Sphere: Zr, z-axis: Si-Zr, xz-plane: Cl                                                                                                                             |
|    |                                 | Deleted Atoms                                        | ZrCl <sub>2</sub> + SiR <sub>2</sub> bridge + all atoms in 5-, 6-, and 7-position + additional atoms on the 2-position substituent (for details see Table S7 and Figures S41-S43) |
|    |                                 | Sphere Size and Position                             | 5.0 Å, Center on Zr                                                                                                                                                               |
| D2 | $\%V_{\text{Bur(C2+C3)}}$       | Coordinate System                                    | center of the Sphere: C3, z-axis: middle of the two opposite C-atoms, xz-plane: C2                                                                                                |
|    |                                 | Deleted Atoms                                        | ZrCl <sub>2</sub> , SiR <sub>2</sub> bridge                                                                                                                                       |
|    |                                 | Sphere Size and Position                             | 3.5 Å, Center on C3                                                                                                                                                               |
| D3 | $\%V_{\text{Bur(C2+C3),Front}}$ | Coordinate System                                    | center of the Sphere: Cl, z-axis: Zr-Cl, xz-plane: Si                                                                                                                             |
|    |                                 | Deleted Atoms                                        | ZrCl <sub>2</sub>                                                                                                                                                                 |
|    |                                 | Sphere Size and Position                             | 3.5 Å, Center on Cl                                                                                                                                                               |
| D4 | $\%V_{\text{Bur(C5+C6)}}$       | Coordinate System                                    | center of the Sphere: Cl, z-axis: Zr-Cl, xz-plane: Si                                                                                                                             |
|    |                                 | Deleted Atoms                                        | ZrCl <sub>2</sub> , SiR <sub>2</sub> bridge                                                                                                                                       |
|    |                                 | Sphere Size and Position                             | 6.5 Å, Center on Cl                                                                                                                                                               |
| D5 | $\%V_{\text{Bur,C4}}$           | Coordinate System                                    | center of the Sphere: Cl, z-axis: Zr-Cl, xz-plane: Si                                                                                                                             |
|    |                                 | Deleted Atoms                                        | ZrCl <sub>2</sub>                                                                                                                                                                 |
|    |                                 | Sphere Size and Position                             | 3.5 Å, Center +2 Å away from Cl                                                                                                                                                   |
| D6 | $\%V_{\text{Bur,open}}$         | Coordinate System                                    | center of the Sphere: Zr, z-axis: Si-Zr, xz-plane: Cl                                                                                                                             |
|    |                                 | Deleted Atoms                                        | ZrCl <sub>2</sub>                                                                                                                                                                 |
|    |                                 | Sphere Size and Position                             | 3.0 Å, Center +1.5 Å away from Cl                                                                                                                                                 |
| D7 | $q_{\text{ZrCl}_2}$             | Sum of the NPA charges (NBO 3.0) on Zr and Cl atoms* |                                                                                                                                                                                   |

\* Charge Model 5 and Hirshfeld charges were also tested but provide a worse correlation.

Equations

**Stereoselectivity:**

$$\Delta\Delta G^{\ddagger}_{\text{enantio, exp}} = RT \ln (\sigma/(1-\sigma)) \quad (\text{Eq. S1})$$

**Regioselectivity:**

$$\Delta\Delta G^{\ddagger}_{\text{regiotot, exp}} = RT \ln ((\text{regio}_{\text{tot}}/100)/1-(\text{regio}_{\text{tot}}/100)) \quad (\text{Eq. S2})$$

**Molecular Weight Capability:**

$$\Delta\Delta G^{\ddagger}_{\text{T, exp}} = RT \ln (M_n * 1000/\text{MW}_{\text{propene}}) \quad (\text{Eq. S3})$$

**Table S6.** Experimental data used for QSAR modeling. Catalysts ordered by increasing molecular weight capability.

|              | $regio_{tot}$<br>(mol%) | $\sigma$ | $M_n$<br>(kDa) | $\Delta\Delta G^{\ddagger}_{regiotot, exp}$<br>(kcal/mol) | $\Delta\Delta G^{\ddagger}_{enantio, exp}$<br>(kcal/mol) | $\Delta\Delta G^{\ddagger}_{T, exp}$<br>(kcal/mol) |
|--------------|-------------------------|----------|----------------|-----------------------------------------------------------|----------------------------------------------------------|----------------------------------------------------|
| Training Set |                         |          |                |                                                           |                                                          |                                                    |
| <b>M21</b>   | N/A                     | N/A      | 1              | N/A                                                       | N/A                                                      | 2.10                                               |
| <b>M28</b>   | N/A                     | N/A      | 3              | N/A                                                       | N/A                                                      | 2.89                                               |
| <b>M36</b>   | 0.09                    | 0.972    | 19             | 4.67                                                      | 2.35                                                     | 4.05                                               |
| <b>M13</b>   | 0.40                    | 0.9997   | 80             | 3.67                                                      | 5.37                                                     | 5.00                                               |
| <b>M7</b>    | 0.67                    | 0.9960   | 80             | 3.33                                                      | 3.65                                                     | 5.00                                               |
| <b>M18</b>   | 0.66                    | 0.9959   | 90             | 3.34                                                      | 3.64                                                     | 5.08                                               |
| <b>M1</b>    | 0.29                    | 0.9865   | 100            | 3.89                                                      | 2.84                                                     | 5.15                                               |
| <b>M8</b>    | 0.74                    | 0.9962   | 100            | 3.26                                                      | 3.69                                                     | 5.15                                               |
| <b>M22</b>   | 0.90                    | 0.9917   | 130            | 3.13                                                      | 3.17                                                     | 5.32                                               |
| <b>M6</b>    | 0.82                    | 0.9960   | 140            | 3.19                                                      | 3.65                                                     | 5.37                                               |
| <b>M3</b>    | 0.91                    | 0.992    | 140            | 3.12                                                      | 3.19                                                     | 5.37                                               |
| <b>M17</b>   | 0.79                    | 0.9963   | 140            | 3.22                                                      | 3.70                                                     | 5.37                                               |
| <b>M5</b>    | 0.53                    | 0.9960   | 150            | 3.49                                                      | 3.65                                                     | 5.41                                               |
| <b>M37</b>   | 0.21                    | 0.9989   | 220            | 4.11                                                      | 4.51                                                     | 5.67                                               |
| <b>M4</b>    | 0.50                    | 0.9971   | 230            | 3.53                                                      | 3.87                                                     | 5.70                                               |
| <b>M10</b>   | 0.40                    | 0.9986   | 230            | 3.67                                                      | 4.35                                                     | 5.70                                               |
| <b>M11</b>   | 0.30                    | 0.9986   | 250            | 3.87                                                      | 4.35                                                     | 5.75                                               |
| <b>M15</b>   | 0.42                    | 0.9984   | 290            | 3.64                                                      | 4.26                                                     | 5.85                                               |
| <b>M12</b>   | 0.32                    | 0.9989   | 290            | 3.82                                                      | 4.51                                                     | 5.85                                               |
| <b>M31</b>   | 1.41                    | 0.9967   | 290            | 2.83                                                      | 3.78                                                     | 5.85                                               |
| <b>M9</b>    | 0.29                    | 0.9989   | 320            | 3.89                                                      | 4.51                                                     | 5.92                                               |
| <b>M2</b>    | 0.32                    | 0.9988   | 320            | 3.82                                                      | 4.45                                                     | 5.92                                               |
| <b>M23</b>   | 0.28                    | 0.9991   | 380            | 3.91                                                      | 4.64                                                     | 6.03                                               |
| <b>M29</b>   | 0.23                    | 0.9997   | 400            | 4.04                                                      | 5.37                                                     | 6.06                                               |
| <b>M16</b>   | 0.18                    | 0.9994   | 410            | 4.21                                                      | 4.91                                                     | 6.08                                               |
| <b>M19</b>   | 0.42                    | 0.9999   | 470            | 3.64                                                      | 6.10                                                     | 6.17                                               |
| <b>M26</b>   | 0.43                    | 0.9991   | 480            | 3.63                                                      | 4.64                                                     | 6.18                                               |
| <b>M27</b>   | 0.98                    | 0.9978   | 490            | 3.07                                                      | 4.05                                                     | 6.20                                               |
| <b>M35</b>   | 0.36                    | 0.9997   | 510            | 3.75                                                      | 5.37                                                     | 6.22                                               |
| <b>M14</b>   | 0.17                    | 0.9994   | 530            | 4.25                                                      | 4.91                                                     | 6.25                                               |
| <b>M20</b>   | 0.48                    | 0.9999   | 610            | 3.55                                                      | 6.10                                                     | 6.34                                               |
| <b>M32</b>   | 1.05                    | 0.9969   | 620            | 3.03                                                      | 3.82                                                     | 6.35                                               |
| <b>M24</b>   | 0.54                    | 0.999    | 630            | 3.47                                                      | 4.57                                                     | 6.36                                               |
| <b>M25</b>   | 0.69                    | 0.9989   | 710            | 3.31                                                      | 4.51                                                     | 6.44                                               |
| <b>M38</b>   | 0.20                    | 0.9996   | 800            | 4.14                                                      | 5.18                                                     | 6.52                                               |
| <b>M34</b>   | 0.83                    | 0.9998   | 990            | 3.19                                                      | 5.64                                                     | 6.66                                               |
| <b>M33</b>   | 0.30                    | 0.9995   | 950            | 3.87                                                      | 5.03                                                     | 6.64                                               |
| <b>M30</b>   | 0.71                    | 0.9997   | 1400           | 3.29                                                      | 5.37                                                     | 6.89                                               |

**Table S6 (ctd.).** Experimental data used for QSAR modeling. Catalysts ordered by increasing molecular weight capability.

|                     | <i>regio</i> <sub>tot</sub><br>(mol%) | $\sigma$ | <i>M<sub>n</sub></i><br>(kDa) | $\Delta\Delta G^{\ddagger}_{\text{regiotot, exp}}$<br>(kcal/mol) | $\Delta\Delta G^{\ddagger}_{\text{enantio, exp}}$<br>(kcal/mol) | $\Delta\Delta G^{\ddagger}_{\text{T, exp}}$<br>(kcal/mol) |
|---------------------|---------------------------------------|----------|-------------------------------|------------------------------------------------------------------|-----------------------------------------------------------------|-----------------------------------------------------------|
| Optimized Catalysts |                                       |          |                               |                                                                  |                                                                 |                                                           |
| <b>M39</b>          | 0.18                                  | 0.9996   | 740                           | 4.21                                                             | 5.18                                                            | 6.47                                                      |
| <b>M40</b>          | 0.11                                  | 0.9995   | 620                           | 4.54                                                             | 5.03                                                            | 6.35                                                      |
| <b>M41</b>          | 0.35                                  | 0.9996   | 760                           | 3.76                                                             | 5.18                                                            | 6.49                                                      |
| <b>M42</b>          | 0.20                                  | 0.9995   | 550                           | 4.14                                                             | 5.03                                                            | 6.27                                                      |
| <b>M43</b>          | 0.17                                  | 0.9997   | 470                           | 4.35                                                             | 5.37                                                            | 6.17                                                      |

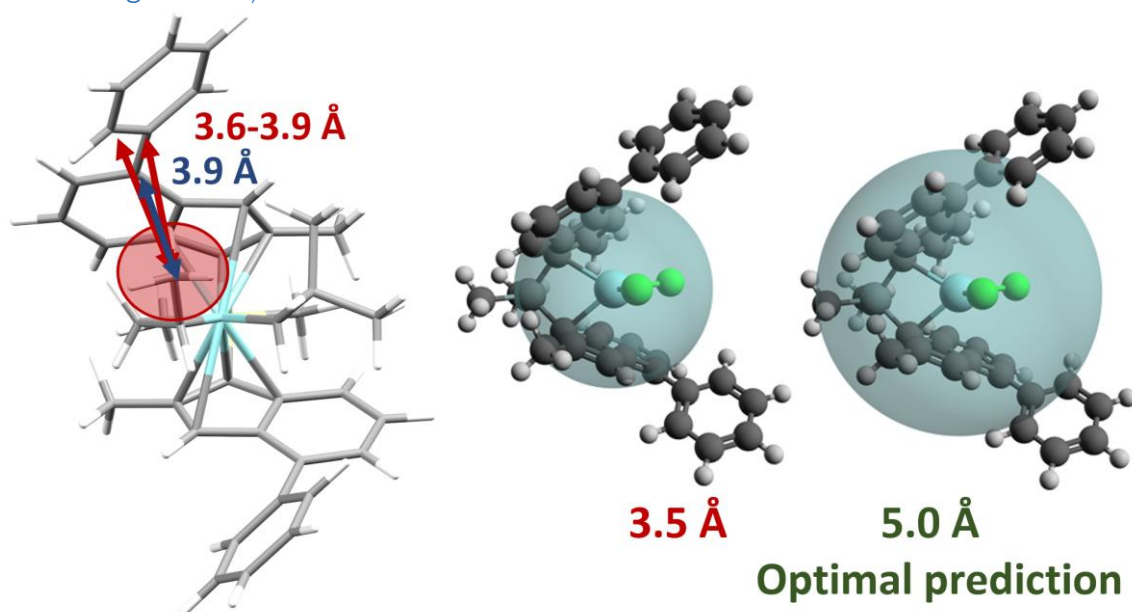

**Figure S41.** Rationale for increased scanning sphere size to determine %V<sub>Bur,Zr</sub> on the example of **M2**. Steric bulk further away from the active pocket, i.e. 4-Ph *ipso*- and *ortho*-carbons are as close or closer to the Me<sub>propene</sub> group in the TS leading to stereoerrors than the carbon in 4-position of the indenyl fragment. A larger sphere is needed to account for these influences. See *Macromolecules* **2018**, 51, 8073-8083 for further details.

| Catalyst   | 6-position<br>substituent | $\sigma$ |
|------------|---------------------------|----------|
| <b>M2</b>  | H                         | 0.9988   |
| <b>M23</b> | Me                        | 0.9991   |
| <b>M24</b> | iPr                       | 0.9990   |
| <b>M25</b> | tBu                       | 0.9989   |
| <b>M26</b> | Ph                        | 0.9991   |

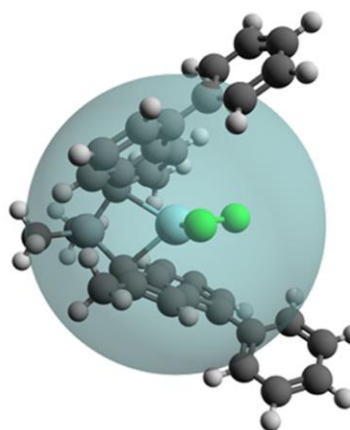

**Figure S42.** Rationale for deletion of atoms or groups in 5-, 6-, 7-position and the Si-bridge to determine %V<sub>Bur,Zr</sub>. Due to the increased scanning sphere size necessary to screen steric influence originating from the 4-position, other positions which are inconsequential for stereoselectivity (see examples for various 6-position substituents) are also screened. To correct for this bias, these atoms or groups were deleted.

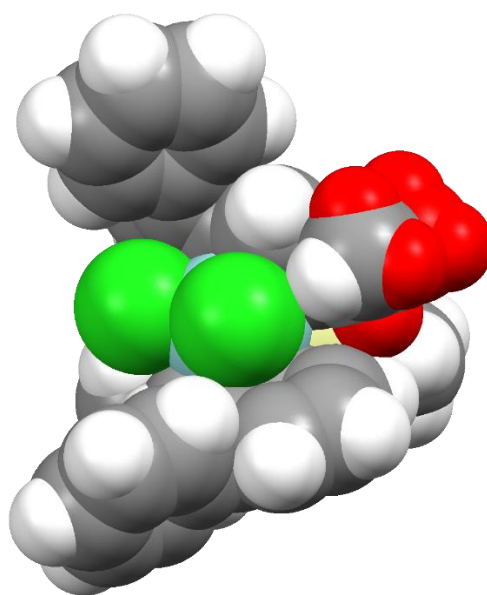

**Figure S43.** Exclusion of atoms of 2-position substituents not in line-of-sight of the active center for calculation of % $V_{\text{Bur,Zr}}$ . Space filling model of **M36**. Additionally deleted atoms are marked in red. The deleted atoms point to the back of the catalyst and other atoms in front of them already block the space. This approach avoids ‘double counting’ of steric bulk. Picture generated with Mercury 4.2

## QSAR Modeling – Equations for Stereo-, Regioselectivity and Molecular Weight Capability Models

### Stereoselectivity Model

$$\Delta\Delta G^{\ddagger}_{\text{enantio, exp}} = \quad (\text{Eq. S4})$$
$$0.474 \Delta\%V_{\text{Bur, Zr}} - 3.247$$

### Molecular Weight Model

$$\Delta\Delta G^{\ddagger}_{\text{T, exp}} = \quad (\text{Eq. S5})$$
$$0.127 \Delta\%V_{\text{Bur, Zr}} + 0.023 \%V_{\text{Bur, C4}} + 0.039 \%V_{\text{Bur, C5-6}} - 0.220 \%V_{\text{Bur, open}} - 0.099 \%V_{\text{Bur, C2-3-Front}} + 13.971$$

### Regioselectivity Model

$$\Delta\Delta G^{\ddagger}_{\text{regiotot, exp}} = \quad (\text{Eq. S6})$$
$$-14.267 \text{ e-ZrCl}_2, \text{ NPA} + 0.043 \%V_{\text{Bur, C2-3-All}} + 0.031 \%V_{\text{Bur, C4}} - 0.031 \%V_{\text{Bur, C5-6}} - 0.529 \%V_{\text{Bur, open}} + 23.619$$

# QSAR Modeling – Stereoselectivity Model

**Table S7.** Stereoselectivity ( $\sigma$  and  $\Delta\Delta G^\ddagger_{\text{enantio, exp}}$ ),  $\%V_{\text{Bur, Zr}}$ , and predicted  $\Delta\Delta G^\ddagger_{\text{enantio, QSAR}}$ .

| Catalyst                                                           | deleted atoms*                            | $\sigma_{\text{exp}}$ | $\Delta\Delta G^\ddagger_{\text{enantio, exp}}$<br>(kcal/mol) | $\Delta\%V_{\text{Bur, Zr}}$ | $\Delta\Delta G^\ddagger_{\text{enantio, QSAR}}$<br>(kcal/mol) |
|--------------------------------------------------------------------|-------------------------------------------|-----------------------|---------------------------------------------------------------|------------------------------|----------------------------------------------------------------|
| <b>M36</b>                                                         | 2-iPr: far H, far Me, 2 far H on close Me | 0.9720                | 2.35                                                          | 11.40                        | 2.15                                                           |
| <b>M7</b>                                                          | 2-Me: far H                               | 0.9960                | 3.65                                                          | 15.40                        | 4.05                                                           |
| <b>M18</b>                                                         | 2-Me: far H                               | 0.9959                | 3.64                                                          | 15.30                        | 4.00                                                           |
| <b>M1</b>                                                          | 2-Me: far H                               | 0.9865                | 2.84                                                          | 12.80                        | 2.82                                                           |
| <b>M8</b>                                                          | 2-Me: far H                               | 0.9962                | 3.69                                                          | 15.00                        | 3.86                                                           |
| <b>M22</b>                                                         | 2-Me: far H                               | 0.9917                | 3.17                                                          | 13.10                        | 2.96                                                           |
| <b>M6</b>                                                          | 2-Me: far H                               | 0.9960                | 3.65                                                          | 14.80                        | 3.76                                                           |
| <b>M3</b>                                                          | 2-Me: far H                               | 0.9920                | 3.19                                                          | 13.30                        | 3.05                                                           |
| <b>M17</b>                                                         | 2-Me: far H                               | 0.9963                | 3.70                                                          | 14.80                        | 3.76                                                           |
| <b>M5</b>                                                          | 2-Me: far H                               | 0.9960                | 3.65                                                          | 14.90                        | 3.81                                                           |
| <b>M37</b>                                                         | 2-Et: far Me                              | 0.9989                | 4.51                                                          | 16.20                        | 4.43                                                           |
| <b>M4</b>                                                          | 2-Me: far H                               | 0.9971                | 3.87                                                          | 15.30                        | 4.00                                                           |
| <b>M10</b>                                                         | 2-Me: far H                               | 0.9986                | 4.35                                                          | 16.10                        | 4.38                                                           |
| <b>M11</b>                                                         | 2-Me: far H                               | 0.9986                | 4.35                                                          | 16.10                        | 4.38                                                           |
| <b>M15</b>                                                         | 2-Me: far H                               | 0.9984                | 4.26                                                          | 16.30                        | 4.47                                                           |
| <b>M12</b>                                                         | 2-Me: far H                               | 0.9989                | 4.51                                                          | 16.30                        | 4.47                                                           |
| <b>M31</b>                                                         | 2-Me: far H                               | 0.9967                | 3.78                                                          | 14.90                        | 3.81                                                           |
| <b>M9</b>                                                          | 2-Me: far H                               | 0.9989                | 4.51                                                          | 16.30                        | 4.47                                                           |
| <b>M2</b>                                                          | 2-Me: far H                               | 0.9988                | 4.45                                                          | 16.20                        | 4.43                                                           |
| <b>M23</b>                                                         | 2-Me: far H                               | 0.9991                | 4.64                                                          | 16.30                        | 4.47                                                           |
| <b>M16</b>                                                         | 2-Me: far H                               | 0.9994                | 4.91                                                          | 16.80                        | 4.71                                                           |
| <b>M26</b>                                                         | 2-Me: far H                               | 0.9991                | 4.64                                                          | 16.30                        | 4.47                                                           |
| <b>M27</b>                                                         | 2-Me: far H                               | 0.9978                | 4.05                                                          | 16.00                        | 4.33                                                           |
| <b>M14</b>                                                         | 2-Me: far H                               | 0.9994                | 4.91                                                          | 16.80                        | 4.71                                                           |
| <b>M32</b>                                                         | 2-Me: far H                               | 0.9969                | 3.82                                                          | 15.20                        | 3.95                                                           |
| <b>M24</b>                                                         | 2-Me: far H                               | 0.9990                | 4.57                                                          | 16.20                        | 4.43                                                           |
| <b>M25</b>                                                         | 2-Me: far H                               | 0.9989                | 4.51                                                          | 16.20                        | 4.43                                                           |
| <b>M33</b>                                                         | 2-Me: far H                               | 0.9995                | 5.03                                                          | 16.70                        | 4.66                                                           |
| <b>Not Included in the model (<math>\sigma &gt; 0.9995</math>)</b> |                                           |                       |                                                               |                              |                                                                |
| <b>M30</b>                                                         | 2-Me: far H                               | 0.9998                | 5.37                                                          | 17.60                        | 5.09                                                           |
| <b>M13</b>                                                         | 2-Me: far H                               | 0.9997                | 5.37                                                          | 19.00                        | 5.75                                                           |
| <b>M29</b>                                                         | 2-Me: far H                               | 0.9997                | 5.37                                                          | 16.20                        | 4.43                                                           |
| <b>M19</b>                                                         | 2-Me: far H                               | >0.9998               | >5.64                                                         | 17.60                        | 5.09                                                           |
| <b>M35</b>                                                         | 2-Me: far H                               | 0.9997                | 5.37                                                          | 17.90                        | 5.23                                                           |
| <b>M20</b>                                                         | 2-Me: far H                               | >0.9998               | >5.64                                                         | 17.65                        | 5.11                                                           |
| <b>M34</b>                                                         | 2-Me: far H                               | >0.9998               | >5.64                                                         | 17.70                        | 5.14                                                           |
| <b>M38</b>                                                         | 2-Me: far H                               | 0.9996                | 5.18                                                          | 18.20                        | 5.37                                                           |

\*5-, 6-, 7-position substituents and the bridge were generally deleted for  $\Delta\%V_{\text{Bur, Zr}}$  determination.



**Table S8.** Stereoselectivity Model Deviations.

| Catalyst                                        | $ \Delta _{\text{exp-pred}}$<br>(kcal/mol) | $ \Delta ^2_{\text{exp-pred}}$ | $\sigma_{\text{QSAR}}$ | $ \Delta _{\text{exp-pred}}$ | $ \Delta ^2_{\text{exp-pred}}$ |
|-------------------------------------------------|--------------------------------------------|--------------------------------|------------------------|------------------------------|--------------------------------|
| M36                                             | 0.20                                       | 0.04                           | 0.96126                | 0.01074                      | 0.00012                        |
| M7                                              | 0.39                                       | 0.16                           | 0.99778                | 0.00178                      | 0.00000                        |
| M18                                             | 0.36                                       | 0.13                           | 0.99762                | 0.00172                      | 0.00000                        |
| M1                                              | 0.03                                       | 0.00                           | 0.98577                | 0.00073                      | 0.00000                        |
| M8                                              | 0.17                                       | 0.03                           | 0.99705                | 0.00085                      | 0.00000                        |
| M22                                             | 0.21                                       | 0.04                           | 0.98852                | 0.00318                      | 0.00001                        |
| M6                                              | 0.11                                       | 0.01                           | 0.99660                | 0.00060                      | 0.00000                        |
| M3                                              | 0.14                                       | 0.02                           | 0.99005                | 0.00195                      | 0.00000                        |
| M17                                             | 0.06                                       | 0.00                           | 0.99660                | 0.00030                      | 0.00000                        |
| M5                                              | 0.16                                       | 0.02                           | 0.99683                | 0.00083                      | 0.00000                        |
| M37                                             | 0.08                                       | 0.01                           | 0.99875                | 0.00015                      | 0.00000                        |
| M4                                              | 0.13                                       | 0.02                           | 0.99762                | 0.00052                      | 0.00000                        |
| M10                                             | 0.03                                       | 0.00                           | 0.99866                | 0.00006                      | 0.00000                        |
| M11                                             | 0.03                                       | 0.00                           | 0.99866                | 0.00006                      | 0.00000                        |
| M15                                             | 0.21                                       | 0.04                           | 0.99884                | 0.00044                      | 0.00000                        |
| M12                                             | 0.04                                       | 0.00                           | 0.99884                | 0.00006                      | 0.00000                        |
| M31                                             | 0.03                                       | 0.00                           | 0.99683                | 0.00013                      | 0.00000                        |
| M9                                              | 0.04                                       | 0.00                           | 0.99884                | 0.00006                      | 0.00000                        |
| M2                                              | 0.03                                       | 0.00                           | 0.99875                | 0.00005                      | 0.00000                        |
| M23                                             | 0.17                                       | 0.03                           | 0.9988                 | 0.0003                       | 0.00000                        |
| M16                                             | 0.20                                       | 0.04                           | 0.9992                 | 0.0002                       | 0.00000                        |
| M26                                             | 0.17                                       | 0.03                           | 0.9988                 | 0.0003                       | 0.00000                        |
| M27                                             | 0.28                                       | 0.08                           | 0.9986                 | 0.0008                       | 0.00000                        |
| M14                                             | 0.20                                       | 0.04                           | 0.9992                 | 0.0002                       | 0.00000                        |
| M32                                             | 0.13                                       | 0.02                           | 0.9974                 | 0.0005                       | 0.00000                        |
| M24                                             | 0.15                                       | 0.02                           | 0.9988                 | 0.0002                       | 0.00000                        |
| M25                                             | 0.08                                       | 0.01                           | 0.9988                 | 0.0001                       | 0.00000                        |
| M33                                             | 0.37                                       | 0.14                           | 0.9991                 | 0.0004                       | 0.00000                        |
| Not Included in the model ( $\sigma > 0.9995$ ) |                                            |                                |                        |                              |                                |
| M30                                             | 0.55                                       | 0.30                           | 0.9995                 | 0.0003                       | 0.00000                        |
| M13                                             | 0.38                                       | 0.15                           | 0.9998                 | 0.0001                       | 0.00000                        |
| M29                                             | 0.94                                       | 0.89                           | 0.9988                 | 0.0009                       | 0.00000                        |
| M19                                             | 0.55                                       | 0.30                           | 0.9995                 | 0.0003                       | 0.00000                        |
| M35                                             | 0.14                                       | 0.02                           | 0.9996                 | 0.0001                       | 0.00000                        |
| M20                                             | 0.53                                       | 0.28                           | 0.9996                 | 0.0002                       | 0.00000                        |
| M34                                             | 0.50                                       | 0.25                           | 0.9996                 | 0.0002                       | 0.00000                        |
| M38                                             | 0.19                                       | 0.04                           | 0.9997                 | 0.0001                       | 0.00000                        |

**Table S9.** Mean average deviation (MAD), mean squared error (MSE) and root mean squared error (RMSE) for  $\Delta\Delta G^\ddagger_{\text{enantio QSAR}}$  and  $\sigma_{\text{QSAR}}$ .

| $\Delta\Delta G^\ddagger_{\text{enantio, QSAR}}$ |                                          | $\sigma_{\text{QSAR}}$ |        |
|--------------------------------------------------|------------------------------------------|------------------------|--------|
| MAD                                              | 0.15 kcal/mol                            | MAD                    | 0.0010 |
| MSE                                              | 0.03 kcal <sup>2</sup> /mol <sup>2</sup> | MSE                    | 0.0000 |
| RMSE                                             | 0.18 kcal/mol                            | RMSE                   | 0.0022 |

## QSAR Modeling – Stereoselectivity Model, Analysis of Variance

|                              |                     |                       |               |                |                       |                  |
|------------------------------|---------------------|-----------------------|---------------|----------------|-----------------------|------------------|
| SUMMARY OUTPUT               |                     |                       |               |                |                       |                  |
|                              |                     |                       |               |                |                       |                  |
| <i>Regression Statistics</i> |                     |                       |               |                |                       |                  |
| Multiple R                   | 0.9588573           |                       |               |                |                       |                  |
| R Square                     | 0.91940733          |                       |               |                |                       |                  |
| Adjusted R Square            | 0.91630761          |                       |               |                |                       |                  |
| Standard Error               | 0.18943287          |                       |               |                |                       |                  |
| Observations                 | 28                  |                       |               |                |                       |                  |
|                              |                     |                       |               |                |                       |                  |
| ANOVA                        |                     |                       |               |                |                       |                  |
|                              | <i>df</i>           | <i>SS</i>             | <i>MS</i>     | <i>F</i>       | <i>Significance F</i> |                  |
| Regression                   | 1                   | 10.64379365           | 10.64379      | 296.61         | 9.7503E-16            |                  |
| Residual                     | 26                  | 0.933005107           | 0.035885      |                |                       |                  |
| Total                        | 27                  | 11.57679875           |               |                |                       |                  |
|                              |                     |                       |               |                |                       |                  |
|                              | <i>Coefficients</i> | <i>Standard Error</i> | <i>t Stat</i> | <i>P-value</i> | <i>Lower 95%</i>      | <i>Upper 95%</i> |
| Intercept                    | -3.2466414          | 0.424780994           | -7.64309      | 4.12E-08       | -4.1197912            | -2.373492        |
| X Variable 1                 | 0.47357732          | 0.027497804           | 17.22237      | 9.75E-16       | 0.41705477            | 0.5300999        |

MEAN = mean experimental value; MAD = mean average deviation; MSE = mean squared error; RMSE = root mean squared error;  $q^2$  = cross-validated  $R^2$

|    | Catalyst | Yintercept | slopeA   | predictedEXP | actualEXP                                                                                                        | R <sup>2</sup> | adj. R <sup>2</sup> | Δ    | Δ <sup>2</sup> | (actualEXP-MEAN) <sup>2</sup> |
|----|----------|------------|----------|--------------|------------------------------------------------------------------------------------------------------------------|----------------|---------------------|------|----------------|-------------------------------|
| 1  | M36      | -3.65944   | 0.499654 | 2.04         | 2.35                                                                                                             | 0.90           | 0.89                | 0.31 | 0.10           | 2.87                          |
| 2  | M7       | -3.22867   | 0.47335  | 4.06         | 3.65                                                                                                             | 0.93           | 0.93                | 0.41 | 0.17           | 0.15                          |
| 3  | M18      | -3.21789   | 0.47256  | 4.01         | 3.64                                                                                                             | 0.93           | 0.93                | 0.37 | 0.14           | 0.16                          |
| 4  | M1       | -3.26831   | 0.474903 | 2.81         | 2.84                                                                                                             | 0.91           | 0.90                | 0.03 | 0.00           | 1.45                          |
| 5  | M8       | -3.21406   | 0.47185  | 3.86         | 3.69                                                                                                             | 0.92           | 0.92                | 0.17 | 0.03           | 0.12                          |
| 6  | M22      | -3.43628   | 0.485307 | 2.92         | 3.17                                                                                                             | 0.92           | 0.92                | 0.25 | 0.06           | 0.76                          |
| 7  | M6       | -3.21565   | 0.471822 | 3.77         | 3.65                                                                                                             | 0.92           | 0.92                | 0.12 | 0.01           | 0.15                          |
| 8  | M3       | -3.3552    | 0.48025  | 3.03         | 3.19                                                                                                             | 0.92           | 0.91                | 0.16 | 0.02           | 0.73                          |
| 9  | M17      | -3.22756   | 0.472475 | 3.77         | 3.7                                                                                                              | 0.92           | 0.92                | 0.07 | 0.00           | 0.12                          |
| 10 | M5       | -3.20986   | 0.47156  | 3.82         | 3.65                                                                                                             | 0.92           | 0.92                | 0.17 | 0.03           | 0.15                          |
| 11 | M37      | -3.22215   | 0.471765 | 4.42         | 4.51                                                                                                             | 0.92           | 0.92                | 0.09 | 0.01           | 0.22                          |
| 12 | M4       | -3.2336    | 0.473026 | 4.00         | 3.87                                                                                                             | 0.92           | 0.92                | 0.13 | 0.02           | 0.03                          |
| 13 | M10      | -3.24799   | 0.473718 | 4.38         | 4.35                                                                                                             | 0.92           | 0.92                | 0.03 | 0.00           | 0.09                          |
| 14 | M11      | -3.24799   | 0.473718 | 4.38         | 4.35                                                                                                             | 0.92           | 0.92                | 0.03 | 0.00           | 0.09                          |
| 15 | M15      | -3.30033   | 0.477571 | 4.48         | 4.26                                                                                                             | 0.92           | 0.92                | 0.22 | 0.05           | 0.05                          |
| 16 | M12      | -3.23208   | 0.472525 | 4.47         | 4.51                                                                                                             | 0.92           | 0.91                | 0.04 | 0.00           | 0.22                          |
| 17 | M31      | -3.23636   | 0.472968 | 3.81         | 3.78                                                                                                             | 0.92           | 0.92                | 0.03 | 0.00           | 0.07                          |
| 18 | M9       | -3.23208   | 0.472525 | 4.47         | 4.51                                                                                                             | 0.92           | 0.91                | 0.04 | 0.00           | 0.22                          |
| 19 | M2       | -3.23642   | 0.472838 | 4.42         | 4.45                                                                                                             | 0.92           | 0.92                | 0.03 | 0.00           | 0.17                          |
| 20 | M23      | -3.19659   | 0.469901 | 4.46         | 4.64                                                                                                             | 0.92           | 0.92                | 0.18 | 0.03           | 0.36                          |
| 27 | M16      | -3.15067   | 0.466823 | 4.69         | 4.91                                                                                                             | 0.92           | 0.91                | 0.22 | 0.05           | 0.75                          |
| 21 | M26      | -3.19659   | 0.469901 | 4.46         | 4.64                                                                                                             | 0.92           | 0.92                | 0.18 | 0.03           | 0.36                          |
| 22 | M27      | -3.28962   | 0.477036 | 4.34         | 4.05                                                                                                             | 0.93           | 0.92                | 0.29 | 0.09           | 0.00                          |
| 26 | M14      | -3.15067   | 0.466823 | 4.69         | 4.91                                                                                                             | 0.92           | 0.91                | 0.22 | 0.05           | 0.75                          |
| 23 | M32      | -3.22898   | 0.472733 | 3.96         | 3.82                                                                                                             | 0.92           | 0.92                | 0.14 | 0.02           | 0.05                          |
| 24 | M24      | -3.20788   | 0.470691 | 4.42         | 4.57                                                                                                             | 0.92           | 0.92                | 0.15 | 0.02           | 0.28                          |
| 25 | M25      | -3.22215   | 0.471765 | 4.42         | 4.51                                                                                                             | 0.92           | 0.92                | 0.09 | 0.01           | 0.22                          |
| 28 | M33      | -3.08828   | 0.462355 | 4.63         | 5.03                                                                                                             | 0.93           | 0.92                | 0.40 | 0.16           | 0.97                          |
|    |          |            |          |              | MEAN                                                                                                             |                |                     | MAD  |                |                               |
|    |          |            |          |              | 4.04                                                                                                             |                |                     | 0.16 | 0.04           |                               |
|    |          |            |          |              | MAX                                                                                                              |                |                     |      |                |                               |
|    |          |            |          |              | 5.03                                                                                                             |                |                     |      |                |                               |
|    |          |            |          |              | MIN                                                                                                              |                |                     |      |                |                               |
|    |          |            |          |              | 2.35                                                                                                             |                |                     |      |                |                               |
|    |          |            |          |              | $q^2 = \frac{\sum(\text{actualEXP} - \text{MEAN}) \cdot \sum(\Delta^2)}{\sum(\text{actualEXP} - \text{MEAN})^2}$ |                |                     |      |                |                               |
|    |          |            |          |              | $q^2$                                                                                                            |                |                     | 0.90 |                |                               |

predictedEXP vs. actualEXP

predictedEXP vs. actualEXP constrained

## QSAR Modeling – Molar Mass Capability Model, Single Descriptor Model

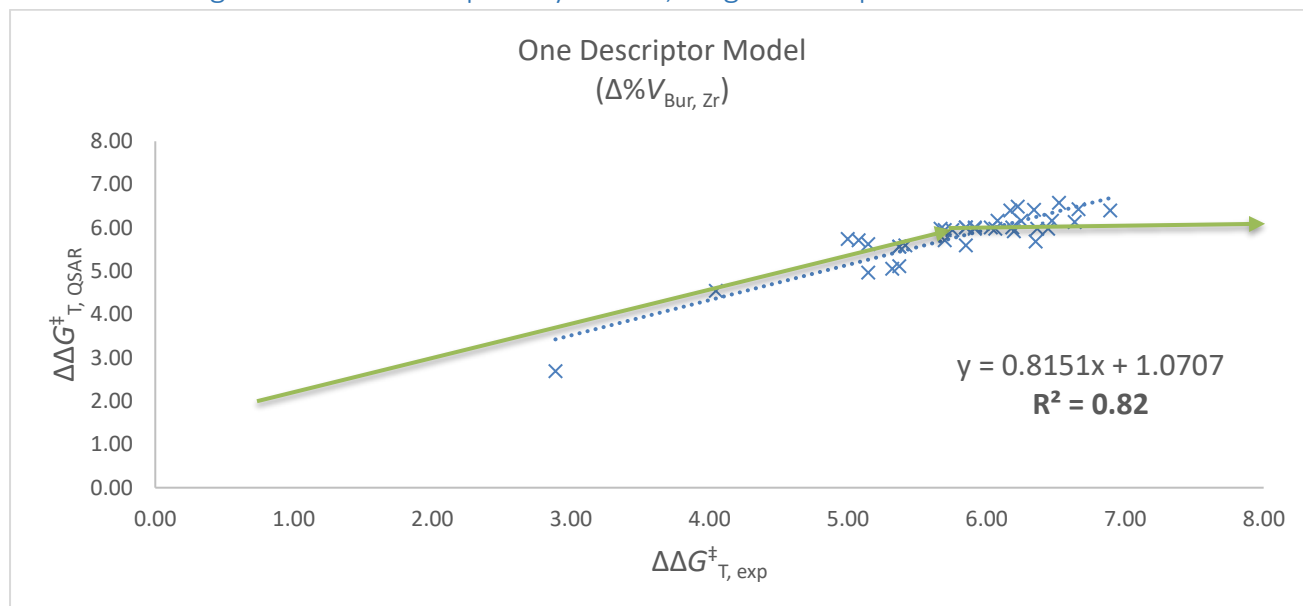

**Figure S44.** Correlation of predicted ( $\Delta\Delta G^{\ddagger}_{\text{T, QSAR}}$ ) and experimentally observed stereoselectivity ( $\Delta\Delta G^{\ddagger}_{\text{T, exp}}$ ) using a single descriptor model based on  $\Delta\%V_{\text{Bur, Zr}}$  (5.0 Å scanning sphere) showing that predicted molecular weight reaches a maximum before experimental molecular weight does. Green arrows added as guide for the eye.

| Regression Statistics |          |              |                |          |                |
|-----------------------|----------|--------------|----------------|----------|----------------|
| Multiple R            | 0.902822 |              |                |          |                |
| R Square              | 0.815087 |              |                |          |                |
| Adjusted R Square     | 0.809804 |              |                |          |                |
| Standard Error        | 0.329586 |              |                |          |                |
| Observations          | 37       |              |                |          |                |
| ANOVA                 |          |              |                |          |                |
|                       | df       | SS           | MS             | F        | Significance F |
| Regression            | 1        | 16.75883     | 16.75883       | 154.2787 | 2.1902E-14     |
| Residual              | 35       | 3.801946     | 0.108627       |          |                |
| Total                 | 36       | 20.56078     |                |          |                |
|                       |          | Coefficients | Standard Error | t Stat   | P-value        |
| Intercept             |          | 1.133794     | 0.378769       | 2.993361 | 0.005035       |
| X Variable 1          |          | 0.299179     | 0.024087       | 12.4209  | 2.19E-14       |

QSAR Modeling – Molar Mass Capability Model, Final Model

**Table S11.** Molar mass capability ( $M_n$  and  $\Delta\Delta G^\ddagger_{T, \text{exp}}$ ), values for all 5 descriptors, and predicted

$\Delta\Delta G^\ddagger_{T, \text{QSAR}}$ .

|            | $M_n$<br>(kDa) | $\Delta\%V_{\text{Bur, Zr}}$ | $\%V_{\text{Bur, C4}}$ | $\%V_{\text{Bur, C5-6}}$ | $\%V_{\text{Bur, open}}$ | $\%V_{\text{Bur, C2-3-Front}}$ | $\Delta\Delta G^\ddagger_{T, \text{exp}}$<br>(kcal/mol) | $\Delta\Delta G^\ddagger_{T, \text{QSAR}}$<br>(kcal/mol) |
|------------|----------------|------------------------------|------------------------|--------------------------|--------------------------|--------------------------------|---------------------------------------------------------|----------------------------------------------------------|
| <b>M28</b> | 3              | 5.2                          | 7.8                    | 56.9                     | 40.1                     | 54.7                           | 2.89                                                    | 2.82                                                     |
| <b>M36</b> | 19             | 11.4                         | 19.0                   | 40.7                     | 34.3                     | 55.9                           | 4.05                                                    | 4.38                                                     |
| <b>M7</b>  | 80             | 15.4                         | 7.5                    | 39.2                     | 35.5                     | 45.9                           | 5.00                                                    | 5.30                                                     |
| <b>M18</b> | 90             | 15.3                         | 7.5                    | 39.1                     | 35.5                     | 45.8                           | 5.08                                                    | 5.29                                                     |
| <b>M1</b>  | 100            | 12.8                         | 4.0                    | 38.8                     | 34.6                     | 46.5                           | 5.15                                                    | 5.01                                                     |
| <b>M8</b>  | 100            | 15.0                         | 16.0                   | 41.7                     | 36.2                     | 45.9                           | 5.15                                                    | 5.39                                                     |
| <b>M22</b> | 130            | 13.1                         | 9.5                    | 40.1                     | 34.9                     | 46.6                           | 5.32                                                    | 5.15                                                     |
| <b>M6</b>  | 140            | 14.8                         | 7.5                    | 39.6                     | 34.7                     | 46.5                           | 5.37                                                    | 5.35                                                     |
| <b>M3</b>  | 140            | 13.3                         | 9.5                    | 40.1                     | 34.9                     | 46.6                           | 5.37                                                    | 5.17                                                     |
| <b>M17</b> | 140            | 14.8                         | 7.5                    | 39.6                     | 34.7                     | 46.5                           | 5.37                                                    | 5.35                                                     |
| <b>M5</b>  | 150            | 14.9                         | 6.9                    | 39.5                     | 34.6                     | 46.3                           | 5.41                                                    | 5.39                                                     |
| <b>M37</b> | 220            | 16.2                         | 18.5                   | 40.3                     | 34.8                     | 46.9                           | 5.67                                                    | 5.75                                                     |
| <b>M4</b>  | 230            | 15.3                         | 18.0                   | 40.4                     | 34.7                     | 46.4                           | 5.70                                                    | 5.70                                                     |
| <b>M10</b> | 230            | 16.1                         | 17.9                   | 40.2                     | 34.7                     | 46.6                           | 5.70                                                    | 5.77                                                     |
| <b>M11</b> | 250            | 16.1                         | 18.1                   | 40.1                     | 34.8                     | 46.6                           | 5.75                                                    | 5.75                                                     |
| <b>M15</b> | 290            | 16.3                         | 19.1                   | 40.1                     | 34.8                     | 46.5                           | 5.85                                                    | 5.81                                                     |
| <b>M12</b> | 290            | 16.3                         | 18.7                   | 40.1                     | 34.8                     | 46.6                           | 5.85                                                    | 5.79                                                     |
| <b>M31</b> | 290            | 14.9                         | 7.6                    | 57.4                     | 34.7                     | 47.0                           | 5.85                                                    | 6.02                                                     |
| <b>M9</b>  | 320            | 16.3                         | 18.4                   | 40.1                     | 34.8                     | 46.5                           | 5.92                                                    | 5.79                                                     |
| <b>M2</b>  | 320            | 16.2                         | 18.7                   | 40.1                     | 34.8                     | 46.4                           | 5.92                                                    | 5.80                                                     |
| <b>M23</b> | 380            | 16.3                         | 18.5                   | 46.8                     | 34.8                     | 46.5                           | 6.03                                                    | 6.06                                                     |
| <b>M29</b> | 400            | 16.2                         | 31.9                   | 38.7                     | 35.4                     | 46.5                           | 6.06                                                    | 5.90                                                     |
| <b>M16</b> | 410            | 16.8                         | 26.4                   | 41.5                     | 34.7                     | 47.0                           | 6.08                                                    | 6.07                                                     |
| <b>M19</b> | 470            | 17.6                         | 20.2                   | 41.7                     | 34.9                     | 46.8                           | 6.17                                                    | 6.01                                                     |
| <b>M26</b> | 480            | 16.3                         | 18.5                   | 55.0                     | 34.7                     | 46.5                           | 6.18                                                    | 6.40                                                     |
| <b>M27</b> | 490            | 16.0                         | 18.2                   | 58.4                     | 34.7                     | 52.9                           | 6.20                                                    | 5.86                                                     |
| <b>M35</b> | 510            | 17.9                         | 20.4                   | 48.6                     | 34.8                     | 46.8                           | 6.22                                                    | 6.35                                                     |
| <b>M14</b> | 530            | 16.8                         | 33.1                   | 40.2                     | 34.8                     | 46.6                           | 6.25                                                    | 6.19                                                     |
| <b>M20</b> | 610            | 17.65                        | 19.8                   | 46.4                     | 34.9                     | 46.5                           | 6.34                                                    | 6.22                                                     |
| <b>M32</b> | 620            | 15.2                         | 18.3                   | 58.3                     | 34.7                     | 47.4                           | 6.35                                                    | 6.30                                                     |
| <b>M24</b> | 630            | 16.2                         | 18.6                   | 54.7                     | 34.8                     | 47.4                           | 6.36                                                    | 6.27                                                     |
| <b>M25</b> | 710            | 16.2                         | 18.7                   | 58.0                     | 34.8                     | 47.3                           | 6.44                                                    | 6.41                                                     |
| <b>M38</b> | 800            | 18.2                         | 38.2                   | 42.1                     | 34.4                     | 47.2                           | 6.52                                                    | 6.59                                                     |
| <b>M34</b> | 990            | 17.7                         | 20.5                   | 59.8                     | 35.0                     | 47.3                           | 6.66                                                    | 6.67                                                     |
| <b>M33</b> | 950            | 16.7                         | 33.8                   | 58.1                     | 34.8                     | 47.2                           | 6.64                                                    | 6.84                                                     |
| <b>M30</b> | 1400           | 17.6                         | 22.3                   | 63.6                     | 34.8                     | 47.5                           | 6.89                                                    | 6.87                                                     |

**Table S12.** Molar Mass Capability Model Deviations.

|            | $ \Delta _{\text{exp-pred}}$<br>(kcal/mol) | $ \Delta ^2_{\text{exp-pred}}$ | $M_{n, \text{QSAR}}$<br>kDa | $ \Delta _{\text{exp-pred}}$ | $ \Delta ^2_{\text{exp-pred}}$ |
|------------|--------------------------------------------|--------------------------------|-----------------------------|------------------------------|--------------------------------|
| <b>M28</b> | 0.07                                       | 0.005                          | 3                           | 0                            | 0                              |
| <b>M36</b> | 0.33                                       | 0.112                          | 31                          | 12                           | 155                            |
| <b>M7</b>  | 0.30                                       | 0.088                          | 125                         | 45                           | 2031                           |
| <b>M18</b> | 0.21                                       | 0.045                          | 124                         | 34                           | 1143                           |
| <b>M1</b>  | 0.14                                       | 0.020                          | 81                          | 19                           | 371                            |
| <b>M8</b>  | 0.24                                       | 0.058                          | 143                         | 43                           | 1886                           |
| <b>M22</b> | 0.17                                       | 0.030                          | 100                         | 30                           | 906                            |
| <b>M6</b>  | 0.02                                       | 0.000                          | 136                         | 4                            | 16                             |
| <b>M3</b>  | 0.20                                       | 0.039                          | 104                         | 36                           | 1310                           |
| <b>M17</b> | 0.02                                       | 0.000                          | 136                         | 4                            | 16                             |
| <b>M5</b>  | 0.03                                       | 0.001                          | 144                         | 6                            | 39                             |
| <b>M37</b> | 0.08                                       | 0.007                          | 248                         | 28                           | 801                            |
| <b>M4</b>  | 0.00                                       | 0.000                          | 230                         | 0                            | 0                              |
| <b>M10</b> | 0.07                                       | 0.005                          | 256                         | 26                           | 696                            |
| <b>M11</b> | 0.00                                       | 0.000                          | 248                         | 2                            | 3                              |
| <b>M15</b> | 0.04                                       | 0.002                          | 271                         | 19                           | 352                            |
| <b>M12</b> | 0.06                                       | 0.004                          | 263                         | 27                           | 703                            |
| <b>M31</b> | 0.17                                       | 0.028                          | 372                         | 82                           | 6792                           |
| <b>M9</b>  | 0.12                                       | 0.015                          | 265                         | 55                           | 3061                           |
| <b>M2</b>  | 0.12                                       | 0.014                          | 266                         | 54                           | 2879                           |
| <b>M23</b> | 0.03                                       | 0.001                          | 396                         | 16                           | 250                            |
| <b>M29</b> | 0.16                                       | 0.025                          | 314                         | 86                           | 7424                           |
| <b>M16</b> | 0.01                                       | 0.000                          | 402                         | 8                            | 69                             |
| <b>M19</b> | 0.16                                       | 0.026                          | 368                         | 102                          | 10380                          |
| <b>M26</b> | 0.22                                       | 0.048                          | 667                         | 187                          | 34845                          |
| <b>M27</b> | 0.34                                       | 0.117                          | 292                         | 198                          | 39303                          |
| <b>M35</b> | 0.12                                       | 0.015                          | 612                         | 102                          | 10442                          |
| <b>M14</b> | 0.06                                       | 0.004                          | 483                         | 47                           | 2236                           |
| <b>M20</b> | 0.12                                       | 0.015                          | 507                         | 103                          | 10569                          |
| <b>M32</b> | 0.05                                       | 0.003                          | 570                         | 50                           | 2523                           |
| <b>M24</b> | 0.09                                       | 0.009                          | 545                         | 85                           | 7256                           |
| <b>M25</b> | 0.03                                       | 0.001                          | 675                         | 35                           | 1191                           |
| <b>M38</b> | 0.07                                       | 0.004                          | 882                         | 82                           | 6770                           |
| <b>M34</b> | 0.01                                       | 0.000                          | 1000                        | 10                           | 96                             |
| <b>M33</b> | 0.20                                       | 0.041                          | 1287                        | 337                          | 113801                         |
| <b>M30</b> | 0.02                                       | 0.000                          | 1358                        | 42                           | 1761                           |

**Table S13.** Mean average deviation (MAD), mean squared error (MSE) and root mean squared error (RMSE) for  $\Delta\Delta G^{\ddagger}_{T, \text{QSAR}}$  and  $M_{n, \text{QSAR}}$ .

| $\Delta\Delta G^{\ddagger}_{T, \text{QSAR}}$ |                                          | $M_{n, \text{QSAR}}$ |                       |
|----------------------------------------------|------------------------------------------|----------------------|-----------------------|
| MAD                                          | 0.11 kcal/mol                            | MAD                  | 56 kDa                |
| MSE                                          | 0.02 kcal <sup>2</sup> /mol <sup>2</sup> | MSE                  | 8179 kDa <sup>2</sup> |
| RMSE                                         | 0.15 kcal/mol                            | RMSE                 | 90 kDa                |

### QSAR Modeling – Molar Mass Capability Model, Analysis of Variance

| SUMMARY OUTPUT               |           |                       |               |                |                       |                  |                    |                    |
|------------------------------|-----------|-----------------------|---------------|----------------|-----------------------|------------------|--------------------|--------------------|
| <i>Regression Statistics</i> |           |                       |               |                |                       |                  |                    |                    |
| Multiple R                   | 0.98034   |                       |               |                |                       |                  |                    |                    |
| R Square                     | 0.961066  |                       |               |                |                       |                  |                    |                    |
| Adjusted R                   | 0.954577  |                       |               |                |                       |                  |                    |                    |
| Standard Error               | 0.161448  |                       |               |                |                       |                  |                    |                    |
| Observations                 | 36        |                       |               |                |                       |                  |                    |                    |
| ANOVA                        |           |                       |               |                |                       |                  |                    |                    |
|                              | <i>df</i> | <i>SS</i>             | <i>MS</i>     | <i>F</i>       | <i>Significance F</i> |                  |                    |                    |
| Regression                   | 5         | 19.30234201           | 3.860468403   | 148.1065586    | 3.33615E-20           |                  |                    |                    |
| Residual                     | 30        | 0.781964372           | 0.026065479   |                |                       |                  |                    |                    |
| Total                        | 35        | 20.08430638           |               |                |                       |                  |                    |                    |
| <i>Coefficients</i>          |           | <i>Standard Error</i> | <i>t Stat</i> | <i>P-value</i> | <i>Lower 95%</i>      | <i>Upper 95%</i> | <i>Lower 95.0%</i> | <i>Upper 95.0%</i> |
| Intercept                    | 13.97101  | 2.373299691           | 5.88674517    | 1.91429E-06    | 9.124085902           | 18.81794         | 9.124086           | 18.81794           |
| X Variable                   | 0.127257  | 0.028983763           | 4.390623626   | 0.000129274    | 0.068064055           | 0.18645          | 0.068064           | 0.18645            |
| X Variable                   | 0.02314   | 0.004834894           | 4.786113139   | 4.25936E-05    | 0.013266178           | 0.033015         | 0.013266           | 0.033015           |
| X Variable                   | 0.039415  | 0.003938418           | 10.0077167    | 4.49378E-11    | 0.031371252           | 0.047458         | 0.031371           | 0.047458           |
| X Variable                   | -0.21952  | 0.046156553           | -4.756010549  | 4.63634E-05    | -0.313785309          | -0.12526         | -0.31379           | -0.12526           |
| X Variable                   | -0.09937  | 0.019726592           | -5.037355638  | 2.09645E-05    | -0.139656935          | -0.05908         | -0.13966           | -0.05908           |



MEAN = mean experimental value; MAD = mean average deviation; MSE = mean squared error; RMSE = root mean squared error;  $q^2$  = cross-validated  $R^2$

|    | Catalyst | Yintercept | slopeA   | slopeB   | slopeC   | slopeD   | slopeE   | predictedEXP | actualEXP | R <sup>2</sup> | adj. R <sup>2</sup> | Δ     | Δ <sup>2</sup> | (actualEXP-MEAN) <sup>2</sup> |
|----|----------|------------|----------|----------|----------|----------|----------|--------------|-----------|----------------|---------------------|-------|----------------|-------------------------------|
| 1  | M28      | 18.30555   | 0.144665 | 0.021307 | 0.03796  | -0.34122 | -0.10514 | 1.95         | 2.89      | 0.94           | 0.93                | 0.938 | 0.879          | 8.314                         |
| 2  | M36      | 15.5847    | 0.103846 | 0.025356 | 0.032864 | -0.34385 | -0.02765 | 5.25         | 4.05      | 0.98           | 0.97                | 1.202 | 1.444          | 2.974                         |
| 3  | M7       | 12.90711   | 0.141316 | 0.020277 | 0.037971 | -0.19639 | -0.09594 | 5.35         | 5.00      | 0.97           | 0.96                | 0.350 | 0.123          | 0.597                         |
| 4  | M18      | 13.30312   | 0.136064 | 0.021248 | 0.038456 | -0.20424 | -0.09767 | 5.32         | 5.08      | 0.96           | 0.96                | 0.248 | 0.061          | 0.483                         |
| 5  | M1       | 13.0943    | 0.136763 | 0.023194 | 0.039201 | -0.20462 | -0.09491 | 4.97         | 5.15      | 0.96           | 0.95                | 0.180 | 0.032          | 0.391                         |
| 6  | M8       | 13.29046   | 0.131849 | 0.022913 | 0.038695 | -0.19776 | -0.10165 | 5.42         | 5.15      | 0.96           | 0.96                | 0.278 | 0.077          | 0.391                         |
| 7  | M22      | 13.08084   | 0.138198 | 0.022601 | 0.039163 | -0.20609 | -0.09376 | 5.11         | 5.32      | 0.96           | 0.96                | 0.205 | 0.042          | 0.204                         |
| 8  | M6       | 13.95714   | 0.127238 | 0.023234 | 0.039448 | -0.21922 | -0.09937 | 5.35         | 5.37      | 0.96           | 0.95                | 0.020 | 0.000          | 0.162                         |
| 9  | M3       | 13.0898    | 0.137935 | 0.02271  | 0.039216 | -0.20624 | -0.09386 | 5.14         | 5.37      | 0.96           | 0.96                | 0.228 | 0.052          | 0.162                         |
| 10 | M17      | 13.95714   | 0.127238 | 0.023234 | 0.039448 | -0.21922 | -0.09937 | 5.35         | 5.37      | 0.96           | 0.95                | 0.020 | 0.000          | 0.162                         |
| 11 | M5       | 13.94287   | 0.127261 | 0.023289 | 0.03946  | -0.21892 | -0.09934 | 5.38         | 5.41      | 0.96           | 0.95                | 0.030 | 0.001          | 0.127                         |
| 12 | M37      | 13.89691   | 0.12847  | 0.023058 | 0.039137 | -0.21835 | -0.09872 | 5.75         | 5.67      | 0.96           | 0.95                | 0.085 | 0.007          | 0.011                         |
| 13 | M4       | 13.97427   | 0.127219 | 0.023145 | 0.039413 | -0.21957 | -0.09939 | 5.70         | 5.70      | 0.96           | 0.95                | 0.002 | 0.000          | 0.005                         |
| 14 | M10      | 13.96832   | 0.127645 | 0.023118 | 0.039219 | -0.21947 | -0.09923 | 5.77         | 5.70      | 0.96           | 0.95                | 0.076 | 0.006          | 0.005                         |
| 15 | M11      | 13.97233   | 0.127229 | 0.023142 | 0.039424 | -0.21955 | -0.09938 | 5.75         | 5.75      | 0.96           | 0.95                | 0.003 | 0.000          | 0.000                         |
| 16 | M15      | 13.99365   | 0.126838 | 0.023143 | 0.039547 | -0.22005 | -0.09948 | 5.81         | 5.85      | 0.96           | 0.95                | 0.045 | 0.002          | 0.006                         |
| 17 | M12      | 14.01776   | 0.126452 | 0.02318  | 0.039618 | -0.22043 | -0.09967 | 5.79         | 5.85      | 0.96           | 0.95                | 0.065 | 0.004          | 0.006                         |
| 18 | M31      | 14.48356   | 0.123141 | 0.022356 | 0.041074 | -0.2297  | -0.10251 | 6.06         | 5.85      | 0.96           | 0.96                | 0.206 | 0.043          | 0.006                         |
| 19 | M9       | 14.05715   | 0.125709 | 0.023231 | 0.039808 | -0.2213  | -0.09985 | 5.79         | 5.92      | 0.96           | 0.96                | 0.131 | 0.017          | 0.021                         |
| 20 | M2       | 14.00041   | 0.126507 | 0.023124 | 0.039375 | -0.22054 | -0.09938 | 5.79         | 5.92      | 0.96           | 0.96                | 0.126 | 0.016          | 0.021                         |
| 21 | M23      | 13.98111   | 0.127245 | 0.023146 | 0.039443 | -0.2196  | -0.09953 | 6.06         | 6.03      | 0.96           | 0.95                | 0.029 | 0.001          | 0.067                         |
| 22 | M29      | 13.93867   | 0.13069  | 0.021167 | 0.040113 | -0.22417 | -0.09643 | 5.86         | 6.06      | 0.96           | 0.96                | 0.200 | 0.040          | 0.086                         |
| 23 | M16      | 13.97181   | 0.127253 | 0.023085 | 0.039448 | -0.21955 | -0.09938 | 6.07         | 6.08      | 0.96           | 0.95                | 0.013 | 0.000          | 0.095                         |
| 24 | M19      | 14.67147   | 0.117612 | 0.023971 | 0.040296 | -0.23097 | -0.1038  | 5.99         | 6.17      | 0.96           | 0.96                | 0.183 | 0.034          | 0.159                         |
| 25 | M26      | 14.43642   | 0.122772 | 0.023496 | 0.040891 | -0.22692 | -0.10367 | 6.43         | 6.18      | 0              |                     |       |                |                               |

## QSAR Modeling – Regioselectivity, Final Model

**Table S15.** Regioselectivity ( $regio_{tot}$  and  $\Delta\Delta G^{\ddagger}_{regiotot, exp}$ ), values for all 5 descriptors, and predicted

$\Delta\Delta G^{\ddagger}_{regiotot, QSAR}$ .

|            | $regio_{tot}$ | $e^-ZrCl_2$ , NPA | % $V_{Bur}$ , C2-3-All | % $V_{Bur}$ , C4 | % $V_{Bur}$ , C5-6 | % $V_{Bur}$ , open | $\Delta\Delta G^{\ddagger}_{regiotot, exp}$ | $\Delta\Delta G^{\ddagger}_{regiotot, QSAR}$ |
|------------|---------------|-------------------|------------------------|------------------|--------------------|--------------------|---------------------------------------------|----------------------------------------------|
| <b>M36</b> | 0.09          | 0.43049           | 141.0                  | 19.0             | 40.7               | 34.3               | 4.67                                        | 4.70                                         |
| <b>M7</b>  | 0.67          | 0.38406           | 118.1                  | 7.5              | 39.2               | 35.5               | 3.33                                        | 3.44                                         |
| <b>M18</b> | 0.66          | 0.38582           | 118.1                  | 7.5              | 39.1               | 35.5               | 3.34                                        | 3.42                                         |
| <b>M1</b>  | 0.29          | 0.39032           | 117.8                  | 4.0              | 38.8               | 34.6               | 3.89                                        | 3.71                                         |
| <b>M8</b>  | 0.74          | 0.39090           | 118.1                  | 16.0             | 41.7               | 36.2               | 3.26                                        | 3.16                                         |
| <b>M22</b> | 0.90          | 0.41691           | 118.0                  | 9.5              | 40.1               | 34.9               | 3.13                                        | 3.32                                         |
| <b>M6</b>  | 0.82          | 0.42025           | 117.7                  | 7.5              | 39.6               | 34.7               | 3.19                                        | 3.32                                         |
| <b>M3</b>  | 0.91          | 0.41500           | 118.1                  | 9.5              | 40.1               | 34.9               | 3.12                                        | 3.35                                         |
| <b>M17</b> | 0.79          | 0.42209           | 117.8                  | 7.5              | 39.6               | 34.7               | 3.22                                        | 3.29                                         |
| <b>M5</b>  | 0.53          | 0.41368           | 117.8                  | 6.9              | 39.5               | 34.6               | 3.49                                        | 3.45                                         |
| <b>M37</b> | 0.21          | 0.42189           | 127.1                  | 18.5             | 40.3               | 34.8               | 4.11                                        | 3.96                                         |
| <b>M4</b>  | 0.50          | 0.41789           | 118.1                  | 18.0             | 40.4               | 34.7               | 3.53                                        | 3.67                                         |
| <b>M10</b> | 0.40          | 0.4117            | 117.8                  | 17.9             | 40.2               | 34.7               | 3.67                                        | 3.75                                         |
| <b>M11</b> | 0.30          | 0.41192           | 117.8                  | 18.1             | 40.1               | 34.8               | 3.87                                        | 3.70                                         |
| <b>M15</b> | 0.42          | 0.41390           | 118.1                  | 19.1             | 40.1               | 34.8               | 3.64                                        | 3.72                                         |
| <b>M12</b> | 0.32          | 0.41332           | 117.8                  | 18.7             | 40.1               | 34.8               | 3.82                                        | 3.70                                         |
| <b>M31</b> | 1.41          | 0.41091           | 117.7                  | 7.6              | 57.4               | 34.7               | 2.83                                        | 2.90                                         |
| <b>M9</b>  | 0.29          | 0.41178           | 117.8                  | 18.4             | 40.1               | 34.8               | 3.89                                        | 3.71                                         |
| <b>M2</b>  | 0.32          | 0.41191           | 118.1                  | 18.7             | 40.1               | 34.8               | 3.82                                        | 3.73                                         |
| <b>M23</b> | 0.28          | 0.40469           | 118.0                  | 18.5             | 46.8               | 34.8               | 3.91                                        | 3.62                                         |
| <b>M29</b> | 0.23          | 0.39728           | 120.2                  | 31.9             | 38.7               | 35.4               | 4.04                                        | 4.17                                         |
| <b>M16</b> | 0.18          | 0.41509           | 118.0                  | 26.4             | 41.5               | 34.7               | 4.21                                        | 3.94                                         |
| <b>M19</b> | 0.42          | 0.41418           | 118.4                  | 20.2             | 41.7               | 34.9               | 3.64                                        | 3.66                                         |
| <b>M26</b> | 0.43          | 0.41180           | 117.9                  | 18.5             | 55.0               | 34.7               | 3.63                                        | 3.32                                         |
| <b>M27</b> | 0.98          | 0.40457           | 117.8                  | 18.2             | 58.4               | 34.7               | 3.07                                        | 3.30                                         |
| <b>M35</b> | 0.36          | 0.41800           | 118.2                  | 20.4             | 48.6               | 34.8               | 3.75                                        | 3.44                                         |
| <b>M14</b> | 0.17          | 0.40819           | 119.2                  | 33.1             | 40.2               | 34.8               | 4.25                                        | 4.28                                         |
| <b>M20</b> | 0.48          | 0.39857           | 117.8                  | 19.8             | 46.4               | 34.9               | 3.55                                        | 3.70                                         |
| <b>M32</b> | 1.05          | 0.40988           | 118.0                  | 18.3             | 58.3               | 34.7               | 3.03                                        | 3.24                                         |
| <b>M24</b> | 0.54          | 0.40385           | 118.0                  | 18.6             | 54.7               | 34.8               | 3.47                                        | 3.39                                         |
| <b>M25</b> | 0.69          | 0.40338           | 118.0                  | 18.7             | 58.0               | 34.8               | 3.31                                        | 3.30                                         |
| <b>M38</b> | 0.20          | 0.41882           | 118.6                  | 38.2             | 42.1               | 34.4               | 4.14                                        | 4.42                                         |
| <b>M34</b> | 0.83          | 0.40482           | 118.3                  | 20.5             | 59.8               | 35.0               | 3.19                                        | 3.19                                         |
| <b>M33</b> | 0.30          | 0.39839           | 119.2                  | 33.8             | 58.1               | 34.8               | 3.87                                        | 3.89                                         |
| <b>M30</b> | 0.71          | 0.39993           | 117.9                  | 22.3             | 63.6               | 34.8               | 3.29                                        | 3.29                                         |

**Table S16.** Regioselectivity Model Deviations.

|     | $ \Delta _{\text{exp-pred}}$<br>(kcal/mol) | $ \Delta ^2_{\text{exp-pred}}$ | <i>regio</i> <sub>tot, QSAR</sub><br>(mol%) | $ \Delta _{\text{exp-pred}}$ | $ \Delta ^2_{\text{exp-pred}}$ |
|-----|--------------------------------------------|--------------------------------|---------------------------------------------|------------------------------|--------------------------------|
| M36 | 0.03                                       | 0.0011                         | 0.082133                                    | 0.007867                     | 0.00                           |
| M7  | 0.11                                       | 0.0119                         | 0.555021                                    | 0.114979                     | 0.01                           |
| M18 | 0.08                                       | 0.0059                         | 0.573802                                    | 0.086198                     | 0.01                           |
| M1  | 0.17                                       | 0.0305                         | 0.365528                                    | 0.075528                     | 0.01                           |
| M8  | 0.10                                       | 0.0105                         | 0.84522                                     | 0.10522                      | 0.01                           |
| M22 | 0.19                                       | 0.0348                         | 0.666005                                    | 0.233995                     | 0.05                           |
| M6  | 0.12                                       | 0.0149                         | 0.667992                                    | 0.152008                     | 0.02                           |
| M3  | 0.23                                       | 0.0508                         | 0.635034                                    | 0.274966                     | 0.08                           |
| M17 | 0.07                                       | 0.0056                         | 0.690542                                    | 0.099458                     | 0.01                           |
| M5  | 0.04                                       | 0.0013                         | 0.544618                                    | 0.014618                     | 0.00                           |
| M37 | 0.14                                       | 0.0198                         | 0.250798                                    | 0.040798                     | 0.00                           |
| M4  | 0.15                                       | 0.0212                         | 0.390627                                    | 0.109373                     | 0.01                           |
| M10 | 0.07                                       | 0.0056                         | 0.346935                                    | 0.053065                     | 0.00                           |
| M11 | 0.16                                       | 0.0269                         | 0.372281                                    | 0.072281                     | 0.01                           |
| M15 | 0.08                                       | 0.0059                         | 0.363442                                    | 0.056558                     | 0.00                           |
| M12 | 0.12                                       | 0.0149                         | 0.37294                                     | 0.05294                      | 0.00                           |
| M31 | 0.08                                       | 0.0056                         | 1.244498                                    | 0.165502                     | 0.03                           |
| M9  | 0.18                                       | 0.0308                         | 0.365925                                    | 0.075925                     | 0.01                           |
| M2  | 0.09                                       | 0.0080                         | 0.35484                                     | 0.03484                      | 0.00                           |
| M23 | 0.29                                       | 0.0855                         | 0.421465                                    | 0.141465                     | 0.02                           |
| M29 | 0.13                                       | 0.0164                         | 0.18312                                     | 0.04688                      | 0.00                           |
| M16 | 0.27                                       | 0.0740                         | 0.261751                                    | 0.081751                     | 0.01                           |
| M19 | 0.02                                       | 0.0003                         | 0.397246                                    | 0.022754                     | 0.00                           |
| M26 | 0.31                                       | 0.0968                         | 0.668532                                    | 0.238532                     | 0.06                           |
| M27 | 0.23                                       | 0.0511                         | 0.684113                                    | 0.295887                     | 0.09                           |
| M35 | 0.30                                       | 0.0910                         | 0.550868                                    | 0.190868                     | 0.04                           |
| M14 | 0.04                                       | 0.0014                         | 0.155005                                    | 0.014995                     | 0.00                           |
| M20 | 0.15                                       | 0.0216                         | 0.374086                                    | 0.105914                     | 0.01                           |
| M32 | 0.21                                       | 0.0447                         | 0.750147                                    | 0.299853                     | 0.09                           |
| M24 | 0.08                                       | 0.0066                         | 0.594957                                    | 0.054957                     | 0.00                           |
| M25 | 0.01                                       | 0.0001                         | 0.683466                                    | 0.006534                     | 0.00                           |
| M38 | 0.28                                       | 0.0788                         | 0.126304                                    | 0.073696                     | 0.01                           |
| M34 | 0.00                                       | 0.0000                         | 0.810113                                    | 0.019887                     | 0.00                           |
| M33 | 0.03                                       | 0.0007                         | 0.279221                                    | 0.020779                     | 0.00                           |
| M30 | 0.00                                       | 0.0000                         | 0.698842                                    | 0.011158                     | 0.00                           |

**Table S17.** Mean average deviation (MAD), mean squared error (MSE) and root mean squared error (RMSE) for  $\Delta\Delta G^{\ddagger}_{\text{regiotot, QSAR}}$  and  $\text{regio}_{\text{tot}}$ .

| $\Delta\Delta G^{\ddagger}_{\text{regiotot, QSAR}}$ |                             | $\text{regio}_{\text{tot, QSAR}}$ |                        |
|-----------------------------------------------------|-----------------------------|-----------------------------------|------------------------|
| MAD                                                 | 0.13 kcal/mol               | MAD                               | 0.10 mol%              |
| MSE                                                 | 0.02 kcal <sup>2</sup> /mol | MSE                               | 0.02 mol% <sup>2</sup> |
| RMSE                                                | 0.16 kcal/mol               | RMSE                              | 0.13 mol%              |

## QSAR Modeling – Regioselectivity Model, Analysis of Variance

|                              |                     |                       |               |                |                       |                  |                    |                    |
|------------------------------|---------------------|-----------------------|---------------|----------------|-----------------------|------------------|--------------------|--------------------|
| SUMMARY OUTPUT               |                     |                       |               |                |                       |                  |                    |                    |
| <i>Regression Statistics</i> |                     |                       |               |                |                       |                  |                    |                    |
| Multiple R                   | 0.921653            |                       |               |                |                       |                  |                    |                    |
| R Square                     | 0.849445            |                       |               |                |                       |                  |                    |                    |
| Adjusted R                   | 0.823487            |                       |               |                |                       |                  |                    |                    |
| Standard Error               | 0.173701            |                       |               |                |                       |                  |                    |                    |
| Observations                 | 35                  |                       |               |                |                       |                  |                    |                    |
| <i>ANOVA</i>                 |                     |                       |               |                |                       |                  |                    |                    |
|                              | <i>df</i>           | <i>SS</i>             | <i>MS</i>     | <i>F</i>       | <i>Significance F</i> |                  |                    |                    |
| Regression                   | 5                   | 4.936750878           | 0.987350176   | 32.72401827    | 4.46554E-11           |                  |                    |                    |
| Residual                     | 29                  | 0.874988972           | 0.030172034   |                |                       |                  |                    |                    |
| Total                        | 34                  | 5.81173985            |               |                |                       |                  |                    |                    |
| <i>Coefficients</i>          |                     |                       |               |                |                       |                  |                    |                    |
|                              | <i>Coefficients</i> | <i>Standard Error</i> | <i>t Stat</i> | <i>P-value</i> | <i>Lower 95%</i>      | <i>Upper 95%</i> | <i>Lower 95.0%</i> | <i>Upper 95.0%</i> |
| Intercept                    | 23.61944            | 5.839914409           | 4.044484535   | 0.000354496    | 11.67547746           | 35.56341         | 11.67548           | 35.56341           |
| X Variable                   | -14.2674            | 4.227817528           | -3.374654199  | 0.002115558    | -22.9142799           | -5.62056         | -22.9143           | -5.62056           |
| X Variable                   | 0.042727            | 0.007873359           | 5.426801508   | 7.75044E-06    | 0.02662433            | 0.05883          | 0.026624           | 0.05883            |
| X Variable                   | 0.031339            | 0.003820138           | 8.203598781   | 4.79959E-09    | 0.023525818           | 0.039152         | 0.023526           | 0.039152           |
| X Variable                   | -0.0308             | 0.004153022           | -7.417043301  | 3.57773E-08    | -0.039297028          | -0.02231         | -0.0393            | -0.02231           |
| X Variable                   | -0.52888            | 0.127285206           | -4.155060371  | 0.000262187    | -0.789205189          | -0.26855         | -0.78921           | -0.26855           |

**Table S18.** LOOCV analysis molar mass capability model.

S85

QSAR Modeling – Screened Catalyst Candidates and Predicted Performance

**Table S19.** Predicted performance for selected catalysts, including **M39-M43**.

| Cat                                                | $\Delta\%V_{\text{Bur,Zr}}$ | $\%V_{\text{Bur,C2-3}}$ | $\%V_{\text{Bur,C2-3-Front}}$ | $\%V_{\text{Bur,C5-6}}$ | $\%V_{\text{Bur,C4}}$ | $\%V_{\text{Bur,open}}$ | $e^-_{\text{ZrCl}_2, \text{NPA}}$ | $\Delta\Delta G^\ddagger_{\text{enantio}}$ | $\Delta\Delta G^\ddagger_{\text{regiotot}}$ | $\Delta\Delta G^\ddagger_{\text{T}}$ | $\sigma$ | $regio_{\text{tot}}$ | $M_n$ |
|----------------------------------------------------|-----------------------------|-------------------------|-------------------------------|-------------------------|-----------------------|-------------------------|-----------------------------------|--------------------------------------------|---------------------------------------------|--------------------------------------|----------|----------------------|-------|
| 2-cyPr-4-(3,5-tBu)Ph-6-Me                          | 10.9                        | 140.2                   | 57.2                          | 40.1                    | 34.8                  | 34.5                    | 0.41105                           | 1.79                                       | 5.04                                        | 4.76                                 | 0.9330   | 0.05                 | 56    |
| 2-Et-4-(3,5-tBu)Ph-6-nPent                         | 16.5                        | 127.8                   | 46.9                          | 47.0                    | 36.5                  | 35.0                    | 0.41033                           | 4.68                                       | 4.16                                        | 6.61                                 | 0.9992   | 0.19                 | 910   |
| 2-iPr-4-(3,5-tBu)Ph-6-Me                           | 11.0                        | 141.9                   | 55.8                          | 51.7                    | 36.3                  | 34.4                    | 0.41605                           | 1.84                                       | 5.12                                        | 4.99                                 | 0.9380   | 0.04                 | 79    |
| 2-Me-4-(5-Me)thienyl                               | 17.5                        | 119.1                   | 46.6                          | 47.6                    | 23.4                  | 34.6                    | 0.42381                           | 5.20                                       | 3.72                                        | 6.15                                 | 0.9996   | 0.37                 | 452   |
| 2-Me-4-C <sub>5</sub> F <sub>6</sub> -6-Ad         | 16.5                        | 118.0                   | 47.8                          | 41.4                    | 26.7                  | 34.9                    | 0.40424                           | 4.68                                       | 3.26                                        | 6.72                                 | 0.9992   | 0.73                 | 1071  |
| 2-Me-4-C <sub>5</sub> F <sub>6</sub> -5-iPr        | 17.8                        | 117.8                   | 47.3                          | 61.9                    | 29.1                  | 34.8                    | 0.40627                           | 5.36                                       | 3.52                                        | 6.77                                 | 0.9997   | 0.49                 | 1159  |
| 2-Me-4-(3,5-CF <sub>3</sub> )Ph                    | 16.3                        | 118.1                   | 46.4                          | 55.8                    | 26.8                  | 34.7                    | 0.41463                           | 4.58                                       | 3.89                                        | 6.03                                 | 0.9990   | 0.28                 | 377   |
| 2-Me-4-(2-Me-5-tBu)Ph                              | 18.7                        | 118.3                   | 46.8                          | 40.3                    | 42.2                  | 35.2                    | 0.40628                           | 5.82                                       | 4.19                                        | 6.61                                 | 0.9998   | 0.18                 | 915   |
| 2-Me-4-(3,5-tBu)Ph-6-TriPhSi                       | 15.9                        | 118.7                   | 52.6                          | 42.2                    | 33.9                  | 34.9                    | 0.39705                           | 4.37                                       | 3.52                                        | 6.47                                 | 0.9986   | 0.49                 | 740   |
| 2-Me-4-(3,5-TMS)Ph-6-tBu                           | 16.5                        | 119.2                   | 47.1                          | 65.5                    | 39.4                  | 34.8                    | 0.39927                           | 4.68                                       | 3.95                                        | 6.96                                 | 0.9992   | 0.26                 | 1539  |
| 2-Me-4-C <sub>5</sub> F <sub>6</sub> -6-tBu        | 16.8                        | 118.2                   | 47.5                          | 58.2                    | 26.5                  | 34.7                    | 0.40343                           | 4.84                                       | 3.45                                        | 6.73                                 | 0.9993   | 0.54                 | 1092  |
| 2-Me-4-C <sub>5</sub> F <sub>6</sub> -6-TMS        | 16.9                        | 118.1                   | 47.2                          | 59.5                    | 26.5                  | 34.7                    | 0.41181                           | 4.89                                       | 3.29                                        | 6.82                                 | 0.9994   | 0.69                 | 1243  |
| 2-Me-4-C <sub>5</sub> F <sub>6</sub> -6-TriPhSi    | 17.1                        | 118.2                   | 50.5                          | 60.6                    | 26.5                  | 34.8                    | 0.40494                           | 4.99                                       | 3.12                                        | 6.74                                 | 0.9995   | 0.90                 | 1108  |
| 2-Me-4-(2-tBu)Ph                                   | 16.9                        | 118.1                   | 47.0                          | 66.9                    | 17.3                  | 38.4                    | 0.41145                           | 4.89                                       | 1.54                                        | 5.18                                 | 0.9994   | 9.71                 | 105   |
| 2-Me-4-(4-pyridyl)                                 | 16.0                        | 117.8                   | 46.6                          | 44.6                    | 18.1                  | 34.7                    | 0.41491                           | 4.43                                       | 3.61                                        | 5.76                                 | 0.9988   | 0.43                 | 252   |
| 2-Me-4-(4-pyridyl)/AlMe <sub>3</sub> -adduct       | 16.2                        | 118.0                   | 46.5                          | 40.1                    | 18.4                  | 34.6                    | 0.41651                           | 4.53                                       | 3.65                                        | 5.85                                 | 0.9989   | 0.40                 | 289   |
| 2-Me-4-(4-pyridyl)-6-TMS/AlMe <sub>3</sub> -adduct | 16.1                        | 118.0                   | 46.8                          | 40.8                    | 18.5                  | 34.7                    | 0.41440                           | 4.48                                       | 3.05                                        | 6.48                                 | 0.9988   | 1.00                 | 746   |
| 2-Me-4-Ph-5-iPr                                    | 17.4                        | 117.7                   | 46.6                          | 58.3                    | 19.5                  | 35.5                    | 0.41440                           | 5.15                                       | 2.75                                        | 6.40                                 | 0.9996   | 1.57                 | 664   |
| 2-Me-4-Ph-5-tBu                                    | 14.8                        | 117.7                   | 46.5                          | 55.5                    | 24.5                  | 39.6                    | 0.39069                           | 3.81                                       | 1.04                                        | 5.33                                 | 0.9968   | 20.75                | 132   |
| 2-Me-4-Ph-6-CF <sub>3</sub>                        | 16.3                        | 118.0                   | 47.3                          | 56.4                    | 18.3                  | 34.6                    | 0.42791                           | 4.58                                       | 3.11                                        | 6.22                                 | 0.9990   | 0.91                 | 505   |
| 2-Me-4-Ph-6-CN/AlMe <sub>3</sub> -adduct           | 16.0                        | 117.9                   | 46.9                          | 51.9                    | 18.2                  | 34.3                    | 0.44166                           | 4.43                                       | 3.14                                        | 6.17                                 | 0.9988   | 0.87                 | 471   |
| 2-Me-4-(5-pyrimidyl)                               | 16.3                        | 117.9                   | 46.4                          | 49.1                    | 18.9                  | 34.8                    | 0.41055                           | 4.58                                       | 3.64                                        | 5.80                                 | 0.9990   | 0.41                 | 269   |
| 2-nPent-4-(3,5-tBu)Ph-6-Me                         | 16.7                        | 147.5                   | 47.3                          | 39.8                    | 39.5                  | 35.4                    | 0.42403                           | 4.79                                       | 4.82                                        | 6.40                                 | 0.9993   | 0.07                 | 667   |
| 2-Me-4-(3,5-Ad)Ph                                  | 16.3                        | 118.6                   | 46.7                          | 47.3                    | 35.2                  | 34.9                    | 0.40860                           | 4.58                                       | 4.16                                        | 6.13                                 | 0.9990   | 0.19                 | 444   |
| 2-Et-4-(2-Me)Ph                                    | 17.6                        | 127.5                   | 47.1                          | 40.0                    | 20.3                  | 34.9                    | 0.42349                           | 5.25                                       | 3.80                                        | 5.99                                 | 0.9996   | 0.32                 | 357   |
| 2-iPr-4-(3,5-tBu)Ph-6-tBu                          | 11.1                        | 141.8                   | 56.5                          | 41.9                    | 37.2                  | 34.3                    | 0.41715                           | 1.89                                       | 4.85                                        | 5.41                                 | 0.9427   | 0.07                 | 148   |
| 2-Me-4-(3,5-tBu)Ph-6-Me-7-NMe <sub>2</sub>         | 15.4                        | 119.5                   | 46.6                          | 58.5                    | 36.2                  | 36.5                    | 0.41543                           | 4.12                                       | 2.90                                        | 6.25                                 | 0.9980   | 1.26                 | 529   |
| 2-Me-4-Ph-5-Et                                     | 17.5                        | 117.7                   | 46.6                          | 53.9                    | 27.9                  | 35.9                    | 0.39291                           | 5.20                                       | 3.32                                        | 6.25                                 | 0.9996   | 0.66                 | 527   |
| 2-Me-4-Ph-5-Cl-6tBu                                | 17.7                        | 117.7                   | 47.2                          | 48.6                    | 19.6                  | 35.1                    | 0.40337                           | 5.30                                       | 2.94                                        | 6.78                                 | 0.9997   | 1.18                 | 1172  |
| 2-Et-4-(3,5-tBu)Ph-6-Me ( <b>M39</b> )             | 16.8                        | 119.6                   | 46.3                          | 63.3                    | 33.5                  | 34.8                    | 0.40132                           | 4.84                                       | 4.21                                        | 6.49                                 | 0.9993   | 0.14                 | 758   |
| 2-Et-4-(3,5-tBu)Ph-6-Me ( <b>M40</b> )             | 16.8                        | 128.6                   | 46.8                          | 40.1                    | 33.7                  | 35.0                    | 0.40985                           | 4.84                                       | 4.36                                        | 6.41                                 | 0.9993   | 0.17                 | 675   |
| 2-Me-4-Ph-5-OMe ( <b>M41</b> )                     | 16.9                        | 117.9                   | 46.7                          | 47.5                    | 19.3                  | 34.6                    | 0.41167                           | 4.76                                       | 3.63                                        | 6.20                                 | 0.9992   | 0.42                 | 494   |
| 2-Me-4-(3,5-TMS)Ph ( <b>M42</b> )                  | 16.9                        | 119.2                   | 46.6                          | 39.9                    | 37.1                  | 35.0                    | 0.40703                           | 4.76                                       | 4.33                                        | 6.24                                 | 0.9992   | 0.14                 | 520   |
| 2-Me-4-[3,5-(1-Ad)-4-OMe]Ph_A ( <b>M43</b> )       | 18.4                        | 119.3                   | 46.6                          | 39.8                    | 51.5                  | 35.1                    | 0.40473                           | 5.47                                       | 4.77                                        | 6.74                                 | 0.9997   | 0.07                 | 1104  |
| 2-Me-4-[3,5-(1-Ad)-4-OMe]Ph_B ( <b>M43</b> )       | 16.1                        | 118.3                   | 46.5                          | 41.0                    | 35.5                  | 34.8                    | 0.40642                           | 4.38                                       | 4.32                                        | 6.20                                 | 0.9987   | 0.15                 | 489   |

Abbreviations: cyPr cyclopropyl, nPent neopentyl, 1-Ad 1-adamantly, TriPhSi triphenylsilyl, TMS trimethylsilyl

**Table S20.** Estimated synthetic complexity, including **M39-M43**.

| Cat                                                | Synthetic Complexity               |
|----------------------------------------------------|------------------------------------|
| 2-cyPr-4-(3,5-tBu)Ph-6-Me                          | 1                                  |
| 2-Et-4-(3,5-tBu)Ph-6-nPent                         | 1                                  |
| 2-iPr-4-(3,5-tBu)Ph-6-Me                           | 1                                  |
| 2-Me-4-(5-Me)thienyl                               | 1                                  |
| 2-Me-4-C <sub>5</sub> F <sub>6</sub> -6-Ad         | 5                                  |
| 2-Me-4-C <sub>5</sub> F <sub>6</sub> -5-iPr        | 2                                  |
| 2-Me-4-(3,5-CF <sub>3</sub> )Ph                    | 1                                  |
| 2-Me-4-(2-Me-5-tBu)Ph                              | 1                                  |
| 2-Me-4-(3,5-tBu)Ph-6-TriPhSi                       | 4                                  |
| 2-Me-4-(3,5-TMS)Ph-6-tBu                           | 1                                  |
| 2-Me-4-C <sub>5</sub> F <sub>6</sub> -6-tBu        | 1                                  |
| 2-Me-4-C <sub>5</sub> F <sub>6</sub> -TMS          | 5                                  |
| 2-Me-4-C <sub>5</sub> F <sub>6</sub> -6-TriPhSi    | 5                                  |
| 2-Me-4-(2-tBu)Ph                                   | 2                                  |
| 2-Me-4-(4-pyridyl)                                 | 4                                  |
| 2-Me-4-(4-pyridyl)/AlMe <sub>3</sub> -adduct       | 4                                  |
| 2-Me-4-(4-pyridyl)-6-TMS/AlMe <sub>3</sub> -adduct | 4                                  |
| 2-Me-4-Ph-5-iPr                                    | 2                                  |
| 2-Me-4-Ph-5-tBu                                    | 5                                  |
| 2-Me-4-Ph-6-CF <sub>3</sub>                        | 4                                  |
| 2-Me-4-Ph-6-CN/AlMe <sub>3</sub> -adduct           | 5                                  |
| 2-Me-4-(5-pyrimidyl)                               | 4                                  |
| 2-nPent-4-(3,5-tBu)Ph-6-Me                         | 1                                  |
| 2-Me-4-(3,5-Ad)Ph                                  | Derivative Possible ( <b>M43</b> ) |
| 2-Et-4-(2-Me)Ph                                    | 1                                  |
| 2-iPr-4-(3,5-tBu)Ph-6-tBu                          | 1                                  |
| 2-Me-4-(3,5-tBu)Ph-7-NMe <sub>2</sub>              | 3                                  |
| 2-Me-4-Ph-5-Et                                     | 4                                  |
| 2-Me-4-Ph-5-Cl-6tBu                                | 4                                  |
| 2-Me-4-(3,5-tBu)Ph-6-Me ( <b>M39</b> )             | 1                                  |
| 2-Et-4-(3,5-tBu)Ph-6-Me ( <b>M40</b> )             | 1                                  |
| 2-Me-4-Ph-5-OMe ( <b>M41</b> )                     | 1                                  |
| 2-Me-4-(3,5-TMS)Ph ( <b>M42</b> )                  | 1                                  |
| 2-Me-4-[3,5-(1-Ad)-4-OMe]Ph ( <b>M43</b> )         | 4                                  |

Ranking: possible – 1 – 2 – 3 – 4 – 5 – very challenging/impossible

This ranking reflects personal opinions, based on local or commercial availability of precursor compounds, perceived ease of synthesis – overall and for individual steps – and overall synthetic effort.

#### 4. Full Gaussian Citation

Gaussian 16, Revision A.03, Frisch, M. J.; Trucks, G. W.; Schlegel, H. B.; Scuseria, G. E.; Robb, M. A.; Cheeseman, J. R.; Scalmani, G.; Barone, V.; Petersson, G. A.; Nakatsuji, H.; Li, X.; Caricato, M.; Marenich, A. V.; Bloino, J.; Janesko, B. G.; Gomperts, R.; Mennucci, B.; Hratchian, H. P.; Ortiz, J. V.; Izmaylov, A. F.; Sonnenberg, J. L.; Williams-Young, D.; Ding, F.; Lipparini, F.; Egidi, F.; Goings, J.; Peng, B.; Petrone, A.; Henderson, T.; Ranasinghe, D.; Zakrzewski, V. G.; Gao, J.; Rega, N.; Zheng, G.; Liang, W.; Hada, M.; Ehara, M.; Toyota, K.; Fukuda, R.; Hasegawa, J.; Ishida, M.; Nakajima, T.; Honda, Y.; Kitao, O.; Nakai, H.; Vreven, T.; Throssell, K.; Montgomery, J. A., Jr.; Peralta, J. E.; Ogliaro, F.; Bearpark, M. J.; Heyd, J. J.; Brothers, E. N.; Kudin, K. N.; Staroverov, V. N.; Keith, T. A.; Kobayashi, R.; Normand, J.; Raghavachari, K.; Rendell, A. P.; Burant, J. C.; Iyengar, S. S.; Tomasi, J.; Cossi, M.; Millam, J. M.; Klene, M.; Adamo, C.; Cammi, R.; Ochterski, J. W.; Martin, R. L.; Morokuma, K.; Farkas, O.; Foresman, J. B.; Fox, D. J. Gaussian, Inc., Wallingford CT, 2016.
