# Supplementary material for: An Integrated High Throughput Experimentation/Predictive QSAR Modeling Approach to ansa-Zirconocene Catalysts for Isotactic Polypropylene
Source: Polymers (Basel). 2020 Apr 27;12(5):1005. doi: 10.3390/polym12051005 (PMC7284373; doi:10.3390/polym12051005)
Supplement: Supplementary file 1 [file polymers-12-01005-s001.zip › structures_M1-M43.xyz]

48
 M1_2-Me
C    -2.5652810    0.8126000    0.6062620
C    -2.2231160    0.0721710   -0.5978250
H    -1.7130260    2.7245260    1.4306130
C    -1.1663010    0.7897250   -1.3048310
C    -0.9069680    1.9854440   -0.5177410
C    -1.7133110    1.9585220    0.6536570
C     0.9069680   -1.9854440   -0.5177410
C     1.7133110   -1.9585220    0.6536570
C     2.5652810   -0.8126000    0.6062620
C     2.2231160   -0.0721710   -0.5978250
C     1.1663010   -0.7897250   -1.3048310
C    -3.6099450    0.3653740    1.4640020
H    -5.1146990   -1.1388550    1.7705490
C    -4.3030580   -0.7833330    1.1279080
H    -4.5725430   -2.4026910   -0.3071550
C    -3.9867080   -1.5117810   -0.0582440
H    -2.7827730   -1.6566800   -1.8343520
C    -2.9702370   -1.1076690   -0.9080890
H     2.7827730    1.6566800   -1.8343520
C     2.9702370    1.1076690   -0.9080890
H     4.5725430    2.4026910   -0.3071550
C     3.9867080    1.5117810   -0.0582440
H     5.1146990    1.1388550    1.7705490
C     4.3030580    0.7833330    1.1279080
C     3.6099450   -0.3653740    1.4640020
H     1.7130260   -2.7245260    1.4306130
Si    0.0000000    0.0000000   -2.5868880
C     0.8228800    1.2598020   -3.7465810
H     0.0703140    1.5922100   -4.4872690
H     1.6490690    0.7768590   -4.3017620
H     1.2191670    2.1602460   -3.2511950
C    -0.8228800   -1.2598020   -3.7465810
H    -1.2191670   -2.1602460   -3.2511950
H    -0.0703140   -1.5922100   -4.4872690
H    -1.6490690   -0.7768590   -4.3017620
Zr    0.0000000    0.0000000    0.7576820
C     0.0000000    3.1452220   -0.8573990
H    -0.4346150    3.7299290   -1.6900600
H     0.1081700    3.8105480    0.0137260
H     1.0098110    2.8288190   -1.1602040
C     0.0000000   -3.1452220   -0.8573990
H     0.4346150   -3.7299290   -1.6900600
H    -0.1081700   -3.8105480    0.0137260
H    -1.0098110   -2.8288190   -1.1602040
Cl   -1.0245620   -1.5607550    2.3080890
Cl    1.0245620    1.5607550    2.3080890
H    -3.8560980    0.9315130    2.3674430
H     3.8560980   -0.9315130    2.3674430
68
 M2_2-Me-4-Ph
C     0.0000000    2.6963410    0.3818310
C     0.6002800    2.1397860    1.5862440
H    -2.0779750    2.4414620   -0.4464900
C    -0.4029680    1.3501860    2.2932750
C    -1.6197170    1.4638060    1.5056280
C    -1.3492200    2.2241500    0.3343310
C     1.6197170   -1.4638060    1.5056280
C     1.3492200   -2.2241500    0.3343310
C     0.0000000   -2.6963410    0.3818310
C    -0.6002800   -2.1397860    1.5862440
C     0.4029680   -1.3501860    2.2932750
C     0.7493760    3.5510710   -0.4957540
H     2.6684180    4.4688090   -0.7910580
C     2.0746530    3.8068710   -0.1523350
H     3.6972550    3.5578090    1.2722560
C     2.6648040    3.2839110    1.0318810
H     2.4120880    2.1265820    2.8296410
C     1.9562450    2.4667520    1.8968810
H    -2.4120880   -2.1265820    2.8296410
C    -1.9562450   -2.4667520    1.8968810
H    -3.6972550   -3.5578090    1.2722560
C    -2.6648040   -3.2839110    1.0318810
H    -2.6684180   -4.4688090   -0.7910580
C    -2.0746530   -3.8068710   -0.1523350
C    -0.7493760   -3.5510710   -0.4957540
H     2.0779750   -2.4414620   -0.4464900
Si    0.0000000    0.0000000    3.5747110
C    -1.4448230   -0.4021540    4.7405960
H    -1.5315240    0.4180870    5.4788520
H    -1.2280510   -1.3332040    5.2976770
H    -2.4257660   -0.5122930    4.2522480
C     1.4448230    0.4021540    4.7405960
H     2.4257660    0.5122930    4.2522480
H     1.5315240   -0.4180870    5.4788520
H     1.2280510    1.3332040    5.2976770
Zr    0.0000000    0.0000000    0.2326980
C    -3.0064310    0.9660250    1.8426140
H    -3.4397130    1.5883870    2.6485870
H    -3.6598640    1.0405270    0.9588940
H    -3.0260930   -0.0807580    2.1811290
C     3.0064310   -0.9660250    1.8426140
H     3.4397130   -1.5883870    2.6485870
H     3.6598640   -1.0405270    0.9588940
H     3.0260930    0.0807580    2.1811290
C    -0.1487670   -4.1430450   -1.7206190
C     1.0938360   -4.8140000   -1.6830300
C    -0.8335250   -4.0644570   -2.9535190
C     1.6308620   -5.3921290   -2.8408410
H     1.6274930   -4.9079970   -0.7314010
C    -0.2912580   -4.6373800   -4.1113800
H    -1.7832990   -3.5225080   -3.0016500
C     0.9420580   -5.3037150   -4.0601630
H     2.5900780   -5.9185680   -2.7888770
H    -0.8315200   -4.5541340   -5.0604990
H     1.3658160   -5.7503350   -4.9659010
C     0.1487670    4.1430450   -1.7206190
C     0.8335250    4.0644570   -2.9535190
C    -1.0938360    4.8140000   -1.6830300
C     0.2912580    4.6373800   -4.1113800
H     1.7832990    3.5225080   -3.0016500
C    -1.6308620    5.3921290   -2.8408410
H    -1.6274930    4.9079970   -0.7314010
C    -0.9420580    5.3037150   -4.0601630
H     0.8315200    4.5541340   -5.0604990
H    -2.5900780    5.9185680   -2.7888770
H    -1.3658160    5.7503350   -4.9659010
Cl    1.7975230    0.5100580   -1.3167170
Cl   -1.7975230   -0.5100580   -1.3167170
62
 M3_2-Me-4-furyl_frozen
C     1.3979700    2.3056790    0.2175790
C     1.6244510    1.5237720    1.4253830
C     2.9506750    1.1042640    1.7484450
C     3.9869770    1.4384580    0.8902340
C     3.7643590    2.1897900   -0.2914890
C     2.4950090    2.6558180   -0.6460170
C     0.0000000    2.6010600    0.1748630
C    -0.6256490    2.0883870    1.3454360
C     0.3572490    1.3639560    2.1310220
H     3.1552650    0.5764990    2.6825040
H     5.0101180    1.1358970    1.1358200
H     4.6122900    2.4386060   -0.9344240
H    -0.5246110    3.1546580   -0.6022220
Si    0.0000000    0.0000000    3.4123410
Zr    0.0000000    0.0000000    0.0674670
C    -1.4463700    0.4109150    4.5731270
H    -1.7577560   -0.4980140    5.1217380
H    -1.0941060    1.1491310    5.3190150
H    -2.3332540    0.8376760    4.0787690
C     1.4463700   -0.4109150    4.5731270
H     1.7577560    0.4980140    5.1217380
H     1.0941060   -1.1491310    5.3190150
H     2.3332540   -0.8376760    4.0787690
C    -2.0735680    2.3671150    1.6769980
H    -2.6402050    1.4618790    1.9437460
H    -2.1353190    3.0699520    2.5291210
H    -2.5771220    2.8267120    0.8117360
C    -0.3572490   -1.3639560    2.1310220
C    -1.6244510   -1.5237720    1.4253830
C     0.6256490   -2.0883870    1.3454360
C    -1.3979700   -2.3056790    0.2175790
C    -2.9506750   -1.1042640    1.7484450
C     0.0000000   -2.6010600    0.1748630
C    -2.4950090   -2.6558180   -0.6460170
C    -3.9869770   -1.4384580    0.8902340
H    -3.1552650   -0.5764990    2.6825040
H     0.5246110   -3.1546580   -0.6022220
C    -3.7643590   -2.1897900   -0.2914890
H    -5.0101180   -1.1358970    1.1358200
H    -4.6122900   -2.4386060   -0.9344240
C     2.0735680   -2.3671150    1.6769980
H     2.1353190   -3.0699520    2.5291210
H     2.5771220   -2.8267120    0.8117360
H     2.6402050   -1.4618790    1.9437460
C    -2.3133760   -3.4516590   -1.8512500
C    -1.3652970   -4.3560680   -2.2987560
O    -3.3451350   -3.3925440   -2.7744140
C    -1.8289900   -4.8652540   -3.5534110
H    -0.4538350   -4.6483260   -1.7817230
C    -3.0296340   -4.2486890   -3.7943350
H    -1.3333720   -5.5945490   -4.1935720
H    -3.7510470   -4.2874770   -4.6076690
C     2.3133760    3.4516590   -1.8512500
C     1.3652970    4.3560680   -2.2987560
O     3.3451350    3.3925440   -2.7744140
C     1.8289900    4.8652540   -3.5534110
H     0.4538350    4.6483260   -1.7817230
C     3.0296340    4.2486890   -3.7943350
H     1.3333720    5.5945490   -4.1935720
H     3.7510470    4.2874770   -4.6076690
Cl    1.8054300   -0.4916340   -1.4723660
Cl   -1.8054300    0.4916340   -1.4723660
82
 M3_lowest_INS_TS
C     3.0162507    2.6545396   -0.8585888
C     1.9534766    1.8102187   -1.3886171
C     0.6689223    1.8280087   -0.7587886
C     0.4780587    2.6289750    0.3575896
C     1.5138427    3.4494646    0.8750904
C     2.7778575    3.5123877    0.2774507
C     4.1557358    2.4590348   -1.7036452
C     3.8069815    1.5798509   -2.7683582
C     2.4462129    1.1159384   -2.5765072
H    -0.1684154    1.2768275   -1.1910479
H    -0.5081202    2.6681973    0.8303544
H     1.3049586    4.0974932    1.7300454
H     5.1169086    2.9653474   -1.6184785
Si    1.6688009   -0.4865133   -3.2798181
Zr    3.7184464    0.1076408   -0.7057532
C     2.2071332   -0.8848545   -5.0514621
H     1.9053584   -1.9192867   -5.3011530
H     1.6673103   -0.2061067   -5.7387475
H     3.2829652   -0.7794661   -5.2606779
C    -0.2242214   -0.5089764   -3.3088206
H    -0.5903804    0.3289434   -3.9311453
H    -0.5524462   -1.4500131   -3.7894999
H    -0.7176083   -0.4502737   -2.3262621
C     4.7373003    1.2832055   -3.9224339
H     4.9321040    0.2074596   -4.0593268
H     4.3019924    1.6672149   -4.8621497
H     5.7072001    1.7841876   -3.7718856
C     2.4417272   -1.6145262   -1.9366976
C     3.8140614   -2.1194617   -1.9506040
C     1.9912781   -1.7379394   -0.5645426
C     4.1891293   -2.5100552   -0.5975696
C     4.7441607   -2.3098214   -3.0174288
C     3.0683321   -2.2060545    0.2438006
C     5.4563944   -3.1415184   -0.3379401
C     5.9736972   -2.8936261   -2.7385879
H     4.4681980   -2.0713135   -4.0463203
H     2.9794467   -2.4278676    1.3062503
C     6.3259140   -3.3030902   -1.4273824
H     6.6805174   -3.0772350   -3.5534564
H     7.2879287   -3.7945382   -1.2616677
C     0.5905834   -1.5712960   -0.0227418
H    -0.0410705   -2.3991664   -0.3937438
H     0.5930844   -1.6191639    1.0782772
H     0.1135959   -0.6271868   -0.3192057
C     2.6117956   -0.0599647    3.5589587
H     2.3553006    0.9853754    3.8111314
H     1.8160517   -0.4551257    2.9012985
H     2.6043745   -0.6479638    4.4942068
H     4.2112555   -1.2006804    2.6534828
C     4.0025142   -0.1393799    2.8854146
C     3.9835014    0.6615604    1.5651865
H     4.0731293    1.7453039    1.7546351
H     2.9041334    0.5486439    1.1533090
C     6.0525490    0.1061516   -0.7643326
H     6.3306875   -0.9111855   -1.0673751
H     6.4212138    0.9043102   -1.4194504
C     6.0202625    0.3883131    0.6367456
H     6.1249066   -0.4740041    1.3075493
C     5.0768423    0.3402134    3.8813734
H     4.9497499    1.4125056    4.1211283
H     4.9826306   -0.2269128    4.8239521
H     6.1030622    0.1841563    3.5092511
C     6.6072082    1.6933336    1.1348779
H     6.3376595    1.9384961    2.1716059
H     7.7084816    1.5845898    1.0912940
H     6.3271750    2.5394066    0.4869935
C     5.8332602   -3.6315360    0.9805635
C     5.1504963   -4.0231198    2.1213917
O     7.1891416   -3.8382516    1.1770970
C     6.1283336   -4.4914204    3.0551803
H     4.0710140   -4.0347932    2.2612967
C     7.3441890   -4.3567529    2.4346163
H     5.9505364   -4.8882639    4.0540041
H     8.3709027   -4.5647862    2.7282961
C     3.7828953    4.4421600    0.7722965
C     4.8872721    5.0800934    0.2294356
O     3.6037626    4.8851495    2.0733419
C     5.4049044    5.9530401    1.2383049
H     5.2534979    4.9876850   -0.7917099
C     4.5936194    5.7955483    2.3328301
H     6.2623484    6.6200608    1.1573544
H     4.5785060    6.2265387    3.3316673
62
 M4_2-Me-4-thienyl
C    -0.0971560    2.6942290    0.4046060
C     0.5231680    2.1597560    1.6093740
H    -2.1644150    2.3558410   -0.4233000
C    -0.4506220    1.3351100    2.3168320
C    -1.6699440    1.4031980    1.5296170
C    -1.4276310    2.1740230    0.3584070
C     1.6699440   -1.4031980    1.5296170
C     1.4276310   -2.1740230    0.3584070
C     0.0971560   -2.6942290    0.4046060
C    -0.5231680   -2.1597560    1.6093740
C     0.4506220   -1.3351100    2.3168320
C     0.6245910    3.5827880   -0.4681250
H     2.5158780    4.5667820   -0.7529490
C     1.9436320    3.8807960   -0.1199160
H     3.5752430    3.6710080    1.2946650
C     2.5508560    3.3673330    1.0563560
H     2.3347580    2.1967130    2.8515020
C     1.8682370    2.5263830    1.9204970
H    -2.3347580   -2.1967130    2.8515020
C    -1.8682370   -2.5263830    1.9204970
H    -3.5752430   -3.6710080    1.2946650
C    -2.5508560   -3.3673330    1.0563560
H    -2.5158780   -4.5667820   -0.7529490
C    -1.9436320   -3.8807960   -0.1199160
C    -0.6245910   -3.5827880   -0.4681250
H     2.1644150   -2.3558410   -0.4233000
Si    0.0000000    0.0000000    3.5993140
C    -1.4300730   -0.4525040    4.7643860
H    -1.5476650    0.3651050    5.5012420
H    -1.1799250   -1.3742400    5.3229420
H    -2.4057420   -0.5992580    4.2750370
C     1.4300730    0.4525040    4.7643860
H     2.4057420    0.5992580    4.2750370
H     1.5476650   -0.3651050    5.5012420
H     1.1799250    1.3742400    5.3229420
Zr    0.0000000    0.0000000    0.2537510
C    -3.0386250    0.8578830    1.8660350
H    -3.4987500    1.4738950    2.6619820
H    -3.6900950    0.8966830    0.9785160
H    -3.0210750   -0.1844980    2.2180260
C     3.0386250   -0.8578830    1.8660350
H     3.4987500   -1.4738950    2.6619820
H     3.6900950   -0.8966830    0.9785160
H     3.0210750    0.1844980    2.2180260
Cl    1.7741360    0.5797460   -1.2921700
Cl   -1.7741360   -0.5797460   -1.2921700
C     0.0000000   -4.1571130   -1.6658010
C     1.3012360   -4.5961610   -1.8750810
S    -0.9561750   -4.4096020   -3.1238440
C     1.5210510   -5.1407870   -3.1743110
H     2.0664370   -4.5704760   -1.0958770
C     0.3911040   -5.1112400   -3.9637990
H     2.4803100   -5.5419350   -3.5116760
H     0.2735150   -5.4426760   -4.9963890
C     0.0000000    4.1571130   -1.6658010
C    -1.3012360    4.5961610   -1.8750810
S     0.9561750    4.4096020   -3.1238440
C    -1.5210510    5.1407870   -3.1743110
H    -2.0664370    4.5704760   -1.0958770
C    -0.3911040    5.1112400   -3.9637990
H    -2.4803100    5.5419350   -3.5116760
H    -0.2735150    5.4426760   -4.9963890
48
 M5_2-Me-4-Cl
C     0.0000000    2.6870570    0.2656080
C    -0.6056350    2.1423910   -0.9407790
H     2.0732420    2.4703750    1.0950510
C     0.3999040    1.3504340   -1.6413030
C     1.6174540    1.4677770   -0.8546490
C     1.3494370    2.2294160    0.3164780
C    -1.6174540   -1.4677770   -0.8546490
C    -1.3494370   -2.2294160    0.3164780
C     0.0000000   -2.6870570    0.2656080
C     0.6056350   -2.1423910   -0.9407790
C    -0.3999040   -1.3504340   -1.6413030
C    -0.7586110    3.5471440    1.1080520
H    -2.6406860    4.5272040    1.4331510
C    -2.0650230    3.8626640    0.7842740
H    -3.6769590    3.6276600   -0.6502210
C    -2.6503770    3.3381860   -0.4046690
H    -2.4167610    2.1540920   -2.1845730
C    -1.9545440    2.4952030   -1.2556350
H     2.4167610   -2.1540920   -2.1845730
C     1.9545440   -2.4952030   -1.2556350
H     3.6769590   -3.6276600   -0.6502210
C     2.6503770   -3.3381860   -0.4046690
H     2.6406860   -4.5272040    1.4331510
C     2.0650230   -3.8626640    0.7842740
C     0.7586110   -3.5471440    1.1080520
H    -2.0732420   -2.4703750    1.0950510
Si    0.0000000    0.0000000   -2.9253720
C     1.4476680   -0.4033200   -4.0854170
H     1.5374400    0.4158850   -4.8242600
H     1.2316200   -1.3347510   -4.6420250
H     2.4265630   -0.5136190   -3.5930930
C    -1.4476680    0.4033200   -4.0854170
H    -2.4265630    0.5136190   -3.5930930
H    -1.5374400   -0.4158850   -4.8242600
H    -1.2316200    1.3347510   -4.6420250
Zr    0.0000000    0.0000000    0.4243490
C     3.0021620    0.9657550   -1.1934820
H     3.4189820    1.5575590   -2.0300660
H     3.6682940    1.0791580   -0.3237410
H     3.0224170   -0.0942080   -1.4891790
C    -3.0021620   -0.9657550   -1.1934820
H    -3.4189820   -1.5575590   -2.0300660
H    -3.6682940   -1.0791580   -0.3237410
H    -3.0224170    0.0942080   -1.4891790
Cl   -1.7974720    0.5188440    1.9571520
Cl    1.7974720   -0.5188440    1.9571520
Cl   -0.0090000    4.2076500    2.5492430
Cl    0.0090000   -4.2076500    2.5492430
48
 M6_2-Me-4-Br
C    -1.3925220    2.3044980   -0.0572710
C    -1.6294320    1.5214490   -1.2630400
H     0.4979270    3.1881420    0.7671160
C    -0.3607320    1.3615990   -1.9648120
C     0.6218790    2.0923700   -1.1805060
C     0.0000000    2.6082730   -0.0101330
C    -0.6218790   -2.0923700   -1.1805060
C     0.0000000   -2.6082730   -0.0101330
C     1.3925220   -2.3044980   -0.0572710
C     1.6294320   -1.5214490   -1.2630400
C     0.3607320   -1.3615990   -1.9648120
C    -2.4890980    2.6500930    0.7816880
H    -4.6108570    2.5144070    1.1006140
C    -3.7701740    2.2435360    0.4572730
H    -5.0268370    1.2032160   -0.9752230
C    -3.9987190    1.4877950   -0.7298770
H    -3.1819660    0.5916860   -2.5065560
C    -2.9659170    1.1257940   -1.5787220
H     3.1819660   -0.5916860   -2.5065560
C     2.9659170   -1.1257940   -1.5787220
H     5.0268370   -1.2032160   -0.9752230
C     3.9987190   -1.4877950   -0.7298770
H     4.6108570   -2.5144070    1.1006140
C     3.7701740   -2.2435360    0.4572730
C     2.4890980   -2.6500930    0.7816880
H    -0.4979270   -3.1881420    0.7671160
Si    0.0000000    0.0000000   -3.2483440
C     1.4507920    0.4096680   -4.4019700
H     1.1083970    1.1587350   -5.1414440
H     1.7554360   -0.4965220   -4.9586530
H     2.3399050    0.8229960   -3.9000650
C    -1.4507920   -0.4096680   -4.4019700
H    -2.3399050   -0.8229960   -3.9000650
H    -1.1083970   -1.1587350   -5.1414440
H    -1.7554360    0.4965220   -4.9586530
Zr    0.0000000    0.0000000    0.1014980
C     2.0688100    2.3704830   -1.5170130
H     2.1280770    3.0543950   -2.3842880
H     2.5686250    2.8514300   -0.6615540
H     2.6402730    1.4623570   -1.7639930
C    -2.0688100   -2.3704830   -1.5170130
H    -2.1280770   -3.0543950   -2.3842880
H    -2.5686250   -2.8514300   -0.6615540
H    -2.6402730   -1.4623570   -1.7639930
Cl   -1.8101450   -0.4891890    1.6269360
Cl    1.8101450    0.4891890    1.6269360
Br   -2.1741650    3.6952660    2.3503110
Br    2.1741650   -3.6952660    2.3503110
54
 M7_2-Me-4-Me
C    -2.5529070    0.8013400    0.4263180
C    -2.2178710    0.0701200   -0.7843880
H    -1.6973180    2.7174180    1.2477790
C    -1.1646190    0.7912090   -1.4924250
C    -0.9026450    1.9843820   -0.7036530
C    -1.7055240    1.9524500    0.4705540
C     0.9026450   -1.9843820   -0.7036530
C     1.7055240   -1.9524500    0.4705540
C     2.5529070   -0.8013400    0.4263180
C     2.2178710   -0.0701200   -0.7843880
C     1.1646190   -0.7912090   -1.4924250
C    -3.5908010    0.3585710    1.3094850
H    -5.0835760   -1.1564010    1.5935890
C    -4.2770030   -0.7915980    0.9479730
H    -4.5644590   -2.4000360   -0.4903900
C    -3.9727290   -1.5120280   -0.2445570
H    -2.7791630   -1.6535920   -2.0301720
C    -2.9613780   -1.1099270   -1.1001280
H     2.7791630    1.6535920   -2.0301720
C     2.9613780    1.1099270   -1.1001280
H     4.5644590    2.4000360   -0.4903900
C     3.9727290    1.5120280   -0.2445570
H     5.0835760    1.1564010    1.5935890
C     4.2770030    0.7915980    0.9479730
C     3.5908010   -0.3585710    1.3094850
H     1.6973180   -2.7174180    1.2477790
Si    0.0000000    0.0000000   -2.7756820
C     0.8224600    1.2597660   -3.9358990
H     0.0694800    1.5908450   -4.6768090
H     1.6493630    0.7777480   -4.4908040
H     1.2174490    2.1608430   -3.4406630
C    -0.8224600   -1.2597660   -3.9358990
H    -1.2174490   -2.1608430   -3.4406630
H    -0.0694800   -1.5908450   -4.6768090
H    -1.6493630   -0.7777480   -4.4908040
Zr    0.0000000    0.0000000    0.5718700
C     0.0000000    3.1475060   -1.0438170
H    -0.4382250    3.7322650   -1.8745710
H     0.1078550    3.8119390   -0.1718610
H     1.0102360    2.8346630   -1.3487120
C     0.0000000   -3.1475060   -1.0438170
H     0.4382250   -3.7322650   -1.8745710
H    -0.1078550   -3.8119390   -0.1718610
H    -1.0102360   -2.8346630   -1.3487120
Cl   -1.0226790   -1.5491070    2.1420540
Cl    1.0226790    1.5491070    2.1420540
C    -3.8924380    1.1212170    2.5738190
H    -4.1336320    2.1794960    2.3592430
H    -4.7428740    0.6748920    3.1147750
H    -3.0135050    1.1158900    3.2463570
C     3.8924380   -1.1212170    2.5738190
H     3.0135050   -1.1158900    3.2463570
H     4.1336320   -2.1794960    2.3592430
H     4.7428740   -0.6748920    3.1147750
66
 M8_2-Me-4-iPr
C     0.0000000    2.6796310    0.0982200
C    -0.5959540    2.1380920   -1.1132920
H     2.0898040    2.4338550    0.9118880
C     0.4055410    1.3477630   -1.8218380
C     1.6223520    1.4557910   -1.0339900
C     1.3524410    2.2129390    0.1396520
C    -1.6223520   -1.4557910   -1.0339900
C    -1.3524410   -2.2129390    0.1396520
C     0.0000000   -2.6796310    0.0982200
C     0.5959540   -2.1380920   -1.1132920
C    -0.4055410   -1.3477630   -1.8218380
C    -0.7353280    3.5362170    0.9844030
H    -2.6467580    4.4816880    1.2639050
C    -2.0425600    3.8324270    0.6232950
H    -3.6602590    3.6225910   -0.8159480
C    -2.6339390    3.3282460   -0.5723460
H    -2.4053460    2.1561770   -2.3637330
C    -1.9444520    2.4906940   -1.4313310
H     2.4053460   -2.1561770   -2.3637330
C     1.9444520   -2.4906940   -1.4313310
H     3.6602590   -3.6225910   -0.8159480
C     2.6339390   -3.3282460   -0.5723460
H     2.6467580   -4.4816880    1.2639050
C     2.0425600   -3.8324270    0.6232950
C     0.7353280   -3.5362170    0.9844030
H    -2.0898040   -2.4338550    0.9118880
Si    0.0000000    0.0000000   -3.1045750
C     1.4444180   -0.4085790   -4.2686170
H     1.5380360    0.4117830   -5.0058910
H     1.2232320   -1.3377970   -4.8270310
H     2.4231810   -0.5257150   -3.7774930
C    -1.4444180    0.4085790   -4.2686170
H    -2.4231810    0.5257150   -3.7774930
H    -1.5380360   -0.4117830   -5.0058910
H    -1.2232320    1.3377970   -4.8270310
Zr    0.0000000    0.0000000    0.2404790
C     3.0067920    0.9531990   -1.3741200
H     3.4312660    1.5566550   -2.1987600
H     3.6692050    1.0489640   -0.4991140
H     3.0244540   -0.1017790   -1.6871350
C    -3.0067920   -0.9531990   -1.3741200
H    -3.4312660   -1.5566550   -2.1987600
H    -3.6692050   -1.0489640   -0.4991140
H    -3.0244540    0.1017790   -1.6871350
Cl   -1.7860050    0.5051640    1.8137050
Cl    1.7860050   -0.5051640    1.8137050
C     0.0569310   -4.0922630    2.2318220
H    -0.6091930   -3.2941360    2.6132990
C     1.0395750   -4.4500570    3.3614150
C    -0.8271950   -5.3113570    1.8705480
H     0.4790100   -4.7455970    4.2663430
H     1.6871570   -5.3029760    3.0843060
H     1.6845090   -3.5919530    3.6175060
H    -0.2030440   -6.1461490    1.5016790
H    -1.3822960   -5.6625630    2.7599180
H    -1.5605560   -5.0638330    1.0828050
C    -0.0569310    4.0922630    2.2318220
H     0.6091930    3.2941360    2.6132990
C    -1.0395750    4.4500570    3.3614150
C     0.8271950    5.3113570    1.8705480
H    -0.4790100    4.7455970    4.2663430
H    -1.6871570    5.3029760    3.0843060
H    -1.6845090    3.5919530    3.6175060
H     0.2030440    6.1461490    1.5016790
H     1.3822960    5.6625630    2.7599180
H     1.5605560    5.0638330    1.0828050
68
 M9_2-Me-4-(4-F)phenyl
C    -1.2892070    2.3722060    0.6240890
C    -0.4978600    2.1704740    1.8297440
H    -2.9939840    1.1538500   -0.2034690
C    -0.9994150    0.9954940    2.5339960
C    -2.1218350    0.5131080    1.7461710
C    -2.2490870    1.3122420    0.5764350
C     2.1218350   -0.5131080    1.7461710
C     2.2490870   -1.3122420    0.5764350
C     1.2892070   -2.3722060    0.6240890
C     0.4978600   -2.1704740    1.8297440
C     0.9994150   -0.9954940    2.5339960
C    -1.0391640    3.4837750   -0.2505340
H     0.2045330    5.2110470   -0.5386160
C     0.0000000    4.3435280    0.0972350
H     1.5373400    4.9029580    1.5278640
C     0.7646240    4.1667280    1.2838260
H     1.0915680    3.0267280    3.0814740
C     0.5323950    3.1088110    2.1467220
H    -1.0915680   -3.0267280    3.0814740
C    -0.5323950   -3.1088110    2.1467220
H    -1.5373400   -4.9029580    1.5278640
C    -0.7646240   -4.1667280    1.2838260
H    -0.2045330   -5.2110470   -0.5386160
C     0.0000000   -4.3435280    0.0972350
C     1.0391640   -3.4837750   -0.2505340
H     2.9939840   -1.1538500   -0.2034690
Si    0.0000000    0.0000000    3.8137530
C    -1.0776370   -1.0497790    4.9733230
H    -1.5424920   -0.3788930    5.7210960
H    -0.4433810   -1.7730910    5.5198670
H    -1.8893970   -1.6064460    4.4789540
C     1.0776370    1.0497790    4.9733230
H     1.8893970    1.6064460    4.4789540
H     1.5424920    0.3788930    5.7210960
H     0.4433810    1.7730910    5.5198670
Zr    0.0000000    0.0000000    0.4738130
C    -3.0871180   -0.6037000    2.0723220
H    -3.6858090   -0.3387880    2.9636320
H    -3.7753770   -0.7615100    1.2269290
H    -2.5888580   -1.5656480    2.2710810
C     3.0871180    0.6037000    2.0723220
H     3.6858090    0.3387880    2.9636320
H     3.7753770    0.7615100    1.2269290
H     2.5888580    1.5656480    2.2710810
C     1.8492100   -3.7197540   -1.4741960
C     3.2615390   -3.7131750   -1.4350100
C     1.2147070   -3.9908060   -2.7069760
C     4.0207490   -3.9762930   -2.5818170
H     3.7753610   -3.5306440   -0.4858790
C     1.9591210   -4.2491970   -3.8646130
H     0.1219960   -3.9697490   -2.7608890
C     3.3531640   -4.2386930   -3.7806140
H     5.1138390   -3.9870920   -2.5559760
H     1.4745870   -4.4454910   -4.8249600
C    -1.8492100    3.7197540   -1.4741960
C    -1.2147070    3.9908060   -2.7069760
C    -3.2615390    3.7131750   -1.4350100
C    -1.9591210    4.2491970   -3.8646130
H    -0.1219960    3.9697490   -2.7608890
C    -4.0207490    3.9762930   -2.5818170
H    -3.7753610    3.5306440   -0.4858790
C    -3.3531640    4.2386930   -3.7806140
H    -1.4745870    4.4454910   -4.8249600
H    -5.1138390    3.9870920   -2.5559760
Cl    1.3362570    1.3086660   -1.0721700
Cl   -1.3362570   -1.3086660   -1.0721700
F    -4.0848150    4.4915640   -4.9008190
F     4.0848150   -4.4915640   -4.9008190
74
 M10_2-Me-4-(4-Me)Ph
C    -1.2881840    2.3754500    0.6381720
C    -0.4964780    2.1717630    1.8432610
H    -2.9934390    1.1598730   -0.1906080
C    -0.9986760    0.9965280    2.5466500
C    -2.1211840    0.5151370    1.7580990
C    -2.2483490    1.3157700    0.5895230
C     2.1211840   -0.5151370    1.7580990
C     2.2483490   -1.3157700    0.5895230
C     1.2881840   -2.3754500    0.6381720
C     0.4964780   -2.1717630    1.8432610
C     0.9986760   -0.9965280    2.5466500
C    -1.0403830    3.4892740   -0.2347150
H     0.2034010    5.2165400   -0.5199630
C     0.0000000    4.3475630    0.1142200
H     1.5389320    4.9040990    1.5442440
C     0.7657460    4.1684170    1.2995870
H     1.0936980    3.0258560    3.0957240
C     0.5341340    3.1092690    2.1612890
H    -1.0936980   -3.0258560    3.0957240
C    -0.5341340   -3.1092690    2.1612890
H    -1.5389320   -4.9040990    1.5442440
C    -0.7657460   -4.1684170    1.2995870
H    -0.2034010   -5.2165400   -0.5199630
C     0.0000000   -4.3475630    0.1142200
C     1.0403830   -3.4892740   -0.2347150
H     2.9934390   -1.1598730   -0.1906080
Si    0.0000000    0.0000000    3.8249930
C    -1.0785350   -1.0481710    4.9857790
H    -1.5428700   -0.3763400    5.7330830
H    -0.4451410   -1.7719580    5.5327430
H    -1.8907330   -1.6042780    4.4914340
C     1.0785350    1.0481710    4.9857790
H     1.8907330    1.6042780    4.4914340
H     1.5428700    0.3763400    5.7330830
H     0.4451410    1.7719580    5.5327430
Zr    0.0000000    0.0000000    0.4868310
C    -3.0865840   -0.6019430    2.0832460
H    -3.6857430   -0.3378970    2.9745880
H    -3.7744420   -0.7590070    1.2373550
H    -2.5883340   -1.5641210    2.2811610
C     3.0865840    0.6019430    2.0832460
H     3.6857430    0.3378970    2.9745880
H     3.7744420    0.7590070    1.2373550
H     2.5883340    1.5641210    2.2811610
C     1.8544280   -3.7310440   -1.4539950
C     3.2654720   -3.7138530   -1.4178020
C     1.2291650   -4.0257360   -2.6854150
C     4.0177630   -3.9862410   -2.5670040
H     3.7798370   -3.5203380   -0.4705370
C     1.9877530   -4.2898860   -3.8312700
H     0.1359640   -4.0209230   -2.7434650
C     3.3959440   -4.2744030   -3.7968270
H     5.1125820   -3.9826020   -2.5050320
H     1.4740030   -4.5061770   -4.7755770
C    -1.8544280    3.7310440   -1.4539950
C    -1.2291650    4.0257360   -2.6854150
C    -3.2654720    3.7138530   -1.4178020
C    -1.9877530    4.2898860   -3.8312700
H    -0.1359640    4.0209230   -2.7434650
C    -4.0177630    3.9862410   -2.5670040
H    -3.7798370    3.5203380   -0.4705370
C    -3.3959440    4.2744030   -3.7968270
H    -1.4740030    4.5061770   -4.7755770
H    -5.1125820    3.9826020   -2.5050320
Cl    1.3377440    1.3090360   -1.0573460
Cl   -1.3377440   -1.3090360   -1.0573460
C     4.2101530   -4.5325040   -5.0465150
H     5.2312960   -4.8704690   -4.7994270
H     3.7362560   -5.2988080   -5.6850790
H     4.3035810   -3.6118670   -5.6550290
C    -4.2101530    4.5325040   -5.0465150
H    -3.7362560    5.2988080   -5.6850790
H    -4.3035810    3.6118670   -5.6550290
H    -5.2312960    4.8704690   -4.7994270
92
 M11_2-Me-4-(4-tBu)phenyl
C    -1.2884600    2.3745100    1.3285940
C    -0.4960860    2.1717700    2.5333290
H    -2.9948080    1.1597560    0.5015330
C    -0.9982210    0.9970120    3.2377460
C    -2.1213000    0.5153800    2.4500200
C    -2.2490610    1.3153010    1.2811410
C     2.1213000   -0.5153800    2.4500200
C     2.2490610   -1.3153010    1.2811410
C     1.2884600   -2.3745100    1.3285940
C     0.4960860   -2.1717700    2.5333290
C     0.9982210   -0.9970120    3.2377460
C    -1.0409460    3.4867210    0.4538820
H     0.2035580    5.2122710    0.1633620
C     0.0000000    4.3451480    0.8000180
H     1.5398260    4.9033090    2.2286130
C     0.7661460    4.1676170    1.9855400
H     1.0950020    3.0280140    3.7833680
C     0.5347560    3.1099100    2.8491710
H    -1.0950020   -3.0280140    3.7833680
C    -0.5347560   -3.1099100    2.8491710
H    -1.5398260   -4.9033090    2.2286130
C    -0.7661460   -4.1676170    1.9855400
H    -0.2035580   -5.2122710    0.1633620
C     0.0000000   -4.3451480    0.8000180
C     1.0409460   -3.4867210    0.4538820
H     2.9948080   -1.1597560    0.5015330
Si    0.0000000    0.0000000    4.5160110
C    -1.0782480   -1.0485180    5.6766690
H    -1.5440340   -0.3770220    6.4233610
H    -0.4441310   -1.7711390    6.2243560
H    -1.8892400   -1.6061510    5.1820780
C     1.0782480    1.0485180    5.6766690
H     1.8892400    1.6061510    5.1820780
H     1.5440340    0.3770220    6.4233610
H     0.4441310    1.7711390    6.2243560
Zr    0.0000000    0.0000000    1.1780390
C    -3.0865230   -0.6015280    2.7763520
H    -3.6830740   -0.3384430    3.6697040
H    -3.7768090   -0.7569530    1.9321330
H    -2.5883610   -1.5643380    2.9714650
C     3.0865230    0.6015280    2.7763520
H     3.6830740    0.3384430    3.6697040
H     3.7768090    0.7569530    1.9321330
H     2.5883610    1.5643380    2.9714650
C     1.8560570   -3.7244150   -0.7652390
C     3.2681480   -3.7184190   -0.7273680
C     1.2380140   -3.9965980   -2.0017420
C     4.0196950   -3.9798980   -1.8767010
H     3.7834250   -3.5376040    0.2220540
C     1.9990180   -4.2484320   -3.1523960
H     0.1453320   -3.9802960   -2.0680910
C     3.4067090   -4.2474470   -3.1211500
H     5.1126430   -3.9791520   -1.7974180
H     1.4701290   -4.4386240   -4.0903180
C    -1.8560570    3.7244150   -0.7652390
C    -1.2380140    3.9965980   -2.0017420
C    -3.2681480    3.7184190   -0.7273680
C    -1.9990180    4.2484320   -3.1523960
H    -0.1453320    3.9802960   -2.0680910
C    -4.0196950    3.9798980   -1.8767010
H    -3.7834250    3.5376040    0.2220540
C    -3.4067090    4.2474470   -3.1211500
H    -1.4701290    4.4386240   -4.0903180
H    -5.1126430    3.9791520   -1.7974180
Cl    1.3381780    1.3078100   -0.3667960
Cl   -1.3381780   -1.3078100   -0.3667960
C    -4.2754340    4.5176930   -4.3663960
C    -3.4244810    4.7733220   -5.6292500
C    -5.1856000    3.2906760   -4.6351160
C    -5.1600220    5.7670560   -4.1152390
H    -4.0902730    4.9566270   -6.4920920
H    -2.7747190    5.6596160   -5.5135010
H    -2.7870210    3.9052020   -5.8756130
H    -5.8472870    3.0785770   -3.7766750
H    -5.8250160    3.4766040   -5.5184250
H    -4.5807560    2.3867440   -4.8291340
H    -5.8036440    5.9621480   -4.9935420
H    -5.8166280    5.6315080   -3.2374510
H    -4.5362930    6.6618830   -3.9382720
C     4.2754340   -4.5176930   -4.3663960
C     3.4244810   -4.7733220   -5.6292500
C     5.1856000   -3.2906760   -4.6351160
C     5.1600220   -5.7670560   -4.1152390
H     4.0902730   -4.9566270   -6.4920920
H     2.7747190   -5.6596160   -5.5135010
H     2.7870210   -3.9052020   -5.8756130
H     5.8472870   -3.0785770   -3.7766750
H     5.8250160   -3.4766040   -5.5184250
H     4.5807560   -2.3867440   -4.8291340
H     5.8036440   -5.9621480   -4.9935420
H     5.8166280   -5.6315080   -3.2374510
H     4.5362930   -6.6618830   -3.9382720
74
 M12_2-Me-4-(4-CF3)phenyl
C    -1.2916250    2.3705760    1.3188710
C    -0.5002420    2.1699210    2.5248580
H    -2.9959190    1.1502790    0.4921530
C    -1.0000620    0.9943640    3.2290130
C    -2.1221880    0.5113700    2.4416360
C    -2.2503910    1.3099100    1.2712300
C     2.1221880   -0.5113700    2.4416360
C     2.2503910   -1.3099100    1.2712300
C     1.2916250   -2.3705760    1.3188710
C     0.5002420   -2.1699210    2.5248580
C     1.0000620   -0.9943640    3.2290130
C    -1.0376420    3.4810440    0.4444580
H     0.2065110    5.2078780    0.1538920
C     0.0000000    4.3424560    0.7918010
H     1.5295910    4.9079880    2.2283890
C     0.7595700    4.1699010    1.9822000
H     1.0835390    3.0301920    3.7799680
C     0.5265640    3.1112500    2.8438050
H    -1.0835390   -3.0301920    3.7799680
C    -0.5265640   -3.1112500    2.8438050
H    -1.5295910   -4.9079880    2.2283890
C    -0.7595700   -4.1699010    1.9822000
H    -0.2065110   -5.2078780    0.1538920
C     0.0000000   -4.3424560    0.7918010
C     1.0376420   -3.4810440    0.4444580
H     2.9959190   -1.1502790    0.4921530
Si    0.0000000    0.0000000    4.5104000
C    -1.0769340   -1.0508010    5.6687320
H    -1.5432600   -0.3800530    6.4156540
H    -0.4418960   -1.7724890    6.2164510
H    -1.8876540   -1.6090580    5.1745080
C     1.0769340    1.0508010    5.6687320
H     1.8876540    1.6090580    5.1745080
H     1.5432600    0.3800530    6.4156540
H     0.4418960    1.7724890    6.2164510
Zr    0.0000000    0.0000000    1.1685860
C    -3.0859090   -0.6067000    2.7677900
H    -3.6844490   -0.3424730    3.6592890
H    -3.7742550   -0.7656860    1.9227690
H    -2.5861000   -1.5677740    2.9667950
C     3.0859090    0.6067000    2.7677900
H     3.6844490    0.3424730    3.6592890
H     3.7742550    0.7656860    1.9227690
H     2.5861000    1.5677740    2.9667950
C     1.8414600   -3.7170620   -0.7833150
C     3.2538150   -3.7112710   -0.7519880
C     1.1979530   -3.9821050   -2.0123710
C     3.9991170   -3.9728660   -1.9061240
H     3.7734440   -3.5273630    0.1935550
C     1.9393320   -4.2381820   -3.1703040
H     0.1052180   -3.9555930   -2.0598090
C     3.3425870   -4.2384960   -3.1190070
H     5.0921070   -3.9763400   -1.8676730
H     1.4305140   -4.4275550   -4.1195410
C    -1.8414600    3.7170620   -0.7833150
C    -1.1979530    3.9821050   -2.0123710
C    -3.2538150    3.7112710   -0.7519880
C    -1.9393320    4.2381820   -3.1703040
H    -0.1052180    3.9555930   -2.0598090
C    -3.9991170    3.9728660   -1.9061240
H    -3.7734440    3.5273630    0.1935550
C    -3.3425870    4.2384960   -3.1190070
H    -1.4305140    4.4275550   -4.1195410
H    -5.0921070    3.9763400   -1.8676730
Cl    1.3352730    1.3099050   -0.3746490
Cl   -1.3352730   -1.3099050   -0.3746490
C     4.1408430   -4.5722080   -4.3525460
F     5.3619800   -3.9606940   -4.3592800
F     4.3830250   -5.9159260   -4.4603990
F     3.4972090   -4.2041920   -5.4985800
C    -4.1408430    4.5722080   -4.3525460
F    -4.3830250    5.9159260   -4.4603990
F    -3.4972090    4.2041920   -5.4985800
F    -5.3619800    3.9606940   -4.3592800
86
 M13_2-Me-4-(2,4,6-Me)Ph
C    -1.2450770    2.4302240    0.5940760
C    -0.4233730    2.1944260    1.7737640
H    -3.0065210    1.2859810   -0.1995770
C    -0.9541600    1.0377860    2.4924600
C    -2.1080280    0.5943600    1.7255080
C    -2.2346050    1.4005860    0.5627080
C     2.1080280   -0.5943600    1.7255080
C     2.2346050   -1.4005860    0.5627080
C     1.2450770   -2.4302240    0.5940760
C     0.4233730   -2.1944260    1.7737640
C     0.9541600   -1.0377860    2.4924600
C    -1.0662690    3.5897870   -0.2334260
C     0.0000000    4.4252690    0.0857050
H     1.6405680    4.8994420    1.4322630
C     0.8419180    4.1838650    1.2105160
H     1.2342720    3.0058620    2.9692040
C     0.6349390    3.1105630    2.0616480
H    -1.2342720   -3.0058620    2.9692040
C    -0.6349390   -3.1105630    2.0616480
H    -1.6405680   -4.8994420    1.4322630
C    -0.8419180   -4.1838650    1.2105160
C     0.0000000   -4.4252690    0.0857050
C     1.0662690   -3.5897870   -0.2334260
H     3.0065210   -1.2859810   -0.1995770
Si    0.0000000    0.0000000    3.7697660
C    -1.1147550   -1.0105200    4.9283230
H    -1.6010960   -0.3207660    5.6444440
H    -0.4934450   -1.7169100    5.5109220
H    -1.9102100   -1.5848290    4.4278620
Zr    0.0000000    0.0000000    0.4525370
C    -3.1063710   -0.4872200    2.0722070
H    -3.8385960   -0.5933690    1.2562100
H    -2.6454770   -1.4756660    2.2259370
H    -3.6518350   -0.2179110    2.9955640
C     3.1063710    0.4872200    2.0722070
H     2.6454770    1.4756660    2.2259370
H     3.6518350    0.2179110    2.9955640
H     3.8385960    0.5933690    1.2562100
H    -0.1577960   -5.3340350   -0.5048570
H     0.1577960    5.3340350   -0.5048570
C    -2.0843670    3.9613720   -1.2748430
C    -1.7996770    3.8990870   -2.6652720
C    -3.3554910    4.4276500   -0.8415180
C    -2.7962730    4.2722600   -3.5836130
C    -4.3189920    4.7934850   -1.7990520
C    -4.0661240    4.7144240   -3.1766260
C     2.0843670   -3.9613720   -1.2748430
C     1.7996770   -3.8990870   -2.6652720
C     3.3554910   -4.4276500   -0.8415180
C     2.7962730   -4.2722600   -3.5836130
C     4.3189920   -4.7934850   -1.7990520
C     4.0661240   -4.7144240   -3.1766260
C     1.1147550    1.0105200    4.9283230
H     0.4934450    1.7169100    5.5109220
H     1.6010960    0.3207660    5.6444440
H     1.9102100    1.5848290    4.4278620
C    -3.6914670    4.5750780    0.6304010
H    -3.8437300    3.5935640    1.1175880
H    -2.8805630    5.0824220    1.1826270
H    -4.6179680    5.1603380    0.7575890
C    -0.4578480    3.4316250   -3.1887380
H     0.3731040    4.0494740   -2.8048780
H    -0.2416590    2.3945830   -2.8801530
H    -0.4386610    3.4786940   -4.2906080
C     3.6914670   -4.5750780    0.6304010
H     3.8437300   -3.5935640    1.1175880
H     2.8805630   -5.0824220    1.1826270
H     4.6179680   -5.1603380    0.7575890
C     0.4578480   -3.4316250   -3.1887380
H    -0.3731040   -4.0494740   -2.8048780
H     0.2416590   -2.3945830   -2.8801530
H     0.4386610   -3.4786940   -4.2906080
H     5.2931470   -5.1602290   -1.4509650
H     2.5655980   -4.2144670   -4.6549670
H    -2.5655980    4.2144670   -4.6549670
H    -5.2931470    5.1602290   -1.4509650
Cl   -1.4262480   -1.2580020   -1.0504250
Cl    1.4262480    1.2580020   -1.0504250
C     5.1256850   -5.0822570   -4.1939110
H     5.9399550   -5.6677340   -3.7335720
H     4.6998460   -5.6751690   -5.0232680
H     5.5775210   -4.1756810   -4.6411480
C    -5.1256850    5.0822570   -4.1939110
H    -5.5775210    4.1756810   -4.6411480
H    -5.9399550    5.6677340   -3.7335720
H    -4.6998460    5.6751690   -5.0232680
116
 M14_2-Me-4-(3,5-tBu)Ph
C    -1.6603870   -2.1290300    1.6004460
C    -1.7924950   -1.3211370    2.8044740
H     0.1345520   -3.2041670    0.7706290
C    -0.5150740   -1.3123630    3.5100400
C     0.3757200   -2.1495570    2.7224700
C    -0.3055310   -2.5852760    1.5525680
C    -0.3757200    2.1495570    2.7224700
C     0.3055310    2.5852760    1.5525680
C     1.6603870    2.1290300    1.6004460
C     1.7924950    1.3211370    2.8044740
C     0.5150740    1.3123630    3.5100400
C    -2.7763280   -2.3461990    0.7233500
C    -3.9804170   -1.7372530    1.0680360
H    -5.1094740   -0.5465500    2.4938770
C    -4.1256590   -0.9623400    2.2525920
C    -3.0644300   -0.7493430    3.1167920
C     3.0644300    0.7493430    3.1167920
H     5.1094740    0.5465500    2.4938770
C     4.1256590    0.9623400    2.2525920
C     3.9804170    1.7372530    1.0680360
C     2.7763280    2.3461990    0.7233500
H    -0.1345520    3.2041670    0.7706290
Si    0.0000000    0.0000000    4.7898980
C     1.3910630   -0.5737920    5.9494700
H     0.9583910   -1.2659490    6.6972150
H     1.8065790    0.2938340    6.4960000
H     2.2215820   -1.1001590    5.4530390
Zr    0.0000000    0.0000000    1.4503650
C     1.7806780   -2.5968190    3.0560180
H     2.2214360   -3.1250240    2.1956540
H     2.4541550   -1.7638640    3.3102960
H     1.7600980   -3.2910460    3.9171370
C    -1.7806780    2.5968190    3.0560180
H    -2.4541550    1.7638640    3.3102960
H    -1.7600980    3.2910460    3.9171370
H    -2.2214360    3.1250240    2.1956540
H     4.8553130    1.8969710    0.4293360
H    -4.8553130   -1.8969710    0.4293360
C    -2.6609230   -3.1808330   -0.5032380
C    -3.1218270   -2.6810660   -1.7367290
C    -2.1161520   -4.4794230   -0.4530900
C    -3.0429900   -3.4485810   -2.9135810
H    -3.5157760   -1.6600690   -1.7661100
C    -2.0316670   -5.2827480   -1.6052480
H    -1.7827970   -4.8719100    0.5135710
C    -2.4972050   -4.7446840   -2.8223040
H    -2.4305530   -5.3522890   -3.7261370
C     2.6609230    3.1808330   -0.5032380
C     3.1218270    2.6810660   -1.7367290
C     2.1161520    4.4794230   -0.4530900
C     3.0429900    3.4485810   -2.9135810
H     3.5157760    1.6600690   -1.7661100
C     2.0316670    5.2827480   -1.6052480
H     1.7827970    4.8719100    0.5135710
C     2.4972050    4.7446840   -2.8223040
H     2.4305530    5.3522890   -3.7261370
C    -1.3910630    0.5737920    5.9494700
H    -1.8065790   -0.2938340    6.4960000
H    -0.9583910    1.2659490    6.6972150
H    -2.2215820    1.1001590    5.4530390
C     1.4479810    6.7094510   -1.5000370
C     0.0000000    6.6369790   -0.9487120
C     2.3215830    7.5517950   -0.5338410
C     1.4061300    7.4307510   -2.8647260
H    -0.6480700    6.0449100   -1.6197450
H    -0.0318180    6.1725240    0.0530140
H    -0.4275980    7.6535940   -0.8621900
H     3.3572020    7.6344820   -0.9102530
H     1.9070970    8.5727050   -0.4339790
H     2.3617630    7.1020160    0.4740360
H     0.9797040    8.4419080   -2.7345880
H     2.4156560    7.5468100   -3.2987160
H     0.7751040    6.8915960   -3.5941220
C     3.5338620    2.8474060   -4.2487490
C     5.0300700    2.4590650   -4.1210690
C     2.7010630    1.5793590   -4.5738510
C     3.3926870    3.8351650   -5.4270360
H     5.6507930    3.3464230   -3.9001400
H     5.1914720    1.7207080   -3.3160060
H     5.3902730    2.0118930   -5.0665710
H     1.6313050    1.8306630   -4.6883380
H     3.0534740    1.1238670   -5.5185270
H     2.7855390    0.8206260   -3.7764490
H     3.7610500    3.3585430   -6.3534820
H     2.3397190    4.1244570   -5.5960950
H     3.9836760    4.7550300   -5.2652500
C    -1.4479810   -6.7094510   -1.5000370
C     0.0000000   -6.6369790   -0.9487120
C    -2.3215830   -7.5517950   -0.5338410
C    -1.4061300   -7.4307510   -2.8647260
H     0.6480700   -6.0449100   -1.6197450
H     0.0318180   -6.1725240    0.0530140
H     0.4275980   -7.6535940   -0.8621900
H    -3.3572020   -7.6344820   -0.9102530
H    -1.9070970   -8.5727050   -0.4339790
H    -2.3617630   -7.1020160    0.4740360
H    -0.9797040   -8.4419080   -2.7345880
H    -2.4156560   -7.5468100   -3.2987160
H    -0.7751040   -6.8915960   -3.5941220
C    -3.5338620   -2.8474060   -4.2487490
C    -5.0300700   -2.4590650   -4.1210690
C    -2.7010630   -1.5793590   -4.5738510
C    -3.3926870   -3.8351650   -5.4270360
H    -5.6507930   -3.3464230   -3.9001400
H    -5.1914720   -1.7207080   -3.3160060
H    -5.3902730   -2.0118930   -5.0665710
H    -1.6313050   -1.8306630   -4.6883380
H    -3.0534740   -1.1238670   -5.5185270
H    -2.7855390   -0.8206260   -3.7764490
H    -3.7610500   -3.3585430   -6.3534820
H    -2.3397190   -4.1244570   -5.5960950
H    -3.9836760   -4.7550300   -5.2652500
Cl    1.7371200   -0.7048220   -0.0933420
Cl   -1.7371200    0.7048220   -0.0933420
H    -3.2143290   -0.1995670    4.0488500
H     3.2143290    0.1995670    4.0488500
68
 M15_2-Me-4-(3,5-F)Ph
C     0.0000000    2.6947490    0.7467850
C     0.6006740    2.1386790    1.9514590
H    -2.0797270    2.4399260   -0.0793820
C    -0.4024630    1.3498220    2.6591740
C    -1.6193950    1.4643730    1.8727030
C    -1.3492850    2.2234320    0.7001100
C     1.6193950   -1.4643730    1.8727030
C     1.3492850   -2.2234320    0.7001100
C     0.0000000   -2.6947490    0.7467850
C    -0.6006740   -2.1386790    1.9514590
C     0.4024630   -1.3498220    2.6591740
C     0.7542040    3.5444900   -0.1305900
H     2.6747310    4.4587950   -0.4296730
C     2.0793930    3.8003820    0.2109880
H     3.6995550    3.5543930    1.6385080
C     2.6674110    3.2807090    1.3975970
H     2.4108320    2.1263520    3.1960940
C     1.9563740    2.4658570    2.2624680
H    -2.4108320   -2.1263520    3.1960940
C    -1.9563740   -2.4658570    2.2624680
H    -3.6995550   -3.5543930    1.6385080
C    -2.6674110   -3.2807090    1.3975970
H    -2.6747310   -4.4587950   -0.4296730
C    -2.0793930   -3.8003820    0.2109880
C    -0.7542040   -3.5444900   -0.1305900
H     2.0797270   -2.4399260   -0.0793820
Si    0.0000000    0.0000000    3.9429030
C    -1.4452240   -0.4016440    5.1073550
H    -1.5325900    0.4195160    5.8444320
H    -1.2276410   -1.3315500    5.6659490
H    -2.4261850   -0.5130770    4.6194300
C     1.4452240    0.4016440    5.1073550
H     2.4261850    0.5130770    4.6194300
H     1.5325900   -0.4195160    5.8444320
H     1.2276410    1.3315500    5.6659490
Zr    0.0000000    0.0000000    0.5975130
C    -3.0064560    0.9682400    2.2099980
H    -3.4401580    1.5949390    3.0122230
H    -3.6591090    1.0385200    1.3254480
H    -3.0264250   -0.0765060    2.5544300
C     3.0064560   -0.9682400    2.2099980
H     3.4401580   -1.5949390    3.0122230
H     3.6591090   -1.0385200    1.3254480
H     3.0264250    0.0765060    2.5544300
C    -0.1575470   -4.1347010   -1.3585310
C     1.0867960   -4.8010580   -1.3135750
C    -0.8553320   -4.0517220   -2.5825560
C     1.5943490   -5.3661280   -2.4841460
H     1.6424600   -4.9116730   -0.3795830
C    -0.2951480   -4.6313090   -3.7220130
H    -1.8024540   -3.5128840   -2.6568130
C     0.9314430   -5.2997760   -3.7120830
C     0.1575470    4.1347010   -1.3585310
C     0.8553320    4.0517220   -2.5825560
C    -1.0867960    4.8010580   -1.3135750
C     0.2951480    4.6313090   -3.7220130
H     1.8024540    3.5128840   -2.6568130
C    -1.5943490    5.3661280   -2.4841460
H    -1.6424600    4.9116730   -0.3795830
C    -0.9314430    5.2997760   -3.7120830
Cl    1.7966430    0.5094110   -0.9508360
Cl   -1.7966430   -0.5094110   -0.9508360
H     1.3513800   -5.7437260   -4.6165030
H    -1.3513800    5.7437260   -4.6165030
F    -2.7867030    6.0195050   -2.4301950
F     0.9667330    4.5390710   -4.9000030
F    -0.9667330   -4.5390710   -4.9000030
F     2.7867030   -6.0195050   -2.4301950
68
 M16_2-Me-4-C6F5
C    -1.3136400    2.3694420    1.0320140
C    -0.5141580    2.1727350    2.2333370
H    -3.0151990    1.1407850    0.2150120
C    -1.0029550    0.9920740    2.9377350
C    -2.1227150    0.5023680    2.1523160
C    -2.2588050    1.3000960    0.9828990
C     2.1227150   -0.5023680    2.1523160
C     2.2588050   -1.3000960    0.9828990
C     1.3136400   -2.3694420    1.0320140
C     0.5141580   -2.1727350    2.2333370
C     1.0029550   -0.9920740    2.9377350
C    -1.0861390    3.5002120    0.1783560
H     0.1351310    5.2470740   -0.1085800
C    -0.0605070    4.3759480    0.5225550
H     1.4788160    4.9390070    1.9473250
C     0.7140190    4.1956630    1.7015760
H     1.0684570    3.0408110    3.4830630
C     0.5014340    3.1245190    2.5531080
H    -1.0684570   -3.0408110    3.4830630
C    -0.5014340   -3.1245190    2.5531080
H    -1.4788160   -4.9390070    1.9473250
C    -0.7140190   -4.1956630    1.7015760
H    -0.1351310   -5.2470740   -0.1085800
C     0.0605070   -4.3759480    0.5225550
C     1.0861390   -3.5002120    0.1783560
H     3.0151990   -1.1407850    0.2150120
Si    0.0000000    0.0000000    4.2184230
C    -1.0745580   -1.0540160    5.3754850
H    -1.5453610   -0.3848540    6.1209620
H    -0.4372140   -1.7724700    5.9247400
H    -1.8819860   -1.6159590    4.8800780
C     1.0745580    1.0540160    5.3754850
H     1.8819860    1.6159590    4.8800780
H     1.5453610    0.3848540    6.1209620
H     0.4372140    1.7724700    5.9247400
Zr    0.0000000    0.0000000    0.8792800
C    -3.0767700   -0.6240840    2.4768160
H    -3.6799710   -0.3639420    3.3662820
H    -3.7616180   -0.7900360    1.6304280
H    -2.5686590   -1.5802700    2.6781230
C     3.0767700    0.6240840    2.4768160
H     3.6799710    0.3639420    3.3662820
H     3.7616180    0.7900360    1.6304280
H     2.5686590    1.5802700    2.6781230
C     1.9174510   -3.7440950   -1.0308560
C     3.3254040   -3.7581710   -0.9834160
C     1.3421600   -4.0026040   -2.2919250
C     4.1195090   -3.9934830   -2.1106050
C     2.1123400   -4.2369010   -3.4365610
C     3.5087770   -4.2313310   -3.3467960
C    -1.9174510    3.7440950   -1.0308560
C    -1.3421600    4.0026040   -2.2919250
C    -3.3254040    3.7581710   -0.9834160
C    -2.1123400    4.2369010   -3.4365610
C    -4.1195090    3.9934830   -2.1106050
C    -3.5087770    4.2313310   -3.3467960
Cl    1.3307440    1.3160830   -0.6523900
Cl   -1.3307440   -1.3160830   -0.6523900
F    -4.2587410    4.4607030   -4.4396900
F     4.2587410   -4.4607030   -4.4396900
F     0.0000000   -4.0185590   -2.4390110
F     3.9659180   -3.5699190    0.1958980
F    -3.9659180    3.5699190    0.1958980
F     0.0000000    4.0185590   -2.4390110
F     5.4637180   -4.0073300   -2.0089610
F     1.5175840   -4.4646390   -4.6235240
F    -5.4637180    4.0073300   -2.0089610
F    -1.5175840    4.4646390   -4.6235240
54
 M17_2-Me-4-Br-SiEt2
C     0.0000000    2.6946290    0.2128270
C    -0.6117400    2.1515370   -0.9932830
H     2.0766370    2.4704520    1.0309830
C     0.3879910    1.3566800   -1.6988280
C     1.6093520    1.4709860   -0.9164100
C     1.3481280    2.2326240    0.2556830
C    -1.6093520   -1.4709860   -0.9164100
C    -1.3481280   -2.2326240    0.2556830
C     0.0000000   -2.6946290    0.2128270
C     0.6117400   -2.1515370   -0.9932830
C    -0.3879910   -1.3566800   -1.6988280
C    -0.7548930    3.5565430    1.0566780
H    -2.6367760    4.5427420    1.3846550
C    -2.0612130    3.8767960    0.7372290
H    -3.6775550    3.6481150   -0.6939690
C    -2.6512330    3.3550120   -0.4511520
H    -2.4250360    2.1724690   -2.2324300
C    -1.9594020    2.5114950   -1.3043980
H     2.4250360   -2.1724690   -2.2324300
C     1.9594020   -2.5114950   -1.3043980
H     3.6775550   -3.6481150   -0.6939690
C     2.6512330   -3.3550120   -0.4511520
H     2.6367760   -4.5427420    1.3846550
C     2.0612130   -3.8767960    0.7372290
C     0.7548930   -3.5565430    1.0566780
H    -2.0766370   -2.4704520    1.0309830
Si    0.0000000    0.0000000   -2.9856570
C     1.4876040   -0.3810340   -4.1227270
H     1.2685410   -1.3251750   -4.6604000
H     2.3925410   -0.5770420   -3.5221290
C    -1.4876040    0.3810340   -4.1227270
H    -2.3925410    0.5770420   -3.5221290
H    -1.2685410    1.3251750   -4.6604000
Zr    0.0000000    0.0000000    0.3665230
C     2.9902810    0.9536920   -1.2495370
H     3.3809180    1.4676040   -2.1473710
H     3.6762970    1.1523460   -0.4111410
H     3.0141930   -0.1304030   -1.4421090
C    -2.9902810   -0.9536920   -1.2495370
H    -3.3809180   -1.4676040   -2.1473710
H    -3.6762970   -1.1523460   -0.4111410
H    -3.0141930    0.1304030   -1.4421090
Cl   -1.8035130    0.5174590    1.8911470
Cl    1.8035130   -0.5174590    1.8911470
Br    0.0618690    4.2803770    2.6269050
Br   -0.0618690   -4.2803770    2.6269050
C     1.7862500    0.7498620   -5.1325450
H     2.6645410    0.5034280   -5.7563900
H     0.9352840    0.9245820   -5.8153590
H     1.9984490    1.7049300   -4.6175980
C    -1.7862500   -0.7498620   -5.1325450
H    -2.6645410   -0.5034280   -5.7563900
H    -0.9352840   -0.9245820   -5.8153590
H    -1.9984490   -1.7049300   -4.6175980
60
 M18_2,4-Me-SiEt2
C     0.7216820    2.5773680    0.7155150
C     0.0000000    2.2199390   -0.4948370
H     2.6668070    1.7857480    1.5311170
C     0.7534130    1.1907430   -1.2059550
C     1.9561210    0.9686780   -0.4190390
C     1.8997650    1.7685200    0.7560820
C    -1.9561210   -0.9686780   -0.4190390
C    -1.8997650   -1.7685200    0.7560820
C    -0.7216820   -2.5773680    0.7155150
C     0.0000000   -2.2199390   -0.4948370
C    -0.7534130   -1.1907430   -1.2059550
C     0.2489670    3.6004950    1.6005130
H    -1.3099140    5.0467260    1.8878230
C    -0.9220580    4.2515590    1.2413960
H    -2.5410260    4.4894670   -0.1938250
C    -1.6345150    3.9256560    0.0500650
H    -1.7459580    2.7270920   -1.7334240
C    -1.2036570    2.9272040   -0.8066370
H     1.7459580   -2.7270920   -1.7334240
C     1.2036570   -2.9272040   -0.8066370
H     2.5410260   -4.4894670   -0.1938250
C     1.6345150   -3.9256560    0.0500650
H     1.3099140   -5.0467260    1.8878230
C     0.9220580   -4.2515590    1.2413960
C    -0.2489670   -3.6004950    1.6005130
H    -2.6668070   -1.7857480    1.5311170
Si    0.0000000    0.0000000   -2.4923580
C     1.3055550   -0.7956090   -3.6397880
H     1.7076460    0.0282850   -4.2643480
H     2.1691660   -1.1621310   -3.0578730
C    -1.3055550    0.7956090   -3.6397880
H    -2.1691660    1.1621310   -3.0578730
H    -1.7076460   -0.0282850   -4.2643480
Zr    0.0000000    0.0000000    0.8567780
C     3.1511880    0.1057620   -0.7548270
H     3.6784820    0.5167240   -1.6358930
H     3.8537440    0.0910680    0.0935630
H     2.8852490   -0.9392610   -0.9777130
C    -3.1511880   -0.1057620   -0.7548270
H    -3.6784820   -0.5167240   -1.6358930
H    -3.8537440   -0.0910680    0.0935630
H    -2.8852490    0.9392610   -0.9777130
Cl   -1.5819240    0.9705870    2.4267090
Cl    1.5819240   -0.9705870    2.4267090
C     1.0041080    3.9241450    2.8638860
H     2.0564420    4.1898590    2.6490590
H     0.5373800    4.7652980    3.4021000
H     1.0194210    3.0476370    3.5394130
C    -1.0041080   -3.9241450    2.8638860
H    -1.0194210   -3.0476370    3.5394130
H    -2.0564420   -4.1898590    2.6490590
H    -0.5373800   -4.7652980    3.4021000
C    -0.7617670    1.9221500   -4.5452840
H     0.0589420    1.5644250   -5.1932760
H    -1.5534520    2.3192380   -5.2067680
H    -0.3680330    2.7659140   -3.9495800
C     0.7617670   -1.9221500   -4.5452840
H    -0.0589420   -1.5644250   -5.1932760
H     1.5534520   -2.3192380   -5.2067680
H     0.3680330   -2.7659140   -3.9495800
74
 M19_2-Me-4-(2-Me)Ph
C    -1.2744630    2.3828950    0.3806280
C    -0.4774850    2.1757170    1.5800980
H    -2.9891560    1.1891280   -0.4489020
C    -0.9882570    1.0051590    2.2871680
C    -2.1185720    0.5325680    1.5026930
C    -2.2423660    1.3323990    0.3331140
C     2.1185720   -0.5325680    1.5026930
C     2.2423660   -1.3323990    0.3331140
C     1.2744630   -2.3828950    0.3806280
C     0.4774850   -2.1757170    1.5800980
C     0.9882570   -1.0051590    2.2871680
C    -1.0428900    3.4990450   -0.4883390
C     0.0000000    4.3566180   -0.1551740
H     1.5632650    4.9020940    1.2563150
C     0.7823170    4.1713070    1.0217380
H     1.1314370    3.0274340    2.8119190
C     0.5586040    3.1119630    1.8853710
H    -1.1314370   -3.0274340    2.8119190
C    -0.5586040   -3.1119630    1.8853710
H    -1.5632650   -4.9020940    1.2563150
C    -0.7823170   -4.1713070    1.0217380
C     0.0000000   -4.3566180   -0.1551740
C     1.0428900   -3.4990450   -0.4883390
H     2.9891560   -1.1891280   -0.4489020
Si    0.0000000    0.0000000    3.5673800
C    -1.0897310   -1.0381730    4.7260300
H    -1.5539480   -0.3609310    5.4684670
H    -0.4638390   -1.7638960    5.2789250
H    -1.9024600   -1.5906700    4.2286620
Zr    0.0000000    0.0000000    0.2293870
C    -3.0966040   -0.5699760    1.8387690
H    -3.7607410   -0.7579910    0.9803580
H    -2.6083970   -1.5237720    2.0916130
H    -3.7198950   -0.2693470    2.7018560
C     3.0966040    0.5699760    1.8387690
H     2.6083970    1.5237720    2.0916130
H     3.7198950    0.2693470    2.7018560
H     3.7607410    0.7579910    0.9803580
H    -0.2009690   -5.2207260   -0.7969740
H     0.2009690    5.2207260   -0.7969740
C    -1.8864150    3.7293070   -1.7023000
C    -1.3121230    3.5437380   -2.9763570
C    -3.2385430    4.1520780   -1.5945280
C    -2.0607260    3.7537510   -4.1424740
C    -3.9699550    4.3612020   -2.7788710
C    -3.3972490    4.1613100   -4.0427410
C     1.8864150   -3.7293070   -1.7023000
C     1.3121230   -3.5437380   -2.9763570
C     3.2385430   -4.1520780   -1.5945280
C     2.0607260   -3.7537510   -4.1424740
C     3.9699550   -4.3612020   -2.7788710
C     3.3972490   -4.1613100   -4.0427410
C     1.0897310    1.0381730    4.7260300
H     0.4638390    1.7638960    5.2789250
H     1.5539480    0.3609310    5.4684670
H     1.9024600    1.5906700    4.2286620
C    -3.8852610    4.4145230   -0.2493650
H    -4.0981710    3.4752030    0.2950780
H    -3.2276220    5.0174350    0.4021390
H    -4.8397080    4.9533900   -0.3746550
C     3.8852610   -4.4145230   -0.2493650
H     4.0981710   -3.4752030    0.2950780
H     3.2276220   -5.0174350    0.4021390
H     4.8397080   -4.9533900   -0.3746550
H     5.0108110   -4.6985420   -2.7033850
H     1.5990710   -3.5966520   -5.1229820
H    -1.5990710    3.5966520   -5.1229820
H    -5.0108110    4.6985420   -2.7033850
Cl   -1.3579490   -1.2999840   -1.3055860
Cl    1.3579490    1.2999840   -1.3055860
H     3.9939100   -4.3310090   -4.9456440
H     0.2705880   -3.2135570   -3.0399760
H    -0.2705880    3.2135570   -3.0399760
H    -3.9939100    4.3310090   -4.9456440
74
 M20_2,5-Me-4-Ph
C    -0.0285780    2.6996980    0.4278940
C     0.5765910    2.1467110    1.6269250
H    -2.1040770    2.4350320   -0.3989900
C    -0.4167610    1.3462580    2.3358870
C    -1.6350100    1.4470900    1.5487470
C    -1.3731280    2.2140510    0.3792800
C     1.6350100   -1.4470900    1.5487470
C     1.3731280   -2.2140510    0.3792800
C     0.0285780   -2.6996980    0.4278940
C    -0.5765910   -2.1467110    1.6269250
C     0.4167610   -1.3462580    2.3358870
C     0.6913780    3.5758060   -0.4518610
C     2.0144900    3.8919130   -0.1272040
H     3.6220040    3.6582010    1.3155520
C     2.5978340    3.3562000    1.0678210
H     2.4010990    2.1794660    2.8547220
C     1.9241210    2.5109580    1.9291320
H    -2.4010990   -2.1794660    2.8547220
C    -1.9241210   -2.5109580    1.9291320
H    -3.6220040   -3.6582010    1.3155520
C    -2.5978340   -3.3562000    1.0678210
C    -2.0144900   -3.8919130   -0.1272040
C    -0.6913780   -3.5758060   -0.4518610
H     2.1040770   -2.4350320   -0.3989900
Si    0.0000000    0.0000000    3.6153240
C    -1.4455370   -0.4243850    4.7720930
H    -1.5523350    0.3909310    5.5131740
H    -1.2219280   -1.3553860    5.3265110
H    -2.4188550   -0.5457740    4.2708630
C     1.4455370    0.4243850    4.7720930
H     2.4188550    0.5457740    4.2708630
H     1.5523350   -0.3909310    5.5131740
H     1.2219280    1.3553860    5.3265110
Zr    0.0000000    0.0000000    0.2798610
C    -3.0120080    0.9191800    1.8812410
H    -3.4282920    1.4696590    2.7458550
H    -3.6866200    1.0620750    1.0222450
H    -3.0191040   -0.1535600    2.1291860
C     3.0120080   -0.9191800    1.8812410
H     3.4282920   -1.4696590    2.7458550
H     3.6866200   -1.0620750    1.0222450
H     3.0191040    0.1535600    2.1291860
C     0.0000000   -4.1176880   -1.6615020
C     1.1207880   -4.9655310   -1.5275050
C    -0.4406420   -3.7814740   -2.9591140
C     1.7752130   -5.4726320   -2.6589610
H     1.4698100   -5.2392310   -0.5256480
C     0.2194530   -4.2835840   -4.0897030
H    -1.2924410   -3.1041090   -3.0742580
C     1.3268980   -5.1322260   -3.9441480
H     2.6373680   -6.1372130   -2.5356370
H    -0.1313030   -4.0050860   -5.0893110
C     0.0000000    4.1176880   -1.6615020
C     0.4406420    3.7814740   -2.9591140
C    -1.1207880    4.9655310   -1.5275050
C    -0.2194530    4.2835840   -4.0897030
H     1.2924410    3.1041090   -3.0742580
C    -1.7752130    5.4726320   -2.6589610
H    -1.4698100    5.2392310   -0.5256480
C    -1.3268980    5.1322260   -3.9441480
H     0.1313030    4.0050860   -5.0893110
H    -2.6373680    6.1372130   -2.5356370
Cl    1.8010350    0.5350850   -1.2634130
Cl   -1.8010350   -0.5350850   -1.2634130
C    -2.8623530   -4.8165950   -0.9758260
H    -3.5217140   -4.2365740   -1.6496690
H    -2.2467680   -5.4799360   -1.6036040
H    -3.5153950   -5.4389980   -0.3382580
C     2.8623530    4.8165950   -0.9758260
H     3.5217140    4.2365740   -1.6496690
H     2.2467680    5.4799360   -1.6036040
H     3.5153950    5.4389980   -0.3382580
H    -1.8402180    5.5249800   -4.8283820
H     1.8402180   -5.5249800   -4.8283820
74
 M21_2,3-Me-4-Ph
C    -1.3280160    2.3463830    0.3861750
C    -0.5019960    2.1279840    1.5694470
C    -1.0160500    0.9750340    2.2993550
C    -2.1540630    0.5066400    1.5314520
C    -2.3217600    1.3024700    0.3539050
C     2.1540630   -0.5066400    1.5314520
C     2.3217600   -1.3024700    0.3539050
C     1.3280160   -2.3463830    0.3861750
C     0.5019960   -2.1279840    1.5694470
C     1.0160500   -0.9750340    2.2993550
C    -1.0770840    3.4761330   -0.4677560
H     0.2005740    5.1649050   -0.7938080
C     0.0000000    4.2991030   -0.1543330
H     1.6369630    4.7749000    1.1985390
C     0.8196750    4.0778850    0.9870560
H     1.1900170    2.8900800    2.7404000
C     0.5821770    3.0182230    1.8434530
H    -1.1900170   -2.8900800    2.7404000
C    -0.5821770   -3.0182230    1.8434530
H    -1.6369630   -4.7749000    1.1985390
C    -0.8196750   -4.0778850    0.9870560
H    -0.2005740   -5.1649050   -0.7938080
C     0.0000000   -4.2991030   -0.1543330
C     1.0770840   -3.4761330   -0.4677560
Si    0.0000000    0.0000000    3.5819900
C    -1.0004850   -1.0838440    4.7854260
H    -1.5911590   -0.4213910    5.4467760
H    -0.2895300   -1.6445230    5.4221640
H    -1.6939490   -1.8133130    4.3389660
C     1.0004850    1.0838440    4.7854260
H     1.6939490    1.8133130    4.3389660
H     1.5911590    0.4213910    5.4467760
H     0.2895300    1.6445230    5.4221640
Zr    0.0000000    0.0000000    0.2528030
C    -3.1243220   -0.5905510    1.9043240
H    -4.1322420   -0.1566930    2.0467450
H    -3.2036460   -1.3570090    1.1137160
H    -2.8428430   -1.0855930    2.8432710
C     3.1243220    0.5905510    1.9043240
H     4.1322420    0.1566930    2.0467450
H     3.2036460    1.3570090    1.1137160
H     2.8428430    1.0855930    2.8432710
C     1.9276490   -3.8173580   -1.6510010
C     3.2243750   -4.3466900   -1.4825990
C     1.4190410   -3.6677690   -2.9577120
C     3.9962600   -4.7117890   -2.5942490
H     3.6225330   -4.4822350   -0.4710550
C     2.1957790   -4.0283250   -4.0690390
H     0.4163580   -3.2503170   -3.0933500
C     3.4852980   -4.5506210   -3.8914850
H     4.9991140   -5.1273390   -2.4465820
H     1.7902660   -3.8975870   -5.0781910
C    -1.9276490    3.8173580   -1.6510010
C    -1.4190410    3.6677690   -2.9577120
C    -3.2243750    4.3466900   -1.4825990
C    -2.1957790    4.0283250   -4.0690390
H    -0.4163580    3.2503170   -3.0933500
C    -3.9962600    4.7117890   -2.5942490
H    -3.6225330    4.4822350   -0.4710550
C    -3.4852980    4.5506210   -3.8914850
H    -1.7902660    3.8975870   -5.0781910
H    -4.9991140    5.1273390   -2.4465820
Cl    1.3076120    1.2981160   -1.3301600
Cl   -1.3076120   -1.2981160   -1.3301600
C    -3.4527280    1.1292840   -0.6248900
H    -4.3148870    1.7618730   -0.3359300
H    -3.1589150    1.4140840   -1.6458220
H    -3.7907130    0.0811310   -0.6482910
C     3.4527280   -1.1292840   -0.6248900
H     4.3148870   -1.7618730   -0.3359300
H     3.1589150   -1.4140840   -1.6458220
H     3.7907130   -0.0811310   -0.6482910
H     4.0898870   -4.8332500   -4.7599870
H    -4.0898870    4.8332500   -4.7599870
68
 M22_2-Me-4-furyl-SiEt2_frozen
C     0.0000000    2.6969250    0.0621620
C    -0.6035840    2.1510860   -1.1465120
C    -1.9528670    2.4905350   -1.4678930
C    -2.6592110    3.3180300   -0.6086850
C    -2.0756630    3.8383890    0.5737210
C    -0.7534890    3.5606270    0.9335710
C     1.3478300    2.2227570    0.0975930
C     1.6116410    1.4625600   -1.0755530
C     0.3922370    1.3558670   -1.8577850
H    -2.4045880    2.1523450   -2.4030120
H    -3.6878870    3.6002150   -0.8554360
H    -2.6656490    4.4974370    1.2153880
H     2.0885770    2.4207810    0.8703000
Si    0.0000000    0.0000000   -3.1427790
Zr    0.0000000    0.0000000    0.2054880
C     1.4869160   -0.3752400   -4.2846640
H     1.2723570   -1.3201800   -4.8227410
H     2.3943840   -0.5663480   -3.6864740
C    -1.4869160    0.3752400   -4.2846640
H    -1.2723570    1.3201800   -4.8227410
H    -2.3943840    0.5663480   -3.6864740
C     2.9935820    0.9456980   -1.4054810
H     3.0157680   -0.1350670   -1.6152050
H     3.3938390    1.4730180   -2.2915480
H     3.6739300    1.1278470   -0.5584290
C    -0.3922370   -1.3558670   -1.8577850
C     0.6035840   -2.1510860   -1.1465120
C    -1.6116410   -1.4625600   -1.0755530
C     0.0000000   -2.6969250    0.0621620
C     1.9528670   -2.4905350   -1.4678930
C    -1.3478300   -2.2227570    0.0975930
C     0.7534890   -3.5606270    0.9335710
C     2.6592110   -3.3180300   -0.6086850
H     2.4045880   -2.1523450   -2.4030120
H    -2.0885770   -2.4207810    0.8703000
C     2.0756630   -3.8383890    0.5737210
H     3.6878870   -3.6002150   -0.8554360
H     2.6656490   -4.4974370    1.2153880
C    -2.9935820   -0.9456980   -1.4054810
H    -3.3938390   -1.4730180   -2.2915480
H    -3.6739300   -1.1278470   -0.5584290
H    -3.0157680    0.1350670   -1.6152050
C     0.1793920   -4.1596780    2.1294600
C    -1.1014380   -4.3764520    2.6087370
O     1.0892330   -4.6754730    3.0391380
C    -0.9726730   -5.0561920    3.8616080
H    -2.0331530   -4.1106370    2.1146620
C     0.3727640   -5.2106210    4.0748230
H    -1.7766630   -5.3853570    4.5192580
H     0.9678260   -5.6450530    4.8752040
C    -0.1793920    4.1596780    2.1294600
C     1.1014380    4.3764520    2.6087370
O    -1.0892330    4.6754730    3.0391380
C     0.9726730    5.0561920    3.8616080
H     2.0331530    4.1106370    2.1146620
C    -0.3727640    5.2106210    4.0748230
H     1.7766630    5.3853570    4.5192580
H    -0.9678260    5.6450530    4.8752040
Cl   -1.8000650    0.5119420    1.7459830
Cl    1.8000650   -0.5119420    1.7459830
C     1.7776750    0.7580830   -5.2940500
H     2.6572360    0.5182140   -5.9189560
H     0.9251930    0.9283030   -5.9762300
H     1.9839210    1.7140460   -4.7782120
C    -1.7776750   -0.7580830   -5.2940500
H    -2.6572360   -0.5182140   -5.9189560
H    -0.9251930   -0.9283030   -5.9762300
H    -1.9839210   -1.7140460   -4.7782120
74
 M23_2,6-Me-4-Ph
C    -0.1795930    2.6904060    0.3129400
C     0.4588730    2.1804690    1.5153100
H    -2.2368970    2.2975250   -0.5135240
C    -0.4862390    1.3231950    2.2230190
C    -1.7100990    1.3513600    1.4367240
C    -1.4944550    2.1299700    0.2666990
C     1.7100990   -1.3513600    1.4367240
C     1.4944550   -2.1299700    0.2666990
C     0.1795930   -2.6904060    0.3129400
C    -0.4588730   -2.1804690    1.5153100
C     0.4862390   -1.3231950    2.2230190
C     0.5153260    3.5955020   -0.5588410
C     1.8167120    3.9390260   -0.2103580
C     2.4615290    3.4662820    0.9759440
H     2.2604470    2.2872170    2.7629670
C     1.7890340    2.6001060    1.8273060
H    -2.2604470   -2.2872170    2.7629670
C    -1.7890340   -2.6001060    1.8273060
C    -2.4615290   -3.4662820    0.9759440
C    -1.8167120   -3.9390260   -0.2103580
C    -0.5153260   -3.5955020   -0.5588410
H     2.2368970   -2.2975250   -0.5135240
Si    0.0000000    0.0000000    3.5029370
C    -1.4206570   -0.4925710    4.6640850
H    -1.5595260    0.3157860    5.4075120
H    -1.1525400   -1.4135260    5.2155530
H    -2.3902990   -0.6563840    4.1680620
Zr    0.0000000    0.0000000    0.1635920
C    -3.0554940    0.7494650    1.7725520
H    -3.7371670    0.8507830    0.9131290
H    -3.0025340   -0.3206950    2.0257010
H    -3.5015780    1.2805540    2.6344730
C     3.0554940   -0.7494650    1.7725520
H     3.0025340    0.3206950    2.0257010
H     3.5015780   -1.2805540    2.6344730
H     3.7371670   -0.8507830    0.9131290
C    -0.1184790    4.1513850   -1.7841750
C     0.5751330    4.1316590   -3.0142200
C    -1.4049080    4.7338980   -1.7470270
C     0.0000000    4.6775940   -4.1693820
H     1.5599250    3.6561500   -3.0622020
C    -1.9756840    5.2845260   -2.9020320
H    -1.9479470    4.7817930   -0.7972810
C    -1.2766850    5.2567770   -4.1183050
H     0.5490560    4.6411620   -5.1164580
H    -2.9694750    5.7424640   -2.8501410
C     0.1184790   -4.1513850   -1.7841750
C    -0.5751330   -4.1316590   -3.0142200
C     1.4049080   -4.7338980   -1.7470270
C     0.0000000   -4.6775940   -4.1693820
H    -1.5599250   -3.6561500   -3.0622020
C     1.9756840   -5.2845260   -2.9020320
H     1.9479470   -4.7817930   -0.7972810
C     1.2766850   -5.2567770   -4.1183050
H    -0.5490560   -4.6411620   -5.1164580
H     2.9694750   -5.7424640   -2.8501410
C     1.4206570    0.4925710    4.6640850
H     1.1525400    1.4135260    5.2155530
H     1.5595260   -0.3157860    5.4075120
H     2.3902990    0.6563840    4.1680620
H     1.7256420   -5.6823950   -5.0219700
H    -1.7256420    5.6823950   -5.0219700
H    -2.3611760   -4.6421700   -0.8510430
H     2.3611760    4.6421700   -0.8510430
C     3.8642930    3.9401450    1.2877070
C    -3.8642930   -3.9401450    1.2877070
Cl   -1.7667780   -0.6318620   -1.3799710
Cl    1.7667780    0.6318620   -1.3799710
H    -3.9184000   -5.0437770    1.3127690
H    -4.5751460   -3.5983310    0.5109000
H    -4.2134030   -3.5559190    2.2609920
H     4.2134030    3.5559190    2.2609920
H     3.9184000    5.0437770    1.3127690
H     4.5751460    3.5983310    0.5109000
86
 M24_2-Me-4-Ph-6-iPr
C    -0.7304560    2.5968200    0.2378010
C     0.0000000    2.2293660    1.4397640
H    -2.6621690    1.7872250   -0.5888720
C    -0.7477790    1.1952550    2.1478670
C    -1.9513310    0.9710120    1.3619190
C    -1.9010190    1.7766520    0.1912500
C     1.9513310   -0.9710120    1.3619190
C     1.9010190   -1.7766520    0.1912500
C     0.7304560   -2.5968200    0.2378010
C     0.0000000   -2.2293660    1.4397640
C     0.7477790   -1.1952550    2.1478670
C    -0.2366550    3.6261480   -0.6324650
C     0.9644240    4.2345140   -0.2829010
C     1.6936100    3.9065680    0.9036190
H     1.7419790    2.7053550    2.6853950
C     1.2140310    2.9157130    1.7507630
H    -1.7419790   -2.7053550    2.6853950
C    -1.2140310   -2.9157130    1.7507630
C    -1.6936100   -3.9065680    0.9036190
C    -0.9644240   -4.2345140   -0.2829010
C     0.2366550   -3.6261480   -0.6324650
H     2.6621690   -1.7872250   -0.5888720
Si    0.0000000    0.0000000    3.4277250
C    -1.2880530   -0.7751500    4.5891670
H    -1.5919870   -0.0124070    5.3316070
H    -0.8347180   -1.6197550    5.1417040
H    -2.2021130   -1.1374520    4.0931960
Zr    0.0000000    0.0000000    0.0890480
C    -3.1452160    0.1074980    1.6994030
H    -3.8259240    0.0531340    0.8348890
H    -2.8739280   -0.9242780    1.9706900
H    -3.6990180    0.5469320    2.5504990
C     3.1452160   -0.1074980    1.6994030
H     2.8739280    0.9242780    1.9706900
H     3.6990180   -0.5469320    2.5504990
H     3.8259240   -0.0531340    0.8348890
C    -0.9693640    4.0363250   -1.8602870
C    -0.2843200    4.1547160   -3.0896750
C    -2.3479560    4.3427340   -1.8267820
C    -0.9570500    4.5668800   -4.2476080
H     0.7770230    3.8905730   -3.1348250
C    -3.0173840    4.7605640   -2.9845400
H    -2.8910240    4.2814410   -0.8777960
C    -2.3253740    4.8723060   -4.2000450
H    -0.4105490    4.6401840   -5.1940330
H    -4.0840560    5.0052020   -2.9354840
C     0.9693640   -4.0363250   -1.8602870
C     0.2843200   -4.1547160   -3.0896750
C     2.3479560   -4.3427340   -1.8267820
C     0.9570500   -4.5668800   -4.2476080
H    -0.7770230   -3.8905730   -3.1348250
C     3.0173840   -4.7605640   -2.9845400
H     2.8910240   -4.2814410   -0.8777960
C     2.3253740   -4.8723060   -4.2000450
H     0.4105490   -4.6401840   -5.1940330
H     4.0840560   -5.0052020   -2.9354840
C     1.2880530    0.7751500    4.5891670
H     0.8347180    1.6197550    5.1417040
H     1.5919870    0.0124070    5.3316070
H     2.2021130    1.1374520    4.0931960
H     2.8505540   -5.1938700   -5.1057080
H    -2.8505540    5.1938700   -5.1057080
H    -1.3435510   -5.0337790   -0.9290740
H     1.3435510    5.0337790   -0.9290740
C     2.9749730    4.6624780    1.2475910
C     2.7094610    6.1661330    1.4822320
C     4.0648350    4.4530390    0.1728690
H     2.3340070    6.6548820    0.5640760
H     1.9598540    6.3198320    2.2787470
H     3.6420340    6.6807360    1.7789340
H     5.0026610    4.9561660    0.4727780
H     4.2750610    3.3798460    0.0214480
H     3.7531900    4.8753580   -0.8002950
C    -2.9749730   -4.6624780    1.2475910
C    -2.7094610   -6.1661330    1.4822320
C    -4.0648350   -4.4530390    0.1728690
H    -2.3340070   -6.6548820    0.5640760
H    -1.9598540   -6.3198320    2.2787470
H    -3.6420340   -6.6807360    1.7789340
H    -5.0026610   -4.9561660    0.4727780
H    -4.2750610   -3.3798460    0.0214480
H    -3.7531900   -4.8753580   -0.8002950
H    -3.3529230   -4.2361800    2.1970950
H     3.3529230    4.2361800    2.1970950
Cl   -1.5988630   -0.9818610   -1.4546860
Cl    1.5988630    0.9818610   -1.4546860
92
 M25_2-Me-4-Ph-6-tBu
C     0.7311950    2.5979380   -0.1350680
C     0.0000000    2.2342310   -1.3354480
H     2.6617220    1.7861130    0.6922630
C     0.7453020    1.1976420   -2.0440170
C     1.9487190    0.9712390   -1.2587680
C     1.9001840    1.7763430   -0.0874890
C    -1.9487190   -0.9712390   -1.2587680
C    -1.9001840   -1.7763430   -0.0874890
C    -0.7311950   -2.5979380   -0.1350680
C     0.0000000   -2.2342310   -1.3354480
C    -0.7453020   -1.1976420   -2.0440170
C     0.2355560    3.6285720    0.7312830
C    -0.9597700    4.2408260    0.3729950
C    -1.6916120    3.9241430   -0.8187160
H    -1.7167700    2.7004230   -2.5961660
C    -1.2099640    2.9253830   -1.6568520
H     1.7167700   -2.7004230   -2.5961660
C     1.2099640   -2.9253830   -1.6568520
C     1.6916120   -3.9241430   -0.8187160
C     0.9597700   -4.2408260    0.3729950
C    -0.2355560   -3.6285720    0.7312830
H    -2.6617220   -1.7861130    0.6922630
Si    0.0000000    0.0000000   -3.3236300
C     1.2902270   -0.7711090   -4.4857310
H     1.5950340   -0.0060150   -5.2253570
H     0.8371210   -1.6136520   -5.0416520
H     2.2038550   -1.1356880   -3.9905700
Zr    0.0000000    0.0000000    0.0143010
C     3.1403020    0.1050320   -1.5967030
H     3.8229240    0.0519590   -0.7336420
H     2.8658410   -0.9271080   -1.8635850
H     3.6927900    0.5404620   -2.4506440
C    -3.1403020   -0.1050320   -1.5967030
H    -2.8658410    0.9271080   -1.8635850
H    -3.6927900   -0.5404620   -2.4506440
H    -3.8229240   -0.0519590   -0.7336420
C     0.9610170    4.0379250    1.9639060
C     0.2690170    4.1568310    3.1892920
C     2.3402400    4.3421710    1.9387590
C     0.9353520    4.5680770    4.3512800
H    -0.7928000    3.8936250    3.2282750
C     3.0034080    4.7587920    3.1005770
H     2.8889680    4.2800200    0.9930790
C     2.3043410    4.8716050    4.3119330
H     0.3833010    4.6419430    5.2944450
H     4.0707610    5.0016800    3.0579420
C    -0.9610170   -4.0379250    1.9639060
C    -0.2690170   -4.1568310    3.1892920
C    -2.3402400   -4.3421710    1.9387590
C    -0.9353520   -4.5680770    4.3512800
H     0.7928000   -3.8936250    3.2282750
C    -3.0034080   -4.7587920    3.1005770
H    -2.8889680   -4.2800200    0.9930790
C    -2.3043410   -4.8716050    4.3119330
H    -0.3833010   -4.6419430    5.2944450
H    -4.0707610   -5.0016800    3.0579420
C    -1.2902270    0.7711090   -4.4857310
H    -0.8371210    1.6136520   -5.0416520
H    -1.5950340    0.0060150   -5.2253570
H    -2.2038550    1.1356880   -3.9905700
H    -2.8249830   -5.1919930    5.2206270
H     2.8249830    5.1919930    5.2206270
H     1.3330370   -5.0408530    1.0209030
H    -1.3330370    5.0408530    1.0209030
C    -2.9699870    4.7276310   -1.1334400
C    -3.9944720    4.5275130    0.0145920
C    -3.6320820    4.2842590   -2.4554490
H    -4.2667910    3.4621780    0.1180300
H    -3.5920020    4.8680950    0.9846190
H    -4.9141670    5.1060910   -0.1924440
H    -4.5399730    4.8878050   -2.6342510
H    -2.9592550    4.4277770   -3.3203510
H    -3.9384500    3.2229360   -2.4247260
C     2.9699870   -4.7276310   -1.1334400
C     3.6320820   -4.2842590   -2.4554490
C     2.6185870   -6.2342710   -1.2530660
H     2.9592550   -4.4277770   -3.3203510
H     3.9384500   -3.2229360   -2.4247260
H     4.5399730   -4.8878050   -2.6342510
H     3.5320920   -6.8219020   -1.4616150
H     2.1710290   -6.6260450   -0.3228760
H     1.9006760   -6.4069650   -2.0751460
Cl    1.6008850   -0.9853150    1.5540590
Cl   -1.6008850    0.9853150    1.5540590
C     3.9944720   -4.5275130    0.0145920
H     4.2667910   -3.4621780    0.1180300
H     3.5920020   -4.8680950    0.9846190
H     4.9141670   -5.1060910   -0.1924440
C    -2.6185870    6.2342710   -1.2530660
H    -2.1710290    6.6260450   -0.3228760
H    -1.9006760    6.4069650   -2.0751460
H    -3.5320920    6.8219020   -1.4616150
88
 M26_2-Me-4-Ph-6-Ph
C    -1.3977620    2.3082100   -0.0407070
C    -1.6272920    1.5265460   -1.2453020
H     0.5113460    3.1686250    0.7855800
C    -0.3591440    1.3630880   -1.9505170
C     0.6244700    2.0913110   -1.1649220
C     0.0000000    2.6043000    0.0057830
C    -0.6244700   -2.0913110   -1.1649220
C     0.0000000   -2.6043000    0.0057830
C     1.3977620   -2.3082100   -0.0407070
C     1.6272920   -1.5265460   -1.2453020
C     0.3591440   -1.3630880   -1.9505170
C    -2.4867840    2.6441890    0.8318750
C    -3.7489480    2.1737720    0.4870030
C    -4.0067600    1.4193640   -0.7040320
H    -3.1495390    0.5558440   -2.4832930
C    -2.9518850    1.1038090   -1.5592760
H     3.1495390   -0.5558440   -2.4832930
C     2.9518850   -1.1038090   -1.5592760
C     4.0067600   -1.4193640   -0.7040320
C     3.7489480   -2.1737720    0.4870030
C     2.4867840   -2.6441890    0.8318750
H    -0.5113460   -3.1686250    0.7855800
Si    0.0000000    0.0000000   -3.2317010
C     1.4471580    0.4092770   -4.3919540
H     1.0968370    1.1484780   -5.1377220
H     1.7560140   -0.5002890   -4.9410750
H     2.3353270    0.8336970   -3.8977790
Zr    0.0000000    0.0000000    0.1093850
C     2.0711150    2.3725480   -1.4999750
H     2.5742520    2.8375200   -0.6375280
H     2.6414410    1.4691580   -1.7644910
H     2.1294310    3.0719270   -2.3551660
C    -2.0711150   -2.3725480   -1.4999750
H    -2.6414410   -1.4691580   -1.7644910
H    -2.1294310   -3.0719270   -2.3551660
H    -2.5742520   -2.8375200   -0.6375280
C    -2.2901980    3.4688480    2.0540080
C    -2.8423880    3.0548390    3.2860860
C    -1.5783980    4.6882270    2.0116010
C    -2.6873240    3.8361290    4.4387190
H    -3.3703660    2.0973670    3.3378620
C    -1.4299680    5.4710380    3.1640420
H    -1.1649190    5.0388240    1.0601130
C    -1.9817810    5.0472900    4.3825180
H    -3.1124170    3.4915560    5.3875200
H    -0.8851330    6.4197160    3.1084320
C     2.2901980   -3.4688480    2.0540080
C     2.8423880   -3.0548390    3.2860860
C     1.5783980   -4.6882270    2.0116010
C     2.6873240   -3.8361290    4.4387190
H     3.3703660   -2.0973670    3.3378620
C     1.4299680   -5.4710380    3.1640420
H     1.1649190   -5.0388240    1.0601130
C     1.9817810   -5.0472900    4.3825180
H     3.1124170   -3.4915560    5.3875200
H     0.8851330   -6.4197160    3.1084320
C    -1.4471580   -0.4092770   -4.3919540
H    -1.7560140    0.5002890   -4.9410750
H    -1.0968370   -1.1484780   -5.1377220
H    -2.3353270   -0.8336970   -3.8977790
H     1.8605960   -5.6573050    5.2840230
H    -1.8605960    5.6573050    5.2840230
H     4.5987870   -2.4509730    1.1189450
H    -4.5987870    2.4509730    1.1189450
Cl    1.8069690    0.4959500    1.6521140
Cl   -1.8069690   -0.4959500    1.6521140
C    -5.3980300    0.9991710   -1.0264900
C    -5.8774010    1.0173030   -2.3556710
C    -6.2761340    0.5645750   -0.0081850
C    -7.1834180    0.6100850   -2.6564040
H    -5.2259880    1.3811120   -3.1578290
C    -7.5818130    0.1562910   -0.3097670
H    -5.9201740    0.5199080    1.0263580
C    -8.0422910    0.1770650   -1.6348140
H    -7.5359710    0.6427370   -3.6930570
H    -8.2406650   -0.1868270    0.4951860
H    -9.0640860   -0.1392640   -1.8695380
C     5.3980300   -0.9991710   -1.0264900
C     6.2761340   -0.5645750   -0.0081850
C     5.8774010   -1.0173030   -2.3556710
C     7.5818130   -0.1562910   -0.3097670
H     5.9201740   -0.5199080    1.0263580
C     7.1834180   -0.6100850   -2.6564040
H     5.2259880   -1.3811120   -3.1578290
C     8.0422910   -0.1770650   -1.6348140
H     8.2406650    0.1868270    0.4951860
H     7.5359710   -0.6427370   -3.6930570
H     9.0640860    0.1392640   -1.8695380
106
 M27_2-Me-4-Ph-6-mesityl
C     0.0000000    2.7028310    0.1576470
C    -0.6008820    2.1522720   -1.0465840
H     2.0757640    2.4384450    0.9910510
C     0.3973700    1.3504250   -1.7480160
C     1.6143190    1.4585880   -0.9597590
C     1.3464480    2.2220950    0.2104370
C    -1.6143190   -1.4585880   -0.9597590
C    -1.3464480   -2.2220950    0.2104370
C     0.0000000   -2.7028310    0.1576470
C     0.6008820   -2.1522720   -1.0465840
C    -0.3973700   -1.3504250   -1.7480160
C    -0.7494310    3.5743960    1.0177510
C    -2.0589990    3.8665730    0.6451520
C    -2.6615220    3.3675380   -0.5542480
H    -2.3883230    2.1679670   -2.3187200
C    -1.9428820    2.5088440   -1.3808130
H     2.3883230   -2.1679670   -2.3187200
C     1.9428820   -2.5088440   -1.3808130
C     2.6615220   -3.3675380   -0.5542480
C     2.0589990   -3.8665730    0.6451520
C     0.7494310   -3.5743960    1.0177510
H    -2.0757640   -2.4384450    0.9910510
Si    0.0000000    0.0000000   -3.0310710
C     1.4518460   -0.3980740   -4.1887070
H     1.5421120    0.4206550   -4.9282290
H     1.2427630   -1.3309300   -4.7457360
H     2.4285410   -0.5045180   -3.6909780
Zr    0.0000000    0.0000000    0.3112900
C     2.9943620    0.9394990   -1.2932230
H     3.6719570    1.0973630   -0.4391600
H     3.0099550   -0.1350900   -1.5336000
H     3.4023700    1.4857980   -2.1642460
C    -2.9943620   -0.9394990   -1.2932230
H    -3.0099550    0.1350900   -1.5336000
H    -3.4023700   -1.4857980   -2.1642460
H    -3.6719570   -1.0973630   -0.4391600
C    -0.1597110    4.1650420    2.2490150
C    -0.8678840    4.1140890    3.4697660
C     1.0960810    4.8116290    2.2266880
C    -0.3360080    4.6905090    4.6307530
H    -1.8290500    3.5916890    3.5063290
C     1.6232570    5.3928510    3.3873900
H     1.6482170    4.8855370    1.2839040
C     0.9107240    5.3325490    4.5945800
C     0.1597110   -4.1650420    2.2490150
C     0.8678840   -4.1140890    3.4697660
C    -1.0960810   -4.8116290    2.2266880
C     0.3360080   -4.6905090    4.6307530
H     1.8290500   -3.5916890    3.5063290
C    -1.6232570   -5.3928510    3.3873900
H    -1.6482170   -4.8855370    1.2839040
C    -0.9107240   -5.3325490    4.5945800
C    -1.4518460    0.3980740   -4.1887070
H    -1.2427630    1.3309300   -4.7457360
H    -1.5421120   -0.4206550   -4.9282290
H    -2.4285410    0.5045180   -3.6909780
H    -1.3260110   -5.7823740    5.5026740
H     1.3260110    5.7823740    5.5026740
H     2.6395520   -4.5596500    1.2631720
H    -2.6395520    4.5596500    1.2631720
Cl    1.7884670   -0.5187350    1.8679590
Cl   -1.7884670    0.5187350    1.8679590
C    -4.0346230    3.8354860   -0.9482100
C    -4.1783580    4.7986650   -1.9823200
C    -5.1845190    3.3369740   -0.2865650
C    -5.4656460    5.2324260   -2.3406830
C    -6.4548180    3.7936260   -0.6848780
C    -6.6204400    4.7382820   -1.7093030
H    -5.5661080    5.9837800   -3.1345480
H    -7.3407550    3.3959540   -0.1734950
C     4.0346230   -3.8354860   -0.9482100
C     5.1845190   -3.3369740   -0.2865650
C     4.1783580   -4.7986650   -1.9823200
C     6.4548180   -3.7936260   -0.6848780
C     5.4656460   -5.2324260   -2.3406830
C     6.6204400   -4.7382820   -1.7093030
H     7.3407550   -3.3959540   -0.1734950
H     5.5661080   -5.9837800   -3.1345480
C    -5.0730130    2.3285510    0.8388550
H    -4.3554980    1.5245200    0.6031240
H    -4.7104590    2.8021660    1.7707390
H    -6.0555810    1.8760400    1.0557290
C    -2.9710860    5.3818540   -2.6923040
H    -2.1977140    5.7095610   -1.9749150
H    -2.4904820    4.6426450   -3.3600880
H    -3.2652130    6.2487980   -3.3079140
C    -7.9973040    5.2049160   -2.1339020
H    -8.7679570    4.8970350   -1.4069130
H    -8.0366230    6.3049900   -2.2323250
H    -8.2758600    4.7810390   -3.1180290
C     2.9710860   -5.3818540   -2.6923040
H     2.1977140   -5.7095610   -1.9749150
H     2.4904820   -4.6426450   -3.3600880
H     3.2652130   -6.2487980   -3.3079140
C     5.0730130   -2.3285510    0.8388550
H     4.3554980   -1.5245200    0.6031240
H     4.7104590   -2.8021660    1.7707390
H     6.0555810   -1.8760400    1.0557290
C     7.9973040   -5.2049160   -2.1339020
H     8.7679570   -4.8970350   -1.4069130
H     8.0366230   -6.3049900   -2.2323250
H     8.2758600   -4.7810390   -3.1180290
H     0.8953580   -4.6294440    5.5704930
H    -2.5930840   -5.9005310    3.3469810
H    -0.8953580    4.6294440    5.5704930
H     2.5930840    5.9005310    3.3469810
84
 M28_2,3,4-Me-6-tBu
C    -1.7170150   -2.0443110    0.4909200
C    -0.8926950   -2.0034300   -0.7057040
C    -1.1776500   -0.7722730   -1.4345690
C    -2.1987700   -0.0904790   -0.6612930
C    -2.5042080   -0.8372010    0.5206420
C     2.1987700    0.0904790   -0.6612930
C     2.5042080    0.8372010    0.5206420
C     1.7170150    2.0443110    0.4909200
C     0.8926950    2.0034300   -0.7057040
C     1.1776500    0.7722730   -1.4345690
C    -1.6659260   -3.1981780    1.3480370
C    -0.8259530   -4.2350540    0.9747090
C     0.0000000   -4.2221680   -0.1979090
H     0.5635670   -3.0676550   -1.9282260
C    -0.0279480   -3.1011180   -1.0141520
H    -0.5635670    3.0676550   -1.9282260
C     0.0279480    3.1011180   -1.0141520
C     0.0000000    4.2221680   -0.1979090
C     0.8259530    4.2350540    0.9747090
C     1.6659260    3.1981780    1.3480370
Si    0.0000000    0.0000000   -2.7182070
C    -0.7857560    1.2461840   -3.9247960
H    -1.4868590    0.7007970   -4.5851880
H     0.0158920    1.6658920   -4.5624410
H    -1.3346930    2.0912680   -3.4812390
Zr    0.0000000    0.0000000    0.6133190
C    -2.9462100    1.1678000   -1.0387750
H    -2.9068960    1.9258620   -0.2371010
H    -2.5523630    1.6169150   -1.9599730
H    -4.0113620    0.9260120   -1.2173640
C     2.9462100   -1.1678000   -1.0387750
H     2.5523630   -1.6169150   -1.9599730
H     4.0113620   -0.9260120   -1.2173640
H     2.9068960   -1.9258620   -0.2371010
C     0.7857560   -1.2461840   -3.9247960
H    -0.0158920   -1.6658920   -4.5624410
H     1.4868590   -0.7007970   -4.5851880
H     1.3346930   -2.0912680   -3.4812390
H     0.7951420    5.1166450    1.6252400
H    -0.7951420   -5.1166450    1.6252400
C     0.8729720   -5.4553430   -0.5038820
C    -0.0342010   -6.7045760   -0.6583480
C     1.8672820   -5.6840860    0.6651780
H    -0.6231260   -6.8981580    0.2554510
H    -0.7411500   -6.5762600   -1.4978990
H     0.5826540   -7.6006440   -0.8584940
H     2.4935900   -6.5732740    0.4631060
H     2.5309620   -4.8106860    0.7939500
H     1.3416010   -5.8500870    1.6216920
C    -0.8729720    5.4553430   -0.5038820
C     0.0342010    6.7045760   -0.6583480
C    -1.8672820    5.6840860    0.6651780
H     0.6231260    6.8981580    0.2554510
H     0.7411500    6.5762600   -1.4978990
H    -0.5826540    7.6006440   -0.8584940
H    -2.4935900    6.5732740    0.4631060
H    -2.5309620    4.8106860    0.7939500
H    -1.3416010    5.8500870    1.6216920
Cl   -1.0381980    1.5186100    2.2110480
Cl    1.0381980   -1.5186100    2.2110480
C    -1.6865350    5.2901670   -1.8052360
H    -1.0306210    5.1480490   -2.6833480
H    -2.3813750    4.4330070   -1.7468660
H    -2.2906470    6.1982370   -1.9818750
C     1.6865350   -5.2901670   -1.8052360
H     1.0306210   -5.1480490   -2.6833480
H     2.3813750   -4.4330070   -1.7468660
H     2.2906470   -6.1982370   -1.9818750
C    -2.4622740   -3.2949820    2.6280730
H    -2.1288350   -2.5302870    3.3542890
H    -3.5433920   -3.1446450    2.4595450
H    -2.3221340   -4.2852710    3.0924110
C     2.4622740    3.2949820    2.6280730
H     2.1288350    2.5302870    3.3542890
H     3.5433920    3.1446450    2.4595450
H     2.3221340    4.2852710    3.0924110
C    -3.5986970   -0.4684050    1.4891640
H    -4.5227430   -1.0354970    1.2609730
H    -3.3201680   -0.6760300    2.5327400
H    -3.8361380    0.6045880    1.4215110
C     3.5986970    0.4684050    1.4891640
H     4.5227430    1.0354970    1.2609730
H     3.3201680    0.6760300    2.5327400
H     3.8361380   -0.6045880    1.4215110
124
 M29_2-Me-4-(3,5-tBu)-Ph-7-OMe
C    -0.5740480   -2.6384020    1.3220010
C    -1.1038320   -1.9862370    2.5133120
H     1.5404770   -2.7963000    0.5854100
C     0.0000000   -1.4116910    3.2807810
C     1.2026620   -1.7621230    2.5337120
C     0.8396370   -2.4455300    1.3425940
C    -1.2026620    1.7621230    2.5337120
C    -0.8396370    2.4455300    1.3425940
C     0.5740480    2.6384020    1.3220010
C     1.1038320    1.9862370    2.5133120
C     0.0000000    1.4116910    3.2807810
C    -1.4184490   -3.3170040    0.3802000
C    -2.7774120   -3.3358200    0.6661690
H    -4.3897630   -2.8806710    2.0401190
C    -3.3194770   -2.7683790    1.8521320
C    -2.5112990   -2.1152810    2.7737560
C     2.5112990    2.1152810    2.7737560
H     4.3897630    2.8806710    2.0401190
C     3.3194770    2.7683790    1.8521320
C     2.7774120    3.3358200    0.6661690
C     1.4184490    3.3170040    0.3802000
H    -1.5404770    2.7963000    0.5854100
Si    0.0000000    0.0000000    4.5834190
C     1.4562670   -0.1583440    5.7942680
H     1.1740510   -0.9354100    6.5319590
H     1.5833420    0.7952950    6.3392830
H     2.4220050   -0.4334830    5.3513010
Zr    0.0000000    0.0000000    1.2174950
C     2.6491460   -1.5311250    2.9052820
H     3.2911360   -1.7065470    2.0270180
H     2.8451320   -0.5146260    3.2773620
H     2.9483240   -2.2416170    3.6996120
C    -2.6491460    1.5311250    2.9052820
H    -2.8451320    0.5146260    3.2773620
H    -2.9483240    2.2416170    3.6996120
H    -3.2911360    1.7065470    2.0270180
H     3.4589090    3.8508100   -0.0187120
H    -3.4589090   -3.8508100   -0.0187120
C    -0.8741140   -3.9593280   -0.8470930
C    -1.4317430   -3.6530040   -2.1035870
C     0.1855350   -4.8858450   -0.7799630
C    -0.9508360   -4.2483950   -3.2846950
H    -2.2328580   -2.9078600   -2.1441470
C     0.6896750   -5.5082150   -1.9369960
H     0.5997100   -5.1383320    0.2022070
C     0.1076710   -5.1723870   -3.1763280
H     0.4925400   -5.6411910   -4.0833580
C     0.8741140    3.9593280   -0.8470930
C     1.4317430    3.6530040   -2.1035870
C    -0.1855350    4.8858450   -0.7799630
C     0.9508360    4.2483950   -3.2846950
H     2.2328580    2.9078600   -2.1441470
C    -0.6896750    5.5082150   -1.9369960
H    -0.5997100    5.1383320    0.2022070
C    -0.1076710    5.1723870   -3.1763280
H    -0.4925400    5.6411910   -4.0833580
C    -1.4562670    0.1583440    5.7942680
H    -1.5833420   -0.7952950    6.3392830
H    -1.1740510    0.9354100    6.5319590
H    -2.4220050    0.4334830    5.3513010
C    -1.8437880    6.5280460   -1.8134760
C    -3.0701310    5.8432650   -1.1553100
C    -1.3874660    7.7181010   -0.9294470
C    -2.2851740    7.0874540   -3.1834370
H    -3.4199330    4.9911420   -1.7655350
H    -2.8312410    5.4638110   -0.1458150
H    -3.9036560    6.5640020   -1.0559800
H    -0.5235980    8.2367740   -1.3831110
H    -2.2100390    8.4494450   -0.8165950
H    -1.0902730    7.3834860    0.0802130
H    -3.1123210    7.8061650   -3.0395360
H    -1.4627670    7.6212370   -3.6930610
H    -2.6477670    6.2882000   -3.8547000
C     1.5740860    3.8564590   -4.6421600
C     3.0936680    4.1664770   -4.6224530
C     1.3639870    2.3376290   -4.8800650
C     0.9429790    4.6237090   -5.8241560
H     3.2743500    5.2454770   -4.4651550
H     3.6110880    3.6132720   -3.8190110
H     3.5553970    3.8752930   -5.5846800
H     0.2876040    2.0911630   -4.9170950
H     1.8226220    2.0350010   -5.8404920
H     1.8203280    1.7325520   -4.0774380
H     1.4272050    4.3112590   -6.7671610
H    -0.1379600    4.4147620   -5.9185030
H     1.0775370    5.7161840   -5.7236850
C     1.8437880   -6.5280460   -1.8134760
C     3.0701310   -5.8432650   -1.1553100
C     1.3874660   -7.7181010   -0.9294470
C     2.2851740   -7.0874540   -3.1834370
H     3.4199330   -4.9911420   -1.7655350
H     2.8312410   -5.4638110   -0.1458150
H     3.9036560   -6.5640020   -1.0559800
H     0.5235980   -8.2367740   -1.3831110
H     2.2100390   -8.4494450   -0.8165950
H     1.0902730   -7.3834860    0.0802130
H     3.1123210   -7.8061650   -3.0395360
H     1.4627670   -7.6212370   -3.6930610
H     2.6477670   -6.2882000   -3.8547000
C    -1.5740860   -3.8564590   -4.6421600
C    -3.0936680   -4.1664770   -4.6224530
C    -1.3639870   -2.3376290   -4.8800650
C    -0.9429790   -4.6237090   -5.8241560
H    -3.2743500   -5.2454770   -4.4651550
H    -3.6110880   -3.6132720   -3.8190110
H    -3.5553970   -3.8752930   -5.5846800
H    -0.2876040   -2.0911630   -4.9170950
H    -1.8226220   -2.0350010   -5.8404920
H    -1.8203280   -1.7325520   -4.0774380
H    -1.4272050   -4.3112590   -6.7671610
H     0.1379600   -4.4147620   -5.9185030
H    -1.0775370   -5.7161840   -5.7236850
Cl    1.8744550    0.0816240   -0.3307330
Cl   -1.8744550   -0.0816240   -0.3307330
O     2.9508290    1.6219120    3.9789410
O    -2.9508290   -1.6219120    3.9789410
C    -4.3250490   -1.8528070    4.3232120
H    -5.0076770   -1.3481350    3.6136060
H    -4.5470570   -2.9362150    4.3446930
H    -4.4492260   -1.4243690    5.3285530
C     4.3250490    1.8528070    4.3232120
H     5.0076770    1.3481350    3.6136060
H     4.5470570    2.9362150    4.3446930
H     4.4492260    1.4243690    5.3285530
100
 M30_2-Me-4-Ph-5-OMe-6tBu
C    -0.9590200    2.5418730    0.2334700
C    -0.1995250    2.2324330    1.4251520
H    -2.8026030    1.5595410   -0.6098040
C    -0.8496390    1.1295480    2.1316460
C    -2.0254160    0.8027770    1.3420500
C    -2.0437220    1.6115740    0.1708390
C     2.0254160   -0.8027770    1.3420500
C     2.0437220   -1.6115740    0.1708390
C     0.9590200   -2.5418730    0.2334700
C     0.1995250   -2.2324330    1.4251520
C     0.8496390   -1.1295480    2.1316460
C    -0.5754280    3.6212280   -0.6247950
C     0.5338800    4.3859150   -0.2459830
C     1.3329180    4.0917850    0.9277020
H     1.5011160    2.8125160    2.6452950
C     0.9486390    3.0221630    1.7297250
H    -1.5011160   -2.8125160    2.6452950
C    -0.9486390   -3.0221630    1.7297250
C    -1.3329180   -4.0917850    0.9277020
C    -0.5338800   -4.3859150   -0.2459830
C     0.5754280   -3.6212280   -0.6247950
H     2.8026030   -1.5595410   -0.6098040
Si    0.0000000    0.0000000    3.4077840
C    -1.2142280   -0.8864540    4.5696490
H    -1.5960330   -0.1515410    5.3040720
H    -0.6823510   -1.6776690    5.1312850
H    -2.0857480   -1.3429530    4.0742150
C     1.2142280    0.8864540    4.5696490
H     2.0857480    1.3429530    4.0742150
H     1.5960330    0.1515410    5.3040720
H     0.6823510    1.6776690    5.1312850
Zr    0.0000000    0.0000000    0.0820210
C    -3.1387380   -0.1629610    1.6749730
H    -3.7422010    0.2327700    2.5137360
H    -3.7995970   -0.2921880    0.8031530
H    -2.7750640   -1.1607360    1.9635930
C     3.1387380    0.1629610    1.6749730
H     3.7422010   -0.2327700    2.5137360
H     3.7995970    0.2921880    0.8031530
H     2.7750640    1.1607360    1.9635930
C     1.3182840   -3.8510200   -1.8987260
C     2.7127620   -4.0740510   -1.9032190
C     0.6346790   -3.8173330   -3.1338650
C     3.4042620   -4.2651580   -3.1079920
H     3.2537400   -4.1178930   -0.9516430
C     1.3293080   -4.0038410   -4.3363040
H    -0.4426430   -3.6322180   -3.1401150
C     2.7145350   -4.2299240   -4.3290270
H     4.4849030   -4.4442340   -3.0914840
H     0.7850020   -3.9658640   -5.2860860
C    -1.3182840    3.8510200   -1.8987260
C    -0.6346790    3.8173330   -3.1338650
C    -2.7127620    4.0740510   -1.9032190
C    -1.3293080    4.0038410   -4.3363040
H     0.4426430    3.6322180   -3.1401150
C    -3.4042620    4.2651580   -3.1079920
H    -3.2537400    4.1178930   -0.9516430
C    -2.7145350    4.2299240   -4.3290270
H    -0.7850020    3.9658640   -5.2860860
H    -4.4849030    4.4442340   -3.0914840
Cl    1.5058510    1.1391610   -1.4483860
Cl   -1.5058510   -1.1391610   -1.4483860
H    -3.2543920    4.3755790   -5.2708200
H     3.2543920   -4.3755790   -5.2708200
O    -0.9421600   -5.4623360   -1.0274600
C     0.0000000   -6.5489030   -1.1719150
H     0.3066090   -6.9301340   -0.1795070
H    -0.5456280   -7.3337200   -1.7188380
H     0.8912270   -6.2472950   -1.7474040
O     0.9421600    5.4623360   -1.0274600
C     0.0000000    6.5489030   -1.1719150
H    -0.3066090    6.9301340   -0.1795070
H     0.5456280    7.3337200   -1.7188380
H    -0.8912270    6.2472950   -1.7474040
C     2.5891290    4.9256120    1.2819260
C     3.2811550    4.4027740    2.5629760
C     3.6233390    4.8323300    0.1267620
C     2.2243370    6.4106280    1.5473390
H     2.6260280    4.4723910    3.4506760
H     3.6171980    3.3557730    2.4560770
H     4.1763450    5.0186720    2.7611970
H     3.2085760    5.2277290   -0.8127820
H     4.5266260    5.4153430    0.3888350
H     3.9254660    3.7825960   -0.0389340
H     3.1257630    6.9570720    1.8828730
H     1.8467160    6.9076720    0.6422610
H     1.4614330    6.4929470    2.3431870
C    -2.5891290   -4.9256120    1.2819260
C    -3.2811550   -4.4027740    2.5629760
C    -3.6233390   -4.8323300    0.1267620
C    -2.2243370   -6.4106280    1.5473390
H    -2.6260280   -4.4723910    3.4506760
H    -3.6171980   -3.3557730    2.4560770
H    -4.1763450   -5.0186720    2.7611970
H    -3.2085760   -5.2277290   -0.8127820
H    -4.5266260   -5.4153430    0.3888350
H    -3.9254660   -3.7825960   -0.0389340
H    -3.1257630   -6.9570720    1.8828730
H    -1.8467160   -6.9076720    0.6422610
H    -1.4614330   -6.4929470    2.3431870
72
 M31_2-Me-4-Br-6-tBu
C     1.2685120    2.3736640    0.1462790
C     0.4750480    2.1851560   -1.0562170
H     2.9934060    1.2010820    0.9727550
C     0.9832550    1.0113520   -1.7595900
C     2.1125900    0.5353540   -0.9755370
C     2.2408600    1.3325940    0.1951140
C    -2.1125900   -0.5353540   -0.9755370
C    -2.2408600   -1.3325940    0.1951140
C    -1.2685120   -2.3736640    0.1462790
C    -0.4750480   -2.1851560   -1.0562170
C    -0.9832550   -1.0113520   -1.7595900
C     0.9970770    3.4977350    0.9730430
C     0.0000000    4.3895540    0.6370630
C    -0.7835460    4.2280850   -0.5568850
H    -1.0950600    3.0209770   -2.3150540
C    -0.5447470    3.1339710   -1.3804650
H     1.0950600   -3.0209770   -2.3150540
C     0.5447470   -3.1339710   -1.3804650
C     0.7835460   -4.2280850   -0.5568850
C     0.0000000   -4.3895540    0.6370630
C    -0.9970770   -3.4977350    0.9730430
H    -2.9934060   -1.2010820    0.9727550
Si    0.0000000    0.0000000   -3.0413720
C     1.0975510   -1.0296360   -4.1997720
H     1.5674020   -0.3468520   -4.9333740
H     0.4737630   -1.7493950   -4.7627260
H     1.9059360   -1.5879140   -3.7021250
Zr    0.0000000    0.0000000    0.3046910
C     3.0883000   -0.5677600   -1.3146160
H     3.7544660   -0.7564700   -0.4579580
H     2.5960600   -1.5201360   -1.5656050
H     3.7096840   -0.2683810   -2.1793290
C    -3.0883000    0.5677600   -1.3146160
H    -2.5960600    1.5201360   -1.5656050
H    -3.7096840    0.2683810   -2.1793290
H    -3.7544660    0.7564700   -0.4579580
C    -1.0975510    1.0296360   -4.1997720
H    -0.4737630    1.7493950   -4.7627260
H    -1.5674020    0.3468520   -4.9333740
H    -1.9059360    1.5879140   -3.7021250
H     0.1804790   -5.2463510    1.2906100
H    -0.1804790    5.2463510    1.2906100
C    -1.8497030    5.2958990   -0.8760870
C    -1.1690790    6.6841830   -1.0059430
C    -2.8914950    5.3370530    0.2731710
H    -0.6455140    6.9736220   -0.0778840
H    -0.4310800    6.6862590   -1.8282420
H    -1.9282840    7.4592780   -1.2194830
H    -3.6572100    6.1063630    0.0614500
H    -3.3966270    4.3610880    0.3824020
H    -2.4230090    5.5841300    1.2418570
C     1.8497030   -5.2958990   -0.8760870
C     1.1690790   -6.6841830   -1.0059430
C     2.8914950   -5.3370530    0.2731710
H     0.6455140   -6.9736220   -0.0778840
H     0.4310800   -6.6862590   -1.8282420
H     1.9282840   -7.4592780   -1.2194830
H     3.6572100   -6.1063630    0.0614500
H     3.3966270   -4.3610880    0.3824020
H     2.4230090   -5.5841300    1.2418570
Cl    1.3487790   -1.3107280    1.8291140
Cl   -1.3487790    1.3107280    1.8291140
C     2.5933310   -5.0023600   -2.1960810
H     1.9056980   -4.9839670   -3.0609890
H     3.1314180   -4.0379440   -2.1568830
H     3.3417440   -5.7935610   -2.3804660
C    -2.5933310    5.0023600   -2.1960810
H    -1.9056980    4.9839670   -3.0609890
H    -3.1314180    4.0379440   -2.1568830
H    -3.3417440    5.7935610   -2.3804660
Br   -2.0431610   -3.7708510    2.5534570
Br    2.0431610    3.7708510    2.5534570
86
 M32_2-Me-4-thienyl-6-tBu
C    -1.2899310    2.3696410    0.1565530
C    -0.4974110    2.1782200    1.3580760
H    -2.9862340    1.1417260   -0.6728890
C    -0.9935150    1.0015560    2.0658450
C    -2.1148120    0.5125430    1.2801090
C    -2.2465200    1.3095660    0.1092190
C     2.1148120   -0.5125430    1.2801090
C     2.2465200   -1.3095660    0.1092190
C     1.2899310   -2.3696410    0.1565530
C     0.4974110   -2.1782200    1.3580760
C     0.9935150   -1.0015560    2.0658450
C    -1.0350060    3.4923290   -0.7047380
C     0.0000000    4.3516300   -0.3412380
C     0.7858290    4.1962970    0.8445410
H     1.0757090    3.0040180    2.6208410
C     0.5323540    3.1152920    1.6818340
H    -1.0757090   -3.0040180    2.6208410
C    -0.5323540   -3.1152920    1.6818340
C    -0.7858290   -4.1962970    0.8445410
C     0.0000000   -4.3516300   -0.3412380
C     1.0350060   -3.4923290   -0.7047380
H     2.9862340   -1.1417260   -0.6728890
Si    0.0000000    0.0000000    3.3458080
C    -1.0870100   -1.0369190    4.5087460
H    -1.5505600   -0.3576160    5.2496900
H    -0.4588160   -1.7596200    5.0630680
H    -1.8997570   -1.5927790    4.0154240
Zr    0.0000000    0.0000000    0.0046590
C    -3.0839580   -0.5971230    1.6162960
H    -3.7288740   -0.8092340    0.7486880
H    -2.5862560   -1.5385920    1.8948650
H    -3.7282580   -0.2908880    2.4619970
C     3.0839580    0.5971230    1.6162960
H     2.5862560    1.5385920    1.8948650
H     3.7282580    0.2908880    2.4619970
H     3.7288740    0.8092340    0.7486880
C     1.0870100    1.0369190    4.5087460
H     0.4588160    1.7596200    5.0630680
H     1.5505600    0.3576160    5.2496900
H     1.8997570    1.5927790    4.0154240
H    -0.1871460   -5.2192110   -0.9825610
H     0.1871460    5.2192110   -0.9825610
C     1.8623840    5.2556180    1.1581040
C     1.1980240    6.6530350    1.2745630
C     2.9069920    5.2756600    0.0108710
H     0.6825910    6.9418370    0.3418230
H     0.4557220    6.6693940    2.0929530
H     1.9650920    7.4208960    1.4871430
H     3.6798090    6.0401470    0.2151980
H     3.4030660    4.2937730   -0.0870130
H     2.4415150    5.5156760   -0.9609900
C    -1.8623840   -5.2556180    1.1581040
C    -1.1980240   -6.6530350    1.2745630
C    -2.9069920   -5.2756600    0.0108710
H    -0.6825910   -6.9418370    0.3418230
H    -0.4557220   -6.6693940    2.0929530
H    -1.9650920   -7.4208960    1.4871430
H    -3.6798090   -6.0401470    0.2151980
H    -3.4030660   -4.2937730   -0.0870130
H    -2.4415150   -5.5156760   -0.9609900
Cl   -1.3378110   -1.3199790   -1.5292160
Cl    1.3378110    1.3199790   -1.5292160
C    -2.6022740   -4.9656870    2.4816400
H    -1.9132290   -4.9636160    3.3457240
H    -3.1285470   -3.9943750    2.4532660
H    -3.3600640   -5.7494810    2.6600110
C     2.6022740    4.9656870    2.4816400
H     1.9132290    4.9636160    3.3457240
H     3.1285470    3.9943750    2.4532660
H     3.3600640    5.7494810    2.6600110
C    -1.8358020    3.7300720   -1.9130590
C    -3.1934670    3.5429010   -2.1374050
C    -3.6192060    3.9339440   -3.4411210
H    -3.8748050    3.1766250   -1.3660290
C    -2.5866910    4.4129070   -4.2189760
H    -4.6530240    3.8652670   -3.7896920
H    -2.6179800    4.7635890   -5.2514460
C     1.8358020   -3.7300720   -1.9130590
C     3.1934670   -3.5429010   -2.1374050
C     3.6192060   -3.9339440   -3.4411210
H     3.8748050   -3.1766250   -1.3660290
C     2.5866910   -4.4129070   -4.2189760
H     4.6530240   -3.8652670   -3.7896920
H     2.6179800   -4.7635890   -5.2514460
S    -1.0767910    4.3836740   -3.3622740
S     1.0767910   -4.3836740   -3.3622740
140
 M33-2-Me-4-(3,5-tBu)Ph-6-tBu
C     1.2840370   -2.3726160    1.2676510
C     0.4907900   -2.1794750    2.4679630
H     2.9885380   -1.1573630    0.4395380
C     0.9899860   -1.0043800    3.1768110
C     2.1142540   -0.5185630    2.3914180
C     2.2442860   -1.3145270    1.2202940
C    -2.1142540    0.5185630    2.3914180
C    -2.2442860    1.3145270    1.2202940
C    -1.2840370    2.3726160    1.2676510
C    -0.4907900    2.1794750    2.4679630
C    -0.9899860    1.0043800    3.1768110
C     1.0296560   -3.4863360    0.4001780
C     0.0000000   -4.3483390    0.7578900
C    -0.7844750   -4.2014700    1.9495240
H    -1.0814220   -3.0141760    3.7274490
C    -0.5368010   -3.1211870    2.7884630
H     1.0814220    3.0141760    3.7274490
C     0.5368010    3.1211870    2.7884630
C     0.7844750    4.2014700    1.9495240
C     0.0000000    4.3483390    0.7578900
C    -1.0296560    3.4863360    0.4001780
H    -2.9885380    1.1573630    0.4395380
Si    0.0000000    0.0000000    4.4561210
C     1.0891850    1.0361230    5.6180750
H     1.5589960    0.3566000    6.3548840
H     0.4611470    1.7552130    6.1773150
H     1.8970870    1.5966890    5.1219620
Zr    0.0000000    0.0000000    1.1189970
C     3.0845140    0.5900560    2.7294090
H     3.7485880    0.7820950    1.8715960
H     2.5881030    1.5402270    2.9802850
H     3.7092100    0.2948110    3.5934140
C    -3.0845140   -0.5900560    2.7294090
H    -2.5881030   -1.5402270    2.9802850
H    -3.7092100   -0.2948110    3.5934140
H    -3.7485880   -0.7820950    1.8715960
H     0.1868120    5.2103190    0.1088480
H    -0.1868120   -5.2103190    0.1088480
C     1.8280360   -3.7180670   -0.8350500
C     1.1748630   -3.9423900   -2.0623490
C     3.2364870   -3.7381860   -0.7979460
C     1.8990390   -4.1813140   -3.2451580
H     0.0814680   -3.8922570   -2.0824030
C     3.9962330   -3.9838860   -1.9566330
H     3.7382010   -3.5866850    0.1638230
C     3.3060030   -4.1996420   -3.1667650
H     3.8813260   -4.3841050   -4.0753680
C    -1.8280360    3.7180670   -0.8350500
C    -1.1748630    3.9423900   -2.0623490
C    -3.2364870    3.7381860   -0.7979460
C    -1.8990390    4.1813140   -3.2451580
H    -0.0814680    3.8922570   -2.0824030
C    -3.9962330    3.9838860   -1.9566330
H    -3.7382010    3.5866850    0.1638230
C    -3.3060030    4.1996420   -3.1667650
H    -3.8813260    4.3841050   -4.0753680
C    -1.0891850   -1.0361230    5.6180750
H    -0.4611470   -1.7552130    6.1773150
H    -1.5589960   -0.3566000    6.3548840
H    -1.8970870   -1.5966890    5.1219620
C    -5.5381860    4.0168420   -1.8655330
C    -6.0532130    2.6593250   -1.3198890
C    -5.9720020    5.1527690   -0.9023570
C    -6.2043150    4.2666110   -3.2360680
H    -5.7614680    1.8296190   -1.9886850
H    -5.6491940    2.4447270   -0.3144900
H    -7.1568140    2.6715400   -1.2438180
H    -5.6323380    6.1360380   -1.2750060
H    -7.0744140    5.1787710   -0.8123530
H    -5.5524080    5.0098540    0.1092010
H    -7.3028480    4.2757030   -3.1160300
H    -5.9066720    5.2400960   -3.6658470
H    -5.9526920    3.4746950   -3.9643960
C    -1.1392090    4.3925930   -4.5730030
C    -0.3173760    3.1174610   -4.8982580
C    -2.0891570    4.6723140   -5.7576650
C    -0.1765670    5.6004500   -4.4312600
H     0.4021540    2.8806490   -4.0952440
H    -0.9816970    2.2436670   -5.0239650
H     0.2510280    3.2590810   -5.8368900
H    -2.6919170    5.5843250   -5.5946670
H    -1.4962310    4.8220930   -6.6781090
H    -2.7790610    3.8283420   -5.9385360
H     0.3849270    5.7534520   -5.3720220
H    -0.7361080    6.5271350   -4.2083110
H     0.5582020    5.4424020   -3.6222180
C     5.5381860   -4.0168420   -1.8655330
C     6.0532130   -2.6593250   -1.3198890
C     5.9720020   -5.1527690   -0.9023570
C     6.2043150   -4.2666110   -3.2360680
H     5.7614680   -1.8296190   -1.9886850
H     5.6491940   -2.4447270   -0.3144900
H     7.1568140   -2.6715400   -1.2438180
H     5.6323380   -6.1360380   -1.2750060
H     7.0744140   -5.1787710   -0.8123530
H     5.5524080   -5.0098540    0.1092010
H     7.3028480   -4.2757030   -3.1160300
H     5.9066720   -5.2400960   -3.6658470
H     5.9526920   -3.4746950   -3.9643960
C     1.1392090   -4.3925930   -4.5730030
C     0.3173760   -3.1174610   -4.8982580
C     2.0891570   -4.6723140   -5.7576650
C     0.1765670   -5.6004500   -4.4312600
H    -0.4021540   -2.8806490   -4.0952440
H     0.9816970   -2.2436670   -5.0239650
H    -0.2510280   -3.2590810   -5.8368900
H     2.6919170   -5.5843250   -5.5946670
H     1.4962310   -4.8220930   -6.6781090
H     2.7790610   -3.8283420   -5.9385360
H    -0.3849270   -5.7534520   -5.3720220
H     0.7361080   -6.5271350   -4.2083110
H    -0.5582020   -5.4424020   -3.6222180
Cl    1.3470200    1.3106550   -0.4243690
Cl   -1.3470200   -1.3106550   -0.4243690
C    -1.8530270   -5.2686460    2.2636380
C    -2.8936650   -5.3046050    1.1132390
C    -1.1751770   -6.6589450    2.3875490
C    -2.6006870   -4.9812940    3.5830940
H    -3.3966970   -4.3272080    1.0064830
H    -2.4230580   -5.5489450    0.1448450
H    -3.6615900   -6.0733890    1.3201380
H    -0.4398330   -6.6663240    3.2123400
H    -1.9354010   -7.4353480    2.5941180
H    -0.6479340   -6.9416640    1.4595740
H    -3.3523260   -5.7711430    3.7613680
H    -1.9151020   -4.9702050    4.4498070
H    -3.1349260   -4.0145110    3.5492950
C     1.8530270    5.2686460    2.2636380
C     2.8936650    5.3046050    1.1132390
C     1.1751770    6.6589450    2.3875490
C     2.6006870    4.9812940    3.5830940
H     3.3966970    4.3272080    1.0064830
H     2.4230580    5.5489450    0.1448450
H     3.6615900    6.0733890    1.3201380
H     0.4398330    6.6663240    3.2123400
H     1.9354010    7.4353480    2.5941180
H     0.6479340    6.9416640    1.4595740
H     3.3523260    5.7711430    3.7613680
H     1.9151020    4.9702050    4.4498070
H     3.1349260    4.0145110    3.5492950
98
 M34_2-Me-4-(2-Me)Ph-6-tBu
C    -0.7370690    2.5957450    0.1504220
C     0.0000000    2.2335720    1.3464130
H    -2.6684180    1.7942500   -0.6752590
C    -0.7443510    1.1975480    2.0580190
C    -1.9510610    0.9712310    1.2762510
C    -1.9063750    1.7765650    0.1049730
C     1.9510610   -0.9712310    1.2762510
C     1.9063750   -1.7765650    0.1049730
C     0.7370690   -2.5957450    0.1504220
C     0.0000000   -2.2335720    1.3464130
C     0.7443510   -1.1975480    2.0580190
C    -0.2659480    3.6391670   -0.7098290
C     0.9269330    4.2586180   -0.3650320
C     1.6753870    3.9368480    0.8182240
H     1.7269100    2.7094070    2.5917410
C     1.2083520    2.9329960    1.6583920
H    -1.7269100   -2.7094070    2.5917410
C    -1.2083520   -2.9329960    1.6583920
C    -1.6753870   -3.9368480    0.8182240
C    -0.9269330   -4.2586180   -0.3650320
C     0.2659480   -3.6391670   -0.7098290
H     2.6684180   -1.7942500   -0.6752590
Si    0.0000000    0.0000000    3.3378880
C    -1.2885720   -0.7752950    4.4986560
H    -1.6042260   -0.0098390    5.2332880
H    -0.8294430   -1.6107120    5.0604010
H    -2.1960610   -1.1517490    4.0012390
Zr    0.0000000    0.0000000    0.0021360
C    -3.1411150    0.1047250    1.6191570
H    -3.8315580    0.0591120    0.7619550
H    -2.8665970   -0.9298280    1.8764470
H    -3.6849680    0.5351490    2.4810630
C     3.1411150   -0.1047250    1.6191570
H     2.8665970    0.9298280    1.8764470
H     3.6849680   -0.5351490    2.4810630
H     3.8315580   -0.0591120    0.7619550
H    -1.2902210   -5.0588800   -1.0183710
H     1.2902210    5.0588800   -1.0183710
C    -1.0293720    4.0454370   -1.9316420
C    -0.5048590    3.7292290   -3.2012530
C    -2.2551240    4.7571120   -1.8342410
C    -1.1822610    4.0939130   -4.3729200
H     0.4365060    3.1736570   -3.2567270
C    -2.9163040    5.1166990   -3.0237230
C    -2.3955030    4.7883930   -4.2832800
H    -2.9352330    5.0810750   -5.1905030
C     1.0293720   -4.0454370   -1.9316420
C     0.5048590   -3.7292290   -3.2012530
C     2.2551240   -4.7571120   -1.8342410
C     1.1822610   -4.0939130   -4.3729200
H    -0.4365060   -3.1736570   -3.2567270
C     2.9163040   -5.1166990   -3.0237230
C     2.3955030   -4.7883930   -4.2832800
H     2.9352330   -5.0810750   -5.1905030
C     1.2885720    0.7752950    4.4986560
H     0.8294430    1.6107120    5.0604010
H     1.6042260    0.0098390    5.2332880
H     2.1960610    1.1517490    4.0012390
Cl   -1.6085950   -0.9813360   -1.5345120
Cl    1.6085950    0.9813360   -1.5345120
C     2.9560960    4.7419920    1.1185930
C     3.9656090    4.5446360   -0.0432370
C     2.6041910    6.2480390    1.2446100
C     3.6355280    4.2979930    2.4314810
H     4.2377980    3.4797620   -0.1514090
H     3.5496030    4.8854930   -1.0073790
H     4.8871200    5.1243140    0.1523790
H     1.8965010    6.4187990    2.0760330
H     3.5193720    6.8366610    1.4426200
H     2.1449960    6.6405630    0.3204270
H     4.5445450    4.9028930    2.5996850
H     2.9734410    4.4391380    3.3050790
H     3.9433580    3.2372820    2.3952950
C    -2.9560960   -4.7419920    1.1185930
C    -3.9656090   -4.5446360   -0.0432370
C    -2.6041910   -6.2480390    1.2446100
C    -3.6355280   -4.2979930    2.4314810
H    -4.2377980   -3.4797620   -0.1514090
H    -3.5496030   -4.8854930   -1.0073790
H    -4.8871200   -5.1243140    0.1523790
H    -1.8965010   -6.4187990    2.0760330
H    -3.5193720   -6.8366610    1.4426200
H    -2.1449960   -6.6405630    0.3204270
H    -4.5445450   -4.9028930    2.5996850
H    -2.9734410   -4.4391380    3.3050790
H    -3.9433580   -3.2372820    2.3952950
H     3.8573690   -5.6758780   -2.9557810
H     0.7624900   -3.8322700   -5.3499720
H    -0.7624900    3.8322700   -5.3499720
H    -3.8573690    5.6758780   -2.9557810
C     2.8351100   -5.1602010   -0.4934840
H     3.2372310   -4.2900800    0.0589590
H     2.0674120   -5.6202100    0.1543020
H     3.6575030   -5.8835100   -0.6260500
C    -2.8351100    5.1602010   -0.4934840
H    -3.2372310    4.2900800    0.0589590
H    -2.0674120    5.6202100    0.1543020
H    -3.6575030    5.8835100   -0.6260500
74
 M35_2-Me-4-(2-Me)Ph-6-Cl
C     0.7635140    2.5891960    0.2603360
C     1.1842340    1.8863930    1.4614970
H    -1.2936560    2.9474710   -0.5696670
C     0.0000000    1.4085450    2.1667200
C    -1.1369070    1.8665710    1.3810960
C    -0.6629020    2.5232370    0.2124660
C     1.1369070   -1.8665710    1.3810960
C     0.6629020   -2.5232370    0.2124660
C    -0.7635140   -2.5891960    0.2603360
C    -1.1842340   -1.8863930    1.4614970
C     0.0000000   -1.4085450    2.1667200
C     1.7144000    3.2198750   -0.6072660
C     3.0595320    3.1016310   -0.2794480
C     3.4663210    2.4163110    0.9012840
H     2.9354490    1.3651510    2.6998450
C     2.5762890    1.8191740    1.7756380
H    -2.9354490   -1.3651510    2.6998450
C    -2.5762890   -1.8191740    1.7756380
C    -3.4663210   -2.4163110    0.9012840
C    -3.0595320   -3.1016310   -0.2794480
C    -1.7144000   -3.2198750   -0.6072660
H     1.2936560   -2.9474710   -0.5696670
Si    0.0000000    0.0000000    3.4506900
C    -1.5070030    0.0230670    4.6045470
H    -1.3652770    0.8325160    5.3460540
H    -1.5689570   -0.9323490    5.1589020
H    -2.4738180    0.1973720    4.1065090
Zr    0.0000000    0.0000000    0.1063390
C    -2.6073230    1.7706510    1.7180680
H    -3.2121380    2.1149420    0.8644430
H    -2.9352870    0.7482490    1.9604630
H    -2.8356470    2.4139190    2.5883730
C     2.6073230   -1.7706510    1.7180680
H     2.9352870   -0.7482490    1.9604630
H     2.8356470   -2.4139190    2.5883730
H     3.2121380   -2.1149420    0.8644430
H    -3.8207530   -3.5677260   -0.9100740
H     3.8207530    3.5677260   -0.9100740
C     1.2813380    3.9741610   -1.8247960
C     1.5552800    3.4299920   -3.0958250
C     0.6229120    5.2284640   -1.7192620
C     1.1710040    4.1022520   -4.2639010
C     0.2507990    5.8871830   -2.9061560
C     0.5129130    5.3350930   -4.1678190
C    -1.2813380   -3.9741610   -1.8247960
C    -1.5552800   -3.4299920   -3.0958250
C    -0.6229120   -5.2284640   -1.7192620
C    -1.1710040   -4.1022520   -4.2639010
C    -0.2507990   -5.8871830   -2.9061560
C    -0.5129130   -5.3350930   -4.1678190
C     1.5070030   -0.0230670    4.6045470
H     1.5689570    0.9323490    5.1589020
H     1.3652770   -0.8325160    5.3460540
H     2.4738180   -0.1973720    4.1065090
C     0.3528810    5.8759870   -0.3760950
H    -0.4513590    5.3554670    0.1772880
H     1.2494410    5.8541260    0.2690530
H     0.0446140    6.9270620   -0.5058030
C    -0.3528810   -5.8759870   -0.3760950
H     0.4513590   -5.3554670    0.1772880
H    -1.2494410   -5.8541260    0.2690530
H    -0.0446140   -6.9270620   -0.5058030
H     0.2478430   -6.8610890   -2.8345130
H    -1.3853770   -3.6606360   -5.2426820
H     1.3853770    3.6606360   -5.2426820
H    -0.2478430    6.8610890   -2.8345130
Cl   -1.8803810    0.0254450   -1.4245120
Cl    1.8803810   -0.0254450   -1.4245120
H    -0.2087780   -5.8723340   -5.0725410
H    -2.0597020   -2.4605290   -3.1557970
H     2.0597020    2.4605290   -3.1557970
H     0.2087780    5.8723340   -5.0725410
Cl    5.1904150    2.3703200    1.2711030
Cl   -5.1904150   -2.3703200    1.2711030
80
 M36_2-iPr-4-Ph
C    -2.5782040   -0.7210050    0.1910130
C    -2.1931810    0.0154770    1.3870920
H    -1.8247000   -2.6760190   -0.6152030
C    -1.1887550   -0.7581340    2.1115300
C    -1.0019590   -1.9825120    1.3459950
C    -1.7887160   -1.9148910    0.1626370
C     1.0019590    1.9825120    1.3459950
C     1.7887160    1.9148910    0.1626370
C     2.5782040    0.7210050    0.1910130
C     2.1931810   -0.0154770    1.3870920
C     1.1887550    0.7581340    2.1115300
C    -3.5923680   -0.2215330   -0.6951100
H    -4.9585300    1.4042420   -1.0174450
C    -4.1679950    1.0057680   -0.3733070
H    -4.3119720    2.6751200    1.0107720
C    -3.7987290    1.7332460    0.7913150
H    -2.6060480    1.8129990    2.5815080
C    -2.8316530    1.2637870    1.6651690
H     2.6060480   -1.8129990    2.5815080
C     2.8316530   -1.2637870    1.6651690
H     4.3119720   -2.6751200    1.0107720
C     3.7987290   -1.7332460    0.7913150
H     4.9585300   -1.4042420   -1.0174450
C     4.1679950   -1.0057680   -0.3733070
C     3.5923680    0.2215330   -0.6951100
H     1.8247000    2.6760190   -0.6152030
Si    0.0000000    0.0000000    3.3946520
C     0.8395770   -1.2289950    4.5790820
H     0.1118830   -1.5274900    5.3574630
H     1.6777320   -0.7139930    5.0864060
H     1.2324140   -2.1494790    4.1198290
C    -0.8395770    1.2289950    4.5790820
H    -1.2324140    2.1494790    4.1198290
H    -0.1118830    1.5274900    5.3574630
H    -1.6777320    0.7139930    5.0864060
Zr    0.0000000    0.0000000    0.0512460
C    -0.2531860   -3.2285330    1.8077930
H     0.7278040   -2.9256380    2.2136120
C     0.2531860    3.2285330    1.8077930
H    -0.7278040    2.9256380    2.2136120
C     4.0211780    0.9711210   -1.9053870
C     4.3578470    2.3417140   -1.8432440
C     4.1294500    0.3078900   -3.1477150
C     4.7939240    3.0246790   -2.9861810
H     4.3061350    2.8667890   -0.8836480
C     4.5596150    0.9944850   -4.2907400
H     3.8436950   -0.7466560   -3.2145850
C     4.8942400    2.3546900   -4.2149710
H     5.0620100    4.0844250   -2.9151040
H     4.6245350    0.4653540   -5.2475560
C    -4.0211780   -0.9711210   -1.9053870
C    -4.1294500   -0.3078900   -3.1477150
C    -4.3578470   -2.3417140   -1.8432440
C    -4.5596150   -0.9944850   -4.2907400
H    -3.8436950    0.7466560   -3.2145850
C    -4.7939240   -3.0246790   -2.9861810
H    -4.3061350   -2.8667890   -0.8836480
C    -4.8942400   -2.3546900   -4.2149710
H    -4.6245350   -0.4653540   -5.2475560
H    -5.0620100   -4.0844250   -2.9151040
Cl   -0.9595370    1.5425200   -1.5587470
Cl    0.9595370   -1.5425200   -1.5587470
H    -5.2296320   -2.8908770   -5.1090760
H     5.2296320    2.8908770   -5.1090760
C     1.0592950    3.8869070    2.9562910
H     2.0432930    4.2288840    2.5862250
H     0.5155290    4.7654080    3.3496570
H     1.2362060    3.1842510    3.7881500
C     0.0000000    4.2542620    0.6890520
H    -0.5849570    5.1016840    1.0889930
H     0.9516010    4.6637770    0.3022420
H    -0.5552400    3.8100830   -0.1529190
C    -1.0592950   -3.8869070    2.9562910
H    -2.0432930   -4.2288840    2.5862250
H    -0.5155290   -4.7654080    3.3496570
H    -1.2362060   -3.1842510    3.7881500
C     0.0000000   -4.2542620    0.6890520
H     0.5849570   -5.1016840    1.0889930
H    -0.9516010   -4.6637770    0.3022420
H     0.5552400   -3.8100830   -0.1529190
74
 M37_2-Et-4-Ph
C     0.0000000    2.6968510    0.2457600
C     0.5988850    2.1365710    1.4498260
H    -2.0740410    2.4410760   -0.5903680
C    -0.4080810    1.3501500    2.1563870
C    -1.6220410    1.4609910    1.3635770
C    -1.3481950    2.2238080    0.1933510
C     1.6220410   -1.4609910    1.3635770
C     1.3481950   -2.2238080    0.1933510
C     0.0000000   -2.6968510    0.2457600
C    -0.5988850   -2.1365710    1.4498260
C     0.4080810   -1.3501500    2.1563870
C     0.7518770    3.5523890   -0.6295580
H     2.6731220    4.4664900   -0.9217040
C     2.0778980    3.8032820   -0.2855980
H     3.7032700    3.5378150    1.1328640
C     2.6684190    3.2714300    0.8944290
H     2.4162030    2.1024790    2.6843250
C     1.9580890    2.4537890    1.7572770
H    -2.4162030   -2.1024790    2.6843250
C    -1.9580890   -2.4537890    1.7572770
H    -3.7032700   -3.5378150    1.1328640
C    -2.6684190   -3.2714300    0.8944290
H    -2.6731220   -4.4664900   -0.9217040
C    -2.0778980   -3.8032820   -0.2855980
C    -0.7518770   -3.5523890   -0.6295580
H     2.0740410   -2.4410760   -0.5903680
Si    0.0000000    0.0000000    3.4375210
C    -1.4301980   -0.4291050    4.6137440
H    -1.5218640    0.3827320    5.3605940
H    -1.1898970   -1.3608230    5.1602300
H    -2.4159780   -0.5546040    4.1389310
C     1.4301980    0.4291050    4.6137440
H     2.4159780    0.5546040    4.1389310
H     1.5218640   -0.3827320    5.3605940
H     1.1898970    1.3608230    5.1602300
Zr    0.0000000    0.0000000    0.0949070
C    -3.0178110    0.9805210    1.7018500
H    -2.9910170    0.0052100    2.2125720
C     3.0178110   -0.9805210    1.7018500
H     2.9910170   -0.0052100    2.2125720
C    -0.1520330   -4.1516920   -1.8509060
C     1.0928690   -4.8182300   -1.8090680
C    -0.8395050   -4.0885540   -3.0831030
C     1.6293000   -5.4072310   -2.9615370
H     1.6286610   -4.9007960   -0.8575890
C    -0.2982970   -4.6730350   -4.2357300
H    -1.7908310   -3.5495120   -3.1348360
C     0.9372210   -5.3351290   -4.1799670
H     2.5903370   -5.9300240   -2.9060110
H    -0.8410820   -4.6021200   -5.1844410
C     0.1520330    4.1516920   -1.8509060
C     0.8395050    4.0885540   -3.0831030
C    -1.0928690    4.8182300   -1.8090680
C     0.2982970    4.6730350   -4.2357300
H     1.7908310    3.5495120   -3.1348360
C    -1.6293000    5.4072310   -2.9615370
H    -1.6286610    4.9007960   -0.8575890
C    -0.9372210    5.3351290   -4.1799670
H     0.8410820    4.6021200   -5.1844410
H    -2.5903370    5.9300240   -2.9060110
Cl    1.7969430    0.5140620   -1.4535160
Cl   -1.7969430   -0.5140620   -1.4535160
H    -1.3600860    5.7907330   -5.0816780
H     1.3600860   -5.7907330   -5.0816780
C     3.7680640   -2.0016830    2.5845130
H     3.8436410   -2.9803040    2.0777620
H     4.7913830   -1.6455420    2.8011090
H     3.2456000   -2.1585520    3.5451980
C    -3.7680640    2.0016830    2.5845130
H    -3.8436410    2.9803040    2.0777620
H    -4.7913830    1.6455420    2.8011090
H    -3.2456000    2.1585520    3.5451980
H     3.5722700   -0.8225300    0.7605590
H    -3.5722700    0.8225300    0.7605590
88
 M38_2-Me-4-carbazolyl
C    -1.0935830   -2.4843030    0.9983920
C    -1.4265000   -1.7195130    2.1908240
H     0.9032820   -3.1119190    0.1786380
C    -0.1894280   -1.3969080    2.8969310
C     0.8793580   -2.0011610    2.1168750
C     0.3291900   -2.5968550    0.9488730
C    -0.8793580    2.0011610    2.1168750
C    -0.3291900    2.5968550    0.9488730
C     1.0935830    2.4843030    0.9983920
C     1.4265000    1.7195130    2.1908240
C     0.1894280    1.3969080    2.8969310
C    -2.1278000   -3.0121830    0.1616200
C    -3.4490740   -2.7232780    0.4786140
H    -4.8323510   -1.7796790    1.8599600
C    -3.7765600   -1.9530450    1.6294300
H    -3.0880770   -0.9463930    3.4027630
C    -2.8016000   -1.4675590    2.4866620
H     3.0880770    0.9463930    3.4027630
C     2.8016000    1.4675590    2.4866620
H     4.8323510    1.7796790    1.8599600
C     3.7765600    1.9530450    1.6294300
C     3.4490740    2.7232780    0.4786140
C     2.1278000    3.0121830    0.1616200
H    -0.9032820    3.1119190    0.1786380
Si    0.0000000    0.0000000    4.1783770
C     1.4895070   -0.2252590    5.3339040
H     1.2426800   -1.0108810    6.0734960
H     1.6756390    0.7128110    5.8901440
H     2.4250930   -0.5228650    4.8348180
Zr    0.0000000    0.0000000    0.8430070
C     2.3498200   -2.0948960    2.4541250
H     2.9036060   -2.5221100    1.6034280
H     2.8065620   -1.1211720    2.6888190
H     2.4924420   -2.7562130    3.3291100
C    -2.3498200    2.0948960    2.4541250
H    -2.8065620    1.1211720    2.6888190
H    -2.4924420    2.7562130    3.3291100
H    -2.9036060    2.5221100    1.6034280
H     4.2493730    3.1330710   -0.1444500
H    -4.2493730   -3.1330710   -0.1444500
C    -1.4895070    0.2252590    5.3339040
H    -1.6756390   -0.7128110    5.8901440
H    -1.2426800    1.0108810    6.0734960
H    -2.4250930    0.5228650    4.8348180
Cl    1.8676480   -0.2728040   -0.6726830
Cl   -1.8676480    0.2728040   -0.6726830
N     1.8011170    3.8493010   -0.9436180
C     2.2275610    3.6777600   -2.2768530
C     1.1324750    5.0853070   -0.8507670
C     2.9293300    2.6080040   -2.8542740
C     1.7945670    4.7958510   -3.0463380
C     0.6038980    5.7285540    0.2806930
C     1.0988820    5.6910390   -2.1407330
C     3.2060290    2.6822400   -4.2248970
H     3.2318060    1.7417050   -2.2611300
C     2.0833450    4.8415860   -4.4233770
C     0.0000000    6.9790960    0.0942420
H     0.6674820    5.2777090    1.2748530
C     0.4835700    6.9466230   -2.2989090
C     2.7922920    3.7854100   -5.0039850
H     3.7497130    1.8596110   -4.7009750
H     1.7553650    5.6925340   -5.0297290
C    -0.0687810    7.5811260   -1.1809350
H    -0.4217130    7.5002330    0.9602530
H     0.4469990    7.4240410   -3.2838070
H     3.0249470    3.8083650   -6.0735100
H    -0.5496390    8.5584250   -1.2912400
N    -1.8011170   -3.8493010   -0.9436180
C    -2.2275610   -3.6777600   -2.2768530
C    -1.1324750   -5.0853070   -0.8507670
C    -2.9293300   -2.6080040   -2.8542740
C    -1.7945670   -4.7958510   -3.0463380
C    -0.6038980   -5.7285540    0.2806930
C    -1.0988820   -5.6910390   -2.1407330
C    -3.2060290   -2.6822400   -4.2248970
H    -3.2318060   -1.7417050   -2.2611300
C    -2.0833450   -4.8415860   -4.4233770
C     0.0000000   -6.9790960    0.0942420
H    -0.6674820   -5.2777090    1.2748530
C    -0.4835700   -6.9466230   -2.2989090
C    -2.7922920   -3.7854100   -5.0039850
H    -3.7497130   -1.8596110   -4.7009750
H    -1.7553650   -5.6925340   -5.0297290
C     0.0687810   -7.5811260   -1.1809350
H     0.4217130   -7.5002330    0.9602530
H    -0.4469990   -7.4240410   -3.2838070
H    -3.0249470   -3.8083650   -6.0735100
H     0.5496390   -8.5584250   -1.2912400
128
 M39_2-Me-4-(3,5-tBu)Ph-6-Me-SiEt2
C    -0.4705480   -2.6522760    1.2840190
C    -0.9682750   -2.0032700    2.4858770
H     1.6206380   -2.7703520    0.4599390
C     0.1563240   -1.4019420    3.1973680
C     1.3372760   -1.7263960    2.4111890
C     0.9407970   -2.4279440    1.2401480
C    -1.3372760    1.7263960    2.4111890
C    -0.9407970    2.4279440    1.2401480
C     0.4705480    2.6522760    1.2840190
C     0.9682750    2.0032700    2.4858770
C    -0.1563240    1.4019420    3.1973680
C    -1.3598980   -3.3620050    0.4083660
C    -2.7065560   -3.3820060    0.7522570
C    -3.2214530   -2.7656670    1.9361660
H    -2.7505810   -1.6643830    3.7206700
C    -2.3626570   -2.0867890    2.7900670
H     2.7505810    1.6643830    3.7206700
C     2.3626570    2.0867890    2.7900670
C     3.2214530    2.7656670    1.9361660
C     2.7065560    3.3820060    0.7522570
C     1.3598980    3.3620050    0.4083660
H    -1.6206380    2.7703520    0.4599390
Si    0.0000000    0.0000000    4.4808990
C     1.5215260    0.1383750    5.6310890
H     1.5142260   -0.7759130    6.2592960
H     2.4593690    0.0803560    5.0513520
Zr    0.0000000    0.0000000    1.1386450
C     2.7892800   -1.4712920    2.7459630
H     3.4261990   -1.7613800    1.8951820
H     3.0051390   -0.4156530    2.9727320
H     3.0863640   -2.0746440    3.6241970
C    -2.7892800    1.4712920    2.7459630
H    -3.0051390    0.4156530    2.9727320
H    -3.0863640    2.0746440    3.6241970
H    -3.4261990    1.7613800    1.8951820
H     3.4021910    3.9321290    0.1081060
H    -3.4021910   -3.9321290    0.1081060
C    -0.8715290   -4.0461550   -0.8201240
C    -1.5124530   -3.8163250   -2.0529070
C     0.2149840   -4.9420660   -0.7720120
C    -1.0866960   -4.4578620   -3.2308560
H    -2.3351060   -3.0945760   -2.0807920
C     0.6637780   -5.6111990   -1.9256310
H     0.6936420   -5.1349620    0.1940650
C     0.0000000   -5.3507560   -3.1417620
H     0.3416620   -5.8558940   -4.0465720
C     0.8715290    4.0461550   -0.8201240
C     1.5124530    3.8163250   -2.0529070
C    -0.2149840    4.9420660   -0.7720120
C     1.0866960    4.4578620   -3.2308560
H     2.3351060    3.0945760   -2.0807920
C    -0.6637780    5.6111990   -1.9256310
H    -0.6936420    5.1349620    0.1940650
C     0.0000000    5.3507560   -3.1417620
H    -0.3416620    5.8558940   -4.0465720
C    -1.5215260   -0.1383750    5.6310890
H    -1.5142260    0.7759130    6.2592960
H    -2.4593690   -0.0803560    5.0513520
C    -1.8464310    6.5999670   -1.8228470
C    -3.0908360    5.8624090   -1.2632880
C    -1.4651870    7.7588100   -0.8646290
C    -2.2251250    7.2098140   -3.1900290
H    -3.3883460    5.0314550   -1.9279900
H    -2.8991440    5.4437610   -0.2592640
H    -3.9440410    6.5615670   -1.1792660
H    -0.5897130    8.3140710   -1.2471020
H    -2.3087030    8.4679400   -0.7661050
H    -1.2159940    7.3857790    0.1445910
H    -3.0767750    7.9023020   -3.0618620
H    -1.3897200    7.7847450   -3.6288010
H    -2.5297640    6.4332830   -3.9146770
C     1.8015100    4.1517580   -4.5651050
C     3.3076260    4.4992190   -4.4359790
C     1.6496810    2.6423450   -4.8903010
C     1.2210800    4.9622450   -5.7441800
H     3.4474280    5.5727900   -4.2136550
H     3.7916020    3.9182500   -3.6312380
H     3.8344260    4.2704100   -5.3814140
H     0.5850680    2.3709410   -5.0067940
H     2.1745600    2.4008670   -5.8338790
H     2.0733180    2.0087330   -4.0917420
H     1.7699870    4.7108170   -6.6697590
H     0.1542090    4.7309660   -5.9153210
H     1.3182950    6.0511870   -5.5817720
C     1.8464310   -6.5999670   -1.8228470
C     3.0908360   -5.8624090   -1.2632880
C     1.4651870   -7.7588100   -0.8646290
C     2.2251250   -7.2098140   -3.1900290
H     3.3883460   -5.0314550   -1.9279900
H     2.8991440   -5.4437610   -0.2592640
H     3.9440410   -6.5615670   -1.1792660
H     0.5897130   -8.3140710   -1.2471020
H     2.3087030   -8.4679400   -0.7661050
H     1.2159940   -7.3857790    0.1445910
H     3.0767750   -7.9023020   -3.0618620
H     1.3897200   -7.7847450   -3.6288010
H     2.5297640   -6.4332830   -3.9146770
C    -1.8015100   -4.1517580   -4.5651050
C    -3.3076260   -4.4992190   -4.4359790
C    -1.6496810   -2.6423450   -4.8903010
C    -1.2210800   -4.9622450   -5.7441800
H    -3.4474280   -5.5727900   -4.2136550
H    -3.7916020   -3.9182500   -3.6312380
H    -3.8344260   -4.2704100   -5.3814140
H    -0.5850680   -2.3709410   -5.0067940
H    -2.1745600   -2.4008670   -5.8338790
H    -2.0733180   -2.0087330   -4.0917420
H    -1.7699870   -4.7108170   -6.6697590
H    -0.1542090   -4.7309660   -5.9153210
H    -1.3182950   -6.0511870   -5.5817720
Cl    1.8643890    0.1857190   -0.4117670
Cl   -1.8643890   -0.1857190   -0.4117670
C    -4.6987530   -2.8830110    2.2419040
C     4.6987530    2.8830110    2.2419040
H    -5.3016920   -2.3790360    1.4629490
H    -4.9477420   -2.4262350    3.2145160
H    -5.0202260   -3.9410140    2.2656440
H     5.0202260    3.9410140    2.2656440
H     4.9477420    2.4262350    3.2145160
H     5.3016920    2.3790360    1.4629490
C     1.5343230    1.3924970    6.5318630
H     0.6389040    1.4400620    7.1779480
H     2.4186250    1.3983490    7.1953310
H     1.5584110    2.3210070    5.9325930
C    -1.5343230   -1.3924970    6.5318630
H    -0.6389040   -1.4400620    7.1779480
H    -2.4186250   -1.3983490    7.1953310
H    -1.5584110   -2.3210070    5.9325930
134
 M40_2-Et-4-(3,5-tBu)Ph-6-Me-SiEt2
C    -0.4626320   -2.6495050    1.1616720
C    -0.9565750   -1.9970210    2.3639230
H     1.6224800   -2.7618550    0.3242090
C     0.1724060   -1.4005120    3.0747230
C     1.3493180   -1.7198310    2.2800250
C     0.9471860   -2.4220700    1.1096540
C    -1.3493180    1.7198310    2.2800250
C    -0.9471860    2.4220700    1.1096540
C     0.4626320    2.6495050    1.1616720
C     0.9565750    1.9970210    2.3639230
C    -0.1724060    1.4005120    3.0747230
C    -1.3553870   -3.3587980    0.2886560
C    -2.7019970   -3.3713900    0.6324430
C    -3.2148970   -2.7432370    1.8108970
H    -2.7420910   -1.6313510    3.5868410
C    -2.3531500   -2.0660540    2.6628480
H     2.7420910    1.6313510    3.5868410
C     2.3531500    2.0660540    2.6628480
C     3.2148970    2.7432370    1.8108970
C     2.7019970    3.3713900    0.6324430
C     1.3553870    3.3587980    0.2886560
H    -1.6224800    2.7618550    0.3242090
Si    0.0000000    0.0000000    4.3595410
C     1.5051710    0.1903910    5.5273230
H     1.4945780   -0.6995920    6.1891330
H     2.4574710    0.1240220    4.9724820
Zr    0.0000000    0.0000000    1.0148180
C     2.8089310   -1.4955230    2.6153760
H     3.3794420   -1.4393750    1.6720010
H     2.9582190   -0.5308510    3.1251990
C    -2.8089310    1.4955230    2.6153760
H    -2.9582190    0.5308510    3.1251990
H    -3.3794420    1.4393750    1.6720010
H     3.4000050    3.9214950   -0.0091980
H    -3.4000050   -3.9214950   -0.0091980
C    -0.8690300   -4.0498030   -0.9366410
C    -1.5105440   -3.8261900   -2.1702810
C     0.2167750   -4.9463830   -0.8845710
C    -1.0861330   -4.4745240   -3.3450010
H    -2.3324300   -3.1037150   -2.2016050
C     0.6644390   -5.6220030   -2.0347830
H     0.6958850   -5.1343990    0.0822440
C     0.0000000   -5.3677020   -3.2518680
H     0.3407080   -5.8779290   -4.1541830
C     0.8690300    4.0498030   -0.9366410
C     1.5105440    3.8261900   -2.1702810
C    -0.2167750    4.9463830   -0.8845710
C     1.0861330    4.4745240   -3.3450010
H     2.3324300    3.1037150   -2.2016050
C    -0.6644390    5.6220030   -2.0347830
H    -0.6958850    5.1343990    0.0822440
C     0.0000000    5.3677020   -3.2518680
H    -0.3407080    5.8779290   -4.1541830
C    -1.5051710   -0.1903910    5.5273230
H    -1.4945780    0.6995920    6.1891330
H    -2.4574710   -0.1240220    4.9724820
C    -1.8463810    6.6111640   -1.9273680
C    -3.0913310    5.8720990   -1.3709480
C    -1.4640900    7.7653630   -0.9639870
C    -2.2249410    7.2274200   -3.2917110
H    -3.3894410    5.0441390   -2.0391010
H    -2.8998730    5.4489440   -0.3687140
H    -3.9440500    6.5714730   -1.2838620
H    -0.5883420    8.3217520   -1.3441730
H    -2.3070650    8.4746400   -0.8618770
H    -1.2147280    7.3874510    0.0433870
H    -3.0762550    7.9197190   -3.1603240
H    -1.3893100    7.8039620   -3.7279180
H    -2.5299540    6.4543180   -4.0198560
C     1.8016900    4.1751810   -4.6804170
C     3.3079680    4.5207160   -4.5483230
C     1.6488700    2.6677080   -5.0140120
C     1.2227770    4.9925850   -5.8554620
H     3.4484790    5.5929380   -4.3200080
H     3.7908830    3.9349550   -3.7464330
H     3.8352800    4.2966760   -5.4946210
H     0.5841170    2.3978170   -5.1326860
H     2.1741740    2.4310150   -5.9585730
H     2.0714660    2.0293670   -4.2186840
H     1.7722040    4.7458880   -6.7820060
H     0.1558680    4.7630340   -6.0286790
H     1.3206570    6.0805420   -5.6869380
C     1.8463810   -6.6111640   -1.9273680
C     3.0913310   -5.8720990   -1.3709480
C     1.4640900   -7.7653630   -0.9639870
C     2.2249410   -7.2274200   -3.2917110
H     3.3894410   -5.0441390   -2.0391010
H     2.8998730   -5.4489440   -0.3687140
H     3.9440500   -6.5714730   -1.2838620
H     0.5883420   -8.3217520   -1.3441730
H     2.3070650   -8.4746400   -0.8618770
H     1.2147280   -7.3874510    0.0433870
H     3.0762550   -7.9197190   -3.1603240
H     1.3893100   -7.8039620   -3.7279180
H     2.5299540   -6.4543180   -4.0198560
C    -1.8016900   -4.1751810   -4.6804170
C    -3.3079680   -4.5207160   -4.5483230
C    -1.6488700   -2.6677080   -5.0140120
C    -1.2227770   -4.9925850   -5.8554620
H    -3.4484790   -5.5929380   -4.3200080
H    -3.7908830   -3.9349550   -3.7464330
H    -3.8352800   -4.2966760   -5.4946210
H    -0.5841170   -2.3978170   -5.1326860
H    -2.1741740   -2.4310150   -5.9585730
H    -2.0714660   -2.0293670   -4.2186840
H    -1.7722040   -4.7458880   -6.7820060
H    -0.1558680   -4.7630340   -6.0286790
H    -1.3206570   -6.0805420   -5.6869380
Cl    1.8579500    0.1932500   -0.5445050
Cl   -1.8579500   -0.1932500   -0.5445050
C    -4.6942120   -2.8447670    2.1123910
C     4.6942120    2.8447670    2.1123910
H    -5.2896800   -2.3389500    1.3288610
H    -4.9418840   -2.3804020    3.0817300
H    -5.0261470   -3.8994440    2.1406190
H     5.0261470    3.8994440    2.1406190
H     4.9418840    2.3804020    3.0817300
H     5.2896800    2.3389500    1.3288610
C     1.4866140    1.4766550    6.3821040
H     0.5745130    1.5421550    7.0027110
H     2.3530790    1.5116570    7.0677670
H     1.5214300    2.3825990    5.7499400
C    -1.4866140   -1.4766550    6.3821040
H    -0.5745130   -1.5421550    7.0027110
H    -2.3530790   -1.5116570    7.0677670
H    -1.5214300   -2.3825990    5.7499400
C    -3.3681850    2.6336470    3.4962520
H    -3.2654220    3.6102600    2.9901590
H    -4.4396230    2.4666120    3.7091140
H    -2.8296680    2.6940680    4.4589990
C     3.3681850   -2.6336470    3.4962520
H     3.2654220   -3.6102600    2.9901590
H     4.4396230   -2.4666120    3.7091140
H     2.8296680   -2.6940680    4.4589990
76
 M41_2-Me-4-Ph-5-OMe
C    -0.4883480    2.6674530    0.4578840
C     0.2010320    2.2216990    1.6592820
H    -2.4807260    2.0381370   -0.3791330
C    -0.6411960    1.2575700    2.3613910
C    -1.8558190    1.1498340    1.5710830
C    -1.7258890    1.9518330    0.4025170
C     1.8558190   -1.1498340    1.5710830
C     1.7258890   -1.9518330    0.4025170
C     0.4883480   -2.6674530    0.4578840
C    -0.2010320   -2.2216990    1.6592820
C     0.6411960   -1.2575700    2.3613910
C     0.0756770    3.6534130   -0.4200990
C     1.3303100    4.1554300   -0.0657240
C     2.0069800    3.7423750    1.1199340
H     1.9922750    2.5326580    2.8966640
C     1.4713530    2.7951390    1.9730030
H    -1.9922750   -2.5326580    2.8966640
C    -1.4713530   -2.7951390    1.9730030
C    -2.0069800   -3.7423750    1.1199340
C    -1.3303100   -4.1554300   -0.0657240
C    -0.0756770   -3.6534130   -0.4200990
H     2.4807260   -2.0381370   -0.3791330
Si    0.0000000    0.0000000    3.6390790
C    -1.3525490   -0.6595490    4.7985980
H    -1.5850130    0.1246970    5.5444640
H    -0.9791970   -1.5447390    5.3473940
H    -2.2968300   -0.9331840    4.3017670
C     1.3525490    0.6595490    4.7985980
H     2.2968300    0.9331840    4.3017670
H     1.5850130   -0.1246970    5.5444640
H     0.9791970    1.5447390    5.3473940
Zr    0.0000000    0.0000000    0.3060400
C    -3.1250300    0.3966600    1.8981110
H    -3.6426900    0.8827770    2.7465410
H    -3.8016720    0.4040300    1.0289750
H    -2.9499970   -0.6559400    2.1686550
C     3.1250300   -0.3966600    1.8981110
H     3.6426900   -0.8827770    2.7465410
H     3.8016720   -0.4040300    1.0289750
H     2.9499970    0.6559400    2.1686550
C     0.6404390   -4.0998590   -1.6470160
C     1.9724020   -4.5653880   -1.5795970
C     0.0000000   -4.0636230   -2.9053030
C     2.6453060   -4.9834120   -2.7361540
H     2.4759260   -4.6184780   -0.6081780
C     0.6781600   -4.4749070   -4.0600800
H    -1.0281360   -3.6988920   -2.9687220
C     2.0009630   -4.9370710   -3.9812620
H     3.6755460   -5.3484920   -2.6627580
H     0.1701580   -4.4293630   -5.0294320
C    -0.6404390    4.0998590   -1.6470160
C     0.0000000    4.0636230   -2.9053030
C    -1.9724020    4.5653880   -1.5795970
C    -0.6781600    4.4749070   -4.0600800
H     1.0281360    3.6988920   -2.9687220
C    -2.6453060    4.9834120   -2.7361540
H    -2.4759260    4.6184780   -0.6081780
C    -2.0009630    4.9370710   -3.9812620
H    -0.1701580    4.4293630   -5.0294320
H    -3.6755460    5.3484920   -2.6627580
Cl    1.6805070    0.8450370   -1.2243490
Cl   -1.6805070   -0.8450370   -1.2243490
H    -2.5276050    5.2591370   -4.8860960
H     2.5276050   -5.2591370   -4.8860960
O    -1.9860600   -5.0804610   -0.8688200
C    -1.5662040   -6.4420460   -0.6525500
H    -1.7662470   -6.7553410    0.3914150
H    -2.1633490   -7.0562460   -1.3444680
H    -0.4899360   -6.5690750   -0.8760570
O     1.9860600    5.0804610   -0.8688200
C     1.5662040    6.4420460   -0.6525500
H     1.7662470    6.7553410    0.3914150
H     2.1633490    7.0562460   -1.3444680
H     0.4899360    6.5690750   -0.8760570
H     2.9722840    4.2105710    1.3350100
H    -2.9722840   -4.2105710    1.3350100
116
 M42_2-Me-4-(3,5-SiMe3)Ph
C    -1.2444120   -2.3901240    1.8828750
C    -1.5241120   -1.6231420    3.0882490
H     0.7162120   -3.1276030    1.0595120
C    -0.2708080   -1.3840580    3.7968510
C     0.7582180   -2.0473150    3.0117590
C     0.1700850   -2.5973400    1.8397630
C    -0.7582180    2.0473150    3.0117590
C    -0.1700850    2.5973400    1.8397630
C     1.2444120    2.3901240    1.8828750
C     1.5241120    1.6231420    3.0882490
C     0.2708080    1.3840580    3.7968510
C    -2.2984560   -2.7965110    0.9968530
C    -3.5945510   -2.4195120    1.3383380
H    -4.9260430   -1.4646610    2.7673300
C    -3.8822670   -1.6932540    2.5281170
C    -2.8802560   -1.2939210    3.3971230
C     2.8802560    1.2939210    3.3971230
H     4.9260430    1.4646610    2.7673300
C     3.8822670    1.6932540    2.5281170
C     3.5945510    2.4195120    1.3383380
C     2.2984560    2.7965110    0.9968530
H    -0.7162120    3.1276030    1.0595120
Si    0.0000000    0.0000000    5.0769540
C     1.4723340   -0.3135020    6.2354770
H     1.1756390   -1.0785840    6.9784330
H     1.7191420    0.6128970    6.7877510
H     2.3864590   -0.6730090    5.7371930
Zr    0.0000000    0.0000000    1.7371240
C     2.2199120   -2.2353340    3.3484550
H     2.7482730   -2.6822040    2.4913890
H     2.7348680   -1.2946190    3.5973890
H     2.3220540   -2.9169710    4.2137340
C    -2.2199120    2.2353340    3.3484550
H    -2.7348680    1.2946190    3.5973890
H    -2.3220540    2.9169710    4.2137340
H    -2.7482730    2.6822040    2.4913890
H     4.4228920    2.7267660    0.6913150
H    -4.4228920   -2.7267660    0.6913150
C    -2.0200330   -3.5697840   -0.2432080
C    -2.5226760   -3.1198090   -1.4822220
C    -1.2642190   -4.7609770   -0.2158200
C    -2.2826530   -3.8215410   -2.6832430
H    -3.0846940   -2.1779250   -1.4948790
C    -1.0072330   -5.5072700   -1.3861750
H    -0.8926770   -5.1192440    0.7528890
C    -1.5245770   -5.0119570   -2.6056790
H    -1.3267330   -5.5720490   -3.5278150
C     2.0200330    3.5697840   -0.2432080
C     2.5226760    3.1198090   -1.4822220
C     1.2642190    4.7609770   -0.2158200
C     2.2826530    3.8215410   -2.6832430
H     3.0846940    2.1779250   -1.4948790
C     1.0072330    5.5072700   -1.3861750
H     0.8926770    5.1192440    0.7528890
C     1.5245770    5.0119570   -2.6056790
H     1.3267330    5.5720490   -3.5278150
C    -1.4723340    0.3135020    6.2354770
H    -1.7191420   -0.6128970    6.7877510
H    -1.1756390    1.0785840    6.9784330
H    -2.3864590    0.6730090    5.7371930
Cl    1.8332030   -0.3860510    0.1914310
Cl   -1.8332030    0.3860510    0.1914310
H    -3.1309020   -0.7841470    4.3303340
H     3.1309020    0.7841470    4.3303340
Si    0.0000000    7.1257220   -1.2886070
Si    2.9375790    3.1256480   -4.3370670
Si    0.0000000   -7.1257220   -1.2886070
Si   -2.9375790   -3.1256480   -4.3370670
C     0.9519820    8.3927560   -0.2326900
H     0.3791030    9.3342040   -0.1275950
H     1.1458390    8.0011100    0.7837970
H     1.9293350    8.6369060   -0.6896330
C    -0.2771180    7.8283590   -3.0334340
H     0.6789510    8.0716050   -3.5343290
H    -0.8282660    7.1174140   -3.6774620
H    -0.8711620    8.7606190   -2.9793250
C    -1.6813100    6.7671550   -0.4691880
H    -2.2654580    6.0377380   -1.0610390
H    -1.5526840    6.3496580    0.5476110
H    -2.2824280    7.6921470   -0.3766230
C     4.8295600    2.9372380   -4.2277340
H     5.2389780    2.5044050   -5.1607650
H     5.3198930    3.9147420   -4.0609710
H     5.1178120    2.2691160   -3.3942400
C     2.4969220    4.3096620   -5.7590110
H     1.4024120    4.4318250   -5.8654800
H     2.9395240    5.3128200   -5.6102350
H     2.8822250    3.9137230   -6.7180670
C     2.1487440    1.4223370   -4.6445600
H     2.3613830    0.7282740   -3.8099210
H     1.0495450    1.5044790   -4.7370250
H     2.5384330    0.9655970   -5.5747100
C    -2.1487440   -1.4223370   -4.6445600
H    -2.3613830   -0.7282740   -3.8099210
H    -1.0495450   -1.5044790   -4.7370250
H    -2.5384330   -0.9655970   -5.5747100
C    -2.4969220   -4.3096620   -5.7590110
H    -1.4024120   -4.4318250   -5.8654800
H    -2.9395240   -5.3128200   -5.6102350
H    -2.8822250   -3.9137230   -6.7180670
C    -4.8295600   -2.9372380   -4.2277340
H    -5.2389780   -2.5044050   -5.1607650
H    -5.3198930   -3.9147420   -4.0609710
H    -5.1178120   -2.2691160   -3.3942400
C     0.2771180   -7.8283590   -3.0334340
H    -0.6789510   -8.0716050   -3.5343290
H     0.8282660   -7.1174140   -3.6774620
H     0.8711620   -8.7606190   -2.9793250
C    -0.9519820   -8.3927560   -0.2326900
H    -1.9293350   -8.6369060   -0.6896330
H    -0.3791030   -9.3342040   -0.1275950
H    -1.1458390   -8.0011100    0.7837970
C     1.6813100   -6.7671550   -0.4691880
H     2.2654580   -6.0377380   -1.0610390
H     1.5526840   -6.3496580    0.5476110
H     2.2824280   -7.6921470   -0.3766230
172
 M43_A_2-Me-4-[3,5-(1-adamantyl-4-OMe)Ph
C     2.5227870    2.8341920    0.9504520
C     1.7945860    4.0401080    1.3188330
H     3.0141290    2.0072600   -1.0845250
C     1.4063290    4.7474880    0.1026320
C     1.9398700    3.9607480   -0.9981150
C     2.5564880    2.7894100   -0.4788570
C    -1.9406090    3.9602230    0.9989600
C    -2.5570640    2.7889470    0.4793600
C    -2.5233890    2.8341900   -0.9499370
C    -1.7953330    4.0402950   -1.3179650
C    -1.4071290    4.7473370   -0.1015470
C     3.0536880    1.9490600    1.9490980
C     2.8309140    2.2923390    3.2804820
H     2.0376580    3.7197760    4.7153400
C     2.1418680    3.4806920    3.6518300
C     1.6271410    4.3498220    2.7039650
C    -1.6279970    4.3504660   -2.7030040
H    -2.0384700    3.7209690   -4.7145590
C    -2.1426200    3.4815440   -3.6511180
C    -2.8314670    2.2929630   -3.2801160
C    -3.0541660    1.9492710   -1.9488270
H    -3.0147050    2.0065980    1.0847730
Si   -0.0004860    6.0272720    0.0007040
C     0.1339520    7.1873730   -1.4975980
H     0.9282020    7.9308190   -1.2929750
H    -0.8158080    7.7389020   -1.6315370
H     0.3825790    6.6908320   -2.4488240
Zr   -0.0002870    2.6893120    0.0003730
C     1.9504810    4.2963320   -2.4719730
H     2.3201420    3.4351520   -3.0509600
H     0.9562770    4.5555470   -2.8673580
H     2.6233910    5.1546830   -2.6572720
C    -1.9511920    4.2952980    2.4729280
H    -0.9572340    4.5558150    2.8680480
H    -2.6252370    5.1526620    2.6587190
H    -2.3194600    3.4334290    3.0517770
H    -3.2347520    1.6467910   -4.0666850
H     3.2343070    1.6460130    4.0668670
C     3.7916710    0.7085480    1.5911930
C     3.4006210   -0.5204810    2.1416320
C     4.8650170    0.7207930    0.6792830
C     4.0725710   -1.7301070    1.8643920
H     2.5055780   -0.5330050    2.7701710
C     5.6245850   -0.4293150    0.4047370
H     5.1332200    1.6693610    0.2105240
C     5.2603240   -1.6283120    1.0904300
C    -3.7919000    0.7085230   -1.5912010
C    -3.4003290   -0.5203480   -2.1416170
C    -4.8654460    0.7204020   -0.6795230
C    -4.0718820   -1.7302230   -1.8644870
H    -2.5051740   -0.5325280   -2.7699990
C    -5.6247200   -0.4299630   -0.4052250
H    -5.1340420    1.6688700   -0.2107800
C    -5.2598550   -1.6288250   -1.0908220
C    -0.1350340    7.1870690    1.4992330
H     0.8146770    7.7386610    1.6332620
H    -0.9293540    7.9304790    1.2947560
H    -0.3836070    6.6903370    2.4503750
Cl    0.1625870    1.1422840   -1.8665870
Cl   -0.1629600    1.1414740    1.8666460
H     1.1501580    5.2829700    3.0125290
H    -1.1511330    5.2837560   -3.0113160
C    -6.7459800   -0.3858150    0.6635460
C    -8.1628960   -0.6385980    0.0653290
C    -6.7949620    0.9955340    1.3809080
C    -6.4662200   -1.4645330    1.7585580
H    -8.3802780    0.1308220   -0.7013250
H    -8.1855530   -1.6207790   -0.4304060
C    -9.2463740   -0.6129640    1.1688920
H    -7.0116090    1.7962130    0.6472030
H    -5.8072320    1.2201880    1.8281850
C    -7.8748040    1.0250990    2.4868940
H    -6.4262580   -2.4605220    1.2873800
H    -5.4740810   -1.2691530    2.2099880
C    -7.5581390   -1.4406200    2.8523080
H   -10.2317550   -0.8080570    0.7044330
C    -9.2607580    0.7656450    1.8597690
C    -8.9390150   -1.7102120    2.2131350
H    -7.8632930    2.0228510    2.9650090
C    -7.5728280   -0.0605080    3.5418440
H    -7.3343340   -2.2277620    3.5970220
H   -10.0456730    0.7965230    2.6408160
H    -9.5010300    1.5584360    1.1242160
H    -8.9458320   -2.7067980    1.7301710
H    -9.7245030   -1.7211650    2.9941980
H    -6.5935640    0.1355190    4.0208920
H    -8.3383290   -0.0363050    4.3423300
C    -3.3764930   -3.0339390   -2.3551680
C    -1.8910990   -2.9875780   -1.8519610
C    -3.3580450   -3.0935360   -3.9135930
C    -3.9704950   -4.3721120   -1.8235760
H    -1.3991050   -2.0568980   -2.1818830
H    -1.8911390   -2.9700760   -0.7451190
C    -1.0752010   -4.1929720   -2.3677920
H    -2.9201830   -2.1611800   -4.3182960
H    -4.3964000   -3.1500720   -4.2964900
C    -2.5457270   -4.3104670   -4.4137420
H    -3.9924250   -4.3587270   -0.7188430
H    -5.0088420   -4.5055730   -2.1630270
C    -3.1528780   -5.5868110   -2.3285210
H    -0.0342610   -4.0943420   -2.0061100
C    -1.0883790   -4.2006320   -3.9126970
C    -1.6950670   -5.4998740   -1.8367850
H    -2.5592660   -4.3202350   -5.5202870
C    -3.1763360   -5.6122540   -3.8730400
H    -3.6240560   -6.5083950   -1.9373190
H    -0.4911780   -5.0517340   -4.2944250
H    -0.6209530   -3.2749340   -4.3014640
H    -1.6638140   -5.5133910   -0.7297690
H    -1.1165190   -6.3757950   -2.1912100
H    -4.2185880   -5.7097960   -4.2365950
H    -2.6175740   -6.4913510   -4.2497410
C     3.3777260   -3.0340320    2.3553050
C     1.8923180   -2.9883390    1.8520780
C     3.3593160   -3.0933610    3.9137430
C     3.9722560   -4.3720880    1.8239980
H     1.3999860   -2.0577490    2.1817560
H     1.8923720   -2.9711100    0.7452290
C     1.0768730   -4.1939300    2.3681750
H     2.9211300   -2.1611050    4.3183130
H     4.3976980   -3.1494700    4.2966160
C     2.5474570   -4.3104980    4.4141350
H     3.9942540   -4.3589270    0.7192690
H     5.0106270   -4.5050900    2.1635700
C     3.1550800   -5.5869980    2.3291580
H     0.0358880   -4.0957760    2.0064900
C     1.0900690   -4.2012840    3.9130820
C     1.6972350   -5.5007000    1.8374110
H     2.5610030   -4.3200470    5.5206820
C     3.1785360   -5.6121600    3.8736810
H     3.6266020   -6.5084750    1.9381180
H     0.4931790   -5.0525280    4.2949790
H     0.6223120   -3.2756800    4.3016770
H     1.6659770   -5.5144400    0.7303990
H     1.1190240   -6.3767720    2.1920110
H     4.2208160   -5.7092630    4.2372710
H     2.6200840   -6.4913900    4.2505330
C     6.7454640   -0.3847840   -0.6644250
C     6.4656980   -1.4636320   -1.7593160
C     8.1626820   -0.6370560   -0.0667160
C     6.7937120    0.9965600   -1.3818440
H     6.4262560   -2.4596200   -1.2880930
H     5.4733280   -1.2686110   -2.2103940
C     7.5572170   -1.4393660   -2.8534540
H     8.1858600   -1.6192190    0.4290310
H     8.3800660    0.1324530    0.6998500
C     9.2457600   -0.6110790   -1.1706590
H     5.8057430    1.2208620   -1.8287700
H     7.0103550    1.7973370   -0.6482460
C     7.8731450    1.0264680   -2.4882180
H     7.3334260   -2.2266080   -3.5980650
C     8.9384140   -1.7084580   -2.2147650
C     7.5711730   -0.0592690   -3.5430330
H    10.2313760   -0.8058140   -0.7065480
C     9.2594150    0.7675170   -1.8615820
H     7.8611180    2.0242040   -2.9663540
H     9.7236300   -1.7191540   -2.9961040
H     8.9457490   -2.7050330   -1.7317840
H     6.5916690    0.1363980   -4.0217360
H     8.3363810   -0.0348150   -4.3437910
H     9.4996750    1.5604130   -1.1261390
H    10.0440370    0.7986460   -2.6429140
O    -6.1061930   -2.7365310   -0.9550640
O     6.1069340   -2.7357620    0.9544210
C    -6.9043400   -2.9645950   -2.1338310
H    -7.5051160   -3.8642950   -1.9251720
H    -7.5732570   -2.1054860   -2.3324200
H    -6.2715120   -3.1368430   -3.0243080
C     6.9055950   -2.9635220    2.1328730
H     7.5061100   -3.8633970    1.9242460
H     7.5747630   -2.1044620    2.3308550
H     6.2731970   -3.1353030    3.0237460
172
 M43_B_2-Me-4-[3,5-(1-adamantyl-4-OMe)Ph
C     2.5877820    2.7475650    0.7684100
C     1.8843230    3.9519960    1.1854700
H     2.9346390    1.9174050   -1.2944980
C     1.4095560    4.6565810   -0.0008590
C     1.8638670    3.8687800   -1.1354930
C     2.5180360    2.6991660   -0.6594590
C    -1.8636120    3.8690390    1.1348890
C    -2.5177850    2.6993620    0.6590380
C    -2.5874240    2.7474720   -0.7688510
C    -1.8838630    3.9517800   -1.1860950
C    -1.4091600    4.6565810    0.0001370
C     3.1994440    1.8711750    1.7280890
C     3.0757200    2.2206220    3.0711260
H     2.3797500    3.6475720    4.5555810
C     2.4052830    3.4040300    3.4882980
C     1.8167070    4.2662470    2.5778870
C    -1.8161210    4.2657530   -2.5785640
H    -2.3790450    3.6467140   -4.5561830
C    -2.4046790    3.4033890   -3.4888520
C    -3.0752360    2.2201210   -3.0714960
C    -3.1990930    1.8709370   -1.7283920
H    -2.9344780    1.9177590    1.2942090
Si    0.0001940    5.9371440   -0.0004360
C     0.0271350    7.0966200   -1.5049040
H     0.8315220    7.8423360   -1.3556020
H    -0.9310170    7.6455310   -1.5739200
H     0.2116080    6.5998880   -2.4705470
Zr    0.0001620    2.5963190   -0.0001240
C     1.7673410    4.2012970   -2.6069430
H     2.1007090    3.3413210   -3.2092780
H     0.7455040    4.4524540   -2.9306970
H     2.4193490    5.0637140   -2.8414280
C    -1.7669270    4.2017930    2.6062840
H    -0.7447540    4.4514290    2.9302000
H    -2.4176610    5.0652470    2.8404560
H    -2.1017130    3.3424510    3.2087360
H    -3.5493320    1.5874450   -3.8288450
H     3.5498090    1.5880370    3.8285570
C     3.9315720    0.6463200    1.3124860
C     3.6957120   -0.5731690    1.9622090
C     4.9269000    0.6886510    0.3155660
C     4.3559240   -1.7703130    1.6090930
H     2.9491460   -0.5879500    2.7616240
C     5.6051460   -0.4639020   -0.1128020
H     5.1847850    1.6590630   -0.1127590
C     5.2204180   -1.7043860    0.4835650
C    -3.9313730    0.6462400   -1.3126140
C    -3.6959300   -0.5733280   -1.9623460
C    -4.9264480    0.6887870   -0.3154440
C    -4.3562600   -1.7703360   -1.6089800
H    -2.9495990   -0.5883100   -2.7619800
C    -5.6047880   -0.4636160    0.1131690
H    -5.1840430    1.6592620    0.1129070
C    -5.2204240   -1.7042010   -0.4832080
C    -0.0268510    7.0966940    1.5039670
H     0.9311140    7.6459600    1.5727540
H    -0.8315400    7.8421090    1.3547750
H    -0.2109450    6.5999510    2.4696740
Cl    0.0223370    1.0498770   -1.8736760
Cl   -0.0221260    1.0505980    1.8740400
H     1.3597890    5.1986570    2.9173160
H    -1.3591370    5.1980790   -2.9181410
C    -6.7851820   -0.3472560    1.1110070
C    -8.0671070   -0.9712550    0.4716370
C    -7.1101630    1.1404560    1.4366970
C    -6.5097700   -1.0614290    2.4689760
H    -8.2866920   -0.4464020   -0.4784860
H    -7.8746280   -2.0299210    0.2300970
C    -9.2756920   -0.8582630    1.4281230
H    -7.3172550    1.6921740    0.4995690
H    -6.2351640    1.6238980    1.9136520
C    -8.3269360    1.2638950    2.3825310
H    -6.3033950   -2.1276330    2.2922670
H    -5.6113780   -0.6182540    2.9417650
C    -7.7258700   -0.9422870    3.4176950
H   -10.1564410   -1.3243910    0.9470240
C    -9.5685370    0.6278040    1.7217790
C    -8.9602020   -1.5913600    2.7511290
H    -8.5164380    2.3366770    2.5757970
C    -8.0214370    0.5422010    3.7118530
H    -7.4928720   -1.4707920    4.3616320
H   -10.4465430    0.7238130    2.3905270
H    -9.8146500    1.1599530    0.7820130
H    -8.7656500   -2.6636100    2.5539530
H    -9.8314540   -1.5381710    3.4332040
H    -7.1511660    1.0129100    4.2102260
H    -8.8820140    0.6336060    4.4033440
C    -4.1034730   -2.9998990   -2.5293770
C    -2.6296240   -3.4927080   -2.3936870
C    -4.3235070   -2.5359170   -4.0113370
C    -5.0498580   -4.2188400   -2.3159570
H    -1.9352660   -2.6477220   -2.5607840
H    -2.4502970   -3.8488430   -1.3603920
C    -2.3296880   -4.6273550   -3.4005770
H    -3.6821010   -1.6670180   -4.2398500
H    -5.3723470   -2.2009230   -4.1283430
C    -4.0056120   -3.6622180   -5.0191570
H    -4.9346690   -4.6341960   -1.3040170
H    -6.1027710   -3.8961530   -2.4117870
C    -4.7421140   -5.3508920   -3.3266330
H    -1.2801640   -4.9527420   -3.2707640
C    -2.5377630   -4.1101540   -4.8414290
C    -3.2806260   -5.8166540   -3.1428590
H    -4.1536270   -3.2723630   -6.0441860
C    -4.9477990   -4.8559060   -4.7711330
H    -5.4271750   -6.1951020   -3.1211860
H    -2.2928170   -4.9071670   -5.5704520
H    -1.8536560   -3.2628340   -5.0435170
H    -3.1319460   -6.2067320   -2.1165390
H    -3.0527650   -6.6456900   -3.8413050
H    -6.0006990   -4.5478350   -4.9228420
H    -4.7379390   -5.6706270   -5.4919220
C     4.1026830   -2.9998420    2.5294060
C     2.6289410   -3.4927490    2.3929710
C     4.3218690   -2.5358210    4.0114880
C     5.0493140   -4.2186960    2.3165420
H     1.9344560   -2.6477950    2.5597200
H     2.4501310   -3.8489060    1.3595940
C     2.3285750   -4.6274130    3.3997130
H     3.6802240   -1.6670100    4.2396600
H     5.3706030   -2.2006920    4.1290530
C     4.0035610   -3.6621340    5.0191630
H     4.9347810   -4.6340860    1.3045410
H     6.1021360   -3.8958810    2.4129790
C     4.7411120   -5.3507600    3.3270630
H     1.2791490   -4.9528950    3.2693430
C     2.5358430   -4.1101940    4.8406740
C     3.2797550   -5.8166310    3.1425060
H     4.1510030   -3.2722380    6.0442590
C     4.9459820   -4.8557460    4.7716690
H     5.4263450   -6.1949220    3.1219890
H     2.2905820   -4.9072290    5.5695680
H     1.8515620   -3.2629300    5.0424050
H     3.1316600   -6.2067230    2.1161060
H     3.0515810   -6.6456860    3.8408270
H     5.9987740   -4.5475860    4.9239380
H     4.7357980   -5.6704740    5.4923550
C     6.7857140   -0.3478270   -1.1104650
C     6.5100820   -1.0617450   -2.4685320
C     8.0674240   -0.9722440   -0.4710850
C     7.1112000    1.1398130   -1.4360170
H     6.3031400   -2.1278740   -2.2920140
H     5.6119230   -0.6180870   -2.9413130
C     7.7262910   -0.9429830   -3.4171480
H     7.8746350   -2.0308480   -0.2295670
H     8.2871330   -0.4474660    0.4790520
C     9.2760810   -0.8596100   -1.4275190
H     6.2364190    1.6235760   -1.9130420
H     7.3183500    1.6913840   -0.4988130
C     8.3280750    1.2629300   -2.3817610
H     7.4931870   -1.4713150   -4.3611570
C     8.9603690   -1.5925260   -2.7505710
C     8.0223850    0.5414370   -3.7111600
H    10.1566430   -1.3260850   -0.9464160
C     9.5694500    0.6263700   -1.7210520
H     8.5179330    2.3356630   -2.5749440
H     9.8316540   -1.5396120   -3.4326260
H     8.7654360   -2.6647180   -2.5534520
H     7.1522990    1.0124820   -4.2095380
H     8.8830290    0.6326010   -4.4025980
H     9.8157380    1.1583480   -0.7812350
H    10.4474910    0.7221490   -2.3897880
O    -5.7511260   -2.8768980    0.0680480
O     5.7510770   -2.8771900   -0.0674940
C    -4.7955080   -3.5706610    0.8972750
H    -5.3186520   -4.4596130    1.2846660
H    -3.9083860   -3.8835330    0.3156710
H    -4.4633530   -2.9334070    1.7383360
C     4.7956540   -3.5709180   -0.8969570
H     5.3191240   -4.4594740   -1.2848200
H     3.9087310   -3.8844580   -0.3154060
H     4.4631750   -2.9333960   -1.7376850
